# Supplementary material for: Can Education Compensate for Poor Healthcare? Racial Inequalities in Psychedelic-Associated Psychological Distress
Source: Research Square preprint supplement (doi:10.21203/rs.3.rs-8483640/v1), 2026-01-14
Supplement: Supplementary file 1 [file e448957ceb89cc4ac68a5c61.docx]

| **Supplemental Table 1.** Mean and Proportion Differences of Dependent, Independent, and Control Variables by Having Private Health Insurance vs not Having Private Health Insurance and Having Public Health Insurance vs Not Having Public Health Insurance (Weighted) | | | | | | | | |
| --- | --- | --- | --- | --- | --- | --- | --- | --- |
|  | No Private Insurance | Private Insurance | No Private Health Insurance (-) Private Health Insurance | | No Public Insurance | Public Insurance | No Public Health Insurance (-) Public Health Insurance | |
| Psychological Distress in Last Month (K6) | 10.99 | 8.87 | 2.12 | *** | 9.50 | 9.81 | -0.31 | *** |
|  | (10.90-11.08) | (8.81-8.92) | (2.02-2.22) |  | (9.44 - 9.55) | (9.70 - 9.90) | (-0.43 - -0.19) |  |
| Educational Attainment | 2.27 | 3.00 | -0.73 | *** | 2.88 | 2.49 | 0.39 | *** |
|  | (2.26-2.28) | (2.99-3.00) | (-0.74--0.72) |  | (2.87 - 2.89) | (2.47 - 2.50) | (0.38 - 0.40) |  |
| Health Insurance |  |  |  |  |  |  |  |  |
| Uninsured | 0.39 | 0.00 | 0.39 | *** | 0.19 | 0.00 | 0.19 | *** |
|  | (0.39-0.39) | (0.00 - 0.00) | (0.39-0.39) |  | (0.19 - 0.20) | (0.00 - 0.00) | (0.19 - 0.20) |  |
| Private |  |  |  |  | 0.78 | 0.43 | 0.35 | *** |
|  |  | (0.77 - 0.78) |  |  | (0.42 - 0.44) |  | (0.34 - 0.35) |  |
| Public | 0.55 | 0.21 | 0.34 | *** |  |  |  |  |
|  | (0.55-0.55) | (0.21-0.21) | (0.34-0.34) |  |  |  |  |  |
| Other | 0.06 | 0.00 | 0.06 | *** | 0.03 | 0.00 | 0.03 | *** |
|  | (0.06-0.06) | (0.00-0.00) | (0.06-0.06) |  | (0.03 - 0.03) | (0.00 - 0.00) | (0.03 - 0.03) |  |
| Lifetime Psychedelic Use |  |  |  |  |  |  |  |  |
| MDMA | 0.08 | 0.06 | 0.02 | *** | 0.09 | 0.04 | 0.04 | *** |
|  | (0.08-0.09) | (0.06-0.07) | (0.02-0.02) |  | (0.08 - 0.09) | (0.04 - 0.04) | (0.04 - 0.05) |  |
| Psilocybin | 0.09 | 0.09 | 0.00 |  | 0.11 | 0.06 | 0.05 | *** |
|  | (0.09-0.10) | (0.09-0.09) | (-0.00-0.00) |  | (0.11 - 0.11) | (0.05 - 0.06) | (0.05 - 0.06) |  |
| DMT | 0.00 | 0.00 | 0.00 | * | 0.00 | 0.00 | 0.00 | *** |
|  | (0.00-0.00) | (0.00-0.00) | (0.00-0.00) |  | (0.00 - 0.00) | (0.00 - 0.00) | (0.00 - 0.00) |  |
| Ayahuasca | 0.00 | 0.00 | 0.00 |  | 0.00 | 0.00 | 0.00 | * |
|  | (0.00-0.00) | (0.00-0.00) | (-0.00-0.00) |  | (0.00 - 0.00) | (0.00 - 0.00) | (0.00 - 0.00) |  |
| Peyote/Mescaline | 0.05 | 0.04 | 0.00 | *** | 0.05 | 0.04 | 0.01 | *** |
|  | (0.04-0.05) | (0.04-0.04) | (0.00-0.01) |  | (0.04 - 0.05) | (0.03 - 0.04) | (0.00 - 0.01) |  |
| LSD | 0.11 | 0.10 | 0.01 | *** | 0.12 | 0.08 | 0.04 | *** |
|  | (0.11-0.11) | (0.10-0.10) | (0.01-0.01) |  | (0.11 - 0.12) | (0.07 - 0.08) | (0.04 - 0.05) |  |
| Classic Psychedelics | 0.14 | 0.14 | 0.01 | ** | 0.16 | 0.09 | 0.06 | *** |
|  | (0.14-0.14) | (0.14-0.14) | (0.00-0.01) |  | (0.15 - 0.16) | (0.09 - 0.10) | (0.06 - 0.07) |  |
| Race/Ethnicity |  |  |  |  |  |  |  |  |
| White | 0.52 | 0.73 | -0.21 | *** | 0.65 | 0.67 | -0.02 | *** |
|  | (0.51-0.52) | (0.72-0.73) | (-0.22--0.21) |  | (0.64 - 0.65) | (0.66 - 0.67) | (-0.02 - -0.01) |  |
| Black | 0.17 | 0.09 | 0.08 | *** | 0.11 | 0.14 | -0.03 | *** |
|  | (0.17-0.17) | (0.09-0.09) | (0.08-0.08) |  | (0.10 - 0.11) | (0.13 - 0.14) | (-0.03 - -0.03) |  |
| Hispanic | 0.24 | 0.10 | 0.14 | *** | 0.16 | 0.13 | 0.03 | *** |
|  | (0.24-0.25) | (0.10-0.10) | (0.13-0.14) |  | (0.16 - 0.16) | (0.12 - 0.13) | (0.03 - 0.04) |  |
| Asian | 0.04 | 0.06 | -0.02 | *** | 0.06 | 0.03 | 0.03 | *** |
|  | (0.04-0.04) | (0.06-0.06) | (-0.02--0.02) |  | (0.05 - 0.06) | (0.03 - 0.03) | (0.03 - 0.03) |  |
| Hawaiian/Pacific Islander | 0.00 | 0.00 | 0.00 | *** | 0.00 | 0.01 | 0.00 |  |
|  | (0.004-0.004) | (0.003-0.003) | (0.00-0.00) |  | (0.00 - 0.00) | (0.00 - 0.00) | (0.00 - 0.00) |  |
| Native American | 0.01 | 0.00 | 0.01 | *** | 0.01 | 0.02 | 0.00 | *** |
|  | (0.01-0.01) | (0.003-0.003) | (0.01-0.01) |  | (0.00 - 0.00) | (0.00 - 0.01) | (-0.00 - -0.00) |  |
| Two or More Race (non-Hispanic) | 0.02 | 0.01 | 0.01 | *** | 4.75 | 5.29 | -0.01 | *** |
|  | (0.02-0.02) | (0.01-0.01) | (0.01-0.01) |  | (0.01 - 0.01) | (0.01 - 0.02) | (-0.01 - -0.00) |  |
| Women | 0.52 | 0.52 | 0.01 | ** | 0.50 | 0.56 | -0.06 | *** |
|  | (0.52-0.52) | (0.51-0.52) | (0.00-0.01) |  | (0.49 - 0.50) | (0.55 - 0.56) | (-0.07 - -0.06) |  |
| Age | 8.39 | 8.81 | -0.43 | *** | 8.20 | 9.64 | -1.43 | *** |
|  | (8.37-8.40) | (8.80-8.83) | (-0.45--0.41) |  | (8.19 - 8.22) | (9.62 - 9.65) | (-1.45 - -1.41) |  |
| Family Income | 3.64 | 5.63 | -1.99 | *** | 5.35 | 4.16 | 1.19 | *** |
|  | (3.62-3.66) | (5.62-5.65) | (-2.01--1.97) |  | (5.33 - 5.37) | (4.13 - 4.18) | (1.17 - 1.22) |  |
| Marital Status |  |  |  |  |  |  |  |  |
| Single, never Married | 0.37 | 0.23 | 0.14 | *** | 0.31 | 0.20 | 0.32 | *** |
|  | (0.37-0.38) | (0.23-0.23) | (0.14-0.15) |  | (0.63 - 0.64) | (0.31 - 0.33) | (0.31 - 0.33) |  |
| Married | 0.36 | 0.61 | -0.24 | *** | 0.55 | 0.48 | 0.11 | *** |
|  | (0.36-0.37) | (0.60-0.61) | (-0.25--0.24) |  | (0.31 - 0.32) | (0.20 - 0.21) | (0.11 - 0.11) |  |
| Widowed | 0.07 | 0.05 | 0.02 | *** | 0.02 | 0.15 | 0.07 | *** |
|  | (0.07-0.08) | (0.05-0.05) | (0.02-0.02) |  | (0.54 - 0.55) | (0.47 - 0.49) | (0.06 - 0.07) |  |
| Divorced/Separated | 0.19 | 0.11 | 0.08 | *** | 0.12 | 0.17 | -0.13 | *** |
|  | (0.19-0.19) | (0.11-0.11) | (0.08-0.08) |  | (0.01 - 0.02) | (0.14 - 0.15) | (-0.13 - -0.13) |  |
| Children | 0.54 | 0.53 | 0.01 | ** | 0.64 | 0.32 | -0.05 | *** |
|  | (0.53-0.55) | (0.52-0.54) | (0.00-0.02) |  | (0.12 - 0.13) | (0.16 - 0.17) | (-0.05 - -0.04) |  |
| Religiosity | 5.01 | 4.88 | 0.13 | *** | 1.84 | 2.00 | -0.54 | *** |
|  | (5.00-5.03) | (4.86-4.90) | (0.10-0.15) |  | (4.73 - 4.76) | (5.26 - 5.31) | (-0.57 - -0.52) |  |
| Religious Attendance | 1.65 | 2.02 | -0.37 | *** | 0.18 | 0.12 | -0.16 | *** |
|  | (1.63-1.66) | (2.00-2.03) | (-0.39--0.35) |  | (1.83 - 1.85) | (1.98 - 2.01) | (-0.18 - -0.14) |  |
| Lifetime Drug Use |  |  |  |  |  |  |  |  |
| Cocaine | 0.18 | 0.15 | 0.03 | *** | 0.52 | 0.35 | 0.07 | *** |
|  | (0.17-0.18) | (0.15-0.15) | (0.02-0.03) |  | (0.18 - 0.19) | (0.11 - 0.12) | (0.06 - 0.07) |  |
| Marijuana | 0.45 | 0.47 | -0.02 | *** | 0.03 | 0.03 | 0.17 | *** |
|  | (0.44-0.45) | (0.47-0.47) | (-0.03--0.02) |  | (0.51 - 0.52) | (0.34 - 0.35) | (0.17 - 0.18) |  |
| PCP | 0.03 | 0.02 | 0.01 | *** | 0.10 | 0.06 | 0.00 | ** |
|  | (0.03-0.03) | (0.02-0.02) | (0.01-0.01) |  | (0.02 - 0.03) | (0.02 - 0.03) | (0.00 - 0.00) |  |
| Inhalants | 0.09 | 0.09 | 0.00 |  | 0.11 | 0.08 | 0.05 | *** |
|  | (0.08-0.09) | (0.08-0.09) | (-0.00-0.00) |  | (0.10 - 0.11) | (0.05 - 0.06) | (0.04 - 0.05) |  |
| Stimulants | 0.10 | 0.10 | -0.01 | ** | 0.08 | 0.10 | 0.04 | *** |
|  | (0.09-0.10) | (0.10-0.10) | (-0.01--0.00) |  | (0.11 - 0.12) | (0.07 - 0.08) | (0.04 - 0.04) |  |
| Sedatives | 0.08 | 0.08 | 0.00 | *** | 0.16 | 0.17 | -0.02 | *** |
|  | (0.08-0.08) | (0.08-0.08) | (-0.01--0.00) |  | (0.07 - 0.08) | (0.09 - 0.10) | (-0.02 - -0.02) |  |
| Tranquilizer | 0.17 | 0.16 | 0.00 | * | 0.02 | 0.02 | -0.01 | *** |
|  | (0.16-0.17) | (0.16-0.16) | (0.00-0.01) |  | (0.16 - 0.17) | (0.17 - 0.18) | (-0.02 - -0.01) |  |
| Heroine | 0.03 | 0.01 | 0.02 | *** | 0.36 | 0.36 | 0.00 | *** |
|  | (0.03-0.03) | (0.01-0.01) | (0.02-0.02) |  | (0.01 - 0.02) | (0.02 - 0.02) | (-0.01 - -0.00) |  |
| Pain Relievers | 0.35 | 0.37 | -0.02 | *** | 0.57 | 0.57 | 0.00 |  |
|  | (0.34-0.35) | (0.36-0.37) | (-0.03--0.02) |  | (0.36 - 0.36) | (0.35 - 0.36) | (0.00 - 0.00) |  |
| Tobacco | 0.57 | 0.57 | 0.00 |  | 2.76 | 3.12 | 0.00 | * |
|  | (0.57-0.58) | (0.57-0.58) | (-0.01-0.00) |  | (0.57 - 0.58) | (0.56 - 0.57) | (-0.00 - 0.01) |  |
| Age of First Alcohol Use | 3.02 | 2.81 | 0.21 | *** | 1.70 | 1.48 | -0.35 | *** |
|  | (3.00-3.03) | (2.80-2.81) | (0.20-0.22) |  | (2.75 - 2.77) | (3.10 - 3.12) | (-0.37 - -0.34) |  |
| Thrill Seeking Behavior | 1.57 | 1.66 | -0.09 | *** | 1.70 | 1.48 | 0.22 | *** |
|  | (1.56-1.58) | (1.65-1.67) | (-0.10--0.08) |  | (1.70 - 1.71) | (1.47 - 1.48) | (0.22 - 0.23) |  |
| Source: 2008-2019 National Survey of Drug Use and Health, n=*484,732*  a. Calculated with T-Tests  b. Standard deviations in parentheses.  †p < 0.10, *p < 0.05, **p < 0.01, ***p < 0.001 (two-tailed) | | | | | | | | |

| **Supplemental Table 2.** Mean and Proportion Differences of Dependent, Independent, and Control Variables by being White vs Not Being White and Being Black vs Not Being Black (Weighted) | | | | | | | | |
| --- | --- | --- | --- | --- | --- | --- | --- | --- |
|  | Not White | White | Not White (-) White | | Not Black | Black | Not Black (-) Black | |
| Psychological Distress in Last Month (K6) | 9.74 | 9.52 | 0.22 | *** | 9.62 | 9.34 | 0.28 | *** |
|  | (9.65-9.83) | (9.46-9.58) | (0.11-0.32) |  | (9.56-9.67) | (9.21-9.46) | (0.14-0.42) |  |
| Educational Attainment | 2.51 | 2.88 | -0.36 | *** | 2.78 | 2.51 | 0.28 | *** |
|  | (2.50-2.52) | (2.87-2.88) | (-0.37--0.35) |  | (2.78-2.79) | (2.49-2.52) | (0.26-0.30) |  |
| Health Insurance |  |  |  |  |  |  |  |  |
| Uninsured | 0.2 | 0.09 | 0.11 | *** | 0.13 | 0.16 | -0.03 | *** |
|  | (0.20-0.21) | (0.09-0.09) | (0.11-0.11) |  | (0.13-0.13) | (0.16-0.17) | (-0.04--0.03) |  |
| Private | 0.53 | 0.74 | -0.21 | *** | 0.68 | 0.51 | 0.17 | *** |
|  | (0.52-0.53) | (0.73-0.74) | (-0.22--0.20) |  | (0.68-0.69) | (0.50-0.52) | (0.16-0.18) |  |
| Public | 0.31 | 0.33 | -0.02 | *** | 0.32 | 0.39 | -0.07 | *** |
|  | (0.31-0.32) | (0.33-0.33) | (-0.02--0.01) |  | (0.31-0.32) | (0.38-0.40) | (-0.08--0.07) |  |
| Other | 0.03 | 0.01 | 0.01 | *** | 0.02 | 0.03 | -0.01 | *** |
|  | (0.03-0.03) | (0.01-0.02) | (0.01-0.02) |  | (0.02-0.02) | (0.03-0.03) | (-0.01--0.01) |  |
| Lifetime Psychedelic Use |  |  |  |  |  |  |  |  |
| MDMA | 0.06 | 0.08 | -0.02 | *** | 0.07 | 0.04 | 0.03 | *** |
|  | (0.05-0.06) | (0.08-0.08) | (-0.03--0.02) |  | (0.07-0.08) | (0.04-0.05) | (0.03-0.03) |  |
| Psilocybin | 0.04 | 0.12 | -0.08 | *** | 0.1 | 0.02 | 0.09 | *** |
|  | (0.04-0.04) | (0.12-0.12) | (-0.08--0.08) |  | (0.10-0.11) | (0.01-0.02) | (0.08-0.09) |  |
| DMT | 0 | 0 | 0 | *** | 0 | 0 | 0 | *** |
|  | (0.00-0.00) | (0.00-0.00) | (-0.00--0.00) |  | (0.00-0.00) | (0.00-0.00) | (0.00-0.00) |  |
| Ayahuasca | 0 | 0 | 0 | † | 0 | 0 | 0 | *** |
|  | (0.00-0.00) | (0.00-0.00) | (-0.00-0.00) |  | (0.00-0.00) | (0.00-0.00) | (0.00-0.00) |  |
| Peyote/Mescaline | 0.02 | 0.05 | -0.03 | *** | 0.05 | 0.02 | 0.03 | *** |
|  | (0.02-0.02) | (0.05-0.06) | (-0.04--0.03) |  | (0.05-0.05) | (0.01-0.02) | (0.03-0.03) |  |
| LSD | 0.05 | 0.13 | -0.08 | *** | 0.11 | 0.03 | 0.08 | *** |
|  | (0.05-0.05) | (0.13-0.13) | (-0.09--0.08) |  | (0.11-0.12) | (0.03-0.04) | (0.08-0.08) |  |
| Classic Psychedelics | 0.07 | 0.17 | -0.1 | *** | 0.15 | 0.04 | 0.11 | *** |
|  | (0.07-0.07) | (0.17-0.18) | (-0.11--0.10) |  | (0.15-0.15) | (0.04-0.05) | (0.10-0.11) |  |
| Women | 0.52 | 0.51 | 0.01 | ** | 0.51 | 0.55 | -0.04 | *** |
|  | (0.52-0.53) | (0.51-0.52) | (0.00-0.01) |  | (0.51-0.52) | (0.54-0.56) | (-0.04--0.03) |  |
| Age | 8.23 | 8.9 | -0.66 | *** | 8.71 | 8.39 | 0.32 | *** |
|  | (8.22-8.25) | (8.88-8.91) | (-0.69--0.64) |  | (8.70-8.72) | (8.36-8.41) | (0.29-0.35) |  |
| Family Income | 4.43 | 5.24 | -0.82 | *** | 5.08 | 4.09 | 0.99 | *** |
|  | (4.40-4.45) | (5.23-5.26) | (-0.84--0.79) |  | (5.06-5.10) | (4.05-4.12) | (0.95-1.03) |  |
| Marital Status | 0.64 | 0.48 | 0.17 | *** | 0.53 | 0.53 | 0 |  |
| Single, never Married | (0.64-0.65) | (0.47-0.48) | (0.16-0.18) |  | (0.53-0.54) | (0.52-0.55) | (-0.01-0.01) |  |
|  |  |  |  |  |  |  |  |  |
| Married | 0.37 | 0.23 | 0.14 | *** | 0.25 | 0.44 | -0.18 | *** |
|  | (0.36-0.37) | (0.23-0.23) | (0.14-0.15) |  | (0.25-0.26) | (0.43-0.45) | (-0.19--0.18) |  |
| Widowed | 0.45 | 0.57 | -0.12 | *** | 0.55 | 0.33 | 0.22 | *** |
|  | (0.44-0.45) | (0.56-0.57) | (-0.12--0.11) |  | (0.55-0.56) | (0.32-0.33) | (0.22-0.23) |  |
| Divorced/Separated | 0.04 | 0.07 | -0.02 | *** | 0.06 | 0.06 | 0 |  |
|  | (0.04-0.05) | (0.07-0.07) | (-0.03--0.02) |  | (0.06-0.06) | (0.06-0.06) | (-0.00-0.00) |  |
| Children | 0.14 | 0.14 | 0 |  | 0.13 | 0.17 | -0.04 | *** |
|  | (0.14-0.14) | (0.14-0.14) | (-0.00-0.00) |  | (0.13-0.14) | (0.17-0.18) | (-0.05--0.03) |  |
| Religiosity | 5.33 | 4.71 | 0.61 | *** | 4.8 | 5.85 | -1.05 | *** |
|  | (5.30-5.35) | (4.70-4.73) | (0.59-0.64) |  | (4.79-4.81) | (5.81-5.89) | (-1.09--1.01) |  |
| Religious Attendance | 1.95 | 1.87 | 0.08 | *** | 1.84 | 2.28 | -0.44 | *** |
|  | (1.93-1.97) | (1.85-1.88) | (0.06-0.10) |  | (1.83-1.85) | (2.25-2.31) | (-0.47--0.41) |  |
| Lifetime Drug Use |  |  |  |  |  |  |  |  |
| Cocaine | 0.11 | 0.19 | -0.07 | *** | 0.17 | 0.11 | 0.06 | *** |
|  | (0.11-0.12) | (0.18-0.19) | (-0.08--0.07) |  | (0.17-0.17) | (0.10-0.11) | (0.06-0.07) |  |
| Marijuana | 0.37 | 0.51 | -0.14 | *** | 0.47 | 0.45 | 0.02 | *** |
|  | (0.37-0.37) | (0.51-0.52) | (-0.15--0.14) |  | (0.46-0.47) | (0.44-0.45) | (0.01-0.03) |  |
| PCP | 0.02 | 0.03 | -0.01 | *** | 0.03 | 0.02 | 0 | † |
|  | (0.02-0.02) | (0.03-0.03) | (-0.01--0.01) |  | (0.03-0.03) | (0.02-0.03) | (0.00-0.00) |  |
| Inhalants | 0.05 | 0.11 | -0.06 | *** | 0.1 | 0.03 | 0.06 | *** |
|  | (0.05-0.05) | (0.11-0.11) | (-0.06--0.05) |  | (0.09-0.10) | (0.03-0.03) | (0.06-0.07) |  |
| Stimulants | 0.06 | 0.12 | -0.07 | *** | 0.11 | 0.04 | 0.07 | *** |
|  | (0.06-0.06) | (0.12-0.13) | (-0.07--0.07) |  | (0.11-0.11) | (0.04-0.05) | (0.06-0.07) |  |
| Sedatives | 0.05 | 0.1 | -0.06 | *** | 0.09 | 0.04 | 0.04 | *** |
|  | (0.04-0.05) | (0.10-0.10) | (-0.06--0.05) |  | (0.09-0.09) | (0.04-0.05) | (0.04-0.05) |  |
| Tranquilizer | 0.1 | 0.2 | -0.1 | *** | 0.17 | 0.09 | 0.08 | *** |
|  | (0.10-0.10) | (0.20-0.20) | (-0.10--0.10) |  | (0.17-0.18) | (0.09-0.09) | (0.08-0.09) |  |
| Heroine | 0.02 | 0.02 | -0.01 | *** | 0.02 | 0.02 | 0 | ** |
|  | (0.01-0.02) | (0.02-0.02) | (-0.01--0.01) |  | (0.02-0.02) | (0.02-0.02) | (0.00-0.01) |  |
| Pain Relievers | 0.28 | 0.4 | -0.12 | *** | 0.37 | 0.3 | 0.07 | *** |
|  | (0.28-0.29) | (0.40-0.40) | (-0.12--0.11) |  | (0.37-0.37) | (0.29-0.30) | (0.07-0.08) |  |
| Tobacco | 0.42 | 0.65 | -0.23 | *** | 0.59 | 0.46 | 0.13 | *** |
|  | (0.42-0.42) | (0.65-0.66) | (-0.24--0.23) |  | (0.59-0.59) | (0.45-0.47) | (0.12-0.13) |  |
| Age of First Alcohol Use | 3.23 | 2.69 | 0.54 | *** | 2.83 | 3.23 | -0.4 | *** |
|  | (3.22-3.24) | (2.69-2.70) | (0.52-0.55) |  | (2.82-2.83) | (3.22-3.25) | (-0.42--0.39) |  |
| Thrill Seeking Behavior | 1.48 | 1.71 | -0.23 | *** | 1.66 | 1.42 | 0.24 | *** |
|  | (1.47-1.48) | (1.70-1.71) | (-0.24--0.23) |  | (1.65-1.66) | (1.41-1.42) | (0.23-0.25) |  |
| Source: 2008-2019 National Survey of Drug Use and Health, n=*484,732*  a. Calculated with T-Tests  b. Standard deviations in parentheses.  †p < 0.10, *p < 0.05, **p < 0.01, ***p < 0.001 (two-tailed) | | | | | | | | |

| **Supplemental Table 3.** Mean and Proportion Differences of Dependent, Independent, and Control Variables by being Hispanic vs Not Being Hispanic and Being Asian vs Not Being Asian (Weighted) | | | | | | | | |
| --- | --- | --- | --- | --- | --- | --- | --- | --- |
|  | Not Hispanic | Hispanic | Not Hispanic (-) Hispanic | | Not Asian | Asian | Not Asian (-) Asian | |
| Psychological Distress in Last Month (K6) | 9.52 | 10.04 | -0.52 | *** | 9.61 | 9.15 | 0.46 | *** |
|  | (9.47–9.58) | (9.90–10.17) | (-0.66––0.37) |  | (9.56–9.66) | (8.93–9.37) | (0.24–0.68) |  |
| Educational Attainment | 2.84 | 2.23 | 0.61 | *** | 2.72 | 3.35 | -0.63 | *** |
|  | (2.84–2.85) | (2.22–2.24) | (0.60–0.63) |  | (2.71–2.73) | (3.32–3.37) | (-0.66––0.60) |  |
| Health Insurance |  |  |  |  |  |  |  |  |
| Uninsured | 0.1 | 0.28 | -0.18 | *** | 0.13 | 0.1 | 0.04 | *** |
|  | (0.10–0.11) | (0.28–0.29) | (-0.18––0.17) |  | (0.13–0.13) | (0.09–0.10) | (0.03–0.04) |  |
| Private | 0.7 | 0.46 | 0.24 | *** | 0.66 | 0.75 | -0.09 | *** |
|  | (0.70–0.70) | (0.45–0.47) | (0.23–0.25) |  | (0.66–0.66) | (0.74–0.76) | (-0.10––0.08) |  |
| Public | 0.33 | 0.28 | 0.06 | *** | 0.33 | 0.2 | 0.13 | *** |
|  | (0.33–0.34) | (0.27–0.28) | (0.05–0.06) |  | (0.33–0.33) | (0.19–0.22) | (0.12–0.14) |  |
| Other | 0.02 | 0.03 | -0.01 | *** | 0.02 | 0.03 | -0.01 | *** |
|  | (0.02–0.02) | (0.03–0.03) | (-0.01––0.01) |  | (0.02–0.02) | (0.02–0.03) | (-0.01––0.00) |  |
| Lifetime Psychedelic Use |  |  |  |  |  |  |  |  |
| MDMA | 0.07 | 0.06 | 0.01 | *** | 0.07 | 0.04 | 0.03 | *** |
|  | (0.07–0.07) | (0.06–0.06) | (0.01–0.02) |  | (0.07–0.07) | (0.04–0.05) | (0.02–0.03) |  |
| Psilocybin | 0.1 | 0.05 | 0.05 | *** | 0.1 | 0.03 | 0.07 | *** |
|  | (0.10–0.10) | (0.05–0.05) | (0.05–0.05) |  | (0.10–0.10) | (0.03–0.03) | (0.06–0.07) |  |
| DMT | 0 | 0 | 0 | *** | 0 | 0 | 0 | *** |
|  | (0.00–0.00) | (0.00–0.00) | (0.00–0.00) |  | (0.00–0.00) | (0.00–0.00) | (0.00–0.00) |  |
| Ayahuasca | 0 | 0 | 0 |  | 0 | 0 | 0 |  |
|  | (0.00–0.00) | (0.00–0.00) | (0.00–0.00) |  | (0.00–0.00) | (0.00–0.00) | (0.00–0.00) |  |
| Peyote/Mescaline | 0.05 | 0.02 | 0.03 | *** | 0.04 | 0.01 | 0.04 | *** |
|  | (0.05–0.05) | (0.02–0.02) | (0.02–0.03) |  | (0.04–0.05) | (0.01–0.01) | (0.04–0.05) |  |
| LSD | 0.11 | 0.06 | 0.06 | *** | 0.11 | 0.03 | 0.08 | *** |
|  | (0.11–0.11) | (0.05–0.06) | (0.05–0.06) |  | (0.11–0.11) | (0.03–0.03) | (0.08–0.09) |  |
| Classic Psychedelics | 0.15 | 0.08 | 0.07 | *** | 0.14 | 0.04 | 0.1 | *** |
|  | (0.15–0.15) | (0.08–0.08) | (0.06–0.07) |  | (0.14–0.14) | (0.04–0.05) | (0.10–0.11) |  |
| Women | 0.52 | 0.5 | 0.02 | *** | 0.52 | 0.53 | -0.01 | ** |
|  | (0.52–0.52) | (0.49–0.50) | (0.02–0.03) |  | (0.51–0.52) | (0.52–0.54) | (-0.03––0.00) |  |
| Age | 8.78 | 8.05 | 0.73 | *** | 8.69 | 8.38 | 0.3 | *** |
|  | (8.77–8.79) | (8.02–8.08) | (0.70–0.76) |  | (8.67–8.70) | (8.34–8.43) | (0.25–0.35) |  |
| Family Income | 5.07 | 4.34 | 0.73 | *** | 4.94 | 5.47 | -0.53 | *** |
|  | (5.06–5.09) | (4.31–4.37) | (0.70–0.76) |  | (4.92–4.95) | (5.41–5.52) | (-0.59––0.48) |  |
| Marital Status | 0.49 | 0.77 | -0.28 | *** | 0.53 | 0.6 | -0.06 | *** |
| Single, never Married | (0.49–0.50) | (0.76–0.78) | (-0.29––0.26) | *** | (0.53–0.54) | (0.57–0.62) | (-0.09––0.04) | *** |
|  |  |  |  |  |  |  |  |  |
| Married | 0.26 | 0.35 | -0.08 | *** | 0.28 | 0.27 | 0 |  |
|  | (0.26–0.27) | (0.34–0.35) | (-0.09––0.08) |  | (0.27–0.28) | (0.27–0.28) | (-0.01–0.01) |  |
| Widowed | 0.53 | 0.49 | 0.04 | *** | 0.52 | 0.63 | -0.11 | *** |
|  | (0.53–0.54) | (0.48–0.49) | (0.04–0.05) |  | (0.52–0.53) | (0.61–0.64) | (-0.12––0.10) |  |
| Divorced/Separated | 0.06 | 0.03 | 0.03 | *** | 0.06 | 0.03 | 0.03 | *** |
|  | (0.06–0.07) | (0.03–0.04) | (0.03–0.03) |  | (0.06–0.06) | (0.03–0.04) | (0.02–0.04) |  |
| Children | 0.14 | 0.13 | 0.01 | *** | 0.14 | 0.07 | 0.08 | *** |
|  | (0.14–0.14) | (0.13–0.14) | (0.00–0.01) |  | (0.14–0.14) | (0.06–0.07) | (0.07–0.09) |  |
| Religiosity | 4.9 | 5.08 | -0.18 | *** | 4.92 | 5.06 | -0.15 | *** |
|  | (4.88–4.91) | (5.04–5.11) | (-0.22––0.14) |  | (4.90–4.93) | (5.00–5.13) | (-0.22––0.08) |  |
| Religious Attendance | 1.91 | 1.78 | 0.13 | *** | 1.9 | 1.82 | 0.07 | ** |
|  | (1.90–1.93) | (1.76–1.81) | (0.11–0.16) |  | (1.89–1.91) | (1.78–1.87) | (0.02–0.12) |  |
| Lifetime Drug Use |  |  |  |  |  |  |  |  |
| Cocaine | 0.17 | 0.13 | 0.04 | *** | 0.17 | 0.04 | 0.12 | *** |
|  | (0.17–0.17) | (0.13–0.13) | (0.03–0.04) |  | (0.17–0.17) | (0.04–0.05) | (0.12–0.13) |  |
| Marijuana | 0.49 | 0.34 | 0.15 | *** | 0.48 | 0.19 | 0.28 | *** |
|  | (0.48–0.49) | (0.34–0.35) | (0.14–0.15) |  | (0.48–0.48) | (0.18–0.20) | (0.27–0.30) |  |
| PCP | 0.03 | 0.02 | 0.01 | *** | 0.03 | 0 | 0.02 | *** |
|  | (0.03–0.03) | (0.01–0.02) | (0.01–0.01) |  | (0.03–0.03) | (0.00–0.01) | (0.02–0.02) |  |
| Inhalants | 0.09 | 0.06 | 0.03 | *** | 0.09 | 0.03 | 0.06 | *** |
|  | (0.09–0.09) | (0.06–0.06) | (0.03–0.03) |  | (0.09–0.09) | (0.03–0.04) | (0.05–0.06) |  |
| Stimulants | 0.11 | 0.06 | 0.05 | *** | 0.1 | 0.04 | 0.07 | *** |
|  | (0.11–0.11) | (0.06–0.06) | (0.04–0.05) |  | (0.10–0.10) | (0.03–0.04) | (0.06–0.07) |  |
| Sedatives | 0.09 | 0.05 | 0.04 | *** | 0.09 | 0.03 | 0.05 | *** |
|  | (0.09–0.09) | (0.04–0.05) | (0.04–0.05) |  | (0.09–0.09) | (0.03–0.04) | (0.05–0.05) |  |
| Tranquilizer | 0.17 | 0.11 | 0.07 | *** | 0.17 | 0.06 | 0.11 | *** |
|  | (0.17–0.18) | (0.10–0.11) | (0.06–0.07) |  | (0.17–0.17) | (0.06–0.06) | (0.11–0.12) |  |
| Heroine | 0.02 | 0.01 | 0.01 | *** | 0.02 | 0 | 0.02 | *** |
|  | (0.02–0.02) | (0.01–0.02) | (0.01–0.01) |  | (0.02–0.02) | (0.00–0.01) | (0.01–0.02) |  |
| Pain Relievers | 0.37 | 0.28 | 0.1 | *** | 0.37 | 0.21 | 0.16 | *** |
|  | (0.37–0.38) | (0.27–0.28) | (0.09–0.10) |  | (0.37–0.37) | (0.20–0.22) | (0.15–0.16) |  |
| Tobacco | 0.6 | 0.4 | 0.2 | *** | 0.59 | 0.27 | 0.31 | *** |
|  | (0.60–0.61) | (0.40–0.41) | (0.19–0.21) |  | (0.59–0.59) | (0.27–0.28) | (0.31–0.32) |  |
| Age of First Alcohol Use | 2.83 | 3.13 | -0.3 | *** | 2.83 | 3.68 | -0.84 | *** |
|  | (2.82–2.84) | (3.12–3.15) | (-0.32––0.29) |  | (2.83–2.84) | (3.65–3.70) | (-0.87––0.82) |  |
| Thrill Seeking Behavior | 1.65 | 1.49 | 0.16 | *** | 1.64 | 1.47 | 0.17 | *** |
|  | (1.65–1.66) | (1.48–1.50) | (0.16–0.17) |  | (1.63–1.64) | (1.45–1.48) | (0.15–0.18) |  |
| Source: 2008-2019 National Survey of Drug Use and Health, n=*484,732*  a. Calculated with T-Tests  b. Standard deviations in parentheses.  †p < 0.10, *p < 0.05, **p < 0.01, ***p < 0.001 (two-tailed) | | | | | | | | |

| **Supplemental Table 4.** Mean and Proportion Differences of Dependent, Independent, and Control Variables by being Native Alaskan / Native (NI/AN) Indian vs NI/AN and Being Native Hawaiian or Pacific Islander (NHOPI) vs Not Being NHOPI (Weighted) | | | | | | | | |
| --- | --- | --- | --- | --- | --- | --- | --- | --- |
|  | Not NI/AN | NI/AN | Not NI/AN (-)NI/AN | | Not NHOPI | NHOPI | Not NHOPI (-)NHOPI | |
| Psychological Distress in Last Month (K6) | 9.58 | 11.36 | -1.78 | *** | 9.59 | 10.01 | -0.42 |  |
|  | (9.53–9.63) | (10.84–11.88) | (-2.31––1.26) |  | (9.54–9.64) | (9.24–10.78) | (-1.19–0.34) |  |
| Educational Attainment | 2.75 | 2.3 | 0.45 | *** | 2.75 | 2.58 | 0.17 | *** |
|  | (2.75–2.76) | (2.25–2.36) | (0.40–0.51) |  | (2.75–2.76) | (2.50–2.66) | (0.10–0.25) |  |
| Health Insurance |  |  |  |  |  |  |  |  |
| Uninsured | 0.13 | 0.12 | 0.01 |  | 0.13 | 0.16 | -0.03 | * |
|  | (0.13–0.13) | (0.10–0.14) | (-0.00–0.03) |  | (0.13–0.13) | (0.13–0.19) | (-0.05––0.00) |  |
| Private | 0.67 | 0.38 | 0.29 | *** | 0.66 | 0.59 | 0.07 | *** |
|  | (0.66–0.67) | (0.35–0.40) | (0.26–0.31) |  | (0.66–0.67) | (0.56–0.62) | (0.04–0.10) |  |
| Public | 0.32 | 0.43 | -0.1 | *** | 0.33 | 0.32 | 0.01 |  |
|  | (0.32–0.33) | (0.40–0.45) | (-0.13––0.07) |  | (0.32–0.33) | (0.28–0.36) | (-0.03–0.04) |  |
| Other | 0.02 | 0.15 | -0.13 | *** | 0.02 | 0.03 | -0.01 | * |
|  | (0.02–0.02) | (0.13–0.16) | (-0.15––0.11) |  | (0.02–0.02) | (0.02–0.04) | (-0.02–0.00) |  |
| Lifetime Psychedelic Use |  |  |  |  |  |  |  |  |
| MDMA | 0.07 | 0.07 | 0 |  | 0.07 | 0.08 | -0.01 |  |
|  | (0.07–0.07) | (0.06–0.08) | (-0.01–0.01) |  | (0.07–0.07) | (0.06–0.09) | (-0.02–0.01) |  |
| Psilocybin | 0.09 | 0.11 | -0.01 |  | 0.09 | 0.06 | 0.04 | *** |
|  | (0.09–0.09) | (0.09–0.12) | (-0.03–0.00) |  | (0.09–0.10) | (0.04–0.07) | (0.02–0.05) |  |
| DMT | 0 | 0 | 0 |  | 0 | 0 | 0 | *** |
|  | (0.00–0.00) | (0.00–0.00) | (-0.00–0.00) |  | (0.00–0.00) | (0.00–0.00) | (0.00–0.00) |  |
| Ayahuasca | 0 | 0 | 0 | *** | 0 | 0 | 0 | *** |
|  | (0.00–0.00) | (0.00–0.00) | (0.00–0.00) |  | (0.00–0.00) | (0.00–0.00) | (0.00–0.00) |  |
| Peyote/Mescaline | 0.04 | 0.14 | -0.1 | *** | 0.04 | 0.02 | 0.02 | *** |
|  | (0.04–0.04) | (0.12–0.17) | (-0.13––0.08) |  | (0.04–0.04) | (0.01–0.03) | (0.01–0.03) |  |
| LSD | 0.1 | 0.11 | -0.01 |  | 0.1 | 0.07 | 0.04 | *** |
|  | (0.10–0.11) | (0.10–0.13) | (-0.02–0.00) |  | (0.10–0.11) | (0.05–0.09) | (0.02–0.06) |  |
| Classic Psychedelics | 0.14 | 0.24 | -0.1 | *** | 0.14 | 0.09 | 0.05 | *** |
|  | (0.14–0.14) | (0.21–0.27) | (-0.13––0.07) |  | (0.14–0.14) | (0.06–0.11) | (0.03–0.07) |  |
| Women | 0.52 | 0.54 | -0.02 |  | 0.52 | 0.51 | 0 |  |
|  | (0.52–0.52) | (0.52–0.57) | (-0.05–0.00) |  | (0.52–0.52) | (0.47–0.56) | (-0.04–0.04) |  |
| Age | 8.67 | 8.41 | 0.26 | *** | 8.67 | 8.29 | 0.38 | *** |
|  | (8.66–8.68) | (8.30–8.53) | (0.14–0.38) |  | (8.66–8.68) | (8.14–8.44) | (0.23–0.53) |  |
| Family Income | 4.97 | 3.82 | 1.15 | *** | 4.96 | 4.68 | 0.28 | *** |
|  | (4.95–5.00) | (3.72–3.92) | (1.05–1.25) |  | (4.95–4.98) | (4.55–4.81) | (0.15–0.42) |  |
| Marital Status | 0.53 | 0.59 | -0.05 | *** | 0.53 | 0.71 | -0.17 | *** |
| Single, never Married | (0.53–0.54) | (0.55–0.63) | (-0.09––0.01) | *** | (0.53–0.54) | (0.63–0.78) | (-0.25––0.10) | *** |
|  |  |  |  |  |  |  |  |  |
| Married | 0.28 | 0.36 | -0.08 | *** | 0.28 | 0.34 | -0.06 | *** |
|  | (0.27–0.28) | (0.34–0.38) | (-0.11––0.06) |  | (0.27–0.28) | (0.31–0.37) | (-0.09––0.03) |  |
| Widowed | 0.53 | 0.38 | 0.15 | *** | 0.53 | 0.5 | 0.03 |  |
|  | (0.52–0.53) | (0.36–0.40) | (0.12–0.17) |  | (0.52–0.53) | (0.46–0.54) | (-0.01–0.06) |  |
| Divorced/Separated | 0.06 | 0.07 | -0.01 |  | 0.06 | 0.03 | 0.03 | ** |
|  | (0.06–0.06) | (0.05–0.09) | (-0.03–0.01) |  | (0.06–0.06) | (0.02–0.05) | (0.01–0.04) |  |
| Children | 0.14 | 0.19 | -0.05 | *** | 0.14 | 0.13 | 0.01 |  |
|  | (0.14–0.14) | (0.17–0.21) | (-0.07––0.03) |  | (0.14–0.14) | (0.10–0.15) | (-0.01–0.04) |  |
| Religiosity | 4.92 | 5.19 | -0.27 | *** | 4.92 | 5.5 | -0.58 | *** |
|  | (4.91–4.93) | (5.07–5.32) | (-0.40––0.15) |  | (4.91–4.93) | (5.28–5.71) | (-0.79––0.36) |  |
| Religious Attendance | 1.9 | 1.55 | 0.34 | *** | 1.89 | 2.03 | -0.13 |  |
|  | (1.89–1.91) | (1.48–1.63) | (0.27–0.42) |  | (1.88–1.90) | (1.87–2.18) | (-0.29–0.03) |  |
| Lifetime Drug Use |  |  |  |  |  |  |  |  |
| Cocaine | 0.16 | 0.21 | -0.04 | *** | 0.16 | 0.11 | 0.05 | *** |
|  | (0.16–0.16) | (0.19–0.23) | (-0.06––0.02) |  | (0.16–0.16) | (0.09–0.13) | (0.03–0.07) |  |
| Marijuana | 0.46 | 0.55 | -0.09 | *** | 0.46 | 0.42 | 0.04 | * |
|  | (0.46–0.47) | (0.52–0.58) | (-0.11––0.06) |  | (0.46–0.47) | (0.39–0.46) | (0.01–0.08) |  |
| PCP | 0.03 | 0.03 | -0.01 | * | 0.03 | 0.01 | 0.01 | ** |
|  | (0.03–0.03) | (0.03–0.04) | (-0.02––0.00) |  | (0.03–0.03) | (0.01–0.02) | (0.00–0.02) |  |
| Inhalants | 0.09 | 0.11 | -0.02 | *** | 0.09 | 0.07 | 0.02 | ** |
|  | (0.09–0.09) | (0.10–0.12) | (-0.04––0.01) |  | (0.09–0.09) | (0.05–0.08) | (0.01–0.03) |  |
| Stimulants | 0.1 | 0.12 | -0.02 | * | 0.1 | 0.06 | 0.04 | *** |
|  | (0.10–0.10) | (0.11–0.14) | (-0.04––0.00) |  | (0.10–0.10) | (0.05–0.07) | (0.03–0.05) |  |
| Sedatives | 0.08 | 0.09 | -0.01 |  | 0.08 | 0.04 | 0.04 | *** |
|  | (0.08–0.08) | (0.08–0.11) | (-0.03–0.00) |  | (0.08–0.08) | (0.03–0.05) | (0.03–0.06) |  |
| Tranquilizer | 0.16 | 0.15 | 0.01 |  | 0.16 | 0.09 | 0.07 | *** |
|  | (0.16–0.17) | (0.14–0.17) | (-0.00–0.03) |  | (0.16–0.17) | (0.07–0.11) | (0.05–0.09) |  |
| Heroine | 0.02 | 0.03 | -0.01 | ** | 0.02 | 0.01 | 0.01 |  |
|  | (0.02–0.02) | (0.02–0.04) | (-0.02––0.00) |  | (0.02–0.02) | (0.01–0.02) | (-0.01–0.01) |  |
| Pain Relievers | 0.36 | 0.38 | -0.02 |  | 0.36 | 0.32 | 0.04 | ** |
|  | (0.36–0.36) | (0.36–0.41) | (-0.05–0.00) |  | (0.36–0.36) | (0.29–0.35) | (0.01–0.07) |  |
| Tobacco | 0.57 | 0.66 | -0.09 | *** | 0.57 | 0.5 | 0.07 | *** |
|  | (0.57–0.57) | (0.64–0.69) | (-0.12––0.07) |  | (0.57–0.58) | (0.46–0.54) | (0.04–0.11) |  |
| Age of First Alcohol Use | 2.88 | 2.85 | 0.02 |  | 2.87 | 3.3 | -0.42 | *** |
|  | (2.87–2.88) | (2.78–2.93) | (-0.05–0.10) |  | (2.87–2.88) | (3.21–3.39) | (-0.51––0.33) |  |
| Thrill Seeking Behavior | 1.63 | 1.62 | 0.01 |  | 1.63 | 1.58 | 0.05 |  |
|  | (1.63–1.63) | (1.58–1.65) | (-0.02–0.05) |  | (1.63–1.63) | (1.53–1.63) | (-0.01–0.10) |  |
| Source: 2008-2019 National Survey of Drug Use and Health, n=*484,732*  a. Calculated with T-Tests  b. Standard deviations in parentheses.  †p < 0.10, *p < 0.05, **p < 0.01, ***p < 0.001 (two-tailed) | | | | | | | | |

Supplemental Table 5. Weighted Multivariate Ordinary Least Square Regression Predicting Psychological Distress Among the Total Population

|  | Total |  |  |  |
| --- | --- | --- | --- | --- |
|  | Model 1 | Model 2 | Model 3 | Model 4 |
| Age | -0.555*** | -0.570*** | -0.552*** | -0.568*** |
|  | (0.0111) | (0.0110) | (0.0113) | (0.0112) |
|  |  |  |  |  |
| Education | -0.418*** | -0.327*** | -0.414*** | -0.323*** |
|  | (0.0250) | (0.0254) | (0.0253) | (0.0257) |
|  |  |  |  |  |
| Family Income | -0.365*** | -0.277*** | -0.366*** | -0.278*** |
|  | (0.0128) | (0.0134) | (0.0128) | (0.0134) |
|  |  |  |  |  |
| aWomen | 0.926*** | 0.934*** | 0.917*** | 0.924*** |
|  | (0.0485) | (0.0483) | (0.0480) | (0.0478) |
|  |  |  |  |  |
| bMarried | -0.402*** | -0.333*** | -0.404*** | -0.335*** |
|  | (0.0620) | (0.0609) | (0.0622) | (0.0612) |
|  |  |  |  |  |
| Widowed | -0.451*** | -0.412*** | -0.453*** | -0.415*** |
|  | (0.120) | (0.121) | (0.121) | (0.121) |
|  |  |  |  |  |
| Divorced | 0.473*** | 0.464*** | 0.472*** | 0.463*** |
|  | (0.0899) | (0.0887) | (0.0903) | (0.0890) |
|  |  |  |  |  |
| cBlack | -0.424*** | -0.514*** | -0.428*** | -0.518*** |
|  | (0.0709) | (0.0699) | (0.0705) | (0.0697) |
|  |  |  |  |  |
| Hispanic | -0.00177 | -0.122 | -0.00303 | -0.123 |
|  | (0.0784) | (0.0787) | (0.0785) | (0.0788) |
|  |  |  |  |  |
| Asian | 0.314** | 0.299** | 0.313** | 0.298** |
|  | (0.0996) | (0.0983) | (0.0997) | (0.0984) |
|  |  |  |  |  |
| dNI/AN | 0.782** | 0.677* | 0.816** | 0.714** |
|  | (0.260) | (0.261) | (0.262) | (0.262) |
|  |  |  |  |  |
| eNHOPI | 0.275 | 0.169 | 0.272 | 0.166 |
|  | (0.432) | (0.433) | (0.432) | (0.433) |
|  |  |  |  |  |
| Multi-Race/Other | 0.320* | 0.241 | 0.331* | 0.252 |
|  | (0.158) | (0.157) | (0.157) | (0.156) |
|  |  |  |  |  |
| Religious Salience | -0.0425*** | -0.0477*** | -0.0429*** | -0.0482*** |
|  | (0.0114) | (0.0112) | (0.0114) | (0.0112) |
|  |  |  |  |  |
| Religious Attendance | -0.125*** | -0.115*** | -0.126*** | -0.116*** |
|  | (0.0150) | (0.0150) | (0.0151) | (0.0150) |
|  |  |  |  |  |
| Cocaine | -0.0640 | -0.0845 | -0.0451 | -0.0650 |
|  | (0.0689) | (0.0685) | (0.0701) | (0.0698) |
|  |  |  |  |  |
| Stimulant | 0.611*** | 0.629*** | 0.619*** | 0.637*** |
|  | (0.0692) | (0.0690) | (0.0692) | (0.0690) |
|  |  |  |  |  |
| Sedative | 0.878*** | 0.862*** | 0.897*** | 0.882*** |
|  | (0.0723) | (0.0721) | (0.0726) | (0.0725) |
|  |  |  |  |  |
| Tranquilizer | 1.062*** | 1.039*** | 1.061*** | 1.038*** |
|  | (0.0545) | (0.0550) | (0.0546) | (0.0550) |
|  |  |  |  |  |
| Heroine | 0.693*** | 0.586*** | 0.724*** | 0.618*** |
|  | (0.149) | (0.147) | (0.147) | (0.145) |
|  |  |  |  |  |
| Pain Killers | 0.369*** | 0.353*** | 0.371*** | 0.355*** |
|  | (0.0633) | (0.0636) | (0.0633) | (0.0637) |
|  |  |  |  |  |
| Marijuana | 0.409*** | 0.419*** | 0.405*** | 0.415*** |
|  | (0.0699) | (0.0693) | (0.0700) | (0.0695) |
|  |  |  |  |  |
| PCP | -0.0332 | -0.0634 | 0.0578 | 0.0314 |
|  | (0.183) | (0.180) | (0.181) | (0.179) |
|  |  |  |  |  |
| Inhalants | 0.542*** | 0.538*** | 0.563*** | 0.559*** |
|  | (0.0747) | (0.0743) | (0.0746) | (0.0743) |
|  |  |  |  |  |
| Tobacco | 0.449*** | 0.418*** | 0.445*** | 0.414*** |
|  | (0.0548) | (0.0549) | (0.0548) | (0.0549) |
|  |  |  |  |  |
| Age of 1st Alcohol Use | -0.0268 | -0.0350 | -0.0266 | -0.0348 |
|  | (0.0282) | (0.0281) | (0.0281) | (0.0280) |
|  |  |  |  |  |
| Risky Behaviors | 0.655*** | 0.661*** | 0.657*** | 0.662*** |
|  | (0.0310) | (0.0308) | (0.0310) | (0.0308) |
|  |  |  |  |  |
| f2009 | -0.0305 | -0.0474 | -0.0294 | -0.0461 |
|  | (0.120) | (0.121) | (0.121) | (0.121) |
|  |  |  |  |  |
| 2010 | 0.0593 | 0.0323 | 0.0603 | 0.0334 |
|  | (0.117) | (0.118) | (0.117) | (0.118) |
|  |  |  |  |  |
| 2011 | 0.0691 | 0.0336 | 0.0717 | 0.0362 |
|  | (0.116) | (0.117) | (0.116) | (0.117) |
|  |  |  |  |  |
| 2012 | 0.168 | 0.137 | 0.171 | 0.139 |
|  | (0.118) | (0.118) | (0.119) | (0.119) |
|  |  |  |  |  |
| 2013 | 0.290* | 0.259† | 0.291* | 0.260† |
|  | (0.142) | (0.143) | (0.142) | (0.142) |
|  |  |  |  |  |
| 2014 | 0.104 | 0.0659 | 0.101 | 0.0629 |
|  | (0.104) | (0.105) | (0.104) | (0.105) |
|  |  |  |  |  |
| 2015 | -0.318** | -0.345** | -0.320** | -0.347** |
|  | (0.118) | (0.119) | (0.118) | (0.119) |
|  |  |  |  |  |
| 2016 | -0.204† | -0.227* | -0.208† | -0.231* |
|  | (0.112) | (0.113) | (0.113) | (0.113) |
|  |  |  |  |  |
| 2017 | -0.0562 | -0.0920 | -0.0626 | -0.0987 |
|  | (0.118) | (0.120) | (0.118) | (0.119) |
|  |  |  |  |  |
| 2018 | 0.240† | 0.204 | 0.234† | 0.198 |
|  | (0.123) | (0.124) | (0.122) | (0.123) |
|  |  |  |  |  |
| 2019 | 0.567*** | 0.515*** | 0.559*** | 0.507*** |
|  | (0.127) | (0.128) | (0.126) | (0.128) |
|  |  |  |  |  |
| MDMA | 0.188* | 0.160† | 0.184* | 0.154† |
|  | (0.0845) | (0.0834) | (0.0851) | (0.0841) |
|  |  |  |  |  |
| LCPU | -0.173* | -0.165* |  |  |
|  | (0.0664) | (0.0659) |  |  |
|  |  |  |  |  |
| Priv Hlth Ins |  | -0.989*** |  | -0.991*** |
|  |  | (0.0630) |  | (0.0629) |
|  |  |  |  |  |
| Pub Hlth Ins |  | 0.170** |  | 0.170** |
|  |  | (0.0581) |  | (0.0582) |
|  |  |  |  |  |
| Oth Hlth Ins |  | -0.616*** |  | -0.618*** |
|  |  | (0.147) |  | (0.146) |
|  |  |  |  |  |
| Psilocybin |  |  | -0.278** | -0.268** |
|  |  |  | (0.0851) | (0.0846) |
|  |  |  |  |  |
| DMT |  |  | 0.565 | 0.552 |
|  |  |  | (0.597) | (0.588) |
|  |  |  |  |  |
| Ayahuasca |  |  | 1.333 | 1.271 |
|  |  |  | (1.704) | (1.702) |
|  |  |  |  |  |
| Peyote/Mescaline |  |  | -0.447*** | -0.464*** |
|  |  |  | (0.126) | (0.125) |
|  |  |  |  |  |
| LSD |  |  | 0.126 | 0.133 |
|  |  |  | (0.0827) | (0.0828) |
|  |  |  |  |  |
| Constant | 18.27*** | 18.49*** | 18.23*** | 18.46*** |
|  | (0.227) | (0.223) | (0.230) | (0.227) |
| Observations | 149002 | 149002 | 149002 | 149002 |
| *R*2 | 0.148 | 0.152 | 0.148 | 0.153 |

Standard errors in parentheses

Source: 2008-2019 National Survey of Drug Use and Health, n=458,372

aMen serve as the references category for Women

bSingle Serves as the reference category for Marital Statuses

cWhite, Non-Hispanic Serves as the reference category for race/ethnicity

dNI/AN = Native Indian or Alaskan Native

e NHOPI = Native Hawaiian or Pacific Islander

f2008 serves as the reference category for the year survey was taken

† *p* < .10, * *p* < .05, ** *p* < .01, *** *p* < .001

Supplemental Table 6. Weighted Multivariate Ordinary Least Square Regression Predicting Psychological Distress Among the Total Population and By Whites, Blacks, and Hispanics

|  | White |  |  |  | Black |  |  |  | Hispanic |  |  |  |
| --- | --- | --- | --- | --- | --- | --- | --- | --- | --- | --- | --- | --- |
|  | Model 1 | Model 2 | Model 3 | Model 4 | Model 5 | Model 6 | Model 7 | Model 8 | Model 9 | Model 10 | Model 11 | Model 12 |
| Age | -0.619*** | -0.635*** | -0.616*** | -0.632*** | -0.509*** | -0.516*** | -0.505*** | -0.513*** | -0.368*** | -0.383*** | -0.369*** | -0.383*** |
|  | (0.0144) | (0.0151) | (0.0145) | (0.0153) | (0.0302) | (0.0291) | (0.0301) | (0.0290) | (0.0347) | (0.0346) | (0.0347) | (0.0347) |
|  |  |  |  |  |  |  |  |  |  |  |  |  |
| Education | -0.438*** | -0.343*** | -0.431*** | -0.336*** | -0.348*** | -0.261*** | -0.356*** | -0.268*** | -0.339*** | -0.284** | -0.336*** | -0.281** |
|  | (0.0279) | (0.0279) | (0.0284) | (0.0284) | (0.0681) | (0.0695) | (0.0687) | (0.0698) | (0.0840) | (0.0866) | (0.0834) | (0.0861) |
|  |  |  |  |  |  |  |  |  |  |  |  |  |
| Family Income | -0.374*** | -0.281*** | -0.375*** | -0.282*** | -0.411*** | -0.309*** | -0.413*** | -0.309*** | -0.355*** | -0.291*** | -0.354*** | -0.292*** |
|  | (0.0171) | (0.0175) | (0.0170) | (0.0175) | (0.0305) | (0.0340) | (0.0305) | (0.0341) | (0.0385) | (0.0426) | (0.0385) | (0.0427) |
|  |  |  |  |  |  |  |  |  |  |  |  |  |
| aWomen | 0.949*** | 0.964*** | 0.935*** | 0.949*** | 0.711*** | 0.702*** | 0.728*** | 0.719*** | 1.039*** | 0.996*** | 1.032*** | 0.989*** |
|  | (0.0582) | (0.0584) | (0.0577) | (0.0577) | (0.149) | (0.150) | (0.148) | (0.149) | (0.144) | (0.143) | (0.144) | (0.144) |
|  |  |  |  |  |  |  |  |  |  |  |  |  |
| bMarried | -0.309*** | -0.236** | -0.314*** | -0.240** | -0.167 | -0.122 | -0.170 | -0.125 | -0.715*** | -0.668*** | -0.709*** | -0.663*** |
|  | (0.0735) | (0.0735) | (0.0735) | (0.0736) | (0.179) | (0.176) | (0.178) | (0.175) | (0.191) | (0.190) | (0.191) | (0.189) |
|  |  |  |  |  |  |  |  |  |  |  |  |  |
| Widowed | -0.453*** | -0.376** | -0.458*** | -0.381** | -0.320 | -0.302 | -0.337 | -0.320 | 0.0172 | -0.134 | 0.0274 | -0.122 |
|  | (0.132) | (0.134) | (0.132) | (0.134) | (0.384) | (0.398) | (0.383) | (0.397) | (0.538) | (0.543) | (0.540) | (0.544) |
|  |  |  |  |  |  |  |  |  |  |  |  |  |
| Divorced | 0.698*** | 0.670*** | 0.692*** | 0.664*** | 0.0886 | 0.112 | 0.0940 | 0.118 | -0.0290 | -0.0475 | -0.0313 | -0.0493 |
|  | (0.107) | (0.106) | (0.108) | (0.107) | (0.216) | (0.217) | (0.215) | (0.217) | (0.253) | (0.253) | (0.254) | (0.253) |
|  |  |  |  |  |  |  |  |  |  |  |  |  |
| Religious Salience | -0.0406** | -0.0464*** | -0.0413** | -0.0471*** | -0.0899** | -0.0928** | -0.0859** | -0.0887** | -0.0346 | -0.0377 | -0.0364 | -0.0394 |
|  | (0.0131) | (0.0130) | (0.0130) | (0.0130) | (0.0325) | (0.0321) | (0.0324) | (0.0320) | (0.0310) | (0.0310) | (0.0310) | (0.0310) |
|  |  |  |  |  |  |  |  |  |  |  |  |  |
| Religious Attendance | -0.123*** | -0.110*** | -0.123*** | -0.111*** | -0.196*** | -0.185*** | -0.191*** | -0.180*** | -0.118** | -0.115** | -0.120** | -0.117** |
|  | (0.0193) | (0.0191) | (0.0193) | (0.0191) | (0.0413) | (0.0417) | (0.0413) | (0.0417) | (0.0424) | (0.0426) | (0.0422) | (0.0424) |
|  |  |  |  |  |  |  |  |  |  |  | (0.0422) | (0.0424) |
| Cocaine | -0.0591 | -0.0820 | -0.0374 | -0.0598 | 0.00471 | -0.0416 | -0.0665 | -0.109 | -0.177 | -0.181 | -0.117 | -0.123 |
|  | (0.0820) | (0.0813) | (0.0818) | (0.0810) | (0.243) | (0.241) | (0.240) | (0.238) | (0.212) | (0.209) | (0.216) | (0.213) |
|  |  |  |  |  |  |  |  |  |  |  |  |  |
| Stimulant | 0.540*** | 0.553*** | 0.549*** | 0.563*** | 0.717* | 0.741* | 0.670* | 0.696* | 1.018*** | 1.054*** | 1.049*** | 1.083*** |
|  | (0.0794) | (0.0789) | (0.0793) | (0.0786) | (0.297) | (0.294) | (0.297) | (0.294) | (0.228) | (0.228) | (0.229) | (0.229) |
|  |  |  |  |  |  |  |  |  |  |  |  |  |
| Sedative | 0.863*** | 0.854*** | 0.882*** | 0.874*** | 0.936*** | 0.876*** | 0.983*** | 0.922*** | 1.081** | 1.044** | 1.082** | 1.045** |
|  | (0.0815) | (0.0810) | (0.0819) | (0.0814) | (0.214) | (0.219) | (0.214) | (0.219) | (0.323) | (0.326) | (0.322) | (0.325) |
|  |  |  |  |  |  |  |  |  |  |  |  |  |
| Tranquilizer | 1.043*** | 1.018*** | 1.042*** | 1.016*** | 1.010*** | 0.994*** | 0.977*** | 0.961*** | 1.372*** | 1.349*** | 1.382*** | 1.358*** |
|  | (0.0678) | (0.0675) | (0.0680) | (0.0677) | (0.201) | (0.200) | (0.200) | (0.199) | (0.188) | (0.188) | (0.187) | (0.188) |
|  |  |  |  |  |  |  |  |  |  |  |  |  |
| Heroine | 0.903*** | 0.766*** | 0.932*** | 0.795*** | 0.231 | 0.243 | 0.346 | 0.368 | 0.131 | 0.0344 | 0.128 | 0.0339 |
|  | (0.171) | (0.168) | (0.168) | (0.166) | (0.625) | (0.609) | (0.624) | (0.606) | (0.478) | (0.487) | (0.479) | (0.488) |
|  |  |  |  |  |  |  |  |  |  |  |  |  |
| Pain Killers | 0.329*** | 0.299*** | 0.333*** | 0.303*** | 0.483** | 0.475* | 0.483** | 0.474* | 0.463** | 0.457** | 0.466** | 0.460** |
|  | (0.0699) | (0.0703) | (0.0699) | (0.0703) | (0.183) | (0.182) | (0.183) | (0.182) | (0.152) | (0.153) | (0.152) | (0.154) |
|  |  |  |  |  |  |  |  |  |  |  |  |  |
| Marijuana | 0.524*** | 0.526*** | 0.519*** | 0.521*** | -0.0349 | -0.0233 | -0.0318 | -0.0191 | 0.122 | 0.122 | 0.124 | 0.124 |
|  | (0.0753) | (0.0750) | (0.0751) | (0.0747) | (0.166) | (0.165) | (0.167) | (0.166) | (0.194) | (0.194) | (0.193) | (0.192) |
|  |  |  |  |  |  |  |  |  |  |  |  |  |
| PCP | -0.0703 | -0.0938 | 0.0465 | 0.0261 | 0.156 | -0.0198 | 0.237 | 0.0756 | 0.189 | 0.139 | 0.267 | 0.216 |
|  | (0.202) | (0.200) | (0.203) | (0.201) | (0.627) | (0.617) | (0.607) | (0.600) | (0.596) | (0.603) | (0.598) | (0.603) |
|  |  |  |  |  |  |  |  |  |  |  |  |  |
| Inhalants | 0.576*** | 0.566*** | 0.595*** | 0.585*** | 0.538† | 0.562† | 0.491 | 0.516† | 0.593* | 0.607* | 0.653* | 0.664** |
|  | (0.0853) | (0.0858) | (0.0848) | (0.0853) | (0.314) | (0.306) | (0.310) | (0.302) | (0.258) | (0.259) | (0.250) | (0.251) |
|  |  |  |  |  |  |  |  |  |  |  |  |  |
| Tobacco | 0.353*** | 0.319*** | 0.350*** | 0.315*** | 0.825*** | 0.790*** | 0.821*** | 0.785*** | 0.630*** | 0.607*** | 0.632*** | 0.609*** |
|  | (0.0657) | (0.0665) | (0.0653) | (0.0661) | (0.151) | (0.150) | (0.151) | (0.150) | (0.171) | (0.171) | (0.171) | (0.171) |
|  |  |  |  |  |  |  |  |  |  |  |  |  |
| Age of 1st Alcohol Use | -0.00795 | -0.0138 | -0.00711 | -0.0130 | -0.0218 | -0.0370 | -0.0224 | -0.0379 | -0.108 | -0.116 | -0.108 | -0.115 |
|  | (0.0317) | (0.0318) | (0.0316) | (0.0317) | (0.0664) | (0.0664) | (0.0663) | (0.0664) | (0.0758) | (0.0756) | (0.0758) | (0.0756) |
|  |  |  |  |  |  |  |  |  |  |  |  |  |
| Risky Behaviors | 0.579*** | 0.586*** | 0.581*** | 0.588*** | 0.757*** | 0.752*** | 0.747*** | 0.742*** | 0.909*** | 0.904*** | 0.913*** | 0.908*** |
|  | (0.0379) | (0.0376) | (0.0379) | (0.0377) | (0.0966) | (0.0967) | (0.0961) | (0.0963) | (0.112) | (0.111) | (0.112) | (0.111) |
|  |  |  |  |  |  |  |  |  |  |  |  |  |
| f2009 | -0.0831 | -0.0911 | -0.0813 | -0.0893 | -0.0229 | -0.0447 | -0.0344 | -0.0561 | 0.154 | 0.103 | 0.137 | 0.0872 |
|  | (0.145) | (0.145) | (0.146) | (0.146) | (0.275) | (0.274) | (0.281) | (0.280) | (0.413) | (0.415) | (0.413) | (0.414) |
|  |  |  |  |  |  |  |  |  |  |  |  |  |
| 2010 | 0.0495 | 0.0290 | 0.0509 | 0.0306 | 0.331 | 0.253 | 0.331 | 0.252 | -0.0162 | -0.0470 | -0.0247 | -0.0548 |
|  | (0.130) | (0.132) | (0.131) | (0.132) | (0.332) | (0.332) | (0.330) | (0.329) | (0.366) | (0.364) | (0.364) | (0.362) |
|  |  |  |  |  |  |  |  |  |  |  |  |  |
| 2011 | 0.0672 | 0.0446 | 0.0703 | 0.0478 | 0.344 | 0.258 | 0.344 | 0.259 | -0.470 | -0.527 | -0.476 | -0.532 |
|  | (0.142) | (0.139) | (0.143) | (0.140) | (0.382) | (0.384) | (0.380) | (0.382) | (0.375) | (0.374) | (0.376) | (0.376) |
|  |  |  |  |  |  |  |  |  |  |  |  |  |
| 2012 | 0.0518 | 0.0379 | 0.0561 | 0.0424 | 1.086** | 0.981** | 1.080** | 0.976** | -0.0775 | -0.117 | -0.0983 | -0.136 |
|  | (0.137) | (0.135) | (0.138) | (0.136) | (0.329) | (0.329) | (0.327) | (0.327) | (0.396) | (0.394) | (0.396) | (0.393) |
|  |  |  |  |  |  |  |  |  |  |  |  |  |
| 2013 | 0.225 | 0.206 | 0.225 | 0.207 | 0.412 | 0.334 | 0.398 | 0.318 | 0.514 | 0.450 | 0.503 | 0.440 |
|  | (0.176) | (0.176) | (0.176) | (0.176) | (0.341) | (0.339) | (0.341) | (0.339) | (0.367) | (0.367) | (0.369) | (0.368) |
|  |  |  |  |  |  |  |  |  |  |  |  |  |
| 2014 | 0.0670 | 0.0338 | 0.0661 | 0.0330 | 0.535† | 0.479 | 0.522† | 0.465 | -0.0466 | -0.131 | -0.0509 | -0.134 |
|  | (0.127) | (0.127) | (0.127) | (0.127) | (0.302) | (0.304) | (0.303) | (0.306) | (0.292) | (0.291) | (0.293) | (0.291) |
|  |  |  |  |  |  |  |  |  |  |  |  |  |
| 2015 | -0.440** | -0.446** | -0.441** | -0.448** | -0.183 | -0.252 | -0.181 | -0.251 | -0.0697 | -0.152 | -0.0792 | -0.161 |
|  | (0.148) | (0.147) | (0.147) | (0.147) | (0.306) | (0.308) | (0.306) | (0.308) | (0.317) | (0.317) | (0.317) | (0.317) |
|  |  |  |  |  |  |  |  |  |  |  |  |  |
| 2016 | -0.222† | -0.220† | -0.229† | -0.227† | -0.0696 | -0.148 | -0.0855 | -0.165 | -0.0561 | -0.147 | -0.0683 | -0.158 |
|  | (0.133) | (0.133) | (0.133) | (0.133) | (0.285) | (0.284) | (0.284) | (0.283) | (0.318) | (0.318) | (0.317) | (0.317) |
|  |  |  |  |  |  |  |  |  |  |  |  |  |
| 2017 | -0.130 | -0.155 | -0.139 | -0.164 | 0.475 | 0.406 | 0.458 | 0.388 | -0.286 | -0.364 | -0.289 | -0.366 |
|  | (0.144) | (0.145) | (0.144) | (0.145) | (0.301) | (0.302) | (0.302) | (0.302) | (0.345) | (0.349) | (0.345) | (0.349) |
|  |  |  |  |  |  |  |  |  |  |  |  |  |
| 2018 | 0.139 | 0.126 | 0.133 | 0.119 | 0.740* | 0.634† | 0.719* | 0.612† | 0.318 | 0.207 | 0.304 | 0.194 |
|  | (0.143) | (0.144) | (0.144) | (0.145) | (0.347) | (0.348) | (0.349) | (0.350) | (0.350) | (0.359) | (0.349) | (0.358) |
|  |  |  |  |  |  |  |  |  |  |  |  |  |
| 2019 | 0.410** | 0.371** | 0.400** | 0.361* | 1.145*** | 1.062** | 1.108*** | 1.023** | 0.810* | 0.697* | 0.797* | 0.685* |
|  | (0.138) | (0.138) | (0.138) | (0.138) | (0.318) | (0.320) | (0.319) | (0.321) | (0.337) | (0.342) | (0.337) | (0.342) |
|  |  |  |  |  |  |  |  |  |  |  |  |  |
| MDMA | 0.0603 | 0.0359 | 0.0489 | 0.0238 | 0.580† | 0.531† | 0.344 | 0.294 | 0.0573 | 0.0409 | 0.215 | 0.190 |
|  | (0.0976) | (0.0971) | (0.101) | (0.1000) | (0.294) | (0.290) | (0.298) | (0.295) | (0.237) | (0.239) | (0.236) | (0.239) |
|  |  |  |  |  |  |  |  |  |  |  |  |  |
| LCPU | -0.147† | -0.146† |  |  | -0.493 | -0.450 |  |  | -0.0839 | -0.0713 |  |  |
|  | (0.0796) | (0.0795) |  |  | (0.343) | (0.335) |  |  | (0.313) | (0.311) |  |  |
|  |  |  |  |  |  |  |  |  |  |  |  |  |
| Priv Hlth Ins |  | -1.166*** |  | -1.167*** |  | -0.884*** |  | -0.890*** |  | -0.303 |  | -0.300 |
|  |  | (0.0799) |  | (0.0796) |  | (0.170) |  | (0.169) |  | (0.188) |  | (0.188) |
|  |  |  |  |  |  |  |  |  |  |  |  |  |
| Pub Hlth Ins |  | 0.0856 |  | 0.0865 |  | 0.319* |  | 0.326* |  | 0.638*** |  | 0.631*** |
|  |  | (0.0784) |  | (0.0789) |  | (0.110) |  | (0.119) |  | (0.177) |  | (0.177) |
|  |  |  |  |  |  |  |  |  |  |  |  |  |
| Oth Hlth Ins |  | -0.932*** |  | -0.931*** |  | -0.468 |  | -0.501 |  | 0.225 |  | 0.227 |
|  |  | (0.195) |  | (0.194) |  | (0.433) |  | (0.439) |  | (0.464) |  | (0.464) |
|  |  |  |  |  |  |  |  |  |  |  |  |  |
| Psilocybin |  |  | -0.346*** | -0.345*** |  |  | 1.559*** | 1.608*** |  |  | -0.517† | -0.483† |
|  |  |  | (0.0970) | (0.0968) |  |  | (0.459) | (0.454) |  |  | (0.285) | (0.281) |
|  |  |  |  |  |  |  |  |  |  |  |  |  |
| DMT |  |  | 0.490 | 0.461 |  |  | -2.305 | -2.399 |  |  | -0.119 | -0.0901 |
|  |  |  | (0.625) | (0.609) |  |  | (6.563) | (6.521) |  |  | (1.948) | (1.931) |
|  |  |  |  |  |  |  |  |  |  |  |  |  |
| Ayahuasca |  |  | 0.243 | 0.117 |  |  |  |  |  |  | 2.703 | 2.700 |
|  |  |  | (1.955) | (1.966) |  |  |  |  |  |  | (5.761) | (5.718) |
|  |  |  |  |  |  |  |  |  |  |  |  |  |
| Peyote/Mescaline |  |  | -0.535*** | -0.547*** |  |  | -1.090* | -1.084* |  |  | 0.482 | 0.449 |
|  |  |  | (0.148) | (0.146) |  |  | (0.542) | (0.534) |  |  | (0.422) | (0.422) |
|  |  |  |  |  |  |  |  |  |  |  |  |  |
| LSD |  |  | 0.270* | 0.273** |  |  | -0.363 | -0.371 |  |  | -0.267 | -0.250 |
|  |  |  | (0.104) | (0.103) |  |  | (0.422) | (0.419) |  |  | (0.366) | (0.365) |
|  |  |  |  |  |  |  |  |  |  |  |  |  |
| Constant | 19.38*** | 19.73*** | 19.33*** | 19.68*** | 17.26*** | 17.19*** | 17.22*** | 17.16*** | 15.25*** | 15.13*** | 15.26*** | 15.15*** |
|  | (0.258) | (0.261) | (0.261) | (0.265) | (0.624) | (0.629) | (0.620) | (0.624) | (0.663) | (0.664) | (0.663) | (0.664) |
| Observations | 97184 | 97184 | 97184 | 97184 | 16823 | 16823 | 16823 | 16823 | 21113 | 21113 | 21113 | 21113 |
| *R*2 | 0.159 | 0.165 | 0.160 | 0.166 | 0.129 | 0.135 | 0.131 | 0.136 | 0.121 | 0.123 | 0.121 | 0.124 |

Standard errors in parentheses

Source: 2008-2019 National Survey of Drug Use and Health, n=458,372

aMen serve as the references category for Women

bSingle Serves as the reference category for Marital Statuses

cWhite, Non-Hispanic Serves as the reference category for race/ethnicity

dNI/AN = Native Indian or Alaskan Native

e NHOPI = Native Hawaiian or Pacific Islander

f2008 serves as the reference category for the year survey was taken

† *p* < .10, * *p* < .05, ** *p* < .01, *** *p* < .001

Supplemental Table 7. Weighted Multivariate Ordinary Least Square Regression Predicting Psychological Distress Among the Total Population and Asians, NHOPI, and NI/AN

|  | Asian |  |  |  | NHOPI |  |  |  | NI/AN |  |  |  |
| --- | --- | --- | --- | --- | --- | --- | --- | --- | --- | --- | --- | --- |
|  | Model 1 | Model 2 | Model 3 | Model 4 | Model 5 | Model 6 | Model 7 | Model 9 | Model 9 | Model 10 | Model 11 | Model 12 |
| Age | -0.371*** | -0.367*** | -0.372*** | -0.368*** | -0.160 | -0.205 | -0.139 | -0.189 | -0.542*** | -0.566*** | -0.515*** | -0.538*** |
|  | (0.0687) | (0.0660) | (0.0685) | (0.0657) | (0.164) | (0.175) | (0.164) | (0.174) | (0.120) | (0.123) | (0.125) | (0.128) |
|  |  |  |  |  |  |  |  |  |  |  |  |  |
| Education | -0.229 | -0.141 | -0.236 | -0.148 | 0.457 | 0.413 | 0.404 | 0.399 | -0.728** | -0.637* | -0.715* | -0.629* |
|  | (0.155) | (0.151) | (0.152) | (0.149) | (0.287) | (0.327) | (0.292) | (0.335) | (0.273) | (0.287) | (0.273) | (0.287) |
|  |  |  |  |  |  |  |  |  |  |  |  |  |
| Family Income | -0.192** | -0.135* | -0.189** | -0.131* | -0.0683 | -0.113 | -0.0647 | -0.0928 | -0.435*** | -0.362** | -0.429*** | -0.364** |
|  | (0.0571) | (0.0600) | (0.0569) | (0.0596) | (0.142) | (0.135) | (0.146) | (0.140) | (0.127) | (0.115) | (0.124) | (0.110) |
|  |  |  |  |  |  |  |  |  |  |  |  |  |
| aWomen | 0.593** | 0.632** | 0.609** | 0.650** | 0.917 | 0.644 | 0.661 | 0.380 | 0.900† | 0.903† | 0.915† | 0.916† |
|  | (0.217) | (0.211) | (0.217) | (0.210) | (0.603) | (0.590) | (0.611) | (0.604) | (0.533) | (0.537) | (0.533) | (0.536) |
|  |  |  |  |  |  |  |  |  |  |  |  |  |
| bMarried | -1.523*** | -1.442*** | -1.512*** | -1.430*** | -1.779* | -1.841* | -1.908* | -1.997* | 0.407 | 0.436 | 0.447 | 0.468 |
|  | (0.356) | (0.346) | (0.353) | (0.343) | (0.866) | (0.876) | (0.856) | (0.863) | (0.591) | (0.574) | (0.601) | (0.582) |
|  |  |  |  |  |  |  |  |  |  |  |  |  |
| Widowed | -0.176 | -0.198 | -0.171 | -0.196 | -3.725* | -4.210* | -3.745* | -4.223* | -0.891 | -0.982 | -1.059 | -1.155 |
|  | (0.899) | (0.909) | (0.901) | (0.912) | (1.780) | (1.600) | (1.778) | (1.606) | (1.030) | (1.014) | (1.010) | (0.994) |
|  |  |  |  |  |  |  |  |  |  |  |  |  |
| Divorced | -1.424* | -1.498** | -1.385* | -1.455** | -2.065* | -1.988* | -2.091* | -1.988* | 2.272** | 2.282** | 2.179** | 2.184** |
|  | (0.548) | (0.528) | (0.553) | (0.532) | (0.924) | (0.926) | (0.913) | (0.912) | (0.752) | (0.744) | (0.762) | (0.756) |
|  |  |  |  |  |  |  |  |  |  |  |  |  |
| Religious Salience | 0.0289 | 0.0159 | 0.0304 | 0.0173 | -0.0317 | -0.0247 | -0.0541 | -0.0472 | -0.0930 | -0.0954 | -0.120 | -0.125 |
|  | (0.0404) | (0.0400) | (0.0410) | (0.0406) | (0.113) | (0.112) | (0.112) | (0.111) | (0.108) | (0.107) | (0.106) | (0.104) |
|  |  |  |  |  |  |  |  |  |  |  |  |  |
| Religious Attendance | -0.0626 | -0.0562 | -0.0660 | -0.0593 | -0.175 | -0.186 | -0.170 | -0.182 | 0.125 | 0.129 | 0.129 | 0.135 |
|  | (0.0620) | (0.0614) | (0.0621) | (0.0615) | (0.184) | (0.181) | (0.186) | (0.184) | (0.156) | (0.155) | (0.154) | (0.154) |
|  |  |  |  |  |  |  |  |  |  |  |  |  |
| Cocaine | 0.661 | 0.681 | 0.670 | 0.693 | 1.791 | 1.658 | 2.151* | 1.988* | 0.558 | 0.591 | 0.545 | 0.576 |
|  | (0.502) | (0.498) | (0.513) | (0.509) | (1.181) | (1.126) | (1.015) | (0.950) | (0.592) | (0.587) | (0.599) | (0.590) |
|  |  |  |  |  |  |  |  |  |  |  |  |  |
| Stimulant | 0.203 | 0.165 | 0.212 | 0.170 | 0.626 | 0.578 | 0.880 | 0.800 | 0.576 | 0.627 | 0.735 | 0.792 |
|  | (0.370) | (0.363) | (0.367) | (0.361) | (0.942) | (0.957) | (0.940) | (0.937) | (0.748) | (0.710) | (0.730) | (0.687) |
|  |  |  |  |  |  |  |  |  |  |  |  |  |
| Sedative | 1.373* | 1.382* | 1.368* | 1.383* | 1.453 | 1.341 | 1.247 | 1.072 | 0.790 | 0.845 | 0.602 | 0.655 |
|  | (0.625) | (0.621) | (0.629) | (0.621) | (1.188) | (1.303) | (1.214) | (1.332) | (0.695) | (0.714) | (0.691) | (0.710) |
|  |  |  |  |  |  |  |  |  |  |  |  |  |
| Tranquilizer | 0.535 | 0.567 | 0.513 | 0.542 | 1.159 | 1.262 | 1.623 | 1.743 | 0.484 | 0.461 | 0.631 | 0.602 |
|  | (0.412) | (0.406) | (0.404) | (0.399) | (1.272) | (1.289) | (1.211) | (1.226) | (0.567) | (0.551) | (0.566) | (0.549) |
|  |  |  |  |  |  |  |  |  |  |  |  |  |
| Heroine | -2.595 | -2.672 | -2.588 | -2.648 | 0.400 | 0.493 | 1.128 | 1.316 | 0.819 | 0.628 | 0.513 | 0.330 |
|  | (1.997) | (1.933) | (2.017) | (1.962) | (2.529) | (2.526) | (2.596) | (2.603) | (1.011) | (1.007) | (1.004) | (1.005) |
|  |  |  |  |  |  |  |  |  |  |  |  |  |
| Pain Killers | 0.461† | 0.455† | 0.443† | 0.437† | 0.253 | 0.216 | 0.144 | 0.0958 | 0.178 | 0.143 | 0.169 | 0.131 |
|  | (0.241) | (0.244) | (0.239) | (0.242) | (0.595) | (0.601) | (0.593) | (0.595) | (0.556) | (0.546) | (0.547) | (0.539) |
|  |  |  |  |  |  |  |  |  |  |  |  |  |
| Marijuana | 0.303 | 0.315 | 0.327 | 0.339 | 1.667* | 1.709* | 1.550* | 1.615* | -0.634 | -0.644 | -0.634 | -0.636 |
|  | (0.281) | (0.278) | (0.284) | (0.280) | (0.741) | (0.737) | (0.749) | (0.747) | (0.598) | (0.594) | (0.604) | (0.599) |
|  |  |  |  |  |  |  |  |  |  |  |  |  |
| PCP | -0.338 | -0.122 | -0.191 | 0.0442 | -4.903** | -5.226*** | -4.611** | -4.990*** | -0.198 | -0.0387 | 0.746 | 0.893 |
|  | (1.256) | (1.206) | (1.262) | (1.222) | (1.472) | (1.439) | (1.425) | (1.411) | (0.993) | (0.978) | (1.029) | (1.005) |
|  |  |  |  |  |  |  |  |  |  |  |  |  |
| Inhalants | 0.687† | 0.700† | 0.686† | 0.698† | -2.865*** | -2.905*** | -2.578*** | -2.601*** | 0.00971 | -0.0214 | 0.0544 | 0.0137 |
|  | (0.377) | (0.373) | (0.388) | (0.385) | (0.683) | (0.692) | (0.639) | (0.648) | (0.617) | (0.602) | (0.622) | (0.607) |
|  |  |  |  |  |  |  |  |  |  |  |  |  |
| Tobacco | 0.390 | 0.367 | 0.397 | 0.372 | 0.116 | 0.134 | 0.0379 | 0.0257 | 0.848 | 0.792 | 0.918† | 0.868 |
|  | (0.280) | (0.277) | (0.278) | (0.274) | (0.696) | (0.705) | (0.703) | (0.707) | (0.530) | (0.538) | (0.527) | (0.534) |
|  |  |  |  |  |  |  |  |  |  |  |  |  |
| Age of 1st Alcohol Use | 0.00363 | 0.00596 | 0.00557 | 0.00772 | 0.201 | 0.249 | 0.162 | 0.204 | 0.0386 | 0.0159 | 0.0545 | 0.0368 |
|  | (0.113) | (0.113) | (0.114) | (0.113) | (0.407) | (0.407) | (0.407) | (0.406) | (0.282) | (0.286) | (0.284) | (0.287) |
|  |  |  |  |  |  |  |  |  |  |  |  |  |
| Risky Behaviors | 0.660*** | 0.686*** | 0.663*** | 0.689*** | 0.761* | 0.700* | 0.795* | 0.734* | 1.098*** | 1.128*** | 1.161*** | 1.190*** |
|  | (0.164) | (0.160) | (0.164) | (0.160) | (0.343) | (0.341) | (0.340) | (0.342) | (0.289) | (0.288) | (0.281) | (0.280) |
|  |  |  |  |  |  |  |  |  |  |  |  |  |
| c2009 | -0.612 | -0.659 | -0.605 | -0.658 | 0.434 | 0.464 | 0.0793 | 0.0358 | 2.025* | 2.035* | 2.118* | 2.125* |
|  | (0.483) | (0.475) | (0.482) | (0.472) | (1.963) | (1.957) | (1.936) | (1.954) | (0.925) | (0.882) | (0.934) | (0.882) |
|  |  |  |  |  |  |  |  |  |  |  |  |  |
| 2010 | -1.059† | -1.135† | -1.052† | -1.133† | 0.234 | 0.205 | 0.315 | 0.260 | 2.559† | 2.681* | 2.754* | 2.870* |
|  | (0.600) | (0.596) | (0.605) | (0.603) | (1.455) | (1.485) | (1.450) | (1.485) | (1.356) | (1.301) | (1.367) | (1.310) |
|  |  |  |  |  |  |  |  |  |  |  |  |  |
| 2011 | -0.0512 | -0.188 | -0.0568 | -0.201 | 2.448 | 2.583 | 2.599 | 2.650 | 5.207** | 5.069** | 5.188** | 5.052** |
|  | (0.565) | (0.567) | (0.577) | (0.581) | (1.947) | (1.965) | (1.940) | (1.964) | (1.545) | (1.528) | (1.542) | (1.518) |
|  |  |  |  |  |  |  |  |  |  |  |  |  |
| 2012 | -0.134 | -0.271 | -0.170 | -0.315 | 0.916 | 1.201 | 0.871 | 1.132 | 3.038** | 2.944** | 3.083** | 2.984** |
|  | (0.530) | (0.535) | (0.554) | (0.563) | (1.383) | (1.345) | (1.374) | (1.343) | (0.929) | (0.881) | (0.961) | (0.905) |
|  |  |  |  |  |  |  |  |  |  |  |  |  |
| 2013 | -0.165 | -0.224 | -0.161 | -0.225 | -0.584 | -0.423 | -0.804 | -0.736 | 2.840* | 2.862* | 2.762* | 2.788* |
|  | (0.596) | (0.596) | (0.608) | (0.611) | (1.465) | (1.437) | (1.471) | (1.441) | (1.227) | (1.203) | (1.245) | (1.216) |
|  |  |  |  |  |  |  |  |  |  |  |  |  |
| 2014 | -0.737 | -0.801 | -0.729 | -0.797 | 1.111 | 1.032 | 1.115 | 0.986 | 1.380 | 1.325 | 1.367 | 1.312 |
|  | (0.487) | (0.488) | (0.491) | (0.493) | (1.572) | (1.541) | (1.562) | (1.526) | (1.165) | (1.129) | (1.163) | (1.120) |
|  |  |  |  |  |  |  |  |  |  |  |  |  |
| 2015 | -0.0905 | -0.166 | -0.0648 | -0.145 | 1.494 | 1.422 | 1.459 | 1.387 | 1.749† | 1.594 | 1.738† | 1.591 |
|  | (0.551) | (0.549) | (0.555) | (0.555) | (1.521) | (1.515) | (1.524) | (1.515) | (0.986) | (0.962) | (1.007) | (0.972) |
|  |  |  |  |  |  |  |  |  |  |  |  |  |
| 2016 | -1.261* | -1.297* | -1.248* | -1.290* | 0.678 | 0.596 | 0.549 | 0.379 | 2.300* | 2.236* | 2.403* | 2.336* |
|  | (0.525) | (0.524) | (0.526) | (0.525) | (1.417) | (1.383) | (1.419) | (1.386) | (0.956) | (0.927) | (0.980) | (0.945) |
|  |  |  |  |  |  |  |  |  |  |  |  |  |
| 2017 | -0.354 | -0.365 | -0.336 | -0.351 | 2.373 | 2.148 | 2.477† | 2.213 | 2.914* | 2.870* | 2.977* | 2.935* |
|  | (0.497) | (0.499) | (0.494) | (0.497) | (1.452) | (1.433) | (1.466) | (1.441) | (1.180) | (1.157) | (1.230) | (1.201) |
|  |  |  |  |  |  |  |  |  |  |  |  |  |
| 2018 | -0.491 | -0.568 | -0.470 | -0.554 | 2.462† | 2.483† | 2.086 | 2.102 | 3.130** | 3.053** | 3.190** | 3.111** |
|  | (0.506) | (0.503) | (0.510) | (0.509) | (1.464) | (1.446) | (1.427) | (1.412) | (1.152) | (1.122) | (1.174) | (1.140) |
|  |  |  |  |  |  |  |  |  |  |  |  |  |
| 2019 | -0.0371 | -0.112 | -0.0199 | -0.100 | -0.192 | -0.322 | -0.397 | -0.539 | 3.633** | 3.661** | 3.448** | 3.470** |
|  | (0.547) | (0.546) | (0.547) | (0.547) | (1.460) | (1.418) | (1.482) | (1.446) | (1.235) | (1.226) | (1.265) | (1.248) |
|  |  |  |  |  |  |  |  |  |  |  |  |  |
| MDMA | -0.241 | -0.305 | -0.268 | -0.341 | 0.290 | 0.312 | 0.183 | 0.140 | 2.316** | 2.382** | 2.374** | 2.419** |
|  | (0.485) | (0.488) | (0.493) | (0.499) | (0.846) | (0.861) | (0.734) | (0.730) | (0.852) | (0.841) | (0.822) | (0.811) |
|  |  |  |  |  |  |  |  |  |  |  |  |  |
| Psilocybin |  |  | 0.587 | 0.602 |  |  | 1.705 | 2.118* |  |  | 1.082 | 1.074 |
|  |  |  | (0.730) | (0.727) |  |  | (1.030) | (1.004) |  |  | (0.725) | (0.711) |
|  |  |  |  |  |  |  |  |  |  |  |  |  |
| DMT |  |  | 8.540** | 8.965** |  |  |  |  |  |  | -3.099 | -3.033 |
|  |  |  | (2.715) | (2.740) |  |  |  |  |  |  | (2.062) | (2.082) |
|  |  |  |  |  |  |  |  |  |  |  |  |  |
| Ayahuasca |  |  | -3.469*** | -3.056*** |  |  |  |  |  |  |  |  |
|  |  |  | (0.754) | (0.747) |  |  |  |  |  |  |  |  |
|  |  |  |  |  |  |  |  |  |  |  |  |  |
| Peyote/Mescaline |  |  | 0.0448 | -0.0499 |  |  | -5.139** | -5.141** |  |  | 0.181 | 0.137 |
|  |  |  | (0.987) | (1.029) |  |  | (1.743) | (1.708) |  |  | (0.588) | (0.586) |
|  |  |  |  |  |  |  |  |  |  |  |  |  |
| LSD |  |  | 0.0361 | -0.00677 |  |  | -3.220** | -3.219** |  |  | -2.329** | -2.349** |
|  |  |  | (0.751) | (0.746) |  |  | (1.109) | (1.093) |  |  | (0.746) | (0.740) |
|  |  |  |  |  |  |  |  |  |  |  |  |  |
| Priv Hlth Ins |  | -1.125*** |  | -1.143*** |  | 0.926 |  | 0.734 |  | -0.182 |  | -0.0717 |
|  |  | (0.280) |  | (0.282) |  | (0.753) |  | (0.770) |  | (0.551) |  | (0.557) |
|  |  |  |  |  |  |  |  |  |  |  |  |  |
| Pub Hlth Ins |  | -0.173 |  | -0.165 |  | 1.067 |  | 1.155 |  | 0.892 |  | 0.922 |
|  |  | (0.296) |  | (0.293) |  | (0.796) |  | (0.793) |  | (0.640) |  | (0.639) |
|  |  |  |  |  |  |  |  |  |  |  |  |  |
| Oth Hlth Ins |  | -0.231 |  | -0.239 |  | -1.720 |  | -1.909 |  | 0.634 |  | 0.710 |
|  |  | (0.494) |  | (0.502) |  | (2.329) |  | (2.342) |  | (0.785) |  | (0.788) |
|  |  |  |  |  |  |  |  |  |  |  |  |  |
| LCPU | 0.612 | 0.570 |  |  | -1.392 | -1.117 |  |  | -0.429 | -0.501 |  |  |
|  | (0.600) | (0.609) |  |  | (1.120) | (1.061) |  |  | (0.555) | (0.541) |  |  |
|  |  |  |  |  |  |  |  |  |  |  |  |  |
| _cons | 15.30*** | 15.55*** | 15.29*** | 15.55*** | 8.517** | 8.801* | 8.834** | 9.178** | 15.96*** | 15.51*** | 15.39*** | 14.90*** |
|  | (0.912) | (0.944) | (0.919) | (0.952) | (3.196) | (3.341) | (3.140) | (3.291) | (2.055) | (2.100) | (2.081) | (2.125) |
| Observations | 5886 | 5886 | 5886 | 5886 | 630 | 630 | 630 | 630 | 2065 | 2065 | 2065 | 2065 |
| *R*2 | 0.146 | 0.151 | 0.147 | 0.153 | 0.210 | 0.218 | 0.232 | 0.240 | 0.197 | 0.201 | 0.206 | 0.210 |

Standard errors in parentheses

Source: 2008-2019 National Survey of Drug Use and Health, n=484,732

aMen serve as the references category for Women

bSingle Serves as the reference category for Marital Statuses

c2008 serves as the reference category for the year survey was taken

† *p* < .10, * *p* < .05, ** *p* < .01, *** *p* < .001

Supplemental Table 8. Weighted Multivariate Ordinary Least Square Regression Predicting Psychological Distress Among The Total Population with Private Health Insurance Interaction Terms

|  | Model 1 | Model 2 | Model 3 | Model 4 | Model 5 | Model 6 | Model 7 | Model 8 | Model 9 | Model 10 | Model 11 | Model 12 | Model 13 | Model 14 |
| --- | --- | --- | --- | --- | --- | --- | --- | --- | --- | --- | --- | --- | --- | --- |
| Age | -0.571*** | -0.568*** | -0.568*** | -0.568*** | -0.568*** | -0.568*** | -0.569*** | -0.570*** | -0.567*** | -0.569*** | -0.568*** | -0.568*** | -0.568*** | -0.568*** |
|  | (0.0110) | (0.0112) | (0.0112) | (0.0112) | (0.0112) | (0.0112) | (0.0112) | (0.0111) | (0.0112) | (0.0112) | (0.0112) | (0.0112) | (0.0113) | (0.0112) |
|  |  |  |  |  |  |  |  |  |  |  |  |  |  |  |
| Education | -0.328*** | -0.323*** | -0.323*** | -0.323*** | -0.323*** | -0.323*** | -0.324*** | -0.358*** | -0.368*** | -0.375*** | -0.349*** | -0.351*** | -0.353*** | -0.350*** |
|  | (0.0254) | (0.0257) | (0.0258) | (0.0257) | (0.0257) | (0.0258) | (0.0258) | (0.0424) | (0.0433) | (0.0403) | (0.0387) | (0.0380) | (0.0400) | (0.0407) |
|  |  |  |  |  |  |  |  |  |  |  |  |  |  |  |
| Family Income | -0.277*** | -0.278*** | -0.278*** | -0.278*** | -0.278*** | -0.278*** | -0.277*** | -0.278*** | -0.278*** | -0.278*** | -0.278*** | -0.278*** | -0.278*** | -0.278*** |
|  | (0.0134) | (0.0134) | (0.0133) | (0.0134) | (0.0134) | (0.0133) | (0.0133) | (0.0133) | (0.0134) | (0.0133) | (0.0133) | (0.0134) | (0.0133) | (0.0133) |
|  |  |  |  |  |  |  |  |  |  |  |  |  |  |  |
| aWomen | 0.935*** | 0.924*** | 0.925*** | 0.924*** | 0.924*** | 0.925*** | 0.925*** | 0.936*** | 0.925*** | 0.924*** | 0.924*** | 0.924*** | 0.925*** | 0.927*** |
|  | (0.0484) | (0.0478) | (0.0479) | (0.0478) | (0.0478) | (0.0479) | (0.0479) | (0.0483) | (0.0479) | (0.0478) | (0.0478) | (0.0478) | (0.0479) | (0.0477) |
|  |  |  |  |  |  |  |  |  |  |  |  |  |  |  |
| bMarried | -0.329*** | -0.335*** | -0.333*** | -0.335*** | -0.335*** | -0.335*** | -0.332*** | -0.331*** | -0.336*** | -0.332*** | -0.335*** | -0.336*** | -0.335*** | -0.333*** |
|  | (0.0613) | (0.0612) | (0.0616) | (0.0611) | (0.0612) | (0.0614) | (0.0615) | (0.0616) | (0.0613) | (0.0618) | (0.0611) | (0.0612) | (0.0615) | (0.0618) |
|  |  |  |  |  |  |  |  |  |  |  |  |  |  |  |
| Widowed | -0.405** | -0.415*** | -0.412*** | -0.415*** | -0.415*** | -0.414*** | -0.409** | -0.398** | -0.412*** | -0.409** | -0.414*** | -0.414*** | -0.410*** | -0.402** |
|  | (0.121) | (0.121) | (0.121) | (0.121) | (0.121) | (0.121) | (0.121) | (0.120) | (0.121) | (0.121) | (0.121) | (0.121) | (0.121) | (0.121) |
|  |  |  |  |  |  |  |  |  |  |  |  |  |  |  |
| Divorced | 0.463*** | 0.463*** | 0.463*** | 0.463*** | 0.463*** | 0.463*** | 0.462*** | 0.463*** | 0.463*** | 0.465*** | 0.464*** | 0.464*** | 0.465*** | 0.463*** |
|  | (0.0887) | (0.0891) | (0.0891) | (0.0890) | (0.0890) | (0.0891) | (0.0890) | (0.0888) | (0.0890) | (0.0892) | (0.0890) | (0.0890) | (0.0891) | (0.0892) |
|  |  |  |  |  |  |  |  |  |  |  |  |  |  |  |
| cBlack | -0.501*** | -0.518*** | -0.510*** | -0.518*** | -0.518*** | -0.517*** | -0.510*** | -0.498*** | -0.519*** | -0.511*** | -0.519*** | -0.518*** | -0.517*** | -0.506*** |
|  | (0.0696) | (0.0698) | (0.0697) | (0.0697) | (0.0697) | (0.0695) | (0.0693) | (0.0700) | (0.0700) | (0.0698) | (0.0698) | (0.0697) | (0.0696) | (0.0696) |
|  |  |  |  |  |  |  |  |  |  |  |  |  |  |  |
| Hispanic | -0.112 | -0.123 | -0.117 | -0.123 | -0.123 | -0.122 | -0.116 | -0.111 | -0.126 | -0.121 | -0.126 | -0.125 | -0.124 | -0.114 |
|  | (0.0789) | (0.0789) | (0.0788) | (0.0789) | (0.0788) | (0.0788) | (0.0792) | (0.0787) | (0.0787) | (0.0784) | (0.0786) | (0.0785) | (0.0785) | (0.0790) |
|  |  |  |  |  |  |  |  |  |  |  |  |  |  |  |
| Asian | 0.297** | 0.298** | 0.298** | 0.298** | 0.298** | 0.298** | 0.297** | 0.286** | 0.296** | 0.296** | 0.296** | 0.297** | 0.293** | 0.286** |
|  | (0.0983) | (0.0984) | (0.0984) | (0.0984) | (0.0984) | (0.0984) | (0.0984) | (0.0978) | (0.0981) | (0.0981) | (0.0982) | (0.0982) | (0.0980) | (0.0981) |
|  |  |  |  |  |  |  |  |  |  |  |  |  |  |  |
| dNI/AN | 0.666* | 0.714** | 0.715** | 0.713** | 0.714** | 0.711** | 0.719** | 0.663* | 0.715** | 0.716** | 0.713** | 0.713** | 0.708** | 0.718** |
|  | (0.260) | (0.262) | (0.261) | (0.262) | (0.262) | (0.262) | (0.262) | (0.259) | (0.262) | (0.261) | (0.262) | (0.262) | (0.261) | (0.261) |
|  |  |  |  |  |  |  |  |  |  |  |  |  |  |  |
| eNHOPI | 0.178 | 0.166 | 0.170 | 0.166 | 0.166 | 0.167 | 0.170 | 0.178 | 0.165 | 0.169 | 0.166 | 0.166 | 0.167 | 0.167 |
|  | (0.433) | (0.433) | (0.433) | (0.433) | (0.433) | (0.433) | (0.433) | (0.434) | (0.434) | (0.434) | (0.433) | (0.433) | (0.434) | (0.433) |
|  |  |  |  |  |  |  |  |  |  |  |  |  |  |  |
| Multi-Race/Other | 0.242 | 0.252 | 0.253 | 0.252 | 0.252 | 0.252 | 0.252 | 0.242 | 0.252 | 0.253 | 0.252 | 0.250 | 0.252 | 0.251 |
|  | (0.156) | (0.156) | (0.156) | (0.156) | (0.156) | (0.156) | (0.156) | (0.156) | (0.155) | (0.155) | (0.156) | (0.156) | (0.156) | (0.155) |
|  |  |  |  |  |  |  |  |  |  |  |  |  |  |  |
| Religious Salience | -0.0481*** | -0.0482*** | -0.0484*** | -0.0482*** | -0.0482*** | -0.0482*** | -0.0484*** | -0.0482*** | -0.0481*** | -0.0482*** | -0.0481*** | -0.0481*** | -0.0482*** | -0.0484*** |
|  | (0.0112) | (0.0112) | (0.0112) | (0.0112) | (0.0112) | (0.0112) | (0.0112) | (0.0112) | (0.0112) | (0.0112) | (0.0112) | (0.0112) | (0.0112) | (0.0112) |
|  |  |  |  |  |  |  |  |  |  |  |  |  |  |  |
| Religious Attendance | -0.116*** | -0.116*** | -0.116*** | -0.116*** | -0.116*** | -0.116*** | -0.116*** | -0.117*** | -0.116*** | -0.116*** | -0.115*** | -0.115*** | -0.116*** | -0.117*** |
|  | (0.0149) | (0.0150) | (0.0150) | (0.0150) | (0.0150) | (0.0150) | (0.0150) | (0.0150) | (0.0150) | (0.0150) | (0.0150) | (0.0150) | (0.0150) | (0.0150) |
|  |  |  |  |  |  |  |  |  |  |  |  |  |  |  |
| Cocaine | -0.0816 | -0.0650 | -0.0611 | -0.0650 | -0.0650 | -0.0644 | -0.0629 | -0.0848 | -0.0661 | -0.0627 | -0.0650 | -0.0645 | -0.0622 | -0.0667 |
|  | (0.0685) | (0.0699) | (0.0698) | (0.0698) | (0.0697) | (0.0698) | (0.0698) | (0.0685) | (0.0699) | (0.0698) | (0.0697) | (0.0696) | (0.0696) | (0.0697) |
|  |  |  |  |  |  |  |  |  |  |  |  |  |  |  |
| Stimulant | 0.628*** | 0.637*** | 0.636*** | 0.637*** | 0.637*** | 0.637*** | 0.635*** | 0.631*** | 0.639*** | 0.636*** | 0.638*** | 0.637*** | 0.638*** | 0.638*** |
|  | (0.0689) | (0.0690) | (0.0689) | (0.0689) | (0.0690) | (0.0690) | (0.0689) | (0.0689) | (0.0691) | (0.0689) | (0.0689) | (0.0690) | (0.0691) | (0.0689) |
|  |  |  |  |  |  |  |  |  |  |  |  |  |  |  |
| Sedative | 0.864*** | 0.882*** | 0.882*** | 0.882*** | 0.882*** | 0.883*** | 0.884*** | 0.866*** | 0.882*** | 0.882*** | 0.882*** | 0.883*** | 0.884*** | 0.886*** |
|  | (0.0720) | (0.0725) | (0.0724) | (0.0725) | (0.0725) | (0.0722) | (0.0723) | (0.0720) | (0.0726) | (0.0725) | (0.0726) | (0.0725) | (0.0722) | (0.0724) |
|  |  |  |  |  |  |  |  |  |  |  |  |  |  |  |
| Tranquilizer | 1.039*** | 1.038*** | 1.038*** | 1.038*** | 1.038*** | 1.038*** | 1.038*** | 1.038*** | 1.037*** | 1.038*** | 1.038*** | 1.039*** | 1.038*** | 1.037*** |
|  | (0.0550) | (0.0550) | (0.0551) | (0.0550) | (0.0550) | (0.0550) | (0.0551) | (0.0549) | (0.0549) | (0.0551) | (0.0550) | (0.0550) | (0.0550) | (0.0550) |
|  |  |  |  |  |  |  |  |  |  |  |  |  |  |  |
| Heroine | 0.544*** | 0.617*** | 0.592*** | 0.618*** | 0.618*** | 0.614*** | 0.585*** | 0.525*** | 0.604*** | 0.591*** | 0.618*** | 0.616*** | 0.605*** | 0.567*** |
|  | (0.147) | (0.146) | (0.146) | (0.145) | (0.145) | (0.145) | (0.146) | (0.147) | (0.147) | (0.145) | (0.145) | (0.145) | (0.145) | (0.146) |
|  |  |  |  |  |  |  |  |  |  |  |  |  |  |  |
| Pain Killers | 0.350*** | 0.355*** | 0.354*** | 0.355*** | 0.355*** | 0.355*** | 0.353*** | 0.344*** | 0.352*** | 0.353*** | 0.354*** | 0.354*** | 0.353*** | 0.347*** |
|  | (0.0638) | (0.0637) | (0.0637) | (0.0637) | (0.0637) | (0.0637) | (0.0638) | (0.0637) | (0.0639) | (0.0635) | (0.0637) | (0.0638) | (0.0637) | (0.0637) |
|  |  |  |  |  |  |  |  |  |  |  |  |  |  |  |
| Marijuana | 0.421*** | 0.415*** | 0.416*** | 0.415*** | 0.414*** | 0.415*** | 0.416*** | 0.421*** | 0.415*** | 0.417*** | 0.414*** | 0.414*** | 0.414*** | 0.415*** |
|  | (0.0695) | (0.0695) | (0.0696) | (0.0695) | (0.0694) | (0.0696) | (0.0696) | (0.0695) | (0.0695) | (0.0696) | (0.0695) | (0.0694) | (0.0696) | (0.0696) |
|  |  |  |  |  |  |  |  |  |  |  |  |  |  |  |
| PCP | -0.0874 | 0.0312 | 0.0190 | 0.0314 | 0.0305 | 0.0287 | 0.0135 | -0.115 | 0.0308 | 0.0210 | 0.0281 | 0.0302 | 0.0153 | -0.0186 |
|  | (0.179) | (0.179) | (0.178) | (0.179) | (0.179) | (0.178) | (0.179) | (0.179) | (0.178) | (0.178) | (0.179) | (0.179) | (0.177) | (0.180) |
|  |  |  |  |  |  |  |  |  |  |  |  |  |  |  |
| Inhalants | 0.541*** | 0.559*** | 0.560*** | 0.559*** | 0.559*** | 0.559*** | 0.561*** | 0.545*** | 0.561*** | 0.559*** | 0.559*** | 0.559*** | 0.560*** | 0.565*** |
|  | (0.0745) | (0.0743) | (0.0744) | (0.0743) | (0.0743) | (0.0743) | (0.0745) | (0.0742) | (0.0743) | (0.0742) | (0.0742) | (0.0743) | (0.0744) | (0.0743) |
|  |  |  |  |  |  |  |  |  |  |  |  |  |  |  |
| Tobacco | 0.420*** | 0.414*** | 0.416*** | 0.414*** | 0.414*** | 0.414*** | 0.416*** | 0.423*** | 0.415*** | 0.416*** | 0.414*** | 0.414*** | 0.415*** | 0.419*** |
|  | (0.0549) | (0.0549) | (0.0550) | (0.0549) | (0.0549) | (0.0549) | (0.0549) | (0.0549) | (0.0549) | (0.0550) | (0.0549) | (0.0549) | (0.0548) | (0.0548) |
|  |  |  |  |  |  |  |  |  |  |  |  |  |  |  |
| Age of 1st Alcohol Use | -0.0328 | -0.0348 | -0.0337 | -0.0348 | -0.0349 | -0.0346 | -0.0333 | -0.0314 | -0.0347 | -0.0339 | -0.0350 | -0.0351 | -0.0345 | -0.0321 |
|  | (0.0282) | (0.0280) | (0.0281) | (0.0281) | (0.0280) | (0.0281) | (0.0281) | (0.0283) | (0.0281) | (0.0282) | (0.0281) | (0.0280) | (0.0281) | (0.0282) |
|  |  |  |  |  |  |  |  |  |  |  |  |  |  |  |
| Risky Behaviors | 0.660*** | 0.662*** | 0.662*** | 0.662*** | 0.663*** | 0.662*** | 0.662*** | 0.660*** | 0.662*** | 0.662*** | 0.662*** | 0.663*** | 0.662*** | 0.661*** |
|  | (0.0308) | (0.0308) | (0.0308) | (0.0308) | (0.0308) | (0.0308) | (0.0308) | (0.0308) | (0.0309) | (0.0308) | (0.0308) | (0.0308) | (0.0308) | (0.0308) |
|  |  |  |  |  |  |  |  |  |  |  |  |  |  |  |
| f2009 | -0.0477 | -0.0461 | -0.0465 | -0.0461 | -0.0462 | -0.0462 | -0.0457 | -0.0480 | -0.0462 | -0.0454 | -0.0461 | -0.0465 | -0.0458 | -0.0442 |
|  | (0.121) | (0.121) | (0.121) | (0.121) | (0.121) | (0.121) | (0.121) | (0.121) | (0.121) | (0.121) | (0.121) | (0.121) | (0.121) | (0.121) |
|  |  |  |  |  |  |  |  |  |  |  |  |  |  |  |
| 2010 | 0.0335 | 0.0334 | 0.0332 | 0.0333 | 0.0333 | 0.0332 | 0.0346 | 0.0360 | 0.0357 | 0.0347 | 0.0342 | 0.0332 | 0.0351 | 0.0385 |
|  | (0.118) | (0.118) | (0.118) | (0.118) | (0.118) | (0.118) | (0.118) | (0.118) | (0.118) | (0.118) | (0.118) | (0.118) | (0.118) | (0.118) |
|  |  |  |  |  |  |  |  |  |  |  |  |  |  |  |
| 2011 | 0.0332 | 0.0362 | 0.0353 | 0.0362 | 0.0363 | 0.0360 | 0.0365 | 0.0326 | 0.0361 | 0.0356 | 0.0368 | 0.0360 | 0.0355 | 0.0376 |
|  | (0.117) | (0.117) | (0.117) | (0.117) | (0.117) | (0.117) | (0.117) | (0.117) | (0.117) | (0.117) | (0.117) | (0.117) | (0.118) | (0.117) |
|  |  |  |  |  |  |  |  |  |  |  |  |  |  |  |
| 2012 | 0.137 | 0.139 | 0.139 | 0.139 | 0.139 | 0.139 | 0.139 | 0.135 | 0.138 | 0.138 | 0.138 | 0.138 | 0.137 | 0.139 |
|  | (0.118) | (0.119) | (0.119) | (0.119) | (0.119) | (0.119) | (0.119) | (0.118) | (0.119) | (0.119) | (0.118) | (0.118) | (0.119) | (0.119) |
|  |  |  |  |  |  |  |  |  |  |  |  |  |  |  |
| 2013 | 0.260† | 0.260† | 0.261† | 0.260† | 0.260† | 0.260† | 0.261† | 0.261† | 0.259† | 0.261† | 0.261† | 0.260† | 0.260† | 0.264† |
|  | (0.143) | (0.142) | (0.142) | (0.142) | (0.142) | (0.143) | (0.142) | (0.142) | (0.142) | (0.142) | (0.142) | (0.142) | (0.142) | (0.142) |
|  |  |  |  |  |  |  |  |  |  |  |  |  |  |  |
| 2014 | 0.0662 | 0.0629 | 0.0627 | 0.0629 | 0.0628 | 0.0626 | 0.0635 | 0.0643 | 0.0623 | 0.0623 | 0.0631 | 0.0626 | 0.0626 | 0.0629 |
|  | (0.105) | (0.105) | (0.105) | (0.105) | (0.105) | (0.105) | (0.105) | (0.105) | (0.105) | (0.105) | (0.105) | (0.105) | (0.105) | (0.105) |
|  |  |  |  |  |  |  |  |  |  |  |  |  |  |  |
| 2015 | -0.342** | -0.347** | -0.347** | -0.347** | -0.347** | -0.347** | -0.345** | -0.340** | -0.348** | -0.347** | -0.347** | -0.348** | -0.347** | -0.342** |
|  | (0.119) | (0.119) | (0.119) | (0.119) | (0.119) | (0.119) | (0.119) | (0.119) | (0.119) | (0.119) | (0.119) | (0.119) | (0.119) | (0.119) |
|  |  |  |  |  |  |  |  |  |  |  |  |  |  |  |
| 2016 | -0.225* | -0.231* | -0.231* | -0.231* | -0.231* | -0.231* | -0.229* | -0.222† | -0.230* | -0.230* | -0.231* | -0.232* | -0.231* | -0.226* |
|  | (0.113) | (0.113) | (0.113) | (0.113) | (0.113) | (0.113) | (0.113) | (0.113) | (0.113) | (0.113) | (0.113) | (0.113) | (0.113) | (0.113) |
|  |  |  |  |  |  |  |  |  |  |  |  |  |  |  |
| 2017 | -0.0902 | -0.0986 | -0.0989 | -0.0986 | -0.0988 | -0.0988 | -0.0972 | -0.0887 | -0.0983 | -0.0993 | -0.0985 | -0.0996 | -0.0991 | -0.0944 |
|  | (0.120) | (0.120) | (0.119) | (0.119) | (0.119) | (0.119) | (0.119) | (0.120) | (0.120) | (0.120) | (0.119) | (0.119) | (0.119) | (0.119) |
|  |  |  |  |  |  |  |  |  |  |  |  |  |  |  |
| 2018 | 0.205† | 0.198 | 0.198 | 0.198 | 0.198 | 0.198 | 0.200 | 0.206† | 0.197 | 0.198 | 0.199 | 0.198 | 0.198 | 0.202 |
|  | (0.124) | (0.123) | (0.123) | (0.123) | (0.123) | (0.123) | (0.123) | (0.123) | (0.123) | (0.123) | (0.123) | (0.123) | (0.123) | (0.123) |
|  |  |  |  |  |  |  |  |  |  |  |  |  |  |  |
| 2019 | 0.516*** | 0.507*** | 0.507*** | 0.507*** | 0.506*** | 0.506*** | 0.508*** | 0.518*** | 0.507*** | 0.508*** | 0.507*** | 0.506*** | 0.505*** | 0.510*** |
|  | (0.128) | (0.128) | (0.128) | (0.128) | (0.128) | (0.128) | (0.128) | (0.128) | (0.128) | (0.128) | (0.128) | (0.128) | (0.128) | (0.128) |
|  |  |  |  |  |  |  |  |  |  |  |  |  |  |  |
| MDMA | 0.154† | 0.158 | 0.149† | 0.154† | 0.154† | 0.154† | 0.150† | 0.160† | -0.194 | 0.151† | 0.154† | 0.156† | 0.153† | 0.157† |
|  | (0.0832) | (0.118) | (0.0838) | (0.0841) | (0.0841) | (0.0843) | (0.0839) | (0.0828) | (0.340) | (0.0838) | (0.0841) | (0.0842) | (0.0844) | (0.0837) |
|  |  |  |  |  |  |  |  |  |  |  |  |  |  |  |
| LCPU | 0.0666 |  |  |  |  |  |  | 0.0748 |  |  |  |  |  |  |
|  | (0.0981) |  |  |  |  |  |  | (0.260) |  |  |  |  |  |  |
|  |  |  |  |  |  |  |  |  |  |  |  |  |  |  |
| Priv Hlth Ins | -0.921*** | -0.990*** | -0.952*** | -0.991*** | -0.990*** | -0.985*** | -0.945*** | -1.176*** | -1.211*** | -1.167*** | -1.102*** | -1.111*** | -1.149*** | -1.176*** |
|  | (0.0657) | (0.0647) | (0.0664) | (0.0630) | (0.0628) | (0.0646) | (0.0629) | (0.156) | (0.151) | (0.146) | (0.139) | (0.138) | (0.138) | (0.150) |
|  |  |  |  |  |  |  |  |  |  |  |  |  |  |  |
| Pub Hlth Ins | 0.169** | 0.170** | 0.170** | 0.170** | 0.170** | 0.170** | 0.169** | 0.177** | 0.175** | 0.175** | 0.173** | 0.173** | 0.175** | 0.177** |
|  | (0.0582) | (0.0582) | (0.0584) | (0.0583) | (0.0582) | (0.0582) | (0.0584) | (0.0584) | (0.0585) | (0.0585) | (0.0584) | (0.0583) | (0.0583) | (0.0586) |
|  |  |  |  |  |  |  |  |  |  |  |  |  |  |  |
| Oth Hlth Ins | -0.615*** | -0.618*** | -0.616*** | -0.618*** | -0.618*** | -0.618*** | -0.616*** | -0.599*** | -0.605*** | -0.603*** | -0.607*** | -0.607*** | -0.605*** | -0.601*** |
|  | (0.147) | (0.146) | (0.146) | (0.146) | (0.146) | (0.146) | (0.146) | (0.146) | (0.146) | (0.146) | (0.145) | (0.145) | (0.145) | (0.146) |
|  |  |  |  |  |  |  |  |  |  |  |  |  |  |  |
| LCPU * Priv Hlth Ins | -0.348** |  |  |  |  |  |  | 0.400 |  |  |  |  |  |  |
|  | (0.115) |  |  |  |  |  |  | (0.381) |  |  |  |  |  |  |
|  |  |  |  |  |  |  |  |  |  |  |  |  |  |  |
| Psilocybin |  | -0.268** | -0.0812 | -0.268** | -0.267** | -0.268** | -0.265** |  | -0.263** | -0.471† | -0.268** | -0.268** | -0.268** | -0.252** |
|  |  | (0.0846) | (0.121) | (0.0846) | (0.0846) | (0.0846) | (0.0844) |  | (0.0844) | (0.269) | (0.0845) | (0.0846) | (0.0847) | (0.0846) |
|  |  |  |  |  |  |  |  |  |  |  |  |  |  |  |
| DMT |  | 0.552 | 0.540 | 0.473 | 0.528 | 0.551 | 0.543 |  | 0.545 | 0.526 | 2.086 | 0.540 | 0.558 | 0.561 |
|  |  | (0.588) | (0.586) | (0.946) | (0.593) | (0.588) | (0.586) |  | (0.589) | (0.589) | (1.542) | (0.593) | (0.590) | (0.587) |
|  |  |  |  |  |  |  |  |  |  |  |  |  |  |  |
| Ayahuasca |  | 1.271 | 1.282 | 1.287 | 2.630 | 1.273 | 1.284 |  | 1.328 | 1.290 | 1.281 | -6.676† | 1.306 | 1.314 |
|  |  | (1.702) | (1.704) | (1.720) | (2.173) | (1.702) | (1.705) |  | (1.711) | (1.701) | (1.722) | (3.726) | (1.700) | (1.699) |
|  |  |  |  |  |  |  |  |  |  |  |  |  |  |  |
| Peyote/Mescaline |  | -0.464*** | -0.471*** | -0.464*** | -0.464*** | -0.411† | -0.466*** |  | -0.467*** | -0.474*** | -0.462*** | -0.462*** | -0.500 | -0.463*** |
|  |  | (0.125) | (0.124) | (0.125) | (0.125) | (0.223) | (0.124) |  | (0.125) | (0.124) | (0.125) | (0.125) | (0.572) | (0.124) |
|  |  |  |  |  |  |  |  |  |  |  |  |  |  |  |
| LSD |  | 0.133 | 0.133 | 0.133 | 0.133 | 0.134 | 0.328** |  | 0.133 | 0.132 | 0.135 | 0.134 | 0.136 | 0.357 |
|  |  | (0.0827) | (0.0828) | (0.0828) | (0.0827) | (0.0824) | (0.122) |  | (0.0833) | (0.0833) | (0.0831) | (0.0828) | (0.0822) | (0.297) |
|  |  |  |  |  |  |  |  |  |  |  |  |  |  |  |
| MDMA * Priv Hlth Ins |  | -0.00531 |  |  |  |  |  |  | 1.108* |  |  |  |  |  |
|  |  | (0.126) |  |  |  |  |  |  | (0.488) |  |  |  |  |  |
|  |  |  |  |  |  |  |  |  |  |  |  |  |  |  |
| Psilocybin * Priv Hlth Ins |  |  | -0.281* |  |  |  |  |  |  | 0.424 |  |  |  |  |
|  |  |  | (0.127) |  |  |  |  |  |  | (0.395) |  |  |  |  |
|  |  |  |  |  |  |  |  |  |  |  |  |  |  |  |
| DMT * Priv Hlth Ins |  |  |  | 0.142 |  |  |  |  |  |  | -4.876* |  |  |  |
|  |  |  |  | (1.079) |  |  |  |  |  |  | (2.438) |  |  |  |
|  |  |  |  |  |  |  |  |  |  |  |  |  |  |  |
| Ayahuasca * Priv Hlth Ins |  |  |  |  | -2.084 |  |  |  |  |  |  | 16.76† |  |  |
|  |  |  |  |  | (2.817) |  |  |  |  |  |  | (8.501) |  |  |
|  |  |  |  |  |  |  |  |  |  |  |  |  |  |  |
| Peyote/Mescaline * Priv Hlth Ins |  |  |  |  |  | -0.0880 |  |  |  |  |  |  | 0.806 |  |
|  |  |  |  |  |  | (0.259) |  |  |  |  |  |  | (0.791) |  |
|  |  |  |  |  |  |  |  |  |  |  |  |  |  |  |
| LSD * Priv Hlth Ins |  |  |  |  |  |  | -0.302* |  |  |  |  |  |  | 0.574 |
|  |  |  |  |  |  |  | (0.149) |  |  |  |  |  |  | (0.469) |
|  |  |  |  |  |  |  |  |  |  |  |  |  |  |  |
| LCPU * Education |  |  |  |  |  |  |  | 0.00184 |  |  |  |  |  |  |
|  |  |  |  |  |  |  |  | (0.0940) |  |  |  |  |  |  |
|  |  |  |  |  |  |  |  |  |  |  |  |  |  |  |
| Priv Hlth Ins * Education |  |  |  |  |  |  |  | 0.0905† | 0.0817 | 0.0814† | 0.0422 | 0.0456 | 0.0601 | 0.0819† |
|  |  |  |  |  |  |  |  | (0.0517) | (0.0504) | (0.0483) | (0.0452) | (0.0448) | (0.0446) | (0.0491) |
|  |  |  |  |  |  |  |  |  |  |  |  |  |  |  |
| LCPU * Priv Hlth Ins * Education |  |  |  |  |  |  |  | -0.240* |  |  |  |  |  |  |
|  |  |  |  |  |  |  |  | (0.090) |  |  |  |  |  |  |
|  |  |  |  |  |  |  |  |  |  |  |  |  |  |  |
| MDMA * Education |  |  |  |  |  |  |  |  | 0.144 |  |  |  |  |  |
|  |  |  |  |  |  |  |  |  | (0.117) |  |  |  |  |  |
|  |  |  |  |  |  |  |  |  |  |  |  |  |  |  |
| MDMA * Priv Hlth Ins * Education |  |  |  |  |  |  |  |  | -0.384* |  |  |  |  |  |
|  |  |  |  |  |  |  |  |  | (0.162) |  |  |  |  |  |
|  |  |  |  |  |  |  |  |  |  |  |  |  |  |  |
| Psilocybin * Education |  |  |  |  |  |  |  |  |  | 0.157 |  |  |  |  |
|  |  |  |  |  |  |  |  |  |  | (0.0947) |  |  |  |  |
|  |  |  |  |  |  |  |  |  |  |  |  |  |  |  |
| Psilocybin * Priv Hlth Ins * Education |  |  |  |  |  |  |  |  |  | -0.255* |  |  |  |  |
|  |  |  |  |  |  |  |  |  |  | (0.090) |  |  |  |  |
|  |  |  |  |  |  |  |  |  |  |  |  |  |  |  |
| DMT * Education |  |  |  |  |  |  |  |  |  |  | -0.562 |  |  |  |
|  |  |  |  |  |  |  |  |  |  |  | (0.688) |  |  |  |
|  |  |  |  |  |  |  |  |  |  |  |  |  |  |  |
| DMT * Priv Hlth Ins * Education |  |  |  |  |  |  |  |  |  |  | 1.626 |  |  |  |
|  |  |  |  |  |  |  |  |  |  |  | (0.911) |  |  |  |
|  |  |  |  |  |  |  |  |  |  |  |  |  |  |  |
| Ayahuasca * Education |  |  |  |  |  |  |  |  |  |  |  | 3.134* |  |  |
|  |  |  |  |  |  |  |  |  |  |  |  | (1.378) |  |  |
|  |  |  |  |  |  |  |  |  |  |  |  |  |  |  |
| Ayahuasca * Priv Hlth Ins * Education |  |  |  |  |  |  |  |  |  |  |  | -5.892* |  |  |
|  |  |  |  |  |  |  |  |  |  |  |  | (2.656) |  |  |
|  |  |  |  |  |  |  |  |  |  |  |  |  |  |  |
| Peyote/Mescaline * Education |  |  |  |  |  |  |  |  |  |  |  |  | 0.0382 |  |
|  |  |  |  |  |  |  |  |  |  |  |  |  | (0.200) |  |
|  |  |  |  |  |  |  |  |  |  |  |  |  |  |  |
| Peyote/Mescaline * Priv Hlth Ins * Education |  |  |  |  |  |  |  |  |  |  |  |  | -0.297 |  |
|  |  |  |  |  |  |  |  |  |  |  |  |  | (0.271) |  |
|  |  |  |  |  |  |  |  |  |  |  |  |  |  |  |
| LSD * Education |  |  |  |  |  |  |  |  |  |  |  |  |  | -0.00926 |
|  |  |  |  |  |  |  |  |  |  |  |  |  |  | (0.110) |
|  |  |  |  |  |  |  |  |  |  |  |  |  |  |  |
| LSD * Priv Hlth Ins * Education |  |  |  |  |  |  |  |  |  |  |  |  |  | -0.283* |
|  |  |  |  |  |  |  |  |  |  |  |  |  |  | (0.104) |
|  |  |  |  |  |  |  |  |  |  |  |  |  |  |  |
| Constant | 18.45*** | 18.46*** | 18.43*** | 18.46*** | 18.46*** | 18.46*** | 18.43*** | 18.51*** | 18.56*** | 18.56*** | 18.53*** | 18.53*** | 18.53*** | 18.48*** |
|  | (0.224) | (0.227) | (0.226) | (0.227) | (0.227) | (0.226) | (0.228) | (0.245) | (0.250) | (0.246) | (0.243) | (0.242) | (0.244) | (0.249) |
| Observations | 149002 | 149002 | 149002 | 149002 | 149002 | 149002 | 149002 | 149002 | 149002 | 149002 | 149002 | 149002 | 149002 | 149002 |
| *R*2 | 0.152 | 0.153 | 0.153 | 0.153 | 0.153 | 0.153 | 0.153 | 0.153 | 0.153 | 0.153 | 0.153 | 0.153 | 0.153 | 0.153 |

Standard errors in parentheses

Source: 2008-2019 National Survey of Drug Use and Health, n=484,732

aMen serve as the references category for Women

bSingle Serves as the reference category for Marital Statuses

cWhite, Non-Hispanic Serves as the reference category for race/ethnicity

dNI/AN = Native Indian or Alaskan Native

e NHOPI = Native Hawaiian or Pacific Islander

f2008 serves as the reference category for the year survey was taken

† *p* < .10, * *p* < .05, ** *p* < .01, *** *p* < .001

Supplemental Table 9. Weighted Multivariate Ordinary Least Square Regression Predicting Psychological Distress Among The Total Population with Public Health Insurance Interaction Terms

|  | Model 1 | Model 2 | Model 3 | Model 4 | Model 5 | Model 6 | Model 7 | Model 8 | Model 9 | Model 10 | Model 11 | Model 12 | Model 13 | Model 14 |
| --- | --- | --- | --- | --- | --- | --- | --- | --- | --- | --- | --- | --- | --- | --- |
| Age | -0.566*** | -0.565*** | -0.564*** | -0.568*** | -0.568*** | -0.567*** | -0.564*** | -0.566*** | -0.566*** | -0.565*** | -0.569*** | -0.569*** | -0.568*** | -0.565*** |
|  | (0.0109) | (0.0111) | (0.0111) | (0.0112) | (0.0112) | (0.0110) | (0.0111) | (0.0109) | (0.0111) | (0.0111) | (0.0112) | (0.0112) | (0.0110) | (0.0111) |
|  |  |  |  |  |  |  |  |  |  |  |  |  |  |  |
| Education | -0.333*** | -0.325*** | -0.327*** | -0.323*** | -0.323*** | -0.325*** | -0.328*** | -0.177*** | -0.189*** | -0.197*** | -0.206*** | -0.206*** | -0.198*** | -0.176*** |
|  | (0.0254) | (0.0257) | (0.0258) | (0.0257) | (0.0257) | (0.0259) | (0.0258) | (0.0296) | (0.0305) | (0.0297) | (0.0298) | (0.0296) | (0.0296) | (0.0294) |
|  |  |  |  |  |  |  |  |  |  |  |  |  |  |  |
| Family Income | -0.277*** | -0.279*** | -0.278*** | -0.278*** | -0.278*** | -0.277*** | -0.277*** | -0.274*** | -0.275*** | -0.274*** | -0.274*** | -0.274*** | -0.274*** | -0.274*** |
|  | (0.0134) | (0.0134) | (0.0133) | (0.0134) | (0.0134) | (0.0134) | (0.0134) | (0.0133) | (0.0133) | (0.0133) | (0.0133) | (0.0133) | (0.0133) | (0.0133) |
|  |  |  |  |  |  |  |  |  |  |  |  |  |  |  |
| aWomen | 0.937*** | 0.921*** | 0.924*** | 0.924*** | 0.924*** | 0.927*** | 0.927*** | 0.925*** | 0.908*** | 0.910*** | 0.911*** | 0.911*** | 0.914*** | 0.915*** |
|  | (0.0481) | (0.0478) | (0.0477) | (0.0478) | (0.0478) | (0.0479) | (0.0476) | (0.0480) | (0.0479) | (0.0476) | (0.0479) | (0.0479) | (0.0480) | (0.0476) |
|  |  |  |  |  |  |  |  |  |  |  |  |  |  |  |
| bMarried | -0.337*** | -0.340*** | -0.338*** | -0.335*** | -0.335*** | -0.334*** | -0.337*** | -0.333*** | -0.337*** | -0.333*** | -0.332*** | -0.332*** | -0.331*** | -0.333*** |
|  | (0.0611) | (0.0612) | (0.0614) | (0.0612) | (0.0611) | (0.0611) | (0.0613) | (0.0612) | (0.0613) | (0.0615) | (0.0611) | (0.0610) | (0.0610) | (0.0615) |
|  |  |  |  |  |  |  |  |  |  |  |  |  |  |  |
| Widowed | -0.377** | -0.404** | -0.393** | -0.415*** | -0.415*** | -0.405** | -0.390** | -0.393** | -0.425*** | -0.411*** | -0.434*** | -0.433*** | -0.423*** | -0.406** |
|  | (0.121) | (0.121) | (0.121) | (0.121) | (0.121) | (0.122) | (0.121) | (0.121) | (0.121) | (0.122) | (0.122) | (0.122) | (0.122) | (0.122) |
|  |  |  |  |  |  |  |  |  |  |  |  |  |  |  |
| Divorced | 0.448*** | 0.460*** | 0.453*** | 0.463*** | 0.463*** | 0.459*** | 0.453*** | 0.462*** | 0.472*** | 0.467*** | 0.476*** | 0.476*** | 0.473*** | 0.468*** |
|  | (0.0892) | (0.0892) | (0.0894) | (0.0890) | (0.0890) | (0.0891) | (0.0891) | (0.0887) | (0.0889) | (0.0891) | (0.0886) | (0.0886) | (0.0886) | (0.0886) |
|  |  |  |  |  |  |  |  |  |  |  |  |  |  |  |
| cBlack | -0.507*** | -0.520*** | -0.511*** | -0.518*** | -0.518*** | -0.516*** | -0.513*** | -0.505*** | -0.524*** | -0.516*** | -0.523*** | -0.523*** | -0.520*** | -0.510*** |
|  | (0.0701) | (0.0698) | (0.0698) | (0.0697) | (0.0697) | (0.0697) | (0.0697) | (0.0711) | (0.0707) | (0.0705) | (0.0704) | (0.0704) | (0.0703) | (0.0707) |
|  |  |  |  |  |  |  |  |  |  |  |  |  |  |  |
| Hispanic | -0.128 | -0.127 | -0.125 | -0.123 | -0.123 | -0.125 | -0.125 | -0.110 | -0.117 | -0.116 | -0.116 | -0.116 | -0.115 | -0.108 |
|  | (0.0789) | (0.0789) | (0.0791) | (0.0788) | (0.0788) | (0.0790) | (0.0789) | (0.0786) | (0.0785) | (0.0783) | (0.0782) | (0.0782) | (0.0782) | (0.0786) |
|  |  |  |  |  |  |  |  |  |  |  |  |  |  |  |
| Asian | 0.281** | 0.294** | 0.289** | 0.298** | 0.298** | 0.295** | 0.286** | 0.243* | 0.264** | 0.259** | 0.272** | 0.272** | 0.266** | 0.249* |
|  | (0.0983) | (0.0982) | (0.0982) | (0.0984) | (0.0984) | (0.0987) | (0.0984) | (0.0982) | (0.0978) | (0.0982) | (0.0985) | (0.0984) | (0.0984) | (0.0985) |
|  |  |  |  |  |  |  |  |  |  |  |  |  |  |  |
| dNI/AN | 0.645* | 0.709** | 0.711** | 0.714** | 0.714** | 0.703** | 0.719** | 0.641* | 0.708** | 0.711** | 0.709** | 0.709** | 0.697** | 0.718** |
|  | (0.259) | (0.261) | (0.260) | (0.262) | (0.262) | (0.261) | (0.262) | (0.259) | (0.263) | (0.261) | (0.263) | (0.263) | (0.262) | (0.262) |
|  |  |  |  |  |  |  |  |  |  |  |  |  |  |  |
| eNHOPI | 0.173 | 0.163 | 0.170 | 0.166 | 0.166 | 0.168 | 0.167 | 0.185 | 0.170 | 0.179 | 0.174 | 0.174 | 0.178 | 0.176 |
|  | (0.432) | (0.433) | (0.432) | (0.433) | (0.433) | (0.432) | (0.432) | (0.428) | (0.429) | (0.428) | (0.429) | (0.429) | (0.428) | (0.428) |
|  |  |  |  |  |  |  |  |  |  |  |  |  |  |  |
| Multi-Race/Other | 0.225 | 0.248 | 0.236 | 0.252 | 0.252 | 0.247 | 0.249 | 0.227 | 0.250 | 0.235 | 0.255 | 0.254 | 0.250 | 0.250 |
|  | (0.157) | (0.156) | (0.156) | (0.156) | (0.156) | (0.156) | (0.156) | (0.157) | (0.156) | (0.157) | (0.156) | (0.156) | (0.156) | (0.156) |
|  |  |  |  |  |  |  |  |  |  |  |  |  |  |  |
| Religious Salience | -0.0485*** | -0.0486*** | -0.0485*** | -0.0482*** | -0.0481*** | -0.0482*** | -0.0486*** | -0.0486*** | -0.0486*** | -0.0485*** | -0.0480*** | -0.0480*** | -0.0481*** | -0.0486*** |
|  | (0.0113) | (0.0112) | (0.0112) | (0.0112) | (0.0112) | (0.0112) | (0.0112) | (0.0112) | (0.0111) | (0.0112) | (0.0112) | (0.0112) | (0.0112) | (0.0112) |
|  |  |  |  |  |  |  |  |  |  |  |  |  |  |  |
| Religious Attendance | -0.117*** | -0.116*** | -0.117*** | -0.116*** | -0.116*** | -0.116*** | -0.116*** | -0.116*** | -0.115*** | -0.116*** | -0.114*** | -0.114*** | -0.115*** | -0.116*** |
|  | (0.0149) | (0.0150) | (0.0150) | (0.0150) | (0.0150) | (0.0150) | (0.0149) | (0.0148) | (0.0150) | (0.0149) | (0.0149) | (0.0149) | (0.0150) | (0.0148) |
|  |  |  |  |  |  |  |  |  |  |  |  |  |  |  |
| Cocaine | -0.0868 | -0.0621 | -0.0640 | -0.0650 | -0.0650 | -0.0657 | -0.0656 | -0.0849 | -0.0594 | -0.0623 | -0.0632 | -0.0628 | -0.0620 | -0.0650 |
|  | (0.0685) | (0.0697) | (0.0700) | (0.0698) | (0.0697) | (0.0699) | (0.0695) | (0.0687) | (0.0701) | (0.0704) | (0.0701) | (0.0700) | (0.0701) | (0.0697) |
|  |  |  |  |  |  |  |  |  |  |  |  |  |  |  |
| Stimulant | 0.635*** | 0.641*** | 0.641*** | 0.637*** | 0.637*** | 0.639*** | 0.641*** | 0.634*** | 0.641*** | 0.638*** | 0.635*** | 0.635*** | 0.636*** | 0.639*** |
|  | (0.0690) | (0.0691) | (0.0689) | (0.0689) | (0.0690) | (0.0689) | (0.0689) | (0.0692) | (0.0694) | (0.0690) | (0.0689) | (0.0691) | (0.0692) | (0.0692) |
|  |  |  |  |  |  |  |  |  |  |  |  |  |  |  |
| Sedative | 0.853*** | 0.878*** | 0.873*** | 0.882*** | 0.882*** | 0.885*** | 0.879*** | 0.863*** | 0.884*** | 0.880*** | 0.889*** | 0.889*** | 0.894*** | 0.890*** |
|  | (0.0727) | (0.0725) | (0.0729) | (0.0724) | (0.0725) | (0.0725) | (0.0729) | (0.0727) | (0.0725) | (0.0730) | (0.0724) | (0.0725) | (0.0722) | (0.0730) |
|  |  |  |  |  |  |  |  |  |  |  |  |  |  |  |
| Tranquilizer | 1.043*** | 1.041*** | 1.042*** | 1.038*** | 1.038*** | 1.039*** | 1.039*** | 1.049*** | 1.048*** | 1.050*** | 1.046*** | 1.046*** | 1.046*** | 1.046*** |
|  | (0.0551) | (0.0550) | (0.0552) | (0.0550) | (0.0550) | (0.0549) | (0.0552) | (0.0554) | (0.0551) | (0.0555) | (0.0552) | (0.0552) | (0.0551) | (0.0555) |
|  |  |  |  |  |  |  |  |  |  |  |  |  |  |  |
| Heroine | 0.502*** | 0.583*** | 0.554*** | 0.618*** | 0.618*** | 0.600*** | 0.562*** | 0.470** | 0.566*** | 0.546*** | 0.608*** | 0.609*** | 0.588*** | 0.529*** |
|  | (0.146) | (0.147) | (0.146) | (0.145) | (0.145) | (0.144) | (0.144) | (0.146) | (0.148) | (0.145) | (0.145) | (0.145) | (0.144) | (0.145) |
|  |  |  |  |  |  |  |  |  |  |  |  |  |  |  |
| Pain Killers | 0.356*** | 0.356*** | 0.360*** | 0.355*** | 0.355*** | 0.355*** | 0.355*** | 0.352*** | 0.357*** | 0.363*** | 0.358*** | 0.358*** | 0.358*** | 0.352*** |
|  | (0.0635) | (0.0635) | (0.0636) | (0.0637) | (0.0637) | (0.0636) | (0.0636) | (0.0634) | (0.0635) | (0.0634) | (0.0636) | (0.0636) | (0.0634) | (0.0634) |
|  |  |  |  |  |  |  |  |  |  |  |  |  |  |  |
| Marijuana | 0.407*** | 0.411*** | 0.410*** | 0.415*** | 0.414*** | 0.411*** | 0.406*** | 0.410*** | 0.413*** | 0.412*** | 0.416*** | 0.415*** | 0.412*** | 0.407*** |
|  | (0.0692) | (0.0696) | (0.0695) | (0.0695) | (0.0695) | (0.0697) | (0.0692) | (0.0690) | (0.0695) | (0.0694) | (0.0693) | (0.0693) | (0.0695) | (0.0690) |
|  |  |  |  |  |  |  |  |  |  |  |  |  |  |  |
| PCP | -0.118 | 0.0181 | 0.00361 | 0.0319 | 0.0303 | 0.0195 | -0.00347 | -0.143 | 0.0224 | 0.00328 | 0.0354 | 0.0336 | 0.0117 | -0.0353 |
|  | (0.178) | (0.179) | (0.179) | (0.179) | (0.179) | (0.178) | (0.177) | (0.178) | (0.178) | (0.179) | (0.178) | (0.179) | (0.177) | (0.178) |
|  |  |  |  |  |  |  |  |  |  |  |  |  |  |  |
| Inhalants | 0.548*** | 0.562*** | 0.563*** | 0.559*** | 0.559*** | 0.562*** | 0.566*** | 0.551*** | 0.562*** | 0.562*** | 0.557*** | 0.557*** | 0.561*** | 0.568*** |
|  | (0.0743) | (0.0741) | (0.0742) | (0.0743) | (0.0743) | (0.0741) | (0.0740) | (0.0738) | (0.0740) | (0.0737) | (0.0740) | (0.0740) | (0.0740) | (0.0737) |
|  |  |  |  |  |  |  |  |  |  |  |  |  |  |  |
| Tobacco | 0.427*** | 0.416*** | 0.420*** | 0.414*** | 0.414*** | 0.417*** | 0.420*** | 0.431*** | 0.417*** | 0.422*** | 0.415*** | 0.414*** | 0.419*** | 0.424*** |
|  | (0.0551) | (0.0549) | (0.0550) | (0.0548) | (0.0549) | (0.0551) | (0.0549) | (0.0550) | (0.0549) | (0.0550) | (0.0549) | (0.0549) | (0.0551) | (0.0549) |
|  |  |  |  |  |  |  |  |  |  |  |  |  |  |  |
| Age of 1st Alcohol Use | -0.0301 | -0.0324 | -0.0313 | -0.0348 | -0.0350 | -0.0332 | -0.0319 | -0.0303 | -0.0344 | -0.0334 | -0.0369 | -0.0370 | -0.0352 | -0.0323 |
|  | (0.0281) | (0.0279) | (0.0280) | (0.0281) | (0.0280) | (0.0281) | (0.0281) | (0.0281) | (0.0278) | (0.0280) | (0.0279) | (0.0279) | (0.0280) | (0.0280) |
|  |  |  |  |  |  |  |  |  |  |  |  |  |  |  |
| Risky Behaviors | 0.661*** | 0.661*** | 0.662*** | 0.662*** | 0.662*** | 0.663*** | 0.663*** | 0.660*** | 0.661*** | 0.662*** | 0.663*** | 0.663*** | 0.662*** | 0.662*** |
|  | (0.0309) | (0.0308) | (0.0309) | (0.0308) | (0.0308) | (0.0308) | (0.0308) | (0.0307) | (0.0306) | (0.0308) | (0.0306) | (0.0306) | (0.0306) | (0.0307) |
|  |  |  |  |  |  |  |  |  |  |  |  |  |  |  |
| f2009 | -0.0513 | -0.0463 | -0.0488 | -0.0461 | -0.0462 | -0.0482 | -0.0488 | -0.0473 | -0.0431 | -0.0438 | -0.0419 | -0.0421 | -0.0441 | -0.0439 |
|  | (0.120) | (0.121) | (0.120) | (0.121) | (0.121) | (0.121) | (0.120) | (0.120) | (0.120) | (0.120) | (0.121) | (0.121) | (0.121) | (0.120) |
|  |  |  |  |  |  |  |  |  |  |  |  |  |  |  |
| 2010 | 0.0314 | 0.0342 | 0.0331 | 0.0333 | 0.0334 | 0.0316 | 0.0323 | 0.0306 | 0.0321 | 0.0310 | 0.0309 | 0.0307 | 0.0289 | 0.0317 |
|  | (0.117) | (0.118) | (0.117) | (0.118) | (0.118) | (0.118) | (0.117) | (0.118) | (0.118) | (0.118) | (0.118) | (0.118) | (0.118) | (0.118) |
|  |  |  |  |  |  |  |  |  |  |  |  |  |  |  |
| 2011 | 0.0319 | 0.0350 | 0.0353 | 0.0362 | 0.0362 | 0.0347 | 0.0361 | 0.0316 | 0.0343 | 0.0356 | 0.0365 | 0.0365 | 0.0347 | 0.0374 |
|  | (0.116) | (0.117) | (0.117) | (0.117) | (0.117) | (0.117) | (0.117) | (0.116) | (0.116) | (0.117) | (0.117) | (0.117) | (0.117) | (0.116) |
|  |  |  |  |  |  |  |  |  |  |  |  |  |  |  |
| 2012 | 0.136 | 0.139 | 0.139 | 0.139 | 0.139 | 0.139 | 0.139 | 0.141 | 0.144 | 0.144 | 0.144 | 0.144 | 0.144 | 0.144 |
|  | (0.117) | (0.119) | (0.119) | (0.119) | (0.119) | (0.119) | (0.118) | (0.118) | (0.119) | (0.119) | (0.119) | (0.119) | (0.119) | (0.119) |
|  |  |  |  |  |  |  |  |  |  |  |  |  |  |  |
| 2013 | 0.259† | 0.260† | 0.261† | 0.260† | 0.260† | 0.258† | 0.261† | 0.261† | 0.258† | 0.261† | 0.261† | 0.261† | 0.258† | 0.264† |
|  | (0.141) | (0.142) | (0.142) | (0.142) | (0.142) | (0.142) | (0.141) | (0.141) | (0.142) | (0.142) | (0.142) | (0.142) | (0.142) | (0.141) |
|  |  |  |  |  |  |  |  |  |  |  |  |  |  |  |
| 2014 | 0.0602 | 0.0646 | 0.0576 | 0.0630 | 0.0624 | 0.0589 | 0.0592 | 0.0575 | 0.0617 | 0.0560 | 0.0608 | 0.0603 | 0.0574 | 0.0568 |
|  | (0.105) | (0.105) | (0.105) | (0.105) | (0.105) | (0.105) | (0.105) | (0.105) | (0.105) | (0.105) | (0.105) | (0.105) | (0.105) | (0.105) |
|  |  |  |  |  |  |  |  |  |  |  |  |  |  |  |
| 2015 | -0.350** | -0.348** | -0.353** | -0.347** | -0.347** | -0.351** | -0.350** | -0.348** | -0.349** | -0.354** | -0.349** | -0.349** | -0.353** | -0.347** |
|  | (0.118) | (0.119) | (0.119) | (0.119) | (0.119) | (0.119) | (0.118) | (0.118) | (0.118) | (0.118) | (0.118) | (0.118) | (0.118) | (0.117) |
|  |  |  |  |  |  |  |  |  |  |  |  |  |  |  |
| 2016 | -0.240* | -0.233* | -0.243* | -0.231* | -0.231* | -0.238* | -0.240* | -0.237* | -0.234* | -0.244* | -0.232* | -0.233* | -0.240* | -0.237* |
|  | (0.112) | (0.113) | (0.113) | (0.113) | (0.113) | (0.113) | (0.112) | (0.111) | (0.112) | (0.112) | (0.113) | (0.113) | (0.112) | (0.111) |
|  |  |  |  |  |  |  |  |  |  |  |  |  |  |  |
| 2017 | -0.102 | -0.101 | -0.110 | -0.0987 | -0.0988 | -0.105 | -0.105 | -0.102 | -0.102 | -0.113 | -0.101 | -0.102 | -0.109 | -0.103 |
|  | (0.119) | (0.119) | (0.119) | (0.119) | (0.119) | (0.119) | (0.119) | (0.119) | (0.119) | (0.119) | (0.119) | (0.119) | (0.119) | (0.119) |
|  |  |  |  |  |  |  |  |  |  |  |  |  |  |  |
| 2018 | 0.194 | 0.196 | 0.190 | 0.198 | 0.198 | 0.195 | 0.194 | 0.195 | 0.195 | 0.190 | 0.197 | 0.197 | 0.193 | 0.196 |
|  | (0.123) | (0.123) | (0.123) | (0.123) | (0.123) | (0.123) | (0.123) | (0.122) | (0.123) | (0.123) | (0.123) | (0.123) | (0.123) | (0.122) |
|  |  |  |  |  |  |  |  |  |  |  |  |  |  |  |
| 2019 | 0.502*** | 0.503*** | 0.498*** | 0.507*** | 0.506*** | 0.500*** | 0.499*** | 0.505*** | 0.505*** | 0.499*** | 0.507*** | 0.506*** | 0.499*** | 0.502*** |
|  | (0.128) | (0.128) | (0.128) | (0.128) | (0.128) | (0.128) | (0.128) | (0.128) | (0.127) | (0.127) | (0.128) | (0.128) | (0.128) | (0.127) |
|  |  |  |  |  |  |  |  |  |  |  |  |  |  |  |
| MDMA | 0.192* | 0.0256 | 0.170* | 0.154† | 0.155† | 0.163† | 0.172* | 0.191* | 0.552* | 0.169* | 0.153† | 0.153† | 0.160† | 0.173* |
|  | (0.0826) | (0.0874) | (0.0835) | (0.0841) | (0.0841) | (0.0843) | (0.0833) | (0.0825) | (0.267) | (0.0836) | (0.0842) | (0.0843) | (0.0845) | (0.0833) |
|  |  |  |  |  |  |  |  |  |  |  |  |  |  |  |
| LCPU | -0.382*** |  |  |  |  |  |  | 0.197 |  |  |  |  |  |  |
|  | (0.0747) |  |  |  |  |  |  | (0.195) |  |  |  |  |  |  |
|  |  |  |  |  |  |  |  |  |  |  |  |  |  |  |
| Priv Hlth Ins | -0.972*** | -0.982*** | -0.978*** | -0.991*** | -0.990*** | -0.991*** | -0.979*** | -0.989*** | -0.997*** | -0.996*** | -1.009*** | -1.009*** | -1.010*** | -0.996*** |
|  | (0.0625) | (0.0626) | (0.0626) | (0.0629) | (0.0629) | (0.0627) | (0.0625) | (0.0633) | (0.0631) | (0.0633) | (0.0636) | (0.0636) | (0.0634) | (0.0633) |
|  |  |  |  |  |  |  |  |  |  |  |  |  |  |  |
| Pub Hlth Ins | 0.0162 | 0.117† | 0.0725 | 0.170** | 0.169** | 0.126* | 0.0664 | 1.115*** | 1.230*** | 1.157*** | 1.162*** | 1.163*** | 1.171*** | 1.155*** |
|  | (0.0648) | (0.0604) | (0.0622) | (0.0580) | (0.0583) | (0.0607) | (0.0633) | (0.162) | (0.153) | (0.151) | (0.140) | (0.140) | (0.146) | (0.159) |
|  |  |  |  |  |  |  |  |  |  |  |  |  |  |  |
| Oth Hlth Ins | -0.599*** | -0.608*** | -0.609*** | -0.618*** | -0.618*** | -0.616*** | -0.608*** | -0.566*** | -0.575*** | -0.575*** | -0.588*** | -0.588*** | -0.584*** | -0.575*** |
|  | (0.147) | (0.146) | (0.146) | (0.146) | (0.146) | (0.146) | (0.146) | (0.148) | (0.147) | (0.147) | (0.147) | (0.147) | (0.147) | (0.147) |
|  |  |  |  |  |  |  |  |  |  |  |  |  |  |  |
| LCPU * Pub Hlth Ins | 0.931*** |  |  |  |  |  |  | 0.450 |  |  |  |  |  |  |
|  | (0.152) |  |  |  |  |  |  | (0.421) |  |  |  |  |  |  |
|  |  |  |  |  |  |  |  |  |  |  |  |  |  |  |
| Psilocybin |  | -0.260** | -0.449*** | -0.268** | -0.267** | -0.267** | -0.253** |  | -0.270** | -0.214 | -0.279** | -0.279** | -0.279** | -0.253** |
|  |  | (0.0848) | (0.0881) | (0.0846) | (0.0846) | (0.0844) | (0.0843) |  | (0.0845) | (0.231) | (0.0846) | (0.0846) | (0.0844) | (0.0842) |
|  |  |  |  |  |  |  |  |  |  |  |  |  |  |  |
| DMT |  | 0.606 | 0.645 | 0.602 | 0.514 | 0.611 | 0.643 |  | 0.606 | 0.639 | 0.541 | 0.491 | 0.605 | 0.656 |
|  |  | (0.583) | (0.586) | (0.606) | (0.597) | (0.587) | (0.585) |  | (0.582) | (0.587) | (1.245) | (0.599) | (0.585) | (0.583) |
|  |  |  |  |  |  |  |  |  |  |  |  |  |  |  |
| Ayahuasca |  | 1.277 | 1.283 | 1.337 | 0.717 | 1.279 | 1.281 |  | 1.288 | 1.267 | 1.373 | 4.504 | 1.285 | 1.279 |
|  |  | (1.703) | (1.691) | (1.759) | (1.971) | (1.703) | (1.691) |  | (1.716) | (1.690) | (1.786) | (6.732) | (1.704) | (1.690) |
|  |  |  |  |  |  |  |  |  |  |  |  |  |  |  |
| Peyote/Mescaline |  | -0.469*** | -0.508*** | -0.464*** | -0.464*** | -0.675*** | -0.498*** |  | -0.465*** | -0.506*** | -0.455*** | -0.456*** | -0.119 | -0.486*** |
|  |  | (0.125) | (0.124) | (0.125) | (0.125) | (0.142) | (0.124) |  | (0.125) | (0.124) | (0.124) | (0.125) | (0.443) | (0.124) |
|  |  |  |  |  |  |  |  |  |  |  |  |  |  |  |
| LSD |  | 0.131 | 0.127 | 0.133 | 0.133 | 0.131 | -0.0564 |  | 0.137 | 0.133 | 0.140† | 0.140† | 0.139† | 0.656** |
|  |  | (0.0827) | (0.0829) | (0.0828) | (0.0828) | (0.0828) | (0.0952) |  | (0.0831) | (0.0831) | (0.0830) | (0.0829) | (0.0824) | (0.203) |
|  |  |  |  |  |  |  |  |  |  |  |  |  |  |  |
| MDMA * Pub Hlth Ins |  | 0.601*** |  |  |  |  |  |  | -0.855 |  |  |  |  |  |
|  |  | (0.149) |  |  |  |  |  |  | (0.574) |  |  |  |  |  |
|  |  |  |  |  |  |  |  |  |  |  |  |  |  |  |
| Psilocybin * Pub Hlth Ins |  |  | 0.922*** |  |  |  |  |  |  | 0.188 |  |  |  |  |
|  |  |  | (0.172) |  |  |  |  |  |  | (0.507) |  |  |  |  |
|  |  |  |  |  |  |  |  |  |  |  |  |  |  |  |
| DMT * Pub Hlth Ins |  |  |  | -0.481 |  |  |  |  |  |  | 1.918 |  |  |  |
|  |  |  |  | (1.884) |  |  |  |  |  |  | (6.262) |  |  |  |
|  |  |  |  |  |  |  |  |  |  |  |  |  |  |  |
| Ayahuasca * Pub Hlth Ins |  |  |  |  | 3.530 |  |  |  |  |  |  | 3.303 |  |  |
|  |  |  |  |  | (3.009) |  |  |  |  |  |  | (3.147) |  |  |
|  |  |  |  |  |  |  |  |  |  |  |  |  |  |  |
| Peyote/Mescaline * Pub Hlth Ins |  |  |  |  |  | 0.712* |  |  |  |  |  |  | -0.155 |  |
|  |  |  |  |  |  | (0.276) |  |  |  |  |  |  | (0.773) |  |
|  |  |  |  |  |  |  |  |  |  |  |  |  |  |  |
| LSD * Pub Hlth Ins |  |  |  |  |  |  | 0.789*** |  |  |  |  |  |  | 0.142 |
|  |  |  |  |  |  |  | (0.169) |  |  |  |  |  |  | (0.460) |
|  |  |  |  |  |  |  |  |  |  |  |  |  |  |  |
| LCPU * Education |  |  |  |  |  |  |  | -0.191*** |  |  |  |  |  |  |
|  |  |  |  |  |  |  |  | (0.0557) |  |  |  |  |  |  |
|  |  |  |  |  |  |  |  |  |  |  |  |  |  |  |
| Pub Hlth Ins * Education |  |  |  |  |  |  |  | -0.403*** | -0.410*** | -0.402*** | -0.368*** | -0.368*** | -0.386*** | -0.398*** |
|  |  |  |  |  |  |  |  | (0.0585) | (0.0557) | (0.0551) | (0.0505) | (0.0506) | (0.0532) | (0.0582) |
|  |  |  |  |  |  |  |  |  |  |  |  |  |  |  |
| LCPU * Pub Hlth Ins * Education |  |  |  |  |  |  |  | 0.158 |  |  |  |  |  |  |
|  |  |  |  |  |  |  |  | (0.142) |  |  |  |  |  |  |
|  |  |  |  |  |  |  |  |  |  |  |  |  |  |  |
| MDMA * Education |  |  |  |  |  |  |  |  | -0.175* |  |  |  |  |  |
|  |  |  |  |  |  |  |  |  | (0.0833) |  |  |  |  |  |
|  |  |  |  |  |  |  |  |  |  |  |  |  |  |  |
| MDMA * Pub Hlth Ins * Education |  |  |  |  |  |  |  |  | 0.538* |  |  |  |  |  |
|  |  |  |  |  |  |  |  |  | (0.214) |  |  |  |  |  |
|  |  |  |  |  |  |  |  |  |  |  |  |  |  |  |
| Psilocybin * Education |  |  |  |  |  |  |  |  |  | -0.0817 |  |  |  |  |
|  |  |  |  |  |  |  |  |  |  | (0.0664) |  |  |  |  |
|  |  |  |  |  |  |  |  |  |  |  |  |  |  |  |
| Psilocybin * Pub Hlth Ins * Education |  |  |  |  |  |  |  |  |  | 0.276 |  |  |  |  |
|  |  |  |  |  |  |  |  |  |  | (0.171) |  |  |  |  |
|  |  |  |  |  |  |  |  |  |  |  |  |  |  |  |
| DMT * Education |  |  |  |  |  |  |  |  |  |  | 0.0138 |  |  |  |
|  |  |  |  |  |  |  |  |  |  |  | (0.467) |  |  |  |
|  |  |  |  |  |  |  |  |  |  |  |  |  |  |  |
| DMT * Pub Hlth Ins * Education |  |  |  |  |  |  |  |  |  |  | -0.909 |  |  |  |
|  |  |  |  |  |  |  |  |  |  |  | (2.480) |  |  |  |
|  |  |  |  |  |  |  |  |  |  |  |  |  |  |  |
| Ayahuasca * Education |  |  |  |  |  |  |  |  |  |  |  | -1.145 |  |  |
|  |  |  |  |  |  |  |  |  |  |  |  | (1.871) |  |  |
|  |  |  |  |  |  |  |  |  |  |  |  |  |  |  |
| Peyote/Mescaline * Education |  |  |  |  |  |  |  |  |  |  |  |  | -0.187 |  |
|  |  |  |  |  |  |  |  |  |  |  |  |  | (0.134) |  |
|  |  |  |  |  |  |  |  |  |  |  |  |  |  |  |
| Peyote/Mescaline * Pub Hlth Ins * Education |  |  |  |  |  |  |  |  |  |  |  |  | 0.312 |  |
|  |  |  |  |  |  |  |  |  |  |  |  |  | (0.265) |  |
|  |  |  |  |  |  |  |  |  |  |  |  |  |  |  |
| LSD * Education |  |  |  |  |  |  |  |  |  |  |  |  |  | -0.237*** |
|  |  |  |  |  |  |  |  |  |  |  |  |  |  | (0.0650) |
|  |  |  |  |  |  |  |  |  |  |  |  |  |  |  |
| LSD * Pub Hlth Ins * Education |  |  |  |  |  |  |  |  |  |  |  |  |  | 0.214 |
|  |  |  |  |  |  |  |  |  |  |  |  |  |  | (0.163) |
|  |  |  |  |  |  |  |  |  |  |  |  |  |  |  |
| Constant | 18.48*** | 18.44*** | 18.44*** | 18.46*** | 18.46*** | 18.46*** | 18.44*** | 18.00*** | 18.03*** | 18.05*** | 18.11*** | 18.11*** | 18.08*** | 17.98*** |
|  | (0.223) | (0.227) | (0.226) | (0.227) | (0.227) | (0.226) | (0.226) | (0.227) | (0.232) | (0.226) | (0.226) | (0.225) | (0.222) | (0.227) |
| Observations | 149002 | 149002 | 149002 | 149002 | 149002 | 149002 | 149002 | 149002 | 149002 | 149002 | 149002 | 149002 | 149002 | 149002 |
| *R*2 | 0.153 | 0.153 | 0.153 | 0.153 | 0.153 | 0.153 | 0.153 | 0.154 | 0.154 | 0.154 | 0.153 | 0.153 | 0.154 | 0.154 |

Standard errors in parentheses

Source: 2008-2019 National Survey of Drug Use and Health, n=484,732

aMen serve as the references category for Women

bSingle Serves as the reference category for Marital Statuses

cWhite, Non-Hispanic Serves as the reference category for race/ethnicity

dNI/AN = Native Indian or Alaskan Native

e NHOPI = Native Hawaiian or Pacific Islander

f2008 serves as the reference category for the year survey was taken

† *p* < .10, * *p* < .05, ** *p* < .01, *** *p* < .001

Supplemental Table 10. Weighted Multivariate Ordinary Least Square Regression Predicting Psychological Distress Among Whites with Private Health Insurance Interaction Terms

|  | Model 1 | Model 2 | Model 3 | Model 4 | Model 5 | Model 6 | Model 7 | Model 8 | Model 9 | Model 10 | Model 11 | Model 12 | Model 13 | Model 14 |
| --- | --- | --- | --- | --- | --- | --- | --- | --- | --- | --- | --- | --- | --- | --- |
| Age | -0.636*** | -0.632*** | -0.632*** | -0.632*** | -0.632*** | -0.632*** | -0.633*** | -0.635*** | -0.631*** | -0.632*** | -0.632*** | -0.632*** | -0.632*** | -0.631*** |
|  | (0.0151) | (0.0153) | (0.0153) | (0.0153) | (0.0153) | (0.0153) | (0.0153) | (0.0151) | (0.0153) | (0.0153) | (0.0153) | (0.0153) | (0.0153) | (0.0153) |
|  |  |  |  |  |  |  |  |  |  |  |  |  |  |  |
| Education | -0.343*** | -0.336*** | -0.336*** | -0.336*** | -0.336*** | -0.336*** | -0.337*** | -0.404*** | -0.399*** | -0.415*** | -0.366*** | -0.368*** | -0.393*** | -0.377*** |
|  | (0.0279) | (0.0284) | (0.0285) | (0.0284) | (0.0284) | (0.0284) | (0.0284) | (0.0570) | (0.0581) | (0.0558) | (0.0517) | (0.0504) | (0.0536) | (0.0556) |
|  |  |  |  |  |  |  |  |  |  |  |  |  |  |  |
| Family Income | -0.280*** | -0.282*** | -0.282*** | -0.281*** | -0.282*** | -0.282*** | -0.281*** | -0.281*** | -0.281*** | -0.281*** | -0.281*** | -0.281*** | -0.281*** | -0.282*** |
|  | (0.0175) | (0.0175) | (0.0174) | (0.0174) | (0.0175) | (0.0174) | (0.0174) | (0.0175) | (0.0174) | (0.0175) | (0.0175) | (0.0175) | (0.0174) | (0.0174) |
|  |  |  |  |  |  |  |  |  |  |  |  |  |  |  |
| aWomen | 0.965*** | 0.949*** | 0.950*** | 0.949*** | 0.949*** | 0.949*** | 0.950*** | 0.965*** | 0.950*** | 0.948*** | 0.950*** | 0.949*** | 0.948*** | 0.952*** |
|  | (0.0584) | (0.0577) | (0.0577) | (0.0577) | (0.0577) | (0.0577) | (0.0577) | (0.0581) | (0.0578) | (0.0574) | (0.0577) | (0.0577) | (0.0576) | (0.0575) |
|  |  |  |  |  |  |  |  |  |  |  |  |  |  |  |
| bMarried | -0.232** | -0.240** | -0.239** | -0.240** | -0.240** | -0.241** | -0.238** | -0.234** | -0.241** | -0.238** | -0.240** | -0.241** | -0.242** | -0.240** |
|  | (0.0737) | (0.0736) | (0.0738) | (0.0736) | (0.0736) | (0.0738) | (0.0738) | (0.0743) | (0.0741) | (0.0742) | (0.0737) | (0.0738) | (0.0740) | (0.0743) |
|  |  |  |  |  |  |  |  |  |  |  |  |  |  |  |
| Widowed | -0.370** | -0.381** | -0.379** | -0.381** | -0.381** | -0.382** | -0.378** | -0.366** | -0.380** | -0.380** | -0.381** | -0.382** | -0.381** | -0.371** |
|  | (0.135) | (0.134) | (0.135) | (0.134) | (0.134) | (0.135) | (0.135) | (0.135) | (0.134) | (0.134) | (0.134) | (0.134) | (0.134) | (0.135) |
|  |  |  |  |  |  |  |  |  |  |  |  |  |  |  |
| Divorced | 0.672*** | 0.664*** | 0.665*** | 0.664*** | 0.664*** | 0.664*** | 0.664*** | 0.670*** | 0.662*** | 0.665*** | 0.664*** | 0.663*** | 0.665*** | 0.663*** |
|  | (0.106) | (0.107) | (0.107) | (0.107) | (0.107) | (0.107) | (0.107) | (0.106) | (0.107) | (0.107) | (0.107) | (0.107) | (0.107) | (0.107) |
|  |  |  |  |  |  |  |  |  |  |  |  |  |  |  |
| Religious Salience | -0.0465*** | -0.0471*** | -0.0471*** | -0.0471*** | -0.0471*** | -0.0470*** | -0.0471*** | -0.0466*** | -0.0470*** | -0.0469*** | -0.0470*** | -0.0470*** | -0.0470*** | -0.0471*** |
|  | (0.0130) | (0.0129) | (0.0129) | (0.0130) | (0.0130) | (0.0129) | (0.0129) | (0.0130) | (0.0129) | (0.0129) | (0.0129) | (0.0129) | (0.0129) | (0.0129) |
|  |  |  |  |  |  |  |  |  |  |  |  |  |  |  |
| Religious Attendance | -0.111*** | -0.111*** | -0.111*** | -0.111*** | -0.111*** | -0.111*** | -0.111*** | -0.111*** | -0.111*** | -0.111*** | -0.111*** | -0.111*** | -0.110*** | -0.112*** |
|  | (0.0191) | (0.0191) | (0.0191) | (0.0191) | (0.0191) | (0.0191) | (0.0191) | (0.0191) | (0.0192) | (0.0191) | (0.0191) | (0.0191) | (0.0192) | (0.0190) |
|  |  |  |  |  |  |  |  |  |  |  |  |  |  |  |
| Cocaine | -0.0808 | -0.0595 | -0.0583 | -0.0599 | -0.0598 | -0.0605 | -0.0590 | -0.0856 | -0.0612 | -0.0604 | -0.0598 | -0.0605 | -0.0585 | -0.0655 |
|  | (0.0814) | (0.0812) | (0.0812) | (0.0810) | (0.0810) | (0.0809) | (0.0811) | (0.0814) | (0.0813) | (0.0813) | (0.0810) | (0.0810) | (0.0807) | (0.0809) |
|  |  |  |  |  |  |  |  |  |  |  |  |  |  |  |
| Stimulant | 0.551*** | 0.563*** | 0.562*** | 0.562*** | 0.563*** | 0.563*** | 0.562*** | 0.554*** | 0.564*** | 0.562*** | 0.564*** | 0.563*** | 0.564*** | 0.564*** |
|  | (0.0789) | (0.0787) | (0.0786) | (0.0786) | (0.0786) | (0.0786) | (0.0787) | (0.0788) | (0.0786) | (0.0786) | (0.0786) | (0.0786) | (0.0788) | (0.0785) |
|  |  |  |  |  |  |  |  |  |  |  |  |  |  |  |
| Sedative | 0.855*** | 0.874*** | 0.874*** | 0.873*** | 0.874*** | 0.873*** | 0.874*** | 0.856*** | 0.873*** | 0.873*** | 0.874*** | 0.875*** | 0.874*** | 0.876*** |
|  | (0.0810) | (0.0814) | (0.0814) | (0.0814) | (0.0814) | (0.0813) | (0.0813) | (0.0812) | (0.0816) | (0.0815) | (0.0816) | (0.0816) | (0.0813) | (0.0815) |
|  |  |  |  |  |  |  |  |  |  |  |  |  |  |  |
| Tranquilizer | 1.018*** | 1.016*** | 1.016*** | 1.016*** | 1.016*** | 1.016*** | 1.016*** | 1.017*** | 1.016*** | 1.017*** | 1.016*** | 1.016*** | 1.018*** | 1.015*** |
|  | (0.0675) | (0.0677) | (0.0678) | (0.0677) | (0.0677) | (0.0677) | (0.0678) | (0.0674) | (0.0675) | (0.0678) | (0.0677) | (0.0677) | (0.0677) | (0.0676) |
|  |  |  |  |  |  |  |  |  |  |  |  |  |  |  |
| Heroine | 0.745*** | 0.792*** | 0.785*** | 0.795*** | 0.795*** | 0.799*** | 0.782*** | 0.728*** | 0.776*** | 0.785*** | 0.796*** | 0.794*** | 0.791*** | 0.764*** |
|  | (0.168) | (0.168) | (0.167) | (0.166) | (0.166) | (0.166) | (0.167) | (0.167) | (0.168) | (0.165) | (0.165) | (0.166) | (0.166) | (0.166) |
|  |  |  |  |  |  |  |  |  |  |  |  |  |  |  |
| Pain Killers | 0.298*** | 0.302*** | 0.303*** | 0.302*** | 0.302*** | 0.302*** | 0.302*** | 0.292*** | 0.301*** | 0.302*** | 0.301*** | 0.302*** | 0.301*** | 0.295*** |
|  | (0.0703) | (0.0703) | (0.0702) | (0.0703) | (0.0703) | (0.0703) | (0.0704) | (0.0701) | (0.0707) | (0.0701) | (0.0703) | (0.0704) | (0.0705) | (0.0703) |
|  |  |  |  |  |  |  |  |  |  |  |  |  |  |  |
| Marijuana | 0.528*** | 0.521*** | 0.522*** | 0.521*** | 0.521*** | 0.521*** | 0.522*** | 0.526*** | 0.521*** | 0.522*** | 0.521*** | 0.521*** | 0.520*** | 0.519*** |
|  | (0.0752) | (0.0747) | (0.0749) | (0.0747) | (0.0746) | (0.0749) | (0.0749) | (0.0751) | (0.0747) | (0.0748) | (0.0746) | (0.0746) | (0.0748) | (0.0748) |
|  |  |  |  |  |  |  |  |  |  |  |  |  |  |  |
| PCP | -0.105 | 0.0250 | 0.0204 | 0.0261 | 0.0260 | 0.0284 | 0.0198 | -0.131 | 0.0280 | 0.0287 | 0.0220 | 0.0261 | 0.0236 | -0.0130 |
|  | (0.199) | (0.201) | (0.200) | (0.202) | (0.202) | (0.201) | (0.202) | (0.201) | (0.202) | (0.201) | (0.202) | (0.202) | (0.200) | (0.203) |
|  |  |  |  |  |  |  |  |  |  |  |  |  |  |  |
| Inhalants | 0.567*** | 0.585*** | 0.585*** | 0.585*** | 0.585*** | 0.585*** | 0.586*** | 0.571*** | 0.588*** | 0.584*** | 0.585*** | 0.585*** | 0.583*** | 0.591*** |
|  | (0.0859) | (0.0854) | (0.0853) | (0.0853) | (0.0853) | (0.0854) | (0.0855) | (0.0855) | (0.0852) | (0.0851) | (0.0853) | (0.0854) | (0.0856) | (0.0850) |
|  |  |  |  |  |  |  |  |  |  |  |  |  |  |  |
| Tobacco | 0.321*** | 0.315*** | 0.316*** | 0.315*** | 0.315*** | 0.314*** | 0.316*** | 0.323*** | 0.315*** | 0.314*** | 0.315*** | 0.315*** | 0.314*** | 0.319*** |
|  | (0.0665) | (0.0662) | (0.0663) | (0.0661) | (0.0661) | (0.0661) | (0.0661) | (0.0665) | (0.0662) | (0.0664) | (0.0662) | (0.0662) | (0.0659) | (0.0662) |
|  |  |  |  |  |  |  |  |  |  |  |  |  |  |  |
| Age of 1st Alcohol Use | -0.0124 | -0.0129 | -0.0124 | -0.0130 | -0.0130 | -0.0133 | -0.0122 | -0.0111 | -0.0128 | -0.0132 | -0.0131 | -0.0131 | -0.0135 | -0.0107 |
|  | (0.0319) | (0.0317) | (0.0318) | (0.0317) | (0.0317) | (0.0318) | (0.0317) | (0.0321) | (0.0319) | (0.0320) | (0.0317) | (0.0317) | (0.0318) | (0.0318) |
|  |  |  |  |  |  |  |  |  |  |  |  |  |  |  |
| Risky Behaviors | 0.586*** | 0.588*** | 0.588*** | 0.588*** | 0.588*** | 0.588*** | 0.588*** | 0.586*** | 0.588*** | 0.588*** | 0.588*** | 0.588*** | 0.588*** | 0.587*** |
|  | (0.0376) | (0.0377) | (0.0377) | (0.0377) | (0.0377) | (0.0377) | (0.0377) | (0.0376) | (0.0378) | (0.0377) | (0.0377) | (0.0377) | (0.0377) | (0.0377) |
|  |  |  |  |  |  |  |  |  |  |  |  |  |  |  |
| c2009 | -0.0914 | -0.0892 | -0.0895 | -0.0893 | -0.0893 | -0.0892 | -0.0891 | -0.0909 | -0.0888 | -0.0872 | -0.0894 | -0.0886 | -0.0875 | -0.0860 |
|  | (0.146) | (0.146) | (0.146) | (0.146) | (0.146) | (0.146) | (0.146) | (0.145) | (0.146) | (0.146) | (0.146) | (0.146) | (0.146) | (0.146) |
|  |  |  |  |  |  |  |  |  |  |  |  |  |  |  |
| 2010 | 0.0291 | 0.0307 | 0.0303 | 0.0305 | 0.0306 | 0.0309 | 0.0308 | 0.0329 | 0.0342 | 0.0330 | 0.0317 | 0.0325 | 0.0346 | 0.0370 |
|  | (0.132) | (0.132) | (0.132) | (0.132) | (0.132) | (0.132) | (0.132) | (0.132) | (0.132) | (0.132) | (0.132) | (0.132) | (0.132) | (0.132) |
|  |  |  |  |  |  |  |  |  |  |  |  |  |  |  |
| 2011 | 0.0444 | 0.0477 | 0.0474 | 0.0477 | 0.0478 | 0.0479 | 0.0478 | 0.0439 | 0.0486 | 0.0486 | 0.0485 | 0.0487 | 0.0488 | 0.0494 |
|  | (0.139) | (0.140) | (0.140) | (0.140) | (0.140) | (0.140) | (0.140) | (0.139) | (0.140) | (0.140) | (0.140) | (0.140) | (0.140) | (0.139) |
|  |  |  |  |  |  |  |  |  |  |  |  |  |  |  |
| 2012 | 0.0379 | 0.0426 | 0.0418 | 0.0424 | 0.0424 | 0.0428 | 0.0424 | 0.0371 | 0.0432 | 0.0431 | 0.0416 | 0.0426 | 0.0410 | 0.0440 |
|  | (0.135) | (0.136) | (0.136) | (0.136) | (0.136) | (0.136) | (0.136) | (0.135) | (0.136) | (0.136) | (0.136) | (0.136) | (0.136) | (0.136) |
|  |  |  |  |  |  |  |  |  |  |  |  |  |  |  |
| 2013 | 0.207 | 0.207 | 0.207 | 0.207 | 0.207 | 0.207 | 0.207 | 0.208 | 0.206 | 0.207 | 0.208 | 0.208 | 0.207 | 0.210 |
|  | (0.176) | (0.176) | (0.176) | (0.176) | (0.176) | (0.176) | (0.176) | (0.176) | (0.176) | (0.176) | (0.176) | (0.176) | (0.175) | (0.175) |
|  |  |  |  |  |  |  |  |  |  |  |  |  |  |  |
| 2014 | 0.0341 | 0.0333 | 0.0329 | 0.0331 | 0.0330 | 0.0333 | 0.0334 | 0.0314 | 0.0331 | 0.0332 | 0.0337 | 0.0333 | 0.0336 | 0.0333 |
|  | (0.127) | (0.128) | (0.127) | (0.127) | (0.127) | (0.127) | (0.127) | (0.127) | (0.128) | (0.128) | (0.127) | (0.127) | (0.127) | (0.127) |
|  |  |  |  |  |  |  |  |  |  |  |  |  |  |  |
| 2015 | -0.444** | -0.447** | -0.447** | -0.447** | -0.448** | -0.447** | -0.447** | -0.442** | -0.449** | -0.447** | -0.447** | -0.447** | -0.446** | -0.441** |
|  | (0.147) | (0.147) | (0.147) | (0.147) | (0.147) | (0.147) | (0.147) | (0.147) | (0.147) | (0.147) | (0.147) | (0.147) | (0.147) | (0.147) |
|  |  |  |  |  |  |  |  |  |  |  |  |  |  |  |
| 2016 | -0.219 | -0.227† | -0.227† | -0.227† | -0.227† | -0.227† | -0.227† | -0.217 | -0.227† | -0.226† | -0.226† | -0.226† | -0.227† | -0.223† |
|  | (0.133) | (0.133) | (0.133) | (0.133) | (0.133) | (0.133) | (0.133) | (0.133) | (0.133) | (0.133) | (0.133) | (0.133) | (0.133) | (0.133) |
|  |  |  |  |  |  |  |  |  |  |  |  |  |  |  |
| 2017 | -0.153 | -0.164 | -0.164 | -0.164 | -0.164 | -0.164 | -0.163 | -0.151 | -0.164 | -0.164 | -0.164 | -0.164 | -0.163 | -0.159 |
|  | (0.145) | (0.145) | (0.145) | (0.145) | (0.145) | (0.145) | (0.145) | (0.145) | (0.146) | (0.145) | (0.145) | (0.145) | (0.145) | (0.145) |
|  |  |  |  |  |  |  |  |  |  |  |  |  |  |  |
| 2018 | 0.127 | 0.119 | 0.118 | 0.119 | 0.118 | 0.119 | 0.119 | 0.128 | 0.119 | 0.119 | 0.119 | 0.119 | 0.120 | 0.123 |
|  | (0.145) | (0.145) | (0.145) | (0.145) | (0.145) | (0.144) | (0.145) | (0.144) | (0.145) | (0.144) | (0.144) | (0.144) | (0.144) | (0.144) |
|  |  |  |  |  |  |  |  |  |  |  |  |  |  |  |
| 2019 | 0.372** | 0.361* | 0.361* | 0.361* | 0.361* | 0.362* | 0.362* | 0.375** | 0.361* | 0.364** | 0.361* | 0.362* | 0.362** | 0.365** |
|  | (0.138) | (0.138) | (0.138) | (0.138) | (0.138) | (0.138) | (0.138) | (0.138) | (0.138) | (0.138) | (0.138) | (0.138) | (0.138) | (0.138) |
|  |  |  |  |  |  |  |  |  |  |  |  |  |  |  |
| MDMA | 0.0332 | 0.0511 | 0.0227 | 0.0238 | 0.0238 | 0.0241 | 0.0224 | 0.0406 | -0.503 | 0.0245 | 0.0232 | 0.0236 | 0.0253 | 0.0305 |
|  | (0.0972) | (0.162) | (0.0999) | (0.1000) | (0.1000) | (0.100) | (0.1000) | (0.0970) | (0.444) | (0.1000) | (0.1000) | (0.1000) | (0.100) | (0.0998) |
|  |  |  |  |  |  |  |  |  |  |  |  |  |  |  |
| LCPU | -0.0232 |  |  |  |  |  |  | -0.280 |  |  |  |  |  |  |
|  | (0.0988) |  |  |  |  |  |  | (0.295) |  |  |  |  |  |  |
|  |  |  |  |  |  |  |  |  |  |  |  |  |  |  |
| Priv Hlth Ins | -1.123*** | -1.162*** | -1.148*** | -1.168*** | -1.167*** | -1.174*** | -1.144*** | -1.469*** | -1.423*** | -1.424*** | -1.281*** | -1.288*** | -1.400*** | -1.432*** |
|  | (0.0830) | (0.0859) | (0.0827) | (0.0797) | (0.0796) | (0.0810) | (0.0783) | (0.214) | (0.210) | (0.209) | (0.187) | (0.185) | (0.200) | (0.208) |
|  |  |  |  |  |  |  |  |  |  |  |  |  |  |  |
| Pub Hlth Ins | 0.0855 | 0.0867 | 0.0869 | 0.0863 | 0.0865 | 0.0861 | 0.0864 | 0.0945 | 0.0926 | 0.0917 | 0.0899 | 0.0903 | 0.0912 | 0.0955 |
|  | (0.0785) | (0.0789) | (0.0789) | (0.0790) | (0.0789) | (0.0789) | (0.0789) | (0.0785) | (0.0789) | (0.0789) | (0.0788) | (0.0787) | (0.0789) | (0.0790) |
|  |  |  |  |  |  |  |  |  |  |  |  |  |  |  |
| Oth Hlth Ins | -0.931*** | -0.932*** | -0.930*** | -0.931*** | -0.931*** | -0.932*** | -0.930*** | -0.908*** | -0.915*** | -0.911*** | -0.917*** | -0.917*** | -0.914*** | -0.909*** |
|  | (0.195) | (0.194) | (0.194) | (0.194) | (0.194) | (0.194) | (0.194) | (0.194) | (0.193) | (0.193) | (0.193) | (0.193) | (0.193) | (0.193) |
|  |  |  |  |  |  |  |  |  |  |  |  |  |  |  |
| LCPU * Priv Hlth Ins | -0.177 |  |  |  |  |  |  | 0.878* |  |  |  |  |  |  |
|  | (0.115) |  |  |  |  |  |  | (0.433) |  |  |  |  |  |  |
|  |  |  |  |  |  |  |  |  |  |  |  |  |  |  |
| Psilocybin |  | -0.344*** | -0.271* | -0.345*** | -0.345*** | -0.344*** | -0.345*** |  | -0.341*** | -0.882* | -0.344*** | -0.344*** | -0.345*** | -0.330*** |
|  |  | (0.0967) | (0.136) | (0.0967) | (0.0968) | (0.0967) | (0.0967) |  | (0.0966) | (0.353) | (0.0967) | (0.0968) | (0.0968) | (0.0967) |
|  |  |  |  |  |  |  |  |  |  |  |  |  |  |  |
| DMT |  | 0.459 | 0.454 | 0.298 | 0.456 | 0.463 | 0.456 |  | 0.439 | 0.431 | 1.654 | 0.462 | 0.447 | 0.466 |
|  |  | (0.609) | (0.607) | (1.012) | (0.613) | (0.608) | (0.608) |  | (0.612) | (0.613) | (1.670) | (0.613) | (0.617) | (0.607) |
|  |  |  |  |  |  |  |  |  |  |  |  |  |  |  |
| Ayahuasca |  | 0.115 | 0.114 | 0.160 | 0.324 | 0.119 | 0.116 |  | 0.155 | 0.121 | 0.148 | 0.342 | 0.165 | 0.177 |
|  |  | (1.968) | (1.968) | (1.981) | (2.104) | (1.964) | (1.968) |  | (1.991) | (1.972) | (1.981) | (2.919) | (1.981) | (1.986) |
|  |  |  |  |  |  |  |  |  |  |  |  |  |  |  |
| Peyote/Mescaline |  | -0.547*** | -0.549*** | -0.547*** | -0.547*** | -0.601* | -0.547*** |  | -0.551*** | -0.554*** | -0.545*** | -0.547*** | -1.331† | -0.548*** |
|  |  | (0.146) | (0.146) | (0.146) | (0.146) | (0.254) | (0.146) |  | (0.147) | (0.146) | (0.147) | (0.146) | (0.681) | (0.146) |
|  |  |  |  |  |  |  |  |  |  |  |  |  |  |  |
| LSD |  | 0.272** | 0.272** | 0.273** | 0.273** | 0.272** | 0.354** |  | 0.272** | 0.271* | 0.274** | 0.274** | 0.271** | 0.248 |
|  |  | (0.103) | (0.103) | (0.103) | (0.103) | (0.103) | (0.133) |  | (0.103) | (0.103) | (0.103) | (0.103) | (0.102) | (0.325) |
|  |  |  |  |  |  |  |  |  |  |  |  |  |  |  |
| MDMA * Priv Hlth Ins |  | -0.0429 |  |  |  |  |  |  | 1.230* |  |  |  |  |  |
|  |  | (0.174) |  |  |  |  |  |  | (0.610) |  |  |  |  |  |
|  |  |  |  |  |  |  |  |  |  |  |  |  |  |  |
| Psilocybin * Priv Hlth Ins |  |  | -0.108 |  |  |  |  |  |  | 0.784 |  |  |  |  |
|  |  |  | (0.135) |  |  |  |  |  |  | (0.474) |  |  |  |  |
|  |  |  |  |  |  |  |  |  |  |  |  |  |  |  |
| DMT * Priv Hlth Ins |  |  |  | 0.294 |  |  |  |  |  |  | -3.649 |  |  |  |
|  |  |  |  | (1.148) |  |  |  |  |  |  | (2.500) |  |  |  |
|  |  |  |  |  |  |  |  |  |  |  |  |  |  |  |
| Ayahuasca * Priv Hlth Ins |  |  |  |  | -0.334 |  |  |  |  |  |  | -9.920 |  |  |
|  |  |  |  |  | (2.916) |  |  |  |  |  |  | (7.951) |  |  |
|  |  |  |  |  |  |  |  |  |  |  |  |  |  |  |
| Peyote/Mescaline * Priv Hlth Ins |  |  |  |  |  | 0.0877 |  |  |  |  |  |  | 1.560† |  |
|  |  |  |  |  |  | (0.267) |  |  |  |  |  |  | (0.911) |  |
|  |  |  |  |  |  |  |  |  |  |  |  |  |  |  |
| LSD * Priv Hlth Ins |  |  |  |  |  |  | -0.121 |  |  |  |  |  |  | 0.963† |
|  |  |  |  |  |  |  | (0.144) |  |  |  |  |  |  | (0.500) |
|  |  |  |  |  |  |  |  |  |  |  |  |  |  |  |
| LCPU * Education |  |  |  |  |  |  |  | 0.107 |  |  |  |  |  |  |
|  |  |  |  |  |  |  |  | (0.111) |  |  |  |  |  |  |
|  |  |  |  |  |  |  |  |  |  |  |  |  |  |  |
| Priv Hlth Ins * Education |  |  |  |  |  |  |  | 0.124† | 0.0967 | 0.105 | 0.0426 | 0.0455 | 0.0842 | 0.102 |
|  |  |  |  |  |  |  |  | (0.0693) | (0.0670) | (0.0671) | (0.0589) | (0.0578) | (0.0622) | (0.0670) |
|  |  |  |  |  |  |  |  |  |  |  |  |  |  |  |
| LCPU * Priv Hlth Ins * Education |  |  |  |  |  |  |  | -0.357* |  |  |  |  |  |  |
|  |  |  |  |  |  |  |  | (0.147) |  |  |  |  |  |  |
|  |  |  |  |  |  |  |  |  |  |  |  |  |  |  |
| MDMA * Education |  |  |  |  |  |  |  |  | 0.222 |  |  |  |  |  |
|  |  |  |  |  |  |  |  |  | (0.152) |  |  |  |  |  |
|  |  |  |  |  |  |  |  |  |  |  |  |  |  |  |
| MDMA * Priv Hlth Ins * Education |  |  |  |  |  |  |  |  | -0.446* |  |  |  |  |  |
|  |  |  |  |  |  |  |  |  | (0.203) |  |  |  |  |  |
|  |  |  |  |  |  |  |  |  |  |  |  |  |  |  |
| Psilocybin * Education |  |  |  |  |  |  |  |  |  | 0.242* |  |  |  |  |
|  |  |  |  |  |  |  |  |  |  | (0.119) |  |  |  |  |
|  |  |  |  |  |  |  |  |  |  |  |  |  |  |  |
| Psilocybin * Priv Hlth Ins * Education |  |  |  |  |  |  |  |  |  | -0.328* |  |  |  |  |
|  |  |  |  |  |  |  |  |  |  | (0.152) |  |  |  |  |
|  |  |  |  |  |  |  |  |  |  |  |  |  |  |  |
| DMT * Education |  |  |  |  |  |  |  |  |  |  | -0.467 |  |  |  |
|  |  |  |  |  |  |  |  |  |  |  | (0.716) |  |  |  |
|  |  |  |  |  |  |  |  |  |  |  |  |  |  |  |
| DMT * Priv Hlth Ins * Education |  |  |  |  |  |  |  |  |  |  | 1.284 |  |  |  |
|  |  |  |  |  |  |  |  |  |  |  | (0.929) |  |  |  |
|  |  |  |  |  |  |  |  |  |  |  |  |  |  |  |
| Ayahuasca * Education |  |  |  |  |  |  |  |  |  |  |  | -0.00438 |  |  |
|  |  |  |  |  |  |  |  |  |  |  |  | (1.244) |  |  |
|  |  |  |  |  |  |  |  |  |  |  |  |  |  |  |
| Ayahuasca * Priv Hlth Ins * Education |  |  |  |  |  |  |  |  |  |  |  | 2.640 |  |  |
|  |  |  |  |  |  |  |  |  |  |  |  | (1.842) |  |  |
|  |  |  |  |  |  |  |  |  |  |  |  |  |  |  |
| Peyote/Mescaline * Education |  |  |  |  |  |  |  |  |  |  |  |  | 0.291 |  |
|  |  |  |  |  |  |  |  |  |  |  |  |  | (0.233) |  |
|  |  |  |  |  |  |  |  |  |  |  |  |  |  |  |
| Peyote/Mescaline * Priv Hlth Ins * Education |  |  |  |  |  |  |  |  |  |  |  |  | -0.528* |  |
|  |  |  |  |  |  |  |  |  |  |  |  |  | (0.108) |  |
|  |  |  |  |  |  |  |  |  |  |  |  |  |  |  |
| LSD * Education |  |  |  |  |  |  |  |  |  |  |  |  |  | 0.0451 |
|  |  |  |  |  |  |  |  |  |  |  |  |  |  | (0.123) |
|  |  |  |  |  |  |  |  |  |  |  |  |  |  |  |
| LSD * Priv Hlth Ins * Education |  |  |  |  |  |  |  |  |  |  |  |  |  | -0.358* |
|  |  |  |  |  |  |  |  |  |  |  |  |  |  | (0.164) |
|  |  |  |  |  |  |  |  |  |  |  |  |  |  |  |
| Constant | 19.70*** | 19.67*** | 19.66*** | 19.68*** | 19.68*** | 19.68*** | 19.66*** | 19.82*** | 19.81*** | 19.85*** | 19.75*** | 19.75*** | 19.81*** | 19.74*** |
|  | (0.264) | (0.267) | (0.265) | (0.265) | (0.265) | (0.264) | (0.266) | (0.297) | (0.303) | (0.298) | (0.290) | (0.289) | (0.295) | (0.300) |
| Observations | 97184 | 97184 | 97184 | 97184 | 97184 | 97184 | 97184 | 97184 | 97184 | 97184 | 97184 | 97184 | 97184 | 97184 |
| *R*2 | 0.165 | 0.166 | 0.166 | 0.166 | 0.166 | 0.166 | 0.166 | 0.165 | 0.166 | 0.166 | 0.166 | 0.166 | 0.166 | 0.166 |

Standard errors in parentheses

Source: 2008-2019 National Survey of Drug Use and Health, n=484,732

aMen serve as the references category for Women

bSingle Serves as the reference category for Marital Statuses

c2008 serves as the reference category for the year survey was taken

† *p* < .10, * *p* < .05, ** *p* < .01, *** *p* < .001

Supplemental Table 11. Weighted Multivariate Ordinary Least Square Regression Predicting Psychological Distress Among Whites with Public Health Insurance Interaction Terms

|  | Model 1 | Model 2 | Model 3 | Model 4 | Model 5 | Model 6 | Model 7 | Model 8 | Model 9 | Model 10 | Model 11 | Model 12 | Model 13 | Model 14 |
| --- | --- | --- | --- | --- | --- | --- | --- | --- | --- | --- | --- | --- | --- | --- |
| Age | -0.626*** | -0.627*** | -0.625*** | -0.632*** | -0.632*** | -0.630*** | -0.625*** | -0.627*** | -0.627*** | -0.626*** | -0.632*** | -0.632*** | -0.630*** | -0.626*** |
|  | (0.0150) | (0.0153) | (0.0152) | (0.0153) | (0.0153) | (0.0151) | (0.0153) | (0.0150) | (0.0153) | (0.0152) | (0.0153) | (0.0153) | (0.0151) | (0.0153) |
|  |  |  |  |  |  |  |  |  |  |  |  |  |  |  |
| Education | -0.352*** | -0.338*** | -0.342*** | -0.336*** | -0.336*** | -0.339*** | -0.343*** | -0.203*** | -0.205*** | -0.222*** | -0.218*** | -0.218*** | -0.218*** | -0.190*** |
|  | (0.0278) | (0.0285) | (0.0285) | (0.0284) | (0.0284) | (0.0285) | (0.0283) | (0.0318) | (0.0349) | (0.0340) | (0.0335) | (0.0332) | (0.0327) | (0.0324) |
|  |  |  |  |  |  |  |  |  |  |  |  |  |  |  |
| Family Income | -0.280*** | -0.283*** | -0.282*** | -0.282*** | -0.282*** | -0.281*** | -0.282*** | -0.277*** | -0.278*** | -0.277*** | -0.277*** | -0.277*** | -0.276*** | -0.278*** |
|  | (0.0175) | (0.0175) | (0.0174) | (0.0174) | (0.0174) | (0.0174) | (0.0174) | (0.0175) | (0.0175) | (0.0174) | (0.0175) | (0.0175) | (0.0175) | (0.0174) |
|  |  |  |  |  |  |  |  |  |  |  |  |  |  |  |
| aWomen | 0.967*** | 0.944*** | 0.947*** | 0.949*** | 0.949*** | 0.952*** | 0.952*** | 0.960*** | 0.936*** | 0.937*** | 0.940*** | 0.940*** | 0.942*** | 0.946*** |
|  | (0.0578) | (0.0578) | (0.0574) | (0.0577) | (0.0577) | (0.0575) | (0.0572) | (0.0578) | (0.0580) | (0.0572) | (0.0579) | (0.0578) | (0.0575) | (0.0572) |
|  |  |  |  |  |  |  |  |  |  |  |  |  |  |  |
| bMarried | -0.241** | -0.248** | -0.245** | -0.240** | -0.240** | -0.239** | -0.243** | -0.241** | -0.249*** | -0.246** | -0.241** | -0.241** | -0.241** | -0.243** |
|  | (0.0737) | (0.0735) | (0.0736) | (0.0736) | (0.0735) | (0.0735) | (0.0737) | (0.0737) | (0.0736) | (0.0736) | (0.0736) | (0.0735) | (0.0734) | (0.0739) |
|  |  |  |  |  |  |  |  |  |  |  |  |  |  |  |
| Widowed | -0.326* | -0.367** | -0.349* | -0.381** | -0.381** | -0.369** | -0.348* | -0.354** | -0.399** | -0.382** | -0.411** | -0.411** | -0.400** | -0.374** |
|  | (0.135) | (0.134) | (0.135) | (0.134) | (0.134) | (0.135) | (0.135) | (0.135) | (0.135) | (0.135) | (0.134) | (0.134) | (0.134) | (0.135) |
|  |  |  |  |  |  |  |  |  |  |  |  |  |  |  |
| Divorced | 0.649*** | 0.655*** | 0.648*** | 0.664*** | 0.664*** | 0.659*** | 0.650*** | 0.662*** | 0.666*** | 0.661*** | 0.675*** | 0.675*** | 0.671*** | 0.664*** |
|  | (0.106) | (0.107) | (0.107) | (0.107) | (0.107) | (0.106) | (0.106) | (0.106) | (0.107) | (0.107) | (0.107) | (0.107) | (0.107) | (0.106) |
|  |  |  |  |  |  |  |  |  |  |  |  |  |  |  |
| Religious Salience | -0.0471*** | -0.0477*** | -0.0472*** | -0.0471*** | -0.0470*** | -0.0470*** | -0.0475*** | -0.0476*** | -0.0483*** | -0.0477*** | -0.0475*** | -0.0475*** | -0.0474*** | -0.0479*** |
|  | (0.0131) | (0.0130) | (0.0130) | (0.0130) | (0.0130) | (0.0129) | (0.0130) | (0.0130) | (0.0129) | (0.0130) | (0.0129) | (0.0129) | (0.0129) | (0.0129) |
|  |  |  |  |  |  |  |  |  |  |  |  |  |  |  |
| Religious Attendance | -0.113*** | -0.111*** | -0.113*** | -0.111*** | -0.111*** | -0.111*** | -0.112*** | -0.112*** | -0.110*** | -0.112*** | -0.109*** | -0.109*** | -0.110*** | -0.112*** |
|  | (0.0190) | (0.0191) | (0.0191) | (0.0191) | (0.0191) | (0.0191) | (0.0190) | (0.0190) | (0.0192) | (0.0191) | (0.0191) | (0.0191) | (0.0192) | (0.0190) |
|  |  |  |  |  |  |  |  |  |  |  |  |  |  |  |
| Cocaine | -0.0889 | -0.0575 | -0.0613 | -0.0598 | -0.0597 | -0.0621 | -0.0626 | -0.0860 | -0.0539 | -0.0582 | -0.0565 | -0.0568 | -0.0593 | -0.0616 |
|  | (0.0817) | (0.0814) | (0.0815) | (0.0810) | (0.0810) | (0.0810) | (0.0811) | (0.0817) | (0.0816) | (0.0818) | (0.0811) | (0.0811) | (0.0811) | (0.0810) |
|  |  |  |  |  |  |  |  |  |  |  |  |  |  |  |
| Stimulant | 0.560*** | 0.568*** | 0.567*** | 0.562*** | 0.563*** | 0.565*** | 0.567*** | 0.559*** | 0.568*** | 0.565*** | 0.563*** | 0.563*** | 0.563*** | 0.567*** |
|  | (0.0788) | (0.0788) | (0.0785) | (0.0785) | (0.0786) | (0.0787) | (0.0785) | (0.0787) | (0.0787) | (0.0785) | (0.0783) | (0.0785) | (0.0788) | (0.0783) |
|  |  |  |  |  |  |  |  |  |  |  |  |  |  |  |
| Sedative | 0.843*** | 0.869*** | 0.865*** | 0.874*** | 0.874*** | 0.875*** | 0.869*** | 0.851*** | 0.873*** | 0.869*** | 0.878*** | 0.879*** | 0.881*** | 0.877*** |
|  | (0.0811) | (0.0811) | (0.0818) | (0.0813) | (0.0814) | (0.0815) | (0.0815) | (0.0809) | (0.0809) | (0.0814) | (0.0811) | (0.0812) | (0.0808) | (0.0813) |
|  |  |  |  |  |  |  |  |  |  |  |  |  |  |  |
| Tranquilizer | 1.025*** | 1.022*** | 1.022*** | 1.016*** | 1.016*** | 1.019*** | 1.021*** | 1.031*** | 1.029*** | 1.031*** | 1.024*** | 1.025*** | 1.027*** | 1.027*** |
|  | (0.0677) | (0.0673) | (0.0679) | (0.0677) | (0.0678) | (0.0677) | (0.0678) | (0.0680) | (0.0674) | (0.0684) | (0.0680) | (0.0680) | (0.0680) | (0.0682) |
|  |  |  |  |  |  |  |  |  |  |  |  |  |  |  |
| Heroine | 0.680*** | 0.749*** | 0.725*** | 0.795*** | 0.797*** | 0.784*** | 0.741*** | 0.660*** | 0.736*** | 0.729*** | 0.788*** | 0.790*** | 0.779*** | 0.715*** |
|  | (0.166) | (0.167) | (0.165) | (0.166) | (0.166) | (0.165) | (0.163) | (0.165) | (0.167) | (0.163) | (0.166) | (0.165) | (0.164) | (0.163) |
|  |  |  |  |  |  |  |  |  |  |  |  |  |  |  |
| Pain Killers | 0.303*** | 0.306*** | 0.310*** | 0.303*** | 0.302*** | 0.303*** | 0.304*** | 0.303*** | 0.309*** | 0.316*** | 0.307*** | 0.306*** | 0.309*** | 0.302*** |
|  | (0.0701) | (0.0701) | (0.0702) | (0.0703) | (0.0703) | (0.0702) | (0.0703) | (0.0700) | (0.0704) | (0.0701) | (0.0702) | (0.0702) | (0.0701) | (0.0703) |
|  |  |  |  |  |  |  |  |  |  |  |  |  |  |  |
| Marijuana | 0.504*** | 0.515*** | 0.511*** | 0.521*** | 0.521*** | 0.515*** | 0.505*** | 0.509*** | 0.520*** | 0.514*** | 0.524*** | 0.524*** | 0.518*** | 0.509*** |
|  | (0.0743) | (0.0746) | (0.0745) | (0.0746) | (0.0747) | (0.0746) | (0.0739) | (0.0743) | (0.0745) | (0.0745) | (0.0744) | (0.0745) | (0.0745) | (0.0738) |
|  |  |  |  |  |  |  |  |  |  |  |  |  |  |  |
| PCP | -0.153 | 0.0136 | -0.00926 | 0.0264 | 0.0242 | 0.0190 | -0.00529 | -0.164 | 0.0226 | 0.00422 | 0.0325 | 0.0304 | 0.0287 | -0.0286 |
|  | (0.199) | (0.202) | (0.200) | (0.201) | (0.202) | (0.202) | (0.201) | (0.200) | (0.202) | (0.201) | (0.201) | (0.202) | (0.201) | (0.202) |
|  |  |  |  |  |  |  |  |  |  |  |  |  |  |  |
| Inhalants | 0.575*** | 0.588*** | 0.590*** | 0.585*** | 0.584*** | 0.588*** | 0.590*** | 0.576*** | 0.587*** | 0.586*** | 0.583*** | 0.582*** | 0.585*** | 0.592*** |
|  | (0.0860) | (0.0853) | (0.0852) | (0.0853) | (0.0853) | (0.0851) | (0.0851) | (0.0856) | (0.0853) | (0.0848) | (0.0852) | (0.0852) | (0.0850) | (0.0849) |
|  |  |  |  |  |  |  |  |  |  |  |  |  |  |  |
| Tobacco | 0.334*** | 0.318*** | 0.324*** | 0.315*** | 0.315*** | 0.319*** | 0.324*** | 0.340*** | 0.321*** | 0.326*** | 0.317*** | 0.317*** | 0.321*** | 0.330*** |
|  | (0.0667) | (0.0661) | (0.0660) | (0.0661) | (0.0661) | (0.0663) | (0.0661) | (0.0667) | (0.0662) | (0.0662) | (0.0661) | (0.0662) | (0.0662) | (0.0663) |
|  |  |  |  |  |  |  |  |  |  |  |  |  |  |  |
| Age of 1st Alcohol Use | -0.00635 | -0.00937 | -0.00771 | -0.0130 | -0.0133 | -0.0110 | -0.00839 | -0.00862 | -0.0130 | -0.0123 | -0.0165 | -0.0169 | -0.0149 | -0.0104 |
|  | (0.0319) | (0.0317) | (0.0318) | (0.0318) | (0.0317) | (0.0319) | (0.0318) | (0.0322) | (0.0318) | (0.0320) | (0.0318) | (0.0318) | (0.0320) | (0.0320) |
|  |  |  |  |  |  |  |  |  |  |  |  |  |  |  |
| Risky Behaviors | 0.587*** | 0.586*** | 0.588*** | 0.588*** | 0.588*** | 0.588*** | 0.590*** | 0.590*** | 0.590*** | 0.592*** | 0.592*** | 0.591*** | 0.592*** | 0.592*** |
|  | (0.0375) | (0.0377) | (0.0376) | (0.0376) | (0.0377) | (0.0377) | (0.0376) | (0.0373) | (0.0375) | (0.0375) | (0.0374) | (0.0375) | (0.0375) | (0.0375) |
|  |  |  |  |  |  |  |  |  |  |  |  |  |  |  |
| c2009 | -0.0936 | -0.0881 | -0.0913 | -0.0893 | -0.0896 | -0.0905 | -0.0902 | -0.0886 | -0.0838 | -0.0856 | -0.0842 | -0.0844 | -0.0853 | -0.0840 |
|  | (0.145) | (0.146) | (0.146) | (0.146) | (0.146) | (0.146) | (0.146) | (0.145) | (0.146) | (0.146) | (0.147) | (0.147) | (0.146) | (0.146) |
|  |  |  |  |  |  |  |  |  |  |  |  |  |  |  |
| 2010 | 0.0272 | 0.0312 | 0.0297 | 0.0306 | 0.0305 | 0.0291 | 0.0299 | 0.0278 | 0.0303 | 0.0287 | 0.0299 | 0.0303 | 0.0280 | 0.0314 |
|  | (0.131) | (0.132) | (0.132) | (0.132) | (0.132) | (0.132) | (0.132) | (0.131) | (0.132) | (0.132) | (0.132) | (0.132) | (0.132) | (0.132) |
|  |  |  |  |  |  |  |  |  |  |  |  |  |  |  |
| 2011 | 0.0466 | 0.0476 | 0.0489 | 0.0478 | 0.0476 | 0.0480 | 0.0501 | 0.0472 | 0.0489 | 0.0505 | 0.0491 | 0.0490 | 0.0497 | 0.0519 |
|  | (0.138) | (0.139) | (0.140) | (0.140) | (0.140) | (0.139) | (0.139) | (0.137) | (0.139) | (0.139) | (0.139) | (0.139) | (0.139) | (0.138) |
|  |  |  |  |  |  |  |  |  |  |  |  |  |  |  |
| 2012 | 0.0409 | 0.0422 | 0.0402 | 0.0424 | 0.0422 | 0.0440 | 0.0457 | 0.0499 | 0.0515 | 0.0499 | 0.0510 | 0.0510 | 0.0526 | 0.0547 |
|  | (0.135) | (0.136) | (0.137) | (0.136) | (0.136) | (0.136) | (0.136) | (0.136) | (0.137) | (0.137) | (0.136) | (0.136) | (0.136) | (0.137) |
|  |  |  |  |  |  |  |  |  |  |  |  |  |  |  |
| 2013 | 0.207 | 0.206 | 0.206 | 0.207 | 0.206 | 0.203 | 0.210 | 0.207 | 0.204 | 0.205 | 0.206 | 0.206 | 0.202 | 0.211 |
|  | (0.174) | (0.176) | (0.175) | (0.176) | (0.176) | (0.176) | (0.175) | (0.174) | (0.175) | (0.174) | (0.176) | (0.176) | (0.175) | (0.174) |
|  |  |  |  |  |  |  |  |  |  |  |  |  |  |  |
| 2014 | 0.0251 | 0.0347 | 0.0247 | 0.0330 | 0.0319 | 0.0273 | 0.0290 | 0.0229 | 0.0314 | 0.0238 | 0.0312 | 0.0297 | 0.0265 | 0.0271 |
|  | (0.127) | (0.127) | (0.127) | (0.127) | (0.127) | (0.127) | (0.127) | (0.127) | (0.127) | (0.127) | (0.127) | (0.127) | (0.127) | (0.127) |
|  |  |  |  |  |  |  |  |  |  |  |  |  |  |  |
| 2015 | -0.454** | -0.450** | -0.457** | -0.448** | -0.448** | -0.453** | -0.451** | -0.453** | -0.451** | -0.458** | -0.449** | -0.450** | -0.454** | -0.448** |
|  | (0.147) | (0.147) | (0.147) | (0.147) | (0.147) | (0.147) | (0.147) | (0.147) | (0.146) | (0.147) | (0.147) | (0.147) | (0.146) | (0.146) |
|  |  |  |  |  |  |  |  |  |  |  |  |  |  |  |
| 2016 | -0.237† | -0.232† | -0.245† | -0.227† | -0.228† | -0.235† | -0.237† | -0.233† | -0.230† | -0.244† | -0.226† | -0.227† | -0.235† | -0.232† |
|  | (0.132) | (0.133) | (0.133) | (0.133) | (0.133) | (0.133) | (0.132) | (0.131) | (0.133) | (0.133) | (0.133) | (0.133) | (0.132) | (0.132) |
|  |  |  |  |  |  |  |  |  |  |  |  |  |  |  |
| 2017 | -0.169 | -0.169 | -0.180 | -0.164 | -0.165 | -0.172 | -0.170 | -0.171 | -0.173 | -0.186 | -0.169 | -0.170 | -0.178 | -0.171 |
|  | (0.144) | (0.144) | (0.145) | (0.145) | (0.145) | (0.145) | (0.144) | (0.144) | (0.144) | (0.145) | (0.145) | (0.145) | (0.145) | (0.144) |
|  |  |  |  |  |  |  |  |  |  |  |  |  |  |  |
| 2018 | 0.111 | 0.114 | 0.106 | 0.119 | 0.118 | 0.114 | 0.112 | 0.113 | 0.113 | 0.105 | 0.119 | 0.118 | 0.113 | 0.115 |
|  | (0.143) | (0.144) | (0.144) | (0.145) | (0.145) | (0.144) | (0.144) | (0.143) | (0.144) | (0.144) | (0.144) | (0.144) | (0.144) | (0.143) |
|  |  |  |  |  |  |  |  |  |  |  |  |  |  |  |
| 2019 | 0.353* | 0.353* | 0.348* | 0.361* | 0.361* | 0.351* | 0.351* | 0.357* | 0.355* | 0.349* | 0.362** | 0.362** | 0.352* | 0.356* |
|  | (0.138) | (0.138) | (0.138) | (0.138) | (0.138) | (0.138) | (0.137) | (0.137) | (0.137) | (0.137) | (0.138) | (0.138) | (0.138) | (0.136) |
|  |  |  |  |  |  |  |  |  |  |  |  |  |  |  |
| MDMA | 0.0806 | -0.137 | 0.0519 | 0.0238 | 0.0246 | 0.0362 | 0.0501 | 0.0760 | 0.283 | 0.0477 | 0.0197 | 0.0203 | 0.0328 | 0.0478 |
|  | (0.0956) | (0.102) | (0.0993) | (0.1000) | (0.100) | (0.0999) | (0.0984) | (0.0953) | (0.322) | (0.0993) | (0.0998) | (0.0999) | (0.0997) | (0.0982) |
|  |  |  |  |  |  |  |  |  |  |  |  |  |  |  |
| LCPU | -0.382*** |  |  |  |  |  |  | 0.0490 |  |  |  |  |  |  |
|  | (0.0860) |  |  |  |  |  |  | (0.214) |  |  |  |  |  |  |
|  |  |  |  |  |  |  |  |  |  |  |  |  |  |  |
| Priv Hlth Ins | -1.135*** | -1.152*** | -1.145*** | -1.167*** | -1.167*** | -1.166*** | -1.147*** | -1.144*** | -1.161*** | -1.156*** | -1.180*** | -1.180*** | -1.179*** | -1.157*** |
|  | (0.0798) | (0.0794) | (0.0794) | (0.0796) | (0.0796) | (0.0795) | (0.0792) | (0.0809) | (0.0801) | (0.0802) | (0.0803) | (0.0803) | (0.0803) | (0.0801) |
|  |  |  |  |  |  |  |  |  |  |  |  |  |  |  |
| Pub Hlth Ins | -0.123 | 0.00988 | -0.0490 | 0.0867 | 0.0860 | 0.0318 | -0.0538 | 0.995*** | 1.157*** | 1.065*** | 1.129*** | 1.129*** | 1.118*** | 1.072*** |
|  | (0.0848) | (0.0813) | (0.0825) | (0.0785) | (0.0789) | (0.0786) | (0.0838) | (0.205) | (0.206) | (0.204) | (0.190) | (0.190) | (0.194) | (0.208) |
|  |  |  |  |  |  |  |  |  |  |  |  |  |  |  |
| Oth Hlth Ins | -0.897*** | -0.912*** | -0.909*** | -0.931*** | -0.931*** | -0.925*** | -0.908*** | -0.872*** | -0.886*** | -0.884*** | -0.908*** | -0.908*** | -0.902*** | -0.882*** |
|  | (0.196) | (0.194) | (0.194) | (0.194) | (0.194) | (0.194) | (0.195) | (0.197) | (0.194) | (0.195) | (0.195) | (0.195) | (0.194) | (0.196) |
|  |  |  |  |  |  |  |  |  |  |  |  |  |  |  |
| LCPU * Pub Hlth Ins | 1.081*** |  |  |  |  |  |  | 0.628 |  |  |  |  |  |  |
|  | (0.172) |  |  |  |  |  |  | (0.450) |  |  |  |  |  |  |
|  |  |  |  |  |  |  |  |  |  |  |  |  |  |  |
| Psilocybin |  | -0.336*** | -0.539*** | -0.345*** | -0.344*** | -0.347*** | -0.336*** |  | -0.350*** | -0.498† | -0.358*** | -0.358*** | -0.362*** | -0.339*** |
|  |  | (0.0971) | (0.0958) | (0.0967) | (0.0967) | (0.0965) | (0.0967) |  | (0.0970) | (0.274) | (0.0966) | (0.0967) | (0.0964) | (0.0965) |
|  |  |  |  |  |  |  |  |  |  |  |  |  |  |  |
| DMT |  | 0.527 | 0.562 | 0.479 | 0.399 | 0.524 | 0.558 |  | 0.525 | 0.552 | 0.578 | 0.396 | 0.512 | 0.568 |
|  |  | (0.605) | (0.607) | (0.599) | (0.615) | (0.610) | (0.608) |  | (0.604) | (0.609) | (1.328) | (0.617) | (0.611) | (0.604) |
|  |  |  |  |  |  |  |  |  |  |  |  |  |  |  |
| Ayahuasca |  | 0.106 | 0.0935 | 0.151 | -0.967 | 0.0997 | 0.105 |  | 0.0978 | 0.0710 | 0.177 | -5.575 | 0.0891 | 0.119 |
|  |  | (1.968) | (1.938) | (2.052) | (2.311) | (1.957) | (1.944) |  | (1.979) | (1.931) | (2.087) | (4.094) | (1.959) | (1.953) |
|  |  |  |  |  |  |  |  |  |  |  |  |  |  |  |
| Peyote/Mescaline |  | -0.553*** | -0.598*** | -0.547*** | -0.547*** | -0.758*** | -0.585*** |  | -0.549*** | -0.596*** | -0.540*** | -0.541*** | -0.606 | -0.573*** |
|  |  | (0.146) | (0.146) | (0.146) | (0.146) | (0.163) | (0.146) |  | (0.147) | (0.146) | (0.146) | (0.147) | (0.504) | (0.147) |
|  |  |  |  |  |  |  |  |  |  |  |  |  |  |  |
| LSD |  | 0.265* | 0.258* | 0.273** | 0.273** | 0.270** | 0.0730 |  | 0.273** | 0.265* | 0.281** | 0.281** | 0.278** | 0.691** |
|  |  | (0.103) | (0.103) | (0.103) | (0.103) | (0.103) | (0.110) |  | (0.103) | (0.103) | (0.103) | (0.103) | (0.102) | (0.226) |
|  |  |  |  |  |  |  |  |  |  |  |  |  |  |  |
| MDMA * Pub Hlth Ins |  | 0.888*** |  |  |  |  |  |  | -0.543 |  |  |  |  |  |
|  |  | (0.172) |  |  |  |  |  |  | (0.589) |  |  |  |  |  |
|  |  |  |  |  |  |  |  |  |  |  |  |  |  |  |
| Psilocybin * Pub Hlth Ins |  |  | 1.061*** |  |  |  |  |  |  | 0.352 |  |  |  |  |
|  |  |  | (0.188) |  |  |  |  |  |  | (0.560) |  |  |  |  |
|  |  |  |  |  |  |  |  |  |  |  |  |  |  |  |
| DMT * Pub Hlth Ins |  |  |  | -0.188 |  |  |  |  |  |  | 1.034 |  |  |  |
|  |  |  |  | (2.254) |  |  |  |  |  |  | (7.420) |  |  |  |
|  |  |  |  |  |  |  |  |  |  |  |  |  |  |  |
| Ayahuasca * Pub Hlth Ins |  |  |  |  | 5.362* |  |  |  |  |  |  | 6.003* |  |  |
|  |  |  |  |  | (2.152) |  |  |  |  |  |  | (2.792) |  |  |
|  |  |  |  |  |  |  |  |  |  |  |  |  |  |  |
| Peyote/Mescaline * Pub Hlth Ins |  |  |  |  |  | 0.756* |  |  |  |  |  |  | 0.0221 |  |
|  |  |  |  |  |  | (0.303) |  |  |  |  |  |  | (0.916) |  |
|  |  |  |  |  |  |  |  |  |  |  |  |  |  |  |
| LSD * Pub Hlth Ins |  |  |  |  |  |  | 0.893*** |  |  |  |  |  |  | 0.322 |
|  |  |  |  |  |  |  | (0.187) |  |  |  |  |  |  | (0.487) |
|  |  |  |  |  |  |  |  |  |  |  |  |  |  |  |
| LCPU * Education |  |  |  |  |  |  |  | -0.139* |  |  |  |  |  |  |
|  |  |  |  |  |  |  |  | (0.0645) |  |  |  |  |  |  |
|  |  |  |  |  |  |  |  |  |  |  |  |  |  |  |
| Pub Hlth Ins * Education |  |  |  |  |  |  |  | -0.392*** | -0.406*** | -0.397*** | -0.371*** | -0.371*** | -0.387*** | -0.394*** |
|  |  |  |  |  |  |  |  | (0.0693) | (0.0699) | (0.0690) | (0.0644) | (0.0644) | (0.0662) | (0.0712) |
|  |  |  |  |  |  |  |  |  |  |  |  |  |  |  |
| LCPU * Pub Hlth Ins * Education |  |  |  |  |  |  |  | 0.141 |  |  |  |  |  |  |
|  |  |  |  |  |  |  |  | (0.149) |  |  |  |  |  |  |
|  |  |  |  |  |  |  |  |  |  |  |  |  |  |  |
| MDMA * Education |  |  |  |  |  |  |  |  | -0.137 |  |  |  |  |  |
|  |  |  |  |  |  |  |  |  | (0.0972) |  |  |  |  |  |
|  |  |  |  |  |  |  |  |  |  |  |  |  |  |  |
| MDMA * Pub Hlth Ins * Education |  |  |  |  |  |  |  |  | 0.516* |  |  |  |  |  |
|  |  |  |  |  |  |  |  |  | (0.225) |  |  |  |  |  |
|  |  |  |  |  |  |  |  |  |  |  |  |  |  |  |
| Psilocybin * Education |  |  |  |  |  |  |  |  |  | -0.0174 |  |  |  |  |
|  |  |  |  |  |  |  |  |  |  | (0.0808) |  |  |  |  |
|  |  |  |  |  |  |  |  |  |  |  |  |  |  |  |
| Psilocybin * Pub Hlth Ins * Education |  |  |  |  |  |  |  |  |  | 0.260 |  |  |  |  |
|  |  |  |  |  |  |  |  |  |  | (0.183) |  |  |  |  |
|  |  |  |  |  |  |  |  |  |  |  |  |  |  |  |
| DMT * Education |  |  |  |  |  |  |  |  |  |  | -0.0352 |  |  |  |
|  |  |  |  |  |  |  |  |  |  |  | (0.478) |  |  |  |
|  |  |  |  |  |  |  |  |  |  |  |  |  |  |  |
| DMT * Pub Hlth Ins * Education |  |  |  |  |  |  |  |  |  |  | -0.475 |  |  |  |
|  |  |  |  |  |  |  |  |  |  |  | (2.927) |  |  |  |
|  |  |  |  |  |  |  |  |  |  |  |  |  |  |  |
| Ayahuasca * Education |  |  |  |  |  |  |  |  |  |  |  | 1.350 |  |  |
|  |  |  |  |  |  |  |  |  |  |  |  | (1.553) |  |  |
|  |  |  |  |  |  |  |  |  |  |  |  |  |  |  |
| Peyote/Mescaline * Education |  |  |  |  |  |  |  |  |  |  |  |  | -0.0483 |  |
|  |  |  |  |  |  |  |  |  |  |  |  |  | (0.146) |  |
|  |  |  |  |  |  |  |  |  |  |  |  |  |  |  |
| Peyote/Mescaline * Pub Hlth Ins * Education |  |  |  |  |  |  |  |  |  |  |  |  | 0.264 |  |
|  |  |  |  |  |  |  |  |  |  |  |  |  | (0.303) |  |
|  |  |  |  |  |  |  |  |  |  |  |  |  |  |  |
| LSD * Education |  |  |  |  |  |  |  |  |  |  |  |  |  | -0.201** |
|  |  |  |  |  |  |  |  |  |  |  |  |  |  | (0.0740) |
|  |  |  |  |  |  |  |  |  |  |  |  |  |  |  |
| LSD * Pub Hlth Ins * Education |  |  |  |  |  |  |  |  |  |  |  |  |  | 0.175 |
|  |  |  |  |  |  |  |  |  |  |  |  |  |  | (0.166) |
|  |  |  |  |  |  |  |  |  |  |  |  |  |  |  |
| Constant | 19.65*** | 19.63*** | 19.61*** | 19.68*** | 19.68*** | 19.66*** | 19.62*** | 19.17*** | 19.20*** | 19.23*** | 19.29*** | 19.30*** | 19.27*** | 19.13*** |
|  | (0.262) | (0.265) | (0.264) | (0.265) | (0.265) | (0.263) | (0.266) | (0.267) | (0.273) | (0.267) | (0.263) | (0.263) | (0.257) | (0.267) |
| Observations | 97184 | 97184 | 97184 | 97184 | 97184 | 97184 | 97184 | 97184 | 97184 | 97184 | 97184 | 97184 | 97184 | 97184 |
| *R*2 | 0.166 | 0.166 | 0.167 | 0.166 | 0.166 | 0.166 | 0.166 | 0.167 | 0.167 | 0.167 | 0.167 | 0.167 | 0.167 | 0.167 |

Standard errors in parentheses

Source: 2008-2019 National Survey of Drug Use and Health, n=484,732

aMen serve as the references category for Women

bSingle Serves as the reference category for Marital Statuses

c2008 serves as the reference category for the year survey was taken

† *p* < .10, * *p* < .05, ** *p* < .01, *** *p* < .001

Supplemental Table 12. Weighted Multivariate Ordinary Least Square Regression Predicting Psychological Distress Among Black People with Private Health Insurance Interaction Terms

|  | Model 1 | Model 2 | Model 3 | Model 4 | Model 5 | Model 6 | Model 7 | Model 8 | Model 9 | Model 10 | Model 11 | Model 12 | Model 13 | Model 14 |
| --- | --- | --- | --- | --- | --- | --- | --- | --- | --- | --- | --- | --- | --- | --- |
| Age | -0.517*** | -0.512*** | -0.513*** | -0.513*** | -0.513*** | -0.513*** | -0.514*** | -0.518*** | -0.515*** | -0.515*** | -0.515*** | -0.515*** | -0.514*** | -0.516*** |
|  | (0.0290) | (0.0291) | (0.0289) | (0.0290) | (0.0290) | (0.0289) | (0.0290) | (0.0291) | (0.0289) | (0.0289) | (0.0290) | (0.0290) | (0.0289) | (0.0290) |
|  |  |  |  |  |  |  |  |  |  |  |  |  |  |  |
| Education | -0.261*** | -0.266*** | -0.268*** | -0.268*** | -0.268*** | -0.271*** | -0.269*** | -0.371*** | -0.357*** | -0.316** | -0.341*** | -0.341*** | -0.343*** | -0.387*** |
|  | (0.0695) | (0.0696) | (0.0699) | (0.0698) | (0.0698) | (0.0699) | (0.0698) | (0.104) | (0.105) | (0.0982) | (0.0987) | (0.0987) | (0.0975) | (0.103) |
|  |  |  |  |  |  |  |  |  |  |  |  |  |  |  |
| Family Income | -0.308*** | -0.309*** | -0.309*** | -0.309*** | -0.309*** | -0.307*** | -0.308*** | -0.308*** | -0.310*** | -0.310*** | -0.310*** | -0.310*** | -0.308*** | -0.309*** |
|  | (0.0342) | (0.0340) | (0.0341) | (0.0341) | (0.0341) | (0.0343) | (0.0343) | (0.0342) | (0.0338) | (0.0338) | (0.0339) | (0.0339) | (0.0341) | (0.0343) |
|  |  |  |  |  |  |  |  |  |  |  |  |  |  |  |
| aWomen | 0.702*** | 0.722*** | 0.718*** | 0.719*** | 0.719*** | 0.719*** | 0.717*** | 0.699*** | 0.718*** | 0.714*** | 0.715*** | 0.715*** | 0.715*** | 0.716*** |
|  | (0.150) | (0.149) | (0.149) | (0.149) | (0.149) | (0.149) | (0.149) | (0.151) | (0.150) | (0.150) | (0.150) | (0.150) | (0.150) | (0.149) |
|  |  |  |  |  |  |  |  |  |  |  |  |  |  |  |
| bMarried | -0.119 | -0.116 | -0.124 | -0.125 | -0.125 | -0.123 | -0.122 | -0.114 | -0.112 | -0.128 | -0.122 | -0.122 | -0.121 | -0.115 |
|  | (0.176) | (0.174) | (0.176) | (0.175) | (0.175) | (0.176) | (0.176) | (0.175) | (0.174) | (0.176) | (0.175) | (0.175) | (0.175) | (0.175) |
|  |  |  |  |  |  |  |  |  |  |  |  |  |  |  |
| Widowed | -0.299 | -0.321 | -0.321 | -0.320 | -0.320 | -0.325 | -0.315 | -0.288 | -0.316 | -0.322 | -0.312 | -0.313 | -0.320 | -0.300 |
|  | (0.397) | (0.397) | (0.397) | (0.397) | (0.397) | (0.396) | (0.396) | (0.397) | (0.397) | (0.394) | (0.396) | (0.396) | (0.394) | (0.396) |
|  |  |  |  |  |  |  |  |  |  |  |  |  |  |  |
| Divorced | 0.108 | 0.117 | 0.117 | 0.118 | 0.118 | 0.110 | 0.117 | 0.112 | 0.122 | 0.126 | 0.126 | 0.126 | 0.117 | 0.117 |
|  | (0.218) | (0.217) | (0.217) | (0.217) | (0.217) | (0.218) | (0.217) | (0.216) | (0.216) | (0.215) | (0.216) | (0.216) | (0.217) | (0.215) |
|  |  |  |  |  |  |  |  |  |  |  |  |  |  |  |
| Religious Salience | -0.0924** | -0.0883** | -0.0888** | -0.0887** | -0.0887** | -0.0881** | -0.0881** | -0.0922** | -0.0884** | -0.0891** | -0.0888** | -0.0889** | -0.0882** | -0.0879** |
|  | (0.0321) | (0.0320) | (0.0320) | (0.0320) | (0.0320) | (0.0320) | (0.0320) | (0.0319) | (0.0319) | (0.0320) | (0.0320) | (0.0320) | (0.0320) | (0.0318) |
|  |  |  |  |  |  |  |  |  |  |  |  |  |  |  |
| Religious Attendance | -0.186*** | -0.180*** | -0.180*** | -0.180*** | -0.180*** | -0.180*** | -0.181*** | -0.184*** | -0.178*** | -0.179*** | -0.179*** | -0.178*** | -0.179*** | -0.179*** |
|  | (0.0417) | (0.0417) | (0.0417) | (0.0417) | (0.0417) | (0.0415) | (0.0414) | (0.0416) | (0.0416) | (0.0416) | (0.0417) | (0.0417) | (0.0416) | (0.0412) |
|  |  |  |  |  |  |  |  |  |  |  |  |  |  |  |
| Cocaine | -0.0343 | -0.119 | -0.106 | -0.109 | -0.109 | -0.0936 | -0.0984 | -0.0378 | -0.119 | -0.0998 | -0.110 | -0.109 | -0.0938 | -0.0948 |
|  | (0.241) | (0.239) | (0.239) | (0.238) | (0.238) | (0.239) | (0.238) | (0.241) | (0.239) | (0.237) | (0.238) | (0.238) | (0.239) | (0.239) |
|  |  |  |  |  |  |  |  |  |  |  |  |  |  |  |
| Stimulant | 0.751* | 0.694* | 0.701* | 0.696* | 0.696* | 0.702* | 0.702* | 0.747* | 0.693* | 0.711* | 0.699* | 0.697* | 0.701* | 0.693* |
|  | (0.292) | (0.294) | (0.293) | (0.294) | (0.294) | (0.294) | (0.292) | (0.292) | (0.293) | (0.293) | (0.294) | (0.294) | (0.294) | (0.291) |
|  |  |  |  |  |  |  |  |  |  |  |  |  |  |  |
| Sedative | 0.870*** | 0.924*** | 0.922*** | 0.922*** | 0.922*** | 0.926*** | 0.919*** | 0.872*** | 0.920*** | 0.910*** | 0.920*** | 0.920*** | 0.924*** | 0.923*** |
|  | (0.221) | (0.219) | (0.221) | (0.219) | (0.219) | (0.225) | (0.221) | (0.223) | (0.221) | (0.222) | (0.220) | (0.220) | (0.224) | (0.224) |
|  |  |  |  |  |  |  |  |  |  |  |  |  |  |  |
| Tranquilizer | 0.994*** | 0.959*** | 0.963*** | 0.961*** | 0.961*** | 0.965*** | 0.963*** | 0.996*** | 0.961*** | 0.960*** | 0.962*** | 0.962*** | 0.965*** | 0.970*** |
|  | (0.200) | (0.199) | (0.199) | (0.199) | (0.199) | (0.199) | (0.198) | (0.200) | (0.200) | (0.200) | (0.200) | (0.200) | (0.201) | (0.198) |
|  |  |  |  |  |  |  |  |  |  |  |  |  |  |  |
| Heroine | 0.212 | 0.403 | 0.351 | 0.368 | 0.368 | 0.308 | 0.339 | 0.240 | 0.408 | 0.353 | 0.380 | 0.374 | 0.323 | 0.359 |
|  | (0.609) | (0.611) | (0.608) | (0.606) | (0.606) | (0.607) | (0.603) | (0.619) | (0.612) | (0.608) | (0.606) | (0.606) | (0.613) | (0.607) |
|  |  |  |  |  |  |  |  |  |  |  |  |  |  |  |
| Pain Killers | 0.474* | 0.470* | 0.474* | 0.474* | 0.474* | 0.473* | 0.471* | 0.476* | 0.473* | 0.477* | 0.474* | 0.474* | 0.474* | 0.470* |
|  | (0.183) | (0.183) | (0.182) | (0.182) | (0.182) | (0.182) | (0.182) | (0.183) | (0.183) | (0.182) | (0.182) | (0.182) | (0.183) | (0.182) |
|  |  |  |  |  |  |  |  |  |  |  |  |  |  |  |
| Marijuana | -0.0218 | -0.0205 | -0.0180 | -0.0191 | -0.0191 | -0.0140 | -0.0187 | -0.0156 | -0.0164 | -0.0155 | -0.0145 | -0.0144 | -0.00940 | -0.0137 |
|  | (0.165) | (0.166) | (0.166) | (0.166) | (0.166) | (0.167) | (0.166) | (0.165) | (0.165) | (0.165) | (0.166) | (0.166) | (0.166) | (0.166) |
|  |  |  |  |  |  |  |  |  |  |  |  |  |  |  |
| PCP | -0.0691 | 0.105 | 0.0658 | 0.0756 | 0.0756 | -0.0274 | 0.0221 | -0.0655 | 0.107 | 0.0251 | 0.0749 | 0.0702 | -0.0436 | 0.0595 |
|  | (0.601) | (0.597) | (0.600) | (0.600) | (0.600) | (0.600) | (0.588) | (0.597) | (0.598) | (0.599) | (0.600) | (0.599) | (0.602) | (0.580) |
|  |  |  |  |  |  |  |  |  |  |  |  |  |  |  |
| Inhalants | 0.560† | 0.499 | 0.517† | 0.516† | 0.516† | 0.506† | 0.521† | 0.560† | 0.498 | 0.497 | 0.517† | 0.515† | 0.502 | 0.507† |
|  | (0.306) | (0.302) | (0.302) | (0.302) | (0.302) | (0.301) | (0.300) | (0.304) | (0.302) | (0.303) | (0.302) | (0.302) | (0.303) | (0.297) |
|  |  |  |  |  |  |  |  |  |  |  |  |  |  |  |
| Tobacco | 0.795*** | 0.784*** | 0.787*** | 0.785*** | 0.785*** | 0.790*** | 0.791*** | 0.790*** | 0.781*** | 0.786*** | 0.783*** | 0.783*** | 0.788*** | 0.785*** |
|  | (0.149) | (0.150) | (0.150) | (0.150) | (0.150) | (0.151) | (0.150) | (0.150) | (0.150) | (0.150) | (0.151) | (0.151) | (0.151) | (0.150) |
|  |  |  |  |  |  |  |  |  |  |  |  |  |  |  |
| Age of 1st Alcohol Use | -0.0363 | -0.0402 | -0.0373 | -0.0379 | -0.0379 | -0.0367 | -0.0369 | -0.0343 | -0.0381 | -0.0345 | -0.0353 | -0.0354 | -0.0340 | -0.0367 |
|  | (0.0662) | (0.0664) | (0.0663) | (0.0664) | (0.0664) | (0.0664) | (0.0662) | (0.0661) | (0.0660) | (0.0659) | (0.0661) | (0.0661) | (0.0661) | (0.0661) |
|  |  |  |  |  |  |  |  |  |  |  |  |  |  |  |
| Risky Behaviors | 0.751*** | 0.741*** | 0.742*** | 0.742*** | 0.742*** | 0.741*** | 0.741*** | 0.752*** | 0.741*** | 0.742*** | 0.742*** | 0.742*** | 0.741*** | 0.742*** |
|  | (0.0967) | (0.0964) | (0.0963) | (0.0963) | (0.0963) | (0.0963) | (0.0962) | (0.0971) | (0.0965) | (0.0964) | (0.0963) | (0.0963) | (0.0963) | (0.0964) |
|  |  |  |  |  |  |  |  |  |  |  |  |  |  |  |
| c2009 | -0.0426 | -0.0562 | -0.0556 | -0.0561 | -0.0561 | -0.0579 | -0.0507 | -0.0351 | -0.0497 | -0.0584 | -0.0522 | -0.0522 | -0.0510 | -0.0425 |
|  | (0.274) | (0.281) | (0.279) | (0.280) | (0.280) | (0.281) | (0.280) | (0.274) | (0.281) | (0.279) | (0.280) | (0.280) | (0.282) | (0.281) |
|  |  |  |  |  |  |  |  |  |  |  |  |  |  |  |
| 2010 | 0.254 | 0.249 | 0.252 | 0.252 | 0.252 | 0.249 | 0.256 | 0.258 | 0.255 | 0.254 | 0.255 | 0.255 | 0.257 | 0.258 |
|  | (0.332) | (0.331) | (0.329) | (0.329) | (0.329) | (0.330) | (0.329) | (0.331) | (0.331) | (0.329) | (0.329) | (0.329) | (0.329) | (0.329) |
|  |  |  |  |  |  |  |  |  |  |  |  |  |  |  |
| 2011 | 0.261 | 0.261 | 0.259 | 0.259 | 0.259 | 0.255 | 0.266 | 0.259 | 0.261 | 0.255 | 0.257 | 0.257 | 0.257 | 0.263 |
|  | (0.384) | (0.384) | (0.382) | (0.382) | (0.382) | (0.381) | (0.383) | (0.383) | (0.383) | (0.380) | (0.381) | (0.381) | (0.381) | (0.380) |
|  |  |  |  |  |  |  |  |  |  |  |  |  |  |  |
| 2012 | 0.983** | 0.964** | 0.980** | 0.976** | 0.976** | 0.985** | 0.976** | 0.984** | 0.965** | 0.972** | 0.973** | 0.972** | 0.984** | 0.980** |
|  | (0.329) | (0.327) | (0.326) | (0.327) | (0.327) | (0.328) | (0.327) | (0.329) | (0.328) | (0.327) | (0.328) | (0.328) | (0.330) | (0.327) |
|  |  |  |  |  |  |  |  |  |  |  |  |  |  |  |
| 2013 | 0.333 | 0.317 | 0.319 | 0.318 | 0.318 | 0.313 | 0.316 | 0.342 | 0.325 | 0.319 | 0.323 | 0.324 | 0.322 | 0.325 |
|  | (0.339) | (0.338) | (0.339) | (0.339) | (0.339) | (0.339) | (0.339) | (0.337) | (0.337) | (0.338) | (0.337) | (0.337) | (0.338) | (0.336) |
|  |  |  |  |  |  |  |  |  |  |  |  |  |  |  |
| 2014 | 0.479 | 0.463 | 0.466 | 0.465 | 0.465 | 0.465 | 0.467 | 0.488 | 0.469 | 0.465 | 0.470 | 0.470 | 0.471 | 0.476 |
|  | (0.304) | (0.305) | (0.306) | (0.306) | (0.306) | (0.306) | (0.306) | (0.305) | (0.305) | (0.306) | (0.305) | (0.305) | (0.306) | (0.305) |
|  |  |  |  |  |  |  |  |  |  |  |  |  |  |  |
| 2015 | -0.254 | -0.247 | -0.250 | -0.251 | -0.251 | -0.255 | -0.252 | -0.251 | -0.248 | -0.252 | -0.248 | -0.248 | -0.252 | -0.248 |
|  | (0.309) | (0.308) | (0.307) | (0.308) | (0.308) | (0.308) | (0.308) | (0.309) | (0.308) | (0.308) | (0.308) | (0.308) | (0.308) | (0.307) |
|  |  |  |  |  |  |  |  |  |  |  |  |  |  |  |
| 2016 | -0.145 | -0.166 | -0.162 | -0.165 | -0.165 | -0.164 | -0.159 | -0.139 | -0.169 | -0.180 | -0.168 | -0.168 | -0.167 | -0.151 |
|  | (0.285) | (0.283) | (0.284) | (0.283) | (0.283) | (0.284) | (0.284) | (0.286) | (0.282) | (0.286) | (0.283) | (0.283) | (0.286) | (0.284) |
|  |  |  |  |  |  |  |  |  |  |  |  |  |  |  |
| 2017 | 0.409 | 0.382 | 0.390 | 0.388 | 0.388 | 0.389 | 0.393 | 0.418 | 0.384 | 0.387 | 0.392 | 0.392 | 0.394 | 0.404 |
|  | (0.302) | (0.302) | (0.302) | (0.302) | (0.302) | (0.302) | (0.302) | (0.302) | (0.302) | (0.304) | (0.302) | (0.302) | (0.302) | (0.301) |
|  |  |  |  |  |  |  |  |  |  |  |  |  |  |  |
| 2018 | 0.637† | 0.611† | 0.612† | 0.612† | 0.612† | 0.622† | 0.615† | 0.646† | 0.617† | 0.615† | 0.619† | 0.619† | 0.629† | 0.625† |
|  | (0.348) | (0.350) | (0.350) | (0.350) | (0.350) | (0.353) | (0.350) | (0.348) | (0.350) | (0.350) | (0.350) | (0.350) | (0.353) | (0.349) |
|  |  |  |  |  |  |  |  |  |  |  |  |  |  |  |
| 2019 | 1.062** | 1.023** | 1.022** | 1.023** | 1.023** | 1.024** | 1.029** | 1.065** | 1.023** | 1.024** | 1.024** | 1.024** | 1.027** | 1.040** |
|  | (0.320) | (0.321) | (0.321) | (0.321) | (0.321) | (0.323) | (0.323) | (0.321) | (0.321) | (0.322) | (0.322) | (0.322) | (0.323) | (0.324) |
|  |  |  |  |  |  |  |  |  |  |  |  |  |  |  |
| MDMA | 0.519† | -0.0270 | 0.289 | 0.294 | 0.294 | 0.288 | 0.283 | 0.523† | -0.565 | 0.306 | 0.301 | 0.301 | 0.297 | 0.289 |
|  | (0.289) | (0.340) | (0.295) | (0.295) | (0.295) | (0.296) | (0.293) | (0.290) | (0.838) | (0.296) | (0.295) | (0.295) | (0.297) | (0.294) |
|  |  |  |  |  |  |  |  |  |  |  |  |  |  |  |
| LCPU | -0.186 |  |  |  |  |  |  | -1.181 |  |  |  |  |  |  |
|  | (0.453) |  |  |  |  |  |  | (1.109) |  |  |  |  |  |  |
|  |  |  |  |  |  |  |  |  |  |  |  |  |  |  |
| Priv Hlth Ins | -0.853*** | -0.949*** | -0.878*** | -0.890*** | -0.890*** | -0.860*** | -0.860*** | -1.365** | -1.373** | -1.195** | -1.279** | -1.280** | -1.240** | -1.402** |
|  | (0.169) | (0.183) | (0.171) | (0.169) | (0.169) | (0.171) | (0.167) | (0.453) | (0.444) | (0.422) | (0.422) | (0.422) | (0.426) | (0.445) |
|  |  |  |  |  |  |  |  |  |  |  |  |  |  |  |
| Pub Hlth Ins | 0.320† | 0.324† | 0.328† | 0.326† | 0.326† | 0.328† | 0.324† | 0.318† | 0.325† | 0.336† | 0.327† | 0.327† | 0.328† | 0.323† |
|  | (0.179) | (0.179) | (0.179) | (0.179) | (0.179) | (0.179) | (0.179) | (0.180) | (0.179) | (0.180) | (0.179) | (0.179) | (0.180) | (0.179) |
|  |  |  |  |  |  |  |  |  |  |  |  |  |  |  |
| Oth Hlth Ins | -0.468 | -0.504 | -0.502 | -0.501 | -0.501 | -0.486 | -0.502 | -0.460 | -0.494 | -0.460 | -0.488 | -0.488 | -0.474 | -0.484 |
|  | (0.434) | (0.439) | (0.440) | (0.439) | (0.439) | (0.438) | (0.440) | (0.435) | (0.440) | (0.433) | (0.439) | (0.439) | (0.439) | (0.438) |
|  |  |  |  |  |  |  |  |  |  |  |  |  |  |  |
| LCPU * Priv Hlth Ins | -0.532 |  |  |  |  |  |  | 0.726 |  |  |  |  |  |  |
|  | (0.586) |  |  |  |  |  |  | (1.806) |  |  |  |  |  |  |
|  |  |  |  |  |  |  |  |  |  |  |  |  |  |  |
| Psilocybin |  | 1.591*** | 1.847*** | 1.608*** | 1.608*** | 1.574*** | 1.613*** |  | 1.568*** | 4.365* | 1.602*** | 1.602*** | 1.555*** | 1.619*** |
|  |  | (0.453) | (0.543) | (0.454) | (0.454) | (0.457) | (0.456) |  | (0.453) | (1.811) | (0.454) | (0.454) | (0.455) | (0.452) |
|  |  |  |  |  |  |  |  |  |  |  |  |  |  |  |
| DMT |  | -2.090 | -2.610 | -2.399 | -2.399 | -3.051 | -2.657 |  | -2.113 | -2.573 | 43.24*** | -2.398 | -3.059 | -2.674 |
|  |  | (6.541) | (6.501) | (6.521) | (6.521) | (6.402) | (6.469) |  | (6.589) | (6.103) | (2.516) | (6.494) | (6.321) | (6.732) |
|  |  |  |  |  |  |  |  |  |  |  |  |  |  |  |
| Peyote/Mescaline |  | -1.080* | -1.100* | -1.084* | -1.084* | -0.309 | -1.104* |  | -1.076* | -1.093* | -1.076* | -1.073* | 0.0738 | -1.218* |
|  |  | (0.533) | (0.529) | (0.534) | (0.534) | (0.827) | (0.527) |  | (0.533) | (0.529) | (0.534) | (0.534) | (2.398) | (0.530) |
|  |  |  |  |  |  |  |  |  |  |  |  |  |  |  |
| LSD |  | -0.371 | -0.369 | -0.371 | -0.371 | -0.376 | -0.0450 |  | -0.367 | -0.351 | -0.371 | -0.368 | -0.363 | -1.988 |
|  |  | (0.420) | (0.418) | (0.419) | (0.419) | (0.415) | (0.541) |  | (0.422) | (0.417) | (0.420) | (0.420) | (0.413) | (1.199) |
|  |  |  |  |  |  |  |  |  |  |  |  |  |  |  |
| MDMA * Priv Hlth Ins |  | 0.823 |  |  |  |  |  |  | 1.190 |  |  |  |  |  |
|  |  | (0.545) |  |  |  |  |  |  | (1.190) |  |  |  |  |  |
|  |  |  |  |  |  |  |  |  |  |  |  |  |  |  |
| Psilocybin * Priv Hlth Ins |  |  | -0.492 |  |  |  |  |  |  | -3.788 |  |  |  |  |
|  |  |  | (0.773) |  |  |  |  |  |  | (2.577) |  |  |  |  |
|  |  |  |  |  |  |  |  |  |  |  |  |  |  |  |
| Peyote/Mescaline * Priv Hlth Ins |  |  |  |  |  | -1.575 |  |  |  |  |  |  | -2.691 |  |
|  |  |  |  |  |  | (0.997) |  |  |  |  |  |  | (2.593) |  |
|  |  |  |  |  |  |  |  |  |  |  |  |  |  |  |
| LSD * Priv Hlth Ins |  |  |  |  |  |  | -0.709 |  |  |  |  |  |  | 2.368 |
|  |  |  |  |  |  |  | (0.711) |  |  |  |  |  |  | (2.152) |
|  |  |  |  |  |  |  |  |  |  |  |  |  |  |  |
| LCPU * Education |  |  |  |  |  |  |  | 0.421 |  |  |  |  |  |  |
|  |  |  |  |  |  |  |  | (0.447) |  |  |  |  |  |  |
|  |  |  |  |  |  |  |  |  |  |  |  |  |  |  |
| Priv Hlth Ins * Education |  |  |  |  |  |  |  | 0.197 | 0.164 | 0.121 | 0.148 | 0.149 | 0.145 | 0.209 |
|  |  |  |  |  |  |  |  | (0.145) | (0.139) | (0.136) | (0.135) | (0.135) | (0.137) | (0.142) |
|  |  |  |  |  |  |  |  |  |  |  |  |  |  |  |
| LCPU * Priv Hlth Ins * Education |  |  |  |  |  |  |  | -0.510 |  |  |  |  |  |  |
|  |  |  |  |  |  |  |  | (0.646) |  |  |  |  |  |  |
|  |  |  |  |  |  |  |  |  |  |  |  |  |  |  |
| MDMA * Education |  |  |  |  |  |  |  |  | 0.234 |  |  |  |  |  |
|  |  |  |  |  |  |  |  |  | (0.341) |  |  |  |  |  |
|  |  |  |  |  |  |  |  |  |  |  |  |  |  |  |
| MDMA * Priv Hlth Ins * Education |  |  |  |  |  |  |  |  | -0.171 |  |  |  |  |  |
|  |  |  |  |  |  |  |  |  | (0.443) |  |  |  |  |  |
|  |  |  |  |  |  |  |  |  |  |  |  |  |  |  |
| Psilocybin * Education |  |  |  |  |  |  |  |  |  | -1.034 |  |  |  |  |
|  |  |  |  |  |  |  |  |  |  | (0.682) |  |  |  |  |
|  |  |  |  |  |  |  |  |  |  |  |  |  |  |  |
| Psilocybin * Priv Hlth Ins * Education |  |  |  |  |  |  |  |  |  | 1.272 |  |  |  |  |
|  |  |  |  |  |  |  |  |  |  | (0.918) |  |  |  |  |
|  |  |  |  |  |  |  |  |  |  |  |  |  |  |  |
| DMT * Education |  |  |  |  |  |  |  |  |  |  | -18.40*** |  |  |  |
|  |  |  |  |  |  |  |  |  |  |  | (1.000) |  |  |  |
|  |  |  |  |  |  |  |  |  |  |  |  |  |  |  |
| Peyote/Mescaline * Education |  |  |  |  |  |  |  |  |  |  |  |  | -0.146 |  |
|  |  |  |  |  |  |  |  |  |  |  |  |  | (0.888) |  |
|  |  |  |  |  |  |  |  |  |  |  |  |  |  |  |
| Peyote/Mescaline * Priv Hlth Ins * Education |  |  |  |  |  |  |  |  |  |  |  |  | 0.391 |  |
|  |  |  |  |  |  |  |  |  |  |  |  |  | (0.964) |  |
|  |  |  |  |  |  |  |  |  |  |  |  |  |  |  |
| LSD * Education |  |  |  |  |  |  |  |  |  |  |  |  |  | 0.830† |
|  |  |  |  |  |  |  |  |  |  |  |  |  |  | (0.492) |
|  |  |  |  |  |  |  |  |  |  |  |  |  |  |  |
| LSD * Priv Hlth Ins * Education |  |  |  |  |  |  |  |  |  |  |  |  |  | -1.204 |
|  |  |  |  |  |  |  |  |  |  |  |  |  |  | (0.754) |
|  |  |  |  |  |  |  |  |  |  |  |  |  |  |  |
| Constant | 17.18*** | 17.18*** | 17.15*** | 17.16*** | 17.16*** | 17.13*** | 17.15*** | 17.44*** | 17.41*** | 17.27*** | 17.34*** | 17.33*** | 17.30*** | 17.43*** |
|  | (0.629) | (0.626) | (0.624) | (0.624) | (0.624) | (0.626) | (0.625) | (0.661) | (0.667) | (0.657) | (0.658) | (0.658) | (0.656) | (0.652) |
| Observations | 16823 | 16823 | 16823 | 16823 | 16823 | 16823 | 16823 | 16823 | 16823 | 16823 | 16823 | 16823 | 16823 | 16823 |
| *R*2 | 0.135 | 0.136 | 0.136 | 0.136 | 0.136 | 0.136 | 0.136 | 0.135 | 0.136 | 0.136 | 0.136 | 0.136 | 0.136 | 0.137 |

Standard errors in parentheses

Source: 2008-2019 National Survey of Drug Use and Health, n=484,732

aMen serve as the references category for Women

bSingle Serves as the reference category for Marital Statuses

c2008 serves as the reference category for the year survey was taken

† *p* < .10, * *p* < .05, ** *p* < .01, *** *p* < .001

Supplemental Table 13. Weighted Multivariate Ordinary Least Square Regression Predicting Psychological Distress Among Black People with Public Health Insurance Interaction Terms

|  | Model 1 | Model 2 | Model 3 | Model 4 | Model 5 | Model 6 | Model 7 | Model 8 | Model 9 | Model 10 | Model 11 | Model 12 | Model 13 | Model 14 |
| --- | --- | --- | --- | --- | --- | --- | --- | --- | --- | --- | --- | --- | --- | --- |
| Age | -0.516*** | -0.513*** | -0.513*** | -0.513*** | -0.513*** | -0.513*** | -0.513*** | -0.519*** | -0.517*** | -0.515*** | -0.516*** | -0.516*** | -0.515*** | -0.516*** |
|  | (0.0291) | (0.0289) | (0.0290) | (0.0290) | (0.0290) | (0.0289) | (0.0290) | (0.0291) | (0.0290) | (0.0291) | (0.0292) | (0.0291) | (0.0290) | (0.0290) |
|  |  |  |  |  |  |  |  |  |  |  |  |  |  |  |
| Education | -0.264*** | -0.269*** | -0.271*** | -0.268*** | -0.268*** | -0.271*** | -0.271*** | -0.149 | -0.179† | -0.151 | -0.167† | -0.167† | -0.164† | -0.168† |
|  | (0.0695) | (0.0698) | (0.0701) | (0.0698) | (0.0698) | (0.0702) | (0.0698) | (0.0962) | (0.0965) | (0.0928) | (0.0913) | (0.0914) | (0.0928) | (0.0933) |
|  |  |  |  |  |  |  |  |  |  |  |  |  |  |  |
| Family Income | -0.308*** | -0.309*** | -0.309*** | -0.309*** | -0.309*** | -0.308*** | -0.308*** | -0.307*** | -0.309*** | -0.309*** | -0.308*** | -0.308*** | -0.307*** | -0.306*** |
|  | (0.0342) | (0.0341) | (0.0341) | (0.0341) | (0.0341) | (0.0341) | (0.0342) | (0.0342) | (0.0340) | (0.0340) | (0.0340) | (0.0340) | (0.0339) | (0.0342) |
|  |  |  |  |  |  |  |  |  |  |  |  |  |  |  |
| aWomen | 0.704*** | 0.716*** | 0.715*** | 0.719*** | 0.719*** | 0.724*** | 0.719*** | 0.689*** | 0.699*** | 0.697*** | 0.703*** | 0.702*** | 0.708*** | 0.707*** |
|  | (0.150) | (0.149) | (0.149) | (0.149) | (0.149) | (0.149) | (0.149) | (0.154) | (0.153) | (0.153) | (0.153) | (0.153) | (0.153) | (0.153) |
|  |  |  |  |  |  |  |  |  |  |  |  |  |  |  |
| bMarried | -0.121 | -0.126 | -0.122 | -0.125 | -0.125 | -0.125 | -0.122 | -0.101 | -0.108 | -0.106 | -0.111 | -0.112 | -0.111 | -0.104 |
|  | (0.176) | (0.175) | (0.176) | (0.175) | (0.175) | (0.175) | (0.176) | (0.177) | (0.177) | (0.177) | (0.177) | (0.177) | (0.177) | (0.176) |
|  |  |  |  |  |  |  |  |  |  |  |  |  |  |  |
| Widowed | -0.288 | -0.312 | -0.308 | -0.320 | -0.320 | -0.309 | -0.308 | -0.272 | -0.300 | -0.296 | -0.305 | -0.306 | -0.294 | -0.294 |
|  | (0.397) | (0.395) | (0.398) | (0.397) | (0.397) | (0.397) | (0.397) | (0.398) | (0.396) | (0.397) | (0.398) | (0.398) | (0.397) | (0.398) |
|  |  |  |  |  |  |  |  |  |  |  |  |  |  |  |
| Divorced | 0.107 | 0.121 | 0.118 | 0.118 | 0.118 | 0.112 | 0.115 | 0.130 | 0.135 | 0.133 | 0.133 | 0.133 | 0.129 | 0.132 |
|  | (0.217) | (0.216) | (0.217) | (0.217) | (0.217) | (0.217) | (0.216) | (0.217) | (0.217) | (0.217) | (0.216) | (0.216) | (0.217) | (0.215) |
|  |  |  |  |  |  |  |  |  |  |  |  |  |  |  |
| Religious Salience | -0.0924** | -0.0888** | -0.0888** | -0.0887** | -0.0887** | -0.0877** | -0.0882** | -0.0902** | -0.0872** | -0.0883** | -0.0879** | -0.0880** | -0.0870** | -0.0865** |
|  | (0.0322) | (0.0320) | (0.0319) | (0.0320) | (0.0320) | (0.0320) | (0.0321) | (0.0320) | (0.0319) | (0.0319) | (0.0320) | (0.0320) | (0.0320) | (0.0320) |
|  |  |  |  |  |  |  |  |  |  |  |  |  |  |  |
| Religious Attendance | -0.187*** | -0.180*** | -0.180*** | -0.180*** | -0.180*** | -0.181*** | -0.182*** | -0.187*** | -0.181*** | -0.181*** | -0.181*** | -0.180*** | -0.182*** | -0.182*** |
|  | (0.0416) | (0.0418) | (0.0418) | (0.0417) | (0.0417) | (0.0416) | (0.0415) | (0.0416) | (0.0419) | (0.0419) | (0.0417) | (0.0417) | (0.0417) | (0.0415) |
|  |  |  |  |  |  |  |  |  |  |  |  |  |  |  |
| Cocaine | -0.0261 | -0.103 | -0.0901 | -0.109 | -0.109 | -0.0995 | -0.0926 | -0.0151 | -0.0963 | -0.0888 | -0.109 | -0.108 | -0.0965 | -0.0858 |
|  | (0.239) | (0.238) | (0.240) | (0.238) | (0.238) | (0.240) | (0.237) | (0.240) | (0.238) | (0.240) | (0.239) | (0.239) | (0.241) | (0.238) |
|  |  |  |  |  |  |  |  |  |  |  |  |  |  |  |
| Stimulant | 0.761** | 0.697* | 0.716* | 0.696* | 0.696* | 0.707* | 0.713* | 0.746* | 0.690* | 0.725* | 0.694* | 0.692* | 0.707* | 0.698* |
|  | (0.290) | (0.293) | (0.292) | (0.294) | (0.294) | (0.292) | (0.291) | (0.289) | (0.293) | (0.292) | (0.295) | (0.295) | (0.293) | (0.290) |
|  |  |  |  |  |  |  |  |  |  |  |  |  |  |  |
| Sedative | 0.873*** | 0.923*** | 0.922*** | 0.922*** | 0.922*** | 0.931*** | 0.922*** | 0.884*** | 0.929*** | 0.925*** | 0.927*** | 0.927*** | 0.940*** | 0.931*** |
|  | (0.221) | (0.219) | (0.223) | (0.219) | (0.219) | (0.224) | (0.220) | (0.223) | (0.220) | (0.225) | (0.220) | (0.220) | (0.224) | (0.222) |
|  |  |  |  |  |  |  |  |  |  |  |  |  |  |  |
| Tranquilizer | 0.989*** | 0.960*** | 0.961*** | 0.961*** | 0.961*** | 0.952*** | 0.953*** | 0.997*** | 0.966*** | 0.967*** | 0.965*** | 0.965*** | 0.956*** | 0.961*** |
|  | (0.199) | (0.199) | (0.199) | (0.199) | (0.199) | (0.199) | (0.197) | (0.200) | (0.199) | (0.199) | (0.199) | (0.199) | (0.200) | (0.197) |
|  |  |  |  |  |  |  |  |  |  |  |  |  |  |  |
| Heroine | 0.172 | 0.351 | 0.294 | 0.368 | 0.368 | 0.327 | 0.322 | 0.190 | 0.356 | 0.303 | 0.382 | 0.375 | 0.325 | 0.359 |
|  | (0.611) | (0.605) | (0.603) | (0.606) | (0.606) | (0.603) | (0.604) | (0.616) | (0.605) | (0.608) | (0.606) | (0.607) | (0.612) | (0.606) |
|  |  |  |  |  |  |  |  |  |  |  |  |  |  |  |
| Pain Killers | 0.475* | 0.477* | 0.480** | 0.474* | 0.474* | 0.477** | 0.473* | 0.477** | 0.489** | 0.480** | 0.479** | 0.479** | 0.481** | 0.480** |
|  | (0.182) | (0.183) | (0.182) | (0.182) | (0.182) | (0.181) | (0.182) | (0.180) | (0.181) | (0.181) | (0.182) | (0.182) | (0.181) | (0.180) |
|  |  |  |  |  |  |  |  |  |  |  |  |  |  |  |
| Marijuana | -0.0265 | -0.0203 | -0.0182 | -0.0191 | -0.0191 | -0.0185 | -0.0219 | -0.0140 | -0.0133 | -0.00672 | -0.0105 | -0.0105 | -0.00958 | -0.0107 |
|  | (0.166) | (0.166) | (0.166) | (0.166) | (0.166) | (0.166) | (0.166) | (0.166) | (0.166) | (0.167) | (0.166) | (0.166) | (0.166) | (0.167) |
|  |  |  |  |  |  |  |  |  |  |  |  |  |  |  |
| PCP | -0.0859 | 0.0640 | 0.0430 | 0.0756 | 0.0756 | 0.000839 | 0.0281 | -0.102 | 0.0735 | 0.0388 | 0.0868 | 0.0820 | 0.00598 | 0.0128 |
|  | (0.588) | (0.597) | (0.601) | (0.600) | (0.600) | (0.595) | (0.576) | (0.580) | (0.596) | (0.601) | (0.600) | (0.600) | (0.599) | (0.567) |
|  |  |  |  |  |  |  |  |  |  |  |  |  |  |  |
| Inhalants | 0.579† | 0.521† | 0.526† | 0.516† | 0.516† | 0.523† | 0.540† | 0.576† | 0.518† | 0.501† | 0.510† | 0.507† | 0.515† | 0.541† |
|  | (0.304) | (0.301) | (0.303) | (0.302) | (0.302) | (0.301) | (0.299) | (0.303) | (0.297) | (0.302) | (0.300) | (0.300) | (0.299) | (0.300) |
|  |  |  |  |  |  |  |  |  |  |  |  |  |  |  |
| Tobacco | 0.795*** | 0.786*** | 0.787*** | 0.785*** | 0.785*** | 0.790*** | 0.790*** | 0.794*** | 0.787*** | 0.789*** | 0.785*** | 0.785*** | 0.791*** | 0.788*** |
|  | (0.150) | (0.150) | (0.150) | (0.150) | (0.150) | (0.151) | (0.151) | (0.150) | (0.150) | (0.150) | (0.150) | (0.150) | (0.151) | (0.150) |
|  |  |  |  |  |  |  |  |  |  |  |  |  |  |  |
| Age of 1st Alcohol Use | -0.0360 | -0.0371 | -0.0360 | -0.0379 | -0.0379 | -0.0374 | -0.0371 | -0.0331 | -0.0363 | -0.0333 | -0.0361 | -0.0362 | -0.0353 | -0.0354 |
|  | (0.0662) | (0.0664) | (0.0665) | (0.0664) | (0.0664) | (0.0666) | (0.0663) | (0.0661) | (0.0662) | (0.0662) | (0.0662) | (0.0662) | (0.0663) | (0.0663) |
|  |  |  |  |  |  |  |  |  |  |  |  |  |  |  |
| Risky Behaviors | 0.748*** | 0.742*** | 0.743*** | 0.742*** | 0.742*** | 0.741*** | 0.739*** | 0.743*** | 0.738*** | 0.737*** | 0.737*** | 0.737*** | 0.736*** | 0.736*** |
|  | (0.0967) | (0.0962) | (0.0963) | (0.0963) | (0.0963) | (0.0966) | (0.0961) | (0.0972) | (0.0967) | (0.0965) | (0.0966) | (0.0966) | (0.0966) | (0.0969) |
|  |  |  |  |  |  |  |  |  |  |  |  |  |  |  |
| c2009 | -0.0509 | -0.0558 | -0.0615 | -0.0561 | -0.0561 | -0.0628 | -0.0601 | -0.0460 | -0.0509 | -0.0545 | -0.0538 | -0.0538 | -0.0631 | -0.0559 |
|  | (0.274) | (0.280) | (0.278) | (0.280) | (0.280) | (0.281) | (0.280) | (0.275) | (0.281) | (0.280) | (0.281) | (0.281) | (0.281) | (0.281) |
|  |  |  |  |  |  |  |  |  |  |  |  |  |  |  |
| 2010 | 0.252 | 0.253 | 0.246 | 0.252 | 0.252 | 0.251 | 0.257 | 0.240 | 0.251 | 0.246 | 0.248 | 0.248 | 0.243 | 0.247 |
|  | (0.331) | (0.329) | (0.328) | (0.329) | (0.329) | (0.329) | (0.329) | (0.330) | (0.330) | (0.329) | (0.330) | (0.330) | (0.330) | (0.328) |
|  |  |  |  |  |  |  |  |  |  |  |  |  |  |  |
| 2011 | 0.259 | 0.257 | 0.262 | 0.259 | 0.259 | 0.259 | 0.265 | 0.265 | 0.263 | 0.268 | 0.263 | 0.263 | 0.262 | 0.269 |
|  | (0.385) | (0.381) | (0.383) | (0.382) | (0.382) | (0.382) | (0.383) | (0.383) | (0.381) | (0.382) | (0.381) | (0.381) | (0.382) | (0.381) |
|  |  |  |  |  |  |  |  |  |  |  |  |  |  |  |
| 2012 | 0.975** | 0.975** | 0.976** | 0.976** | 0.976** | 0.981** | 0.967** | 0.984** | 0.985** | 0.984** | 0.980** | 0.979** | 0.981** | 0.979** |
|  | (0.328) | (0.327) | (0.326) | (0.327) | (0.327) | (0.328) | (0.325) | (0.328) | (0.327) | (0.326) | (0.328) | (0.327) | (0.331) | (0.325) |
|  |  |  |  |  |  |  |  |  |  |  |  |  |  |  |
| 2013 | 0.331 | 0.319 | 0.321 | 0.318 | 0.318 | 0.313 | 0.318 | 0.351 | 0.339 | 0.341 | 0.334 | 0.335 | 0.328 | 0.339 |
|  | (0.340) | (0.339) | (0.339) | (0.339) | (0.339) | (0.339) | (0.340) | (0.341) | (0.340) | (0.341) | (0.340) | (0.340) | (0.341) | (0.341) |
|  |  |  |  |  |  |  |  |  |  |  |  |  |  |  |
| 2014 | 0.476 | 0.468 | 0.466 | 0.465 | 0.465 | 0.464 | 0.465 | 0.492 | 0.482 | 0.483 | 0.478 | 0.478 | 0.475 | 0.480 |
|  | (0.304) | (0.306) | (0.305) | (0.306) | (0.306) | (0.306) | (0.306) | (0.305) | (0.306) | (0.306) | (0.306) | (0.306) | (0.307) | (0.306) |
|  |  |  |  |  |  |  |  |  |  |  |  |  |  |  |
| 2015 | -0.256 | -0.251 | -0.258 | -0.251 | -0.251 | -0.256 | -0.252 | -0.263 | -0.265 | -0.257 | -0.258 | -0.258 | -0.264 | -0.263 |
|  | (0.309) | (0.307) | (0.307) | (0.308) | (0.308) | (0.307) | (0.308) | (0.308) | (0.306) | (0.306) | (0.307) | (0.307) | (0.307) | (0.307) |
|  |  |  |  |  |  |  |  |  |  |  |  |  |  |  |
| 2016 | -0.155 | -0.167 | -0.167 | -0.165 | -0.165 | -0.177 | -0.170 | -0.158 | -0.180 | -0.168 | -0.175 | -0.175 | -0.189 | -0.175 |
|  | (0.285) | (0.283) | (0.284) | (0.283) | (0.283) | (0.283) | (0.284) | (0.285) | (0.282) | (0.285) | (0.283) | (0.283) | (0.284) | (0.283) |
|  |  |  |  |  |  |  |  |  |  |  |  |  |  |  |
| 2017 | 0.405 | 0.387 | 0.381 | 0.388 | 0.388 | 0.378 | 0.389 | 0.406 | 0.381 | 0.396 | 0.392 | 0.392 | 0.380 | 0.387 |
|  | (0.304) | (0.302) | (0.303) | (0.302) | (0.302) | (0.302) | (0.304) | (0.303) | (0.302) | (0.303) | (0.302) | (0.302) | (0.304) | (0.303) |
|  |  |  |  |  |  |  |  |  |  |  |  |  |  |  |
| 2018 | 0.635† | 0.612† | 0.612† | 0.612† | 0.612† | 0.611† | 0.616† | 0.642† | 0.608† | 0.618† | 0.611† | 0.611† | 0.609† | 0.623† |
|  | (0.350) | (0.350) | (0.350) | (0.350) | (0.350) | (0.352) | (0.352) | (0.351) | (0.350) | (0.351) | (0.351) | (0.351) | (0.352) | (0.352) |
|  |  |  |  |  |  |  |  |  |  |  |  |  |  |  |
| 2019 | 1.059** | 1.022** | 1.016** | 1.023** | 1.023** | 1.020** | 1.023** | 1.070** | 1.022** | 1.029** | 1.026** | 1.026** | 1.021** | 1.030** |
|  | (0.320) | (0.321) | (0.321) | (0.321) | (0.321) | (0.322) | (0.322) | (0.321) | (0.322) | (0.323) | (0.323) | (0.323) | (0.324) | (0.322) |
|  |  |  |  |  |  |  |  |  |  |  |  |  |  |  |
| MDMA | 0.534† | 0.172 | 0.285 | 0.294 | 0.294 | 0.297 | 0.291 | 0.537† | -0.257 | 0.292 | 0.301 | 0.301 | 0.302 | 0.299 |
|  | (0.288) | (0.331) | (0.293) | (0.295) | (0.295) | (0.295) | (0.293) | (0.290) | (0.736) | (0.292) | (0.295) | (0.295) | (0.296) | (0.293) |
|  |  |  |  |  |  |  |  |  |  |  |  |  |  |  |
| LCPU | -0.765* |  |  |  |  |  |  | -0.342 |  |  |  |  |  |  |
|  | (0.385) |  |  |  |  |  |  | (1.104) |  |  |  |  |  |  |
|  |  |  |  |  |  |  |  |  |  |  |  |  |  |  |
| Priv Hlth Ins | -0.885*** | -0.890*** | -0.892*** | -0.890*** | -0.890*** | -0.894*** | -0.888*** | -0.906*** | -0.904*** | -0.908*** | -0.908*** | -0.908*** | -0.913*** | -0.909*** |
|  | (0.170) | (0.169) | (0.169) | (0.169) | (0.169) | (0.169) | (0.169) | (0.169) | (0.168) | (0.168) | (0.168) | (0.168) | (0.168) | (0.168) |
|  |  |  |  |  |  |  |  |  |  |  |  |  |  |  |
| Pub Hlth Ins | 0.264 | 0.300 | 0.285 | 0.326† | 0.326† | 0.291 | 0.278 | 1.077* | 1.010* | 1.009* | 0.988* | 0.987* | 0.979* | 1.032* |
|  | (0.187) | (0.185) | (0.182) | (0.179) | (0.179) | (0.181) | (0.185) | (0.453) | (0.453) | (0.444) | (0.431) | (0.432) | (0.441) | (0.446) |
|  |  |  |  |  |  |  |  |  |  |  |  |  |  |  |
| Oth Hlth Ins | -0.462 | -0.500 | -0.498 | -0.501 | -0.501 | -0.510 | -0.495 | -0.432 | -0.472 | -0.453 | -0.473 | -0.473 | -0.481 | -0.468 |
|  | (0.431) | (0.439) | (0.437) | (0.439) | (0.439) | (0.439) | (0.437) | (0.433) | (0.441) | (0.438) | (0.441) | (0.441) | (0.441) | (0.439) |
|  |  |  |  |  |  |  |  |  |  |  |  |  |  |  |
| LCPU * Pub Hlth Ins | 0.878 |  |  |  |  |  |  | -1.246 |  |  |  |  |  |  |
|  | (0.749) |  |  |  |  |  |  | (1.751) |  |  |  |  |  |  |
|  |  |  |  |  |  |  |  |  |  |  |  |  |  |  |
| Psilocybin |  | 1.609*** | 1.073* | 1.608*** | 1.608*** | 1.590*** | 1.605*** |  | 1.574*** | 2.778† | 1.613*** | 1.613*** | 1.586*** | 1.578*** |
|  |  | (0.454) | (0.533) | (0.454) | (0.454) | (0.454) | (0.457) |  | (0.453) | (1.418) | (0.457) | (0.457) | (0.458) | (0.459) |
|  |  |  |  |  |  |  |  |  |  |  |  |  |  |  |
| DMT |  | -2.276 | -1.770 | -2.399 | -2.399 | -1.709 | -1.917 |  | -2.226 | -1.959 | 43.68*** | -2.414 | -1.749 | -1.858 |
|  |  | (6.529) | (6.506) | (6.521) | (6.521) | (6.630) | (6.567) |  | (6.636) | (6.330) | (2.501) | (6.557) | (6.607) | (6.602) |
|  |  |  |  |  |  |  |  |  |  |  |  |  |  |  |
| Peyote/Mescaline |  | -1.088* | -1.161* | -1.084* | -1.084* | -1.723** | -1.163* |  | -1.092* | -1.165* | -1.066* | -1.064* | -1.209 | -1.234* |
|  |  | (0.532) | (0.527) | (0.534) | (0.534) | (0.598) | (0.530) |  | (0.532) | (0.528) | (0.534) | (0.535) | (2.032) | (0.545) |
|  |  |  |  |  |  |  |  |  |  |  |  |  |  |  |
| LSD |  | -0.373 | -0.385 | -0.371 | -0.371 | -0.369 | -0.755 |  | -0.378 | -0.398 | -0.382 | -0.379 | -0.377 | -0.614 |
|  |  | (0.418) | (0.418) | (0.419) | (0.419) | (0.415) | (0.494) |  | (0.421) | (0.421) | (0.422) | (0.422) | (0.418) | (1.313) |
|  |  |  |  |  |  |  |  |  |  |  |  |  |  |  |
| MDMA * Pub Hlth Ins |  | 0.342 |  |  |  |  |  |  | -0.526 |  |  |  |  |  |
|  |  | (0.445) |  |  |  |  |  |  | (1.199) |  |  |  |  |  |
|  |  |  |  |  |  |  |  |  |  |  |  |  |  |  |
| Psilocybin * Pub Hlth Ins |  |  | 1.658* |  |  |  |  |  |  | 0.234 |  |  |  |  |
|  |  |  | (0.715) |  |  |  |  |  |  | (2.163) |  |  |  |  |
|  |  |  |  |  |  |  |  |  |  |  |  |  |  |  |
| Peyote/Mescaline * Pub Hlth Ins |  |  |  |  |  | 1.431 |  |  |  |  |  |  | 0.836 |  |
|  |  |  |  |  |  | (1.025) |  |  |  |  |  |  | (3.260) |  |
|  |  |  |  |  |  |  |  |  |  |  |  |  |  |  |
| LSD * Pub Hlth Ins |  |  |  |  |  |  | 1.002 |  |  |  |  |  |  | -0.860 |
|  |  |  |  |  |  |  | (0.902) |  |  |  |  |  |  | (2.180) |
|  |  |  |  |  |  |  |  |  |  |  |  |  |  |  |
| LCPU * Education |  |  |  |  |  |  |  | -0.153 |  |  |  |  |  |  |
|  |  |  |  |  |  |  |  | (0.353) |  |  |  |  |  |  |
|  |  |  |  |  |  |  |  |  |  |  |  |  |  |  |
| Pub Hlth Ins * Education |  |  |  |  |  |  |  | -0.330* | -0.288† | -0.289† | -0.266† | -0.266† | -0.277† | -0.306* |
|  |  |  |  |  |  |  |  | (0.156) | (0.161) | (0.157) | (0.154) | (0.154) | (0.158) | (0.154) |
|  |  |  |  |  |  |  |  |  |  |  |  |  |  |  |
| LCPU * Pub Hlth Ins * Education |  |  |  |  |  |  |  | 0.857 |  |  |  |  |  |  |
|  |  |  |  |  |  |  |  | (0.629) |  |  |  |  |  |  |
|  |  |  |  |  |  |  |  |  |  |  |  |  |  |  |
| MDMA * Education |  |  |  |  |  |  |  |  | 0.164 |  |  |  |  |  |
|  |  |  |  |  |  |  |  |  | (0.271) |  |  |  |  |  |
|  |  |  |  |  |  |  |  |  |  |  |  |  |  |  |
| MDMA * Pub Hlth Ins * Education |  |  |  |  |  |  |  |  | 0.392 |  |  |  |  |  |
|  |  |  |  |  |  |  |  |  | (0.491) |  |  |  |  |  |
|  |  |  |  |  |  |  |  |  |  |  |  |  |  |  |
| Psilocybin * Education |  |  |  |  |  |  |  |  |  | -0.597 |  |  |  |  |
|  |  |  |  |  |  |  |  |  |  | (0.469) |  |  |  |  |
|  |  |  |  |  |  |  |  |  |  |  |  |  |  |  |
| Psilocybin * Pub Hlth Ins * Education |  |  |  |  |  |  |  |  |  | 0.513 |  |  |  |  |
|  |  |  |  |  |  |  |  |  |  | (0.744) |  |  |  |  |
|  |  |  |  |  |  |  |  |  |  |  |  |  |  |  |
| DMT * Education |  |  |  |  |  |  |  |  |  |  | -18.58*** |  |  |  |
|  |  |  |  |  |  |  |  |  |  |  | (0.995) |  |  |  |
|  |  |  |  |  |  |  |  |  |  |  |  |  |  |  |
| Peyote/Mescaline * Education |  |  |  |  |  |  |  |  |  |  |  |  | -0.184 |  |
|  |  |  |  |  |  |  |  |  |  |  |  |  | (0.679) |  |
|  |  |  |  |  |  |  |  |  |  |  |  |  |  |  |
| Peyote/Mescaline * Pub Hlth Ins * Education |  |  |  |  |  |  |  |  |  |  |  |  | 0.234 |  |
|  |  |  |  |  |  |  |  |  |  |  |  |  | (1.071) |  |
|  |  |  |  |  |  |  |  |  |  |  |  |  |  |  |
| LSD * Education |  |  |  |  |  |  |  |  |  |  |  |  |  | -0.0447 |
|  |  |  |  |  |  |  |  |  |  |  |  |  |  | (0.413) |
|  |  |  |  |  |  |  |  |  |  |  |  |  |  |  |
| LSD * Pub Hlth Ins * Education |  |  |  |  |  |  |  |  |  |  |  |  |  | 0.771 |
|  |  |  |  |  |  |  |  |  |  |  |  |  |  | (0.806) |
|  |  |  |  |  |  |  |  |  |  |  |  |  |  |  |
| Constant | 17.22*** | 17.16*** | 17.17*** | 17.16*** | 17.16*** | 17.17*** | 17.18*** | 16.93*** | 16.96*** | 16.86*** | 16.91*** | 16.91*** | 16.90*** | 16.91*** |
|  | (0.627) | (0.623) | (0.623) | (0.624) | (0.624) | (0.623) | (0.623) | (0.638) | (0.628) | (0.628) | (0.625) | (0.625) | (0.625) | (0.630) |
| Observations | 16823 | 16823 | 16823 | 16823 | 16823 | 16823 | 16823 | 16823 | 16823 | 16823 | 16823 | 16823 | 16823 | 16823 |
| *R*2 | 0.135 | 0.136 | 0.136 | 0.136 | 0.136 | 0.136 | 0.136 | 0.135 | 0.137 | 0.137 | 0.136 | 0.136 | 0.137 | 0.137 |

Standard errors in parentheses

Source: 2008-2019 National Survey of Drug Use and Health, n=484,732

aMen serve as the references category for Women

bSingle Serves as the reference category for Marital Statuses

c2008 serves as the reference category for the year survey was taken

† *p* < .10, * *p* < .05, ** *p* < .01, *** *p* < .001

Supplemental Table 14. Weighted Multivariate Ordinary Least Square Regression Predicting Psychological Distress Among Hispanics with Private Health Insurance Interaction Terms

|  | Model 1 | Model 2 | Model 3 | Model 4 | Model 5 | Model 6 | Model 7 | Model 8 | Model 9 | Model 10 | Model 11 | Model 12 | Model 13 | Model 14 |
| --- | --- | --- | --- | --- | --- | --- | --- | --- | --- | --- | --- | --- | --- | --- |
| Age | -0.383*** | -0.384*** | -0.383*** | -0.383*** | -0.384*** | -0.383*** | -0.383*** | -0.381*** | -0.384*** | -0.386*** | -0.385*** | -0.386*** | -0.383*** | -0.382*** |
|  | (0.0345) | (0.0347) | (0.0347) | (0.0347) | (0.0347) | (0.0347) | (0.0346) | (0.0349) | (0.0346) | (0.0346) | (0.0346) | (0.0347) | (0.0345) | (0.0349) |
|  |  |  |  |  |  |  |  |  |  |  |  |  |  |  |
| Education | -0.286** | -0.280** | -0.281** | -0.281** | -0.282** | -0.277** | -0.284** | -0.264* | -0.310* | -0.322** | -0.314** | -0.317** | -0.287* | -0.264* |
|  | (0.0877) | (0.0859) | (0.0864) | (0.0861) | (0.0860) | (0.0855) | (0.0873) | (0.123) | (0.119) | (0.118) | (0.114) | (0.114) | (0.116) | (0.119) |
|  |  |  |  |  |  |  |  |  |  |  |  |  |  |  |
| Family Income | -0.291*** | -0.291*** | -0.292*** | -0.291*** | -0.292*** | -0.293*** | -0.291*** | -0.293*** | -0.292*** | -0.291*** | -0.291*** | -0.292*** | -0.295*** | -0.293*** |
|  | (0.0425) | (0.0427) | (0.0427) | (0.0427) | (0.0427) | (0.0429) | (0.0426) | (0.0422) | (0.0425) | (0.0426) | (0.0426) | (0.0427) | (0.0424) | (0.0423) |
|  |  |  |  |  |  |  |  |  |  |  |  |  |  |  |
| aWomen | 0.996*** | 0.989*** | 0.989*** | 0.990*** | 0.991*** | 0.988*** | 0.989*** | 0.993*** | 0.990*** | 0.986*** | 0.989*** | 0.990*** | 0.987*** | 0.988*** |
|  | (0.144) | (0.144) | (0.144) | (0.144) | (0.144) | (0.144) | (0.144) | (0.144) | (0.143) | (0.144) | (0.144) | (0.144) | (0.144) | (0.144) |
|  |  |  |  |  |  |  |  |  |  |  |  |  |  |  |
| bMarried | -0.666*** | -0.662*** | -0.663*** | -0.663*** | -0.660*** | -0.671*** | -0.658*** | -0.668*** | -0.662*** | -0.661*** | -0.663*** | -0.658*** | -0.670*** | -0.661*** |
|  | (0.190) | (0.189) | (0.190) | (0.189) | (0.190) | (0.190) | (0.190) | (0.189) | (0.189) | (0.190) | (0.189) | (0.189) | (0.189) | (0.188) |
|  |  |  |  |  |  |  |  |  |  |  |  |  |  |  |
| Widowed | -0.131 | -0.126 | -0.122 | -0.121 | -0.118 | -0.127 | -0.119 | -0.137 | -0.130 | -0.127 | -0.124 | -0.120 | -0.119 | -0.128 |
|  | (0.541) | (0.546) | (0.545) | (0.544) | (0.544) | (0.545) | (0.542) | (0.538) | (0.546) | (0.543) | (0.544) | (0.543) | (0.545) | (0.539) |
|  |  |  |  |  |  |  |  |  |  |  |  |  |  |  |
| Divorced | -0.0489 | -0.0515 | -0.0485 | -0.0489 | -0.0448 | -0.0510 | -0.0522 | -0.0554 | -0.0501 | -0.0466 | -0.0465 | -0.0416 | -0.0501 | -0.0592 |
|  | (0.253) | (0.253) | (0.254) | (0.253) | (0.253) | (0.254) | (0.253) | (0.253) | (0.254) | (0.254) | (0.254) | (0.254) | (0.254) | (0.253) |
|  |  |  |  |  |  |  |  |  |  |  |  |  |  |  |
| Religious Salience | -0.0379 | -0.0390 | -0.0393 | -0.0393 | -0.0398 | -0.0387 | -0.0402 | -0.0387 | -0.0391 | -0.0388 | -0.0390 | -0.0398 | -0.0393 | -0.0401 |
|  | (0.0311) | (0.0310) | (0.0311) | (0.0310) | (0.0310) | (0.0310) | (0.0312) | (0.0309) | (0.0310) | (0.0309) | (0.0310) | (0.0310) | (0.0310) | (0.0312) |
|  |  |  |  |  |  |  |  |  |  |  |  |  |  |  |
| Religious Attendance | -0.115** | -0.116** | -0.116** | -0.117** | -0.117** | -0.117** | -0.116** | -0.114** | -0.117** | -0.115** | -0.117** | -0.116** | -0.118** | -0.116** |
|  | (0.0426) | (0.0424) | (0.0424) | (0.0424) | (0.0424) | (0.0422) | (0.0425) | (0.0425) | (0.0423) | (0.0424) | (0.0424) | (0.0424) | (0.0423) | (0.0424) |
|  |  |  |  |  |  |  |  |  |  |  |  |  |  |  |
| Cocaine | -0.178 | -0.124 | -0.125 | -0.125 | -0.121 | -0.130 | -0.121 | -0.179 | -0.120 | -0.125 | -0.124 | -0.119 | -0.123 | -0.121 |
|  | (0.208) | (0.213) | (0.212) | (0.214) | (0.214) | (0.213) | (0.213) | (0.207) | (0.213) | (0.213) | (0.215) | (0.214) | (0.212) | (0.211) |
|  |  |  |  |  |  |  |  |  |  |  |  |  |  |  |
| Stimulant | 1.059*** | 1.079*** | 1.080*** | 1.085*** | 1.088*** | 1.068*** | 1.091*** | 1.048*** | 1.084*** | 1.068*** | 1.082*** | 1.085*** | 1.061*** | 1.089*** |
|  | (0.229) | (0.229) | (0.228) | (0.229) | (0.229) | (0.228) | (0.230) | (0.225) | (0.229) | (0.225) | (0.228) | (0.228) | (0.224) | (0.226) |
|  |  |  |  |  |  |  |  |  |  |  |  |  |  |  |
| Sedative | 1.042** | 1.051** | 1.046** | 1.039** | 1.041** | 1.035** | 1.046** | 1.047** | 1.052** | 1.048** | 1.038** | 1.039** | 1.031** | 1.058** |
|  | (0.327) | (0.325) | (0.325) | (0.325) | (0.325) | (0.324) | (0.326) | (0.327) | (0.324) | (0.325) | (0.325) | (0.325) | (0.323) | (0.325) |
|  |  |  |  |  |  |  |  |  |  |  |  |  |  |  |
| Tranquilizer | 1.346*** | 1.357*** | 1.360*** | 1.358*** | 1.362*** | 1.376*** | 1.352*** | 1.350*** | 1.356*** | 1.365*** | 1.361*** | 1.364*** | 1.382*** | 1.351*** |
|  | (0.188) | (0.188) | (0.187) | (0.188) | (0.188) | (0.185) | (0.189) | (0.189) | (0.187) | (0.187) | (0.188) | (0.188) | (0.185) | (0.190) |
|  |  |  |  |  |  |  |  |  |  |  |  |  |  |  |
| Heroine | 0.00413 | 0.0521 | 0.0456 | 0.0306 | 0.0282 | 0.104 | -0.0147 | -0.0775 | 0.0341 | 0.0706 | 0.0254 | 0.0235 | 0.0510 | -0.107 |
|  | (0.481) | (0.489) | (0.479) | (0.488) | (0.489) | (0.482) | (0.485) | (0.478) | (0.486) | (0.475) | (0.491) | (0.489) | (0.480) | (0.483) |
|  |  |  |  |  |  |  |  |  |  |  |  |  |  |  |
| Pain Killers | 0.456** | 0.463** | 0.460** | 0.459** | 0.461** | 0.462** | 0.456** | 0.452** | 0.456** | 0.463** | 0.457** | 0.460** | 0.463** | 0.452** |
|  | (0.153) | (0.153) | (0.154) | (0.154) | (0.154) | (0.154) | (0.154) | (0.154) | (0.155) | (0.154) | (0.154) | (0.154) | (0.154) | (0.154) |
|  |  |  |  |  |  |  |  |  |  |  |  |  |  |  |
| Marijuana | 0.123 | 0.126 | 0.124 | 0.124 | 0.119 | 0.121 | 0.127 | 0.126 | 0.126 | 0.124 | 0.125 | 0.121 | 0.117 | 0.127 |
|  | (0.194) | (0.192) | (0.192) | (0.192) | (0.192) | (0.191) | (0.192) | (0.192) | (0.191) | (0.192) | (0.192) | (0.192) | (0.188) | (0.190) |
|  |  |  |  |  |  |  |  |  |  |  |  |  |  |  |
| PCP | 0.124 | 0.243 | 0.221 | 0.211 | 0.209 | 0.255 | 0.191 | 0.107 | 0.224 | 0.308 | 0.211 | 0.212 | 0.215 | 0.136 |
|  | (0.606) | (0.604) | (0.606) | (0.604) | (0.603) | (0.606) | (0.606) | (0.606) | (0.597) | (0.592) | (0.604) | (0.603) | (0.608) | (0.600) |
|  |  |  |  |  |  |  |  |  |  |  |  |  |  |  |
| Inhalants | 0.608* | 0.664** | 0.664** | 0.668** | 0.666** | 0.663** | 0.664** | 0.615* | 0.663** | 0.651* | 0.667** | 0.666** | 0.660** | 0.677** |
|  | (0.259) | (0.251) | (0.251) | (0.250) | (0.251) | (0.250) | (0.250) | (0.258) | (0.250) | (0.251) | (0.250) | (0.251) | (0.249) | (0.250) |
|  |  |  |  |  |  |  |  |  |  |  |  |  |  |  |
| Tobacco | 0.608*** | 0.607*** | 0.609*** | 0.610*** | 0.607*** | 0.603*** | 0.610*** | 0.602*** | 0.607*** | 0.609*** | 0.609*** | 0.606*** | 0.600*** | 0.605*** |
|  | (0.172) | (0.171) | (0.171) | (0.171) | (0.171) | (0.170) | (0.172) | (0.172) | (0.171) | (0.171) | (0.171) | (0.171) | (0.172) | (0.172) |
|  |  |  |  |  |  |  |  |  |  |  |  |  |  |  |
| Age of 1st Alcohol Use | -0.115 | -0.115 | -0.115 | -0.115 | -0.116 | -0.117 | -0.114 | -0.114 | -0.115 | -0.117 | -0.116 | -0.116 | -0.116 | -0.112 |
|  | (0.0755) | (0.0755) | (0.0755) | (0.0755) | (0.0756) | (0.0756) | (0.0753) | (0.0759) | (0.0759) | (0.0759) | (0.0754) | (0.0755) | (0.0755) | (0.0754) |
|  |  |  |  |  |  |  |  |  |  |  |  |  |  |  |
| Risky Behaviors | 0.903*** | 0.909*** | 0.909*** | 0.908*** | 0.910*** | 0.911*** | 0.905*** | 0.905*** | 0.908*** | 0.912*** | 0.907*** | 0.910*** | 0.912*** | 0.905*** |
|  | (0.111) | (0.111) | (0.111) | (0.111) | (0.111) | (0.111) | (0.110) | (0.110) | (0.110) | (0.110) | (0.110) | (0.110) | (0.110) | (0.110) |
|  |  |  |  |  |  |  |  |  |  |  |  |  |  |  |
| c2009 | 0.0997 | 0.0884 | 0.0876 | 0.0874 | 0.0872 | 0.102 | 0.0812 | 0.0994 | 0.0879 | 0.0903 | 0.0886 | 0.0885 | 0.106 | 0.0806 |
|  | (0.415) | (0.414) | (0.414) | (0.414) | (0.414) | (0.414) | (0.414) | (0.414) | (0.413) | (0.414) | (0.414) | (0.413) | (0.412) | (0.413) |
|  |  |  |  |  |  |  |  |  |  |  |  |  |  |  |
| 2010 | -0.0462 | -0.0526 | -0.0544 | -0.0520 | -0.0548 | -0.0536 | -0.0571 | -0.0513 | -0.0534 | -0.0494 | -0.0503 | -0.0542 | -0.0551 | -0.0671 |
|  | (0.363) | (0.361) | (0.362) | (0.361) | (0.362) | (0.360) | (0.362) | (0.366) | (0.361) | (0.362) | (0.362) | (0.362) | (0.360) | (0.365) |
|  |  |  |  |  |  |  |  |  |  |  |  |  |  |  |
| 2011 | -0.529 | -0.526 | -0.530 | -0.532 | -0.525 | -0.513 | -0.535 | -0.534 | -0.527 | -0.533 | -0.531 | -0.525 | -0.515 | -0.545 |
|  | (0.374) | (0.376) | (0.376) | (0.375) | (0.374) | (0.377) | (0.375) | (0.374) | (0.375) | (0.376) | (0.375) | (0.374) | (0.377) | (0.375) |
|  |  |  |  |  |  |  |  |  |  |  |  |  |  |  |
| 2012 | -0.120 | -0.136 | -0.136 | -0.135 | -0.134 | -0.124 | -0.143 | -0.111 | -0.138 | -0.131 | -0.133 | -0.132 | -0.119 | -0.143 |
|  | (0.394) | (0.393) | (0.393) | (0.393) | (0.393) | (0.395) | (0.393) | (0.393) | (0.394) | (0.394) | (0.393) | (0.394) | (0.392) | (0.392) |
|  |  |  |  |  |  |  |  |  |  |  |  |  |  |  |
| 2013 | 0.445 | 0.445 | 0.441 | 0.437 | 0.431 | 0.455 | 0.431 | 0.439 | 0.439 | 0.434 | 0.434 | 0.429 | 0.457 | 0.419 |
|  | (0.366) | (0.369) | (0.368) | (0.368) | (0.369) | (0.368) | (0.366) | (0.361) | (0.367) | (0.367) | (0.367) | (0.368) | (0.367) | (0.360) |
|  |  |  |  |  |  |  |  |  |  |  |  |  |  |  |
| 2014 | -0.133 | -0.134 | -0.133 | -0.134 | -0.135 | -0.118 | -0.139 | -0.141 | -0.139 | -0.131 | -0.137 | -0.137 | -0.122 | -0.148 |
|  | (0.291) | (0.291) | (0.291) | (0.291) | (0.291) | (0.291) | (0.291) | (0.291) | (0.291) | (0.291) | (0.291) | (0.291) | (0.291) | (0.291) |
|  |  |  |  |  |  |  |  |  |  |  |  |  |  |  |
| 2015 | -0.151 | -0.163 | -0.161 | -0.160 | -0.162 | -0.151 | -0.158 | -0.148 | -0.160 | -0.154 | -0.158 | -0.160 | -0.155 | -0.155 |
|  | (0.316) | (0.317) | (0.317) | (0.317) | (0.317) | (0.318) | (0.316) | (0.315) | (0.317) | (0.316) | (0.317) | (0.317) | (0.318) | (0.315) |
|  |  |  |  |  |  |  |  |  |  |  |  |  |  |  |
| 2016 | -0.150 | -0.157 | -0.157 | -0.157 | -0.159 | -0.143 | -0.165 | -0.155 | -0.155 | -0.162 | -0.157 | -0.159 | -0.144 | -0.170 |
|  | (0.317) | (0.317) | (0.317) | (0.317) | (0.317) | (0.318) | (0.315) | (0.317) | (0.317) | (0.318) | (0.317) | (0.317) | (0.317) | (0.315) |
|  |  |  |  |  |  |  |  |  |  |  |  |  |  |  |
| 2017 | -0.366 | -0.368 | -0.365 | -0.365 | -0.367 | -0.355 | -0.373 | -0.368 | -0.370 | -0.362 | -0.366 | -0.368 | -0.358 | -0.376 |
|  | (0.348) | (0.350) | (0.349) | (0.349) | (0.349) | (0.350) | (0.348) | (0.348) | (0.349) | (0.349) | (0.349) | (0.349) | (0.350) | (0.347) |
|  |  |  |  |  |  |  |  |  |  |  |  |  |  |  |
| 2018 | 0.204 | 0.194 | 0.195 | 0.195 | 0.193 | 0.202 | 0.192 | 0.202 | 0.188 | 0.201 | 0.196 | 0.194 | 0.188 | 0.191 |
|  | (0.358) | (0.358) | (0.358) | (0.358) | (0.358) | (0.359) | (0.357) | (0.358) | (0.357) | (0.359) | (0.358) | (0.358) | (0.357) | (0.357) |
|  |  |  |  |  |  |  |  |  |  |  |  |  |  |  |
| 2019 | 0.695* | 0.682* | 0.686* | 0.686* | 0.684* | 0.697* | 0.682* | 0.687* | 0.685* | 0.685* | 0.686* | 0.684* | 0.691* | 0.671† |
|  | (0.342) | (0.341) | (0.341) | (0.342) | (0.342) | (0.342) | (0.342) | (0.342) | (0.340) | (0.342) | (0.341) | (0.341) | (0.342) | (0.342) |
|  |  |  |  |  |  |  |  |  |  |  |  |  |  |  |
| MDMA | 0.0359 | 0.0444 | 0.195 | 0.191 | 0.193 | 0.203 | 0.183 | 0.0366 | 0.0260 | 0.200 | 0.191 | 0.193 | 0.187 | 0.193 |
|  | (0.240) | (0.310) | (0.239) | (0.239) | (0.239) | (0.238) | (0.241) | (0.241) | (0.836) | (0.239) | (0.238) | (0.239) | (0.237) | (0.242) |
|  |  |  |  |  |  |  |  |  |  |  |  |  |  |  |
| LCPU | 0.0751 |  |  |  |  |  |  | 1.320 |  |  |  |  |  |  |
|  | (0.415) |  |  |  |  |  |  | (0.959) |  |  |  |  |  |  |
|  |  |  |  |  |  |  |  |  |  |  |  |  |  |  |
| Priv Hlth Ins | -0.271 | -0.330† | -0.310 | -0.297 | -0.295 | -0.338† | -0.252 | -0.262 | -0.558 | -0.393 | -0.465 | -0.476 | -0.498 | -0.305 |
|  | (0.203) | (0.191) | (0.204) | (0.188) | (0.188) | (0.195) | (0.199) | (0.457) | (0.445) | (0.442) | (0.444) | (0.445) | (0.439) | (0.451) |
|  |  |  |  |  |  |  |  |  |  |  |  |  |  |  |
| Pub Hlth Ins | 0.636*** | 0.634*** | 0.631*** | 0.631*** | 0.633*** | 0.631*** | 0.626*** | 0.633*** | 0.640*** | 0.633*** | 0.636*** | 0.638*** | 0.634*** | 0.626*** |
|  | (0.176) | (0.178) | (0.177) | (0.177) | (0.178) | (0.178) | (0.177) | (0.176) | (0.179) | (0.179) | (0.178) | (0.178) | (0.178) | (0.177) |
|  |  |  |  |  |  |  |  |  |  |  |  |  |  |  |
| Oth Hlth Ins | 0.221 | 0.232 | 0.228 | 0.227 | 0.230 | 0.217 | 0.223 | 0.220 | 0.242 | 0.235 | 0.239 | 0.241 | 0.225 | 0.214 |
|  | (0.464) | (0.465) | (0.464) | (0.464) | (0.464) | (0.465) | (0.465) | (0.465) | (0.465) | (0.465) | (0.465) | (0.465) | (0.466) | (0.467) |
|  |  |  |  |  |  |  |  |  |  |  |  |  |  |  |
| LCPU * Priv Hlth Ins | -0.264 |  |  |  |  |  |  | -2.046 |  |  |  |  |  |  |
|  | (0.440) |  |  |  |  |  |  | (1.280) |  |  |  |  |  |  |
|  |  |  |  |  |  |  |  |  |  |  |  |  |  |  |
| Psilocybin |  | -0.484† | -0.556 | -0.485† | -0.478† | -0.491† | -0.464 |  | -0.482† | -0.900 | -0.485† | -0.478† | -0.461† | -0.457† |
|  |  | (0.282) | (0.412) | (0.281) | (0.281) | (0.280) | (0.280) |  | (0.282) | (0.828) | (0.281) | (0.281) | (0.275) | (0.274) |
|  |  |  |  |  |  |  |  |  |  |  |  |  |  |  |
| DMT |  | -0.117 | -0.0961 | 1.942 | -0.103 | -0.156 | -0.0711 |  | -0.0868 | -0.159 | 3.510 | -0.107 | -0.220 | -0.0724 |
|  |  | (1.966) | (1.945) | (3.216) | (1.931) | (1.971) | (1.895) |  | (1.957) | (1.959) | (3.292) | (1.934) | (1.965) | (1.931) |
|  |  |  |  |  |  |  |  |  |  |  |  |  |  |  |
| Ayahuasca |  | 2.607 | 2.661 | 2.697 | 16.12*** | 2.572 | 2.799 |  | 2.775 | 2.417 | 2.690 | 16.19*** | 2.638 | 2.729 |
|  |  | (5.745) | (5.734) | (5.721) | (0.418) | (5.736) | (5.673) |  | (5.727) | (5.927) | (5.750) | (0.431) | (5.769) | (5.720) |
|  |  |  |  |  |  |  |  |  |  |  |  |  |  |  |
| Peyote/Mescaline |  | 0.454 | 0.453 | 0.453 | 0.452 | -0.184 | 0.428 |  | 0.447 | 0.441 | 0.458 | 0.456 | 1.216 | 0.466 |
|  |  | (0.421) | (0.421) | (0.423) | (0.423) | (0.630) | (0.427) |  | (0.413) | (0.419) | (0.422) | (0.421) | (1.721) | (0.419) |
|  |  |  |  |  |  |  |  |  |  |  |  |  |  |  |
| LSD |  | -0.261 | -0.253 | -0.250 | -0.251 | -0.244 | 0.0293 |  | -0.257 | -0.257 | -0.245 | -0.248 | -0.232 | 1.658 |
|  |  | (0.362) | (0.363) | (0.365) | (0.365) | (0.361) | (0.501) |  | (0.362) | (0.361) | (0.365) | (0.364) | (0.360) | (1.174) |
|  |  |  |  |  |  |  |  |  |  |  |  |  |  |  |
| MDMA * Priv Hlth Ins |  | 0.295 |  |  |  |  |  |  | 1.180 |  |  |  |  |  |
|  |  | (0.371) |  |  |  |  |  |  | (1.430) |  |  |  |  |  |
|  |  |  |  |  |  |  |  |  |  |  |  |  |  |  |
| Psilocybin * Priv Hlth Ins |  |  | 0.131 |  |  |  |  |  |  | -0.888 |  |  |  |  |
|  |  |  | (0.498) |  |  |  |  |  |  | (1.629) |  |  |  |  |
|  |  |  |  |  |  |  |  |  |  |  |  |  |  |  |
| DMT * Priv Hlth Ins |  |  |  | -3.464 |  |  |  |  |  |  | -11.45 |  |  |  |
|  |  |  |  | (3.635) |  |  |  |  |  |  | (7.721) |  |  |  |
|  |  |  |  |  |  |  |  |  |  |  |  |  |  |  |
| Ayahuasca * Priv Hlth Ins |  |  |  |  | -20.10*** |  |  |  |  |  |  | -20.21*** |  |  |
|  |  |  |  |  | (0.961) |  |  |  |  |  |  | (1.023) |  |  |
|  |  |  |  |  |  |  |  |  |  |  |  |  |  |  |
| Peyote/Mescaline * Priv Hlth Ins |  |  |  |  |  | 1.219 |  |  |  |  |  |  | 1.166 |  |
|  |  |  |  |  |  | (0.908) |  |  |  |  |  |  | (2.974) |  |
|  |  |  |  |  |  |  |  |  |  |  |  |  |  |  |
| LSD * Priv Hlth Ins |  |  |  |  |  |  | -0.520 |  |  |  |  |  |  | -2.278 |
|  |  |  |  |  |  |  | (0.539) |  |  |  |  |  |  | (1.598) |
|  |  |  |  |  |  |  |  |  |  |  |  |  |  |  |
| LCPU * Education |  |  |  |  |  |  |  | -0.523 |  |  |  |  |  |  |
|  |  |  |  |  |  |  |  | (0.347) |  |  |  |  |  |  |
|  |  |  |  |  |  |  |  |  |  |  |  |  |  |  |
| Priv Hlth Ins * Education |  |  |  |  |  |  |  | -0.00909 | 0.0888 | 0.0398 | 0.0678 | 0.0727 | 0.0595 | 0.0131 |
|  |  |  |  |  |  |  |  | (0.151) | (0.147) | (0.146) | (0.146) | (0.147) | (0.145) | (0.149) |
|  |  |  |  |  |  |  |  |  |  |  |  |  |  |  |
| LCPU * Priv Hlth Ins * Education |  |  |  |  |  |  |  | 0.708 |  |  |  |  |  |  |
|  |  |  |  |  |  |  |  | (0.452) |  |  |  |  |  |  |
|  |  |  |  |  |  |  |  |  |  |  |  |  |  |  |
| MDMA * Education |  |  |  |  |  |  |  |  | 0.0132 |  |  |  |  |  |
|  |  |  |  |  |  |  |  |  | (0.348) |  |  |  |  |  |
|  |  |  |  |  |  |  |  |  |  |  |  |  |  |  |
| MDMA * Priv Hlth Ins * Education |  |  |  |  |  |  |  |  | -0.301 |  |  |  |  |  |
|  |  |  |  |  |  |  |  |  | (0.504) |  |  |  |  |  |
|  |  |  |  |  |  |  |  |  |  |  |  |  |  |  |
| Psilocybin * Education |  |  |  |  |  |  |  |  |  | 0.140 |  |  |  |  |
|  |  |  |  |  |  |  |  |  |  | (0.314) |  |  |  |  |
|  |  |  |  |  |  |  |  |  |  |  |  |  |  |  |
| Psilocybin * Priv Hlth Ins * Education |  |  |  |  |  |  |  |  |  | 0.306 |  |  |  |  |
|  |  |  |  |  |  |  |  |  |  | (0.540) |  |  |  |  |
|  |  |  |  |  |  |  |  |  |  |  |  |  |  |  |
| DMT * Education |  |  |  |  |  |  |  |  |  |  | -0.618 |  |  |  |
|  |  |  |  |  |  |  |  |  |  |  | (2.297) |  |  |  |
|  |  |  |  |  |  |  |  |  |  |  |  |  |  |  |
| DMT * Priv Hlth Ins * Education |  |  |  |  |  |  |  |  |  |  | 2.542 |  |  |  |
|  |  |  |  |  |  |  |  |  |  |  | (3.212) |  |  |  |
|  |  |  |  |  |  |  |  |  |  |  |  |  |  |  |
| Peyote/Mescaline * Education |  |  |  |  |  |  |  |  |  |  |  |  | -0.590 |  |
|  |  |  |  |  |  |  |  |  |  |  |  |  | (0.685) |  |
|  |  |  |  |  |  |  |  |  |  |  |  |  |  |  |
| Peyote/Mescaline * Priv Hlth Ins * Education |  |  |  |  |  |  |  |  |  |  |  |  | 0.123 |  |
|  |  |  |  |  |  |  |  |  |  |  |  |  | (1.004) |  |
|  |  |  |  |  |  |  |  |  |  |  |  |  |  |  |
| LSD * Education |  |  |  |  |  |  |  |  |  |  |  |  |  | -0.698 |
|  |  |  |  |  |  |  |  |  |  |  |  |  |  | (0.425) |
|  |  |  |  |  |  |  |  |  |  |  |  |  |  |  |
| LSD * Priv Hlth Ins * Education |  |  |  |  |  |  |  |  |  |  |  |  |  | 0.743 |
|  |  |  |  |  |  |  |  |  |  |  |  |  |  | (0.586) |
|  |  |  |  |  |  |  |  |  |  |  |  |  |  |  |
| Constant | 15.13*** | 15.16*** | 15.15*** | 15.15*** | 15.16*** | 15.14*** | 15.14*** | 15.06*** | 15.23*** | 15.27*** | 15.23*** | 15.25*** | 15.18*** | 15.09*** |
|  | (0.663) | (0.664) | (0.663) | (0.664) | (0.664) | (0.664) | (0.662) | (0.705) | (0.692) | (0.686) | (0.675) | (0.675) | (0.679) | (0.696) |
| Observations | 21113 | 21113 | 21113 | 21113 | 21113 | 21113 | 21113 | 21113 | 21113 | 21113 | 21113 | 21113 | 21113 | 21113 |
| *R*2 | 0.123 | 0.124 | 0.124 | 0.124 | 0.124 | 0.124 | 0.124 | 0.124 | 0.124 | 0.124 | 0.124 | 0.124 | 0.124 | 0.124 |

Standard errors in parentheses

Source: 2008-2019 National Survey of Drug Use and Health, n=484,732

aMen serve as the references category for Women

bSingle Serves as the reference category for Marital Statuses

c2008 serves as the reference category for the year survey was taken

† *p* < .10, * *p* < .05, ** *p* < .01, *** *p* < .001

Supplemental Table 15. Weighted Multivariate Ordinary Least Square Regression Predicting Psychological Distress Among Hispanics with Public Health Insurance Interaction Terms

|  | Model 1 | Model 2 | Model 3 | Model 4 | Model 5 | Model 6 | Model 7 | Model 8 | Model 9 | Model 10 | Model 11 | Model 12 | Model 13 | Model 14 |
| --- | --- | --- | --- | --- | --- | --- | --- | --- | --- | --- | --- | --- | --- | --- |
| Age | -0.383*** | -0.386*** | -0.385*** | -0.383*** | -0.383*** | -0.383*** | -0.384*** | -0.385*** | -0.389*** | -0.391*** | -0.388*** | -0.388*** | -0.388*** | -0.386*** |
|  | (0.0346) | (0.0347) | (0.0346) | (0.0347) | (0.0347) | (0.0347) | (0.0347) | (0.0348) | (0.0347) | (0.0345) | (0.0346) | (0.0346) | (0.0346) | (0.0349) |
|  |  |  |  |  |  |  |  |  |  |  |  |  |  |  |
| Education | -0.284** | -0.277** | -0.280** | -0.281** | -0.281** | -0.280** | -0.281** | -0.189† | -0.177† | -0.211* | -0.202* | -0.202* | -0.183† | -0.175† |
|  | (0.0869) | (0.0858) | (0.0861) | (0.0861) | (0.0861) | (0.0854) | (0.0867) | (0.101) | (0.101) | (0.0973) | (0.0993) | (0.0992) | (0.0989) | (0.0989) |
|  |  |  |  |  |  |  |  |  |  |  |  |  |  |  |
| Family Income | -0.291*** | -0.291*** | -0.291*** | -0.292*** | -0.292*** | -0.292*** | -0.292*** | -0.291*** | -0.290*** | -0.287*** | -0.290*** | -0.290*** | -0.291*** | -0.292*** |
|  | (0.0425) | (0.0426) | (0.0427) | (0.0427) | (0.0427) | (0.0428) | (0.0427) | (0.0422) | (0.0426) | (0.0425) | (0.0427) | (0.0427) | (0.0425) | (0.0423) |
|  |  |  |  |  |  |  |  |  |  |  |  |  |  |  |
| aWomen | 0.996*** | 0.990*** | 0.987*** | 0.989*** | 0.989*** | 0.986*** | 0.989*** | 0.985*** | 0.981*** | 0.978*** | 0.978*** | 0.978*** | 0.975*** | 0.980*** |
|  | (0.144) | (0.144) | (0.144) | (0.144) | (0.144) | (0.144) | (0.144) | (0.145) | (0.145) | (0.145) | (0.145) | (0.145) | (0.146) | (0.145) |
|  |  |  |  |  |  |  |  |  |  |  |  |  |  |  |
| bMarried | -0.668*** | -0.652*** | -0.661*** | -0.663*** | -0.663*** | -0.667*** | -0.662*** | -0.653*** | -0.639*** | -0.643*** | -0.647*** | -0.647*** | -0.646*** | -0.648*** |
|  | (0.190) | (0.190) | (0.190) | (0.189) | (0.189) | (0.189) | (0.189) | (0.188) | (0.188) | (0.189) | (0.188) | (0.188) | (0.188) | (0.187) |
|  |  |  |  |  |  |  |  |  |  |  |  |  |  |  |
| Widowed | -0.134 | -0.136 | -0.122 | -0.123 | -0.122 | -0.124 | -0.122 | -0.161 | -0.171 | -0.155 | -0.154 | -0.153 | -0.143 | -0.153 |
|  | (0.541) | (0.548) | (0.546) | (0.544) | (0.544) | (0.544) | (0.544) | (0.533) | (0.542) | (0.539) | (0.537) | (0.536) | (0.538) | (0.535) |
|  |  |  |  |  |  |  |  |  |  |  |  |  |  |  |
| Divorced | -0.0471 | -0.0539 | -0.0454 | -0.0500 | -0.0493 | -0.0503 | -0.0492 | -0.0310 | -0.0361 | -0.0210 | -0.0304 | -0.0301 | -0.0264 | -0.0365 |
|  | (0.253) | (0.252) | (0.254) | (0.253) | (0.253) | (0.253) | (0.253) | (0.253) | (0.252) | (0.253) | (0.253) | (0.253) | (0.252) | (0.253) |
|  |  |  |  |  |  |  |  |  |  |  |  |  |  |  |
| Religious Salience | -0.0376 | -0.0386 | -0.0387 | -0.0394 | -0.0394 | -0.0387 | -0.0393 | -0.0377 | -0.0380 | -0.0372 | -0.0389 | -0.0387 | -0.0393 | -0.0392 |
|  | (0.0311) | (0.0309) | (0.0311) | (0.0310) | (0.0310) | (0.0310) | (0.0312) | (0.0313) | (0.0310) | (0.0312) | (0.0312) | (0.0312) | (0.0312) | (0.0315) |
|  |  |  |  |  |  |  |  |  |  |  |  |  |  |  |
| Religious Attendance | -0.115** | -0.118** | -0.117** | -0.116** | -0.117** | -0.117** | -0.117** | -0.114** | -0.118** | -0.116** | -0.116** | -0.116** | -0.117** | -0.116** |
|  | (0.0426) | (0.0423) | (0.0424) | (0.0424) | (0.0424) | (0.0421) | (0.0424) | (0.0428) | (0.0424) | (0.0425) | (0.0426) | (0.0426) | (0.0423) | (0.0425) |
|  |  |  |  |  |  |  |  |  |  |  |  |  |  |  |
| Cocaine | -0.181 | -0.126 | -0.128 | -0.123 | -0.123 | -0.126 | -0.123 | -0.177 | -0.118 | -0.130 | -0.118 | -0.120 | -0.112 | -0.117 |
|  | (0.209) | (0.213) | (0.213) | (0.214) | (0.213) | (0.213) | (0.213) | (0.208) | (0.213) | (0.213) | (0.214) | (0.213) | (0.212) | (0.212) |
|  |  |  |  |  |  |  |  |  |  |  |  |  |  |  |
| Stimulant | 1.054*** | 1.077*** | 1.080*** | 1.083*** | 1.083*** | 1.074*** | 1.083*** | 1.041*** | 1.075*** | 1.067*** | 1.065*** | 1.065*** | 1.064*** | 1.076*** |
|  | (0.227) | (0.227) | (0.227) | (0.229) | (0.229) | (0.227) | (0.227) | (0.225) | (0.228) | (0.225) | (0.228) | (0.228) | (0.223) | (0.224) |
|  |  |  |  |  |  |  |  |  |  |  |  |  |  |  |
| Sedative | 1.046** | 1.066** | 1.058** | 1.047** | 1.045** | 1.049** | 1.046** | 1.056** | 1.068** | 1.065** | 1.053** | 1.053** | 1.058** | 1.063** |
|  | (0.327) | (0.324) | (0.324) | (0.325) | (0.325) | (0.324) | (0.325) | (0.326) | (0.321) | (0.323) | (0.324) | (0.323) | (0.324) | (0.323) |
|  |  |  |  |  |  |  |  |  |  |  |  |  |  |  |
| Tranquilizer | 1.349*** | 1.353*** | 1.357*** | 1.358*** | 1.358*** | 1.363*** | 1.359*** | 1.350*** | 1.354*** | 1.362*** | 1.363*** | 1.362*** | 1.364*** | 1.355*** |
|  | (0.188) | (0.187) | (0.188) | (0.188) | (0.188) | (0.187) | (0.187) | (0.188) | (0.186) | (0.187) | (0.187) | (0.187) | (0.186) | (0.188) |
|  |  |  |  |  |  |  |  |  |  |  |  |  |  |  |
| Heroine | 0.0417 | 0.101 | 0.0782 | 0.0375 | 0.0339 | 0.0693 | 0.0382 | -0.0343 | 0.0743 | 0.124 | 0.00824 | 0.0143 | 0.0528 | -0.0679 |
|  | (0.483) | (0.485) | (0.477) | (0.489) | (0.488) | (0.491) | (0.487) | (0.473) | (0.482) | (0.469) | (0.489) | (0.488) | (0.491) | (0.476) |
|  |  |  |  |  |  |  |  |  |  |  |  |  |  |  |
| Pain Killers | 0.457** | 0.460** | 0.459** | 0.460** | 0.460** | 0.463** | 0.460** | 0.457** | 0.455** | 0.466** | 0.463** | 0.463** | 0.467** | 0.458** |
|  | (0.153) | (0.154) | (0.154) | (0.154) | (0.154) | (0.154) | (0.154) | (0.154) | (0.155) | (0.155) | (0.153) | (0.153) | (0.153) | (0.154) |
|  |  |  |  |  |  |  |  |  |  |  |  |  |  |  |
| Marijuana | 0.121 | 0.120 | 0.121 | 0.124 | 0.124 | 0.121 | 0.124 | 0.122 | 0.120 | 0.122 | 0.125 | 0.125 | 0.122 | 0.122 |
|  | (0.193) | (0.190) | (0.191) | (0.192) | (0.192) | (0.191) | (0.190) | (0.191) | (0.190) | (0.191) | (0.191) | (0.191) | (0.188) | (0.189) |
|  |  |  |  |  |  |  |  |  |  |  |  |  |  |  |
| PCP | 0.144 | 0.283 | 0.237 | 0.222 | 0.216 | 0.237 | 0.219 | 0.106 | 0.272 | 0.294 | 0.224 | 0.221 | 0.181 | 0.129 |
|  | (0.610) | (0.600) | (0.606) | (0.604) | (0.603) | (0.604) | (0.609) | (0.613) | (0.593) | (0.590) | (0.608) | (0.607) | (0.597) | (0.611) |
|  |  |  |  |  |  |  |  |  |  |  |  |  |  |  |
| Inhalants | 0.606* | 0.662** | 0.663** | 0.664** | 0.664** | 0.664** | 0.663** | 0.613* | 0.660** | 0.656* | 0.662** | 0.663** | 0.665** | 0.675** |
|  | (0.258) | (0.251) | (0.250) | (0.251) | (0.251) | (0.251) | (0.249) | (0.257) | (0.251) | (0.251) | (0.251) | (0.251) | (0.251) | (0.250) |
|  |  |  |  |  |  |  |  |  |  |  |  |  |  |  |
| Tobacco | 0.607*** | 0.605*** | 0.606*** | 0.609*** | 0.609*** | 0.604*** | 0.609*** | 0.604*** | 0.607*** | 0.609*** | 0.608*** | 0.608*** | 0.601*** | 0.607*** |
|  | (0.172) | (0.170) | (0.171) | (0.171) | (0.171) | (0.170) | (0.171) | (0.171) | (0.170) | (0.170) | (0.170) | (0.170) | (0.170) | (0.171) |
|  |  |  |  |  |  |  |  |  |  |  |  |  |  |  |
| Age of 1st Alcohol Use | -0.116 | -0.119 | -0.116 | -0.115 | -0.115 | -0.118 | -0.115 | -0.115 | -0.119 | -0.120 | -0.116 | -0.116 | -0.119 | -0.114 |
|  | (0.0755) | (0.0754) | (0.0754) | (0.0756) | (0.0756) | (0.0755) | (0.0755) | (0.0760) | (0.0757) | (0.0759) | (0.0755) | (0.0755) | (0.0753) | (0.0755) |
|  |  |  |  |  |  |  |  |  |  |  |  |  |  |  |
| Risky Behaviors | 0.905*** | 0.912*** | 0.910*** | 0.908*** | 0.908*** | 0.910*** | 0.908*** | 0.902*** | 0.907*** | 0.906*** | 0.906*** | 0.906*** | 0.904*** | 0.904*** |
|  | (0.110) | (0.110) | (0.111) | (0.111) | (0.111) | (0.111) | (0.110) | (0.110) | (0.110) | (0.110) | (0.110) | (0.110) | (0.110) | (0.110) |
|  |  |  |  |  |  |  |  |  |  |  |  |  |  |  |
| c2009 | 0.103 | 0.0899 | 0.0908 | 0.0871 | 0.0872 | 0.0952 | 0.0878 | 0.110 | 0.0952 | 0.0950 | 0.0958 | 0.0957 | 0.0957 | 0.0937 |
|  | (0.414) | (0.414) | (0.413) | (0.414) | (0.414) | (0.412) | (0.413) | (0.413) | (0.413) | (0.414) | (0.414) | (0.414) | (0.412) | (0.411) |
|  |  |  |  |  |  |  |  |  |  |  |  |  |  |  |
| 2010 | -0.0469 | -0.0598 | -0.0549 | -0.0556 | -0.0548 | -0.0521 | -0.0542 | -0.0462 | -0.0535 | -0.0433 | -0.0515 | -0.0508 | -0.0454 | -0.0601 |
|  | (0.364) | (0.360) | (0.361) | (0.362) | (0.362) | (0.360) | (0.361) | (0.366) | (0.359) | (0.361) | (0.363) | (0.363) | (0.361) | (0.364) |
|  |  |  |  |  |  |  |  |  |  |  |  |  |  |  |
| 2011 | -0.526 | -0.531 | -0.531 | -0.531 | -0.532 | -0.526 | -0.531 | -0.526 | -0.541 | -0.534 | -0.529 | -0.530 | -0.531 | -0.535 |
|  | (0.374) | (0.376) | (0.376) | (0.376) | (0.376) | (0.375) | (0.375) | (0.374) | (0.377) | (0.378) | (0.376) | (0.376) | (0.377) | (0.375) |
|  |  |  |  |  |  |  |  |  |  |  |  |  |  |  |
| 2012 | -0.117 | -0.145 | -0.138 | -0.136 | -0.136 | -0.138 | -0.136 | -0.125 | -0.154 | -0.144 | -0.141 | -0.140 | -0.146 | -0.153 |
|  | (0.394) | (0.392) | (0.393) | (0.393) | (0.393) | (0.393) | (0.393) | (0.393) | (0.392) | (0.394) | (0.393) | (0.393) | (0.392) | (0.392) |
|  |  |  |  |  |  |  |  |  |  |  |  |  |  |  |
| 2013 | 0.450 | 0.438 | 0.438 | 0.439 | 0.440 | 0.436 | 0.440 | 0.435 | 0.412 | 0.420 | 0.425 | 0.426 | 0.423 | 0.418 |
|  | (0.367) | (0.367) | (0.368) | (0.368) | (0.368) | (0.367) | (0.368) | (0.365) | (0.366) | (0.369) | (0.368) | (0.368) | (0.367) | (0.365) |
|  |  |  |  |  |  |  |  |  |  |  |  |  |  |  |
| 2014 | -0.131 | -0.137 | -0.132 | -0.134 | -0.134 | -0.133 | -0.134 | -0.143 | -0.142 | -0.137 | -0.141 | -0.142 | -0.148 | -0.150 |
|  | (0.291) | (0.291) | (0.291) | (0.291) | (0.291) | (0.291) | (0.291) | (0.293) | (0.291) | (0.293) | (0.292) | (0.292) | (0.292) | (0.293) |
|  |  |  |  |  |  |  |  |  |  |  |  |  |  |  |
| 2015 | -0.153 | -0.165 | -0.165 | -0.161 | -0.161 | -0.166 | -0.161 | -0.154 | -0.160 | -0.160 | -0.159 | -0.159 | -0.173 | -0.165 |
|  | (0.317) | (0.317) | (0.317) | (0.317) | (0.317) | (0.317) | (0.317) | (0.316) | (0.316) | (0.317) | (0.316) | (0.316) | (0.317) | (0.316) |
|  |  |  |  |  |  |  |  |  |  |  |  |  |  |  |
| 2016 | -0.147 | -0.167 | -0.158 | -0.158 | -0.158 | -0.158 | -0.157 | -0.150 | -0.168 | -0.170 | -0.162 | -0.162 | -0.169 | -0.162 |
|  | (0.318) | (0.316) | (0.318) | (0.317) | (0.317) | (0.318) | (0.317) | (0.318) | (0.316) | (0.320) | (0.318) | (0.318) | (0.319) | (0.316) |
|  |  |  |  |  |  |  |  |  |  |  |  |  |  |  |
| 2017 | -0.363 | -0.373 | -0.361 | -0.366 | -0.366 | -0.368 | -0.365 | -0.368 | -0.376 | -0.365 | -0.368 | -0.368 | -0.378 | -0.374 |
|  | (0.349) | (0.350) | (0.349) | (0.349) | (0.349) | (0.350) | (0.349) | (0.350) | (0.351) | (0.349) | (0.350) | (0.350) | (0.351) | (0.349) |
|  |  |  |  |  |  |  |  |  |  |  |  |  |  |  |
| 2018 | 0.207 | 0.195 | 0.198 | 0.194 | 0.194 | 0.195 | 0.195 | 0.203 | 0.192 | 0.200 | 0.194 | 0.194 | 0.184 | 0.189 |
|  | (0.359) | (0.358) | (0.358) | (0.358) | (0.358) | (0.358) | (0.358) | (0.359) | (0.357) | (0.360) | (0.359) | (0.359) | (0.358) | (0.357) |
|  |  |  |  |  |  |  |  |  |  |  |  |  |  |  |
| 2019 | 0.697* | 0.673† | 0.683* | 0.685* | 0.685* | 0.683* | 0.686* | 0.690* | 0.678* | 0.682* | 0.682* | 0.682* | 0.676† | 0.675† |
|  | (0.342) | (0.341) | (0.342) | (0.342) | (0.342) | (0.342) | (0.342) | (0.343) | (0.342) | (0.344) | (0.343) | (0.343) | (0.344) | (0.344) |
|  |  |  |  |  |  |  |  |  |  |  |  |  |  |  |
| MDMA | 0.0396 | 0.466† | 0.199 | 0.189 | 0.190 | 0.192 | 0.190 | 0.0512 | 1.312 | 0.205 | 0.195 | 0.197 | 0.176 | 0.201 |
|  | (0.237) | (0.265) | (0.239) | (0.239) | (0.239) | (0.238) | (0.238) | (0.236) | (0.823) | (0.235) | (0.238) | (0.238) | (0.236) | (0.239) |
|  |  |  |  |  |  |  |  |  |  |  |  |  |  |  |
| LCPU | -0.0520 |  |  |  |  |  |  | 0.363 |  |  |  |  |  |  |
|  | (0.313) |  |  |  |  |  |  | (0.782) |  |  |  |  |  |  |
|  |  |  |  |  |  |  |  |  |  |  |  |  |  |  |
| Priv Hlth Ins | -0.304 | -0.313† | -0.305 | -0.300 | -0.300 | -0.299 | -0.300 | -0.346† | -0.347† | -0.344† | -0.339† | -0.339† | -0.342† | -0.345† |
|  | (0.188) | (0.187) | (0.189) | (0.188) | (0.188) | (0.188) | (0.188) | (0.192) | (0.191) | (0.191) | (0.191) | (0.191) | (0.191) | (0.192) |
|  |  |  |  |  |  |  |  |  |  |  |  |  |  |  |
| Pub Hlth Ins | 0.647*** | 0.733*** | 0.676*** | 0.632*** | 0.631*** | 0.669*** | 0.636*** | 1.246** | 1.459** | 1.382** | 1.273** | 1.273** | 1.350** | 1.249** |
|  | (0.182) | (0.188) | (0.178) | (0.177) | (0.177) | (0.175) | (0.176) | (0.463) | (0.481) | (0.461) | (0.462) | (0.462) | (0.469) | (0.459) |
|  |  |  |  |  |  |  |  |  |  |  |  |  |  |  |
| Oth Hlth Ins | 0.224 | 0.212 | 0.223 | 0.227 | 0.227 | 0.230 | 0.227 | 0.217 | 0.201 | 0.221 | 0.225 | 0.225 | 0.230 | 0.214 |
|  | (0.465) | (0.463) | (0.465) | (0.464) | (0.464) | (0.464) | (0.466) | (0.467) | (0.462) | (0.465) | (0.464) | (0.464) | (0.464) | (0.467) |
|  |  |  |  |  |  |  |  |  |  |  |  |  |  |  |
| LCPU * Pub Hlth Ins | -0.0727 |  |  |  |  |  |  | 0.226 |  |  |  |  |  |  |
|  | (0.524) |  |  |  |  |  |  | (1.644) |  |  |  |  |  |  |
|  |  |  |  |  |  |  |  |  |  |  |  |  |  |  |
| Psilocybin |  | -0.495† | -0.341 | -0.483† | -0.483† | -0.503† | -0.487† |  | -0.502† | -0.638 | -0.486† | -0.489† | -0.493† | -0.464† |
|  |  | (0.282) | (0.302) | (0.281) | (0.281) | (0.285) | (0.284) |  | (0.284) | (0.918) | (0.283) | (0.283) | (0.282) | (0.277) |
|  |  |  |  |  |  |  |  |  |  |  |  |  |  |  |
| DMT |  | -0.213 | -0.155 | 0.211 | -0.0901 | -0.160 | -0.0959 |  | -0.181 | -0.184 | 2.258 | -0.113 | -0.257 | -0.107 |
|  |  | (1.940) | (1.936) | (2.217) | (1.931) | (1.957) | (1.933) |  | (1.923) | (1.945) | (3.982) | (1.926) | (1.937) | (1.935) |
|  |  |  |  |  |  |  |  |  |  |  |  |  |  |  |
| Ayahuasca |  | 2.565 | 2.619 | 2.701 | 2.700 | 2.646 | 2.695 |  | 2.698 | 2.480 | 2.596 | 2.596 | 2.699 | 2.719 |
|  |  | (5.785) | (5.756) | (5.717) | (5.718) | (5.731) | (5.716) |  | (5.683) | (5.805) | (5.704) | (5.703) | (5.706) | (5.636) |
|  |  |  |  |  |  |  |  |  |  |  |  |  |  |  |
| Peyote/Mescaline |  | 0.470 | 0.477 | 0.445 | 0.449 | 0.801† | 0.452 |  | 0.462 | 0.446 | 0.459 | 0.461 | 2.711 | 0.500 |
|  |  | (0.417) | (0.416) | (0.422) | (0.422) | (0.455) | (0.416) |  | (0.412) | (0.413) | (0.420) | (0.418) | (1.709) | (0.401) |
|  |  |  |  |  |  |  |  |  |  |  |  |  |  |  |
| LSD |  | -0.276 | -0.264 | -0.251 | -0.250 | -0.243 | -0.234 |  | -0.264 | -0.257 | -0.249 | -0.246 | -0.242 | 0.654 |
|  |  | (0.363) | (0.363) | (0.364) | (0.365) | (0.366) | (0.377) |  | (0.362) | (0.360) | (0.363) | (0.363) | (0.366) | (0.899) |
|  |  |  |  |  |  |  |  |  |  |  |  |  |  |  |
| MDMA * Pub Hlth Ins |  | -1.011† |  |  |  |  |  |  | -2.573† |  |  |  |  |  |
|  |  | (0.572) |  |  |  |  |  |  | (1.510) |  |  |  |  |  |
|  |  |  |  |  |  |  |  |  |  |  |  |  |  |  |
| Psilocybin * Pub Hlth Ins |  |  | -0.609 |  |  |  |  |  |  | -2.008 |  |  |  |  |
|  |  |  | (0.644) |  |  |  |  |  |  | (1.878) |  |  |  |  |
|  |  |  |  |  |  |  |  |  |  |  |  |  |  |  |
| DMT * Pub Hlth Ins |  |  |  | -2.246 |  |  |  |  |  |  | 8.113 |  |  |  |
|  |  |  |  | (2.941) |  |  |  |  |  |  | (5.403) |  |  |  |
|  |  |  |  |  |  |  |  |  |  |  |  |  |  |  |
| Peyote/Mescaline * Pub Hlth Ins |  |  |  |  |  | -1.002 |  |  |  |  |  |  | -3.058 |  |
|  |  |  |  |  |  | (0.949) |  |  |  |  |  |  | (2.593) |  |
|  |  |  |  |  |  |  |  |  |  |  |  |  |  |  |
| LSD * Pub Hlth Ins |  |  |  |  |  |  | -0.0586 |  |  |  |  |  |  | 0.246 |
|  |  |  |  |  |  |  | (0.668) |  |  |  |  |  |  | (2.153) |
|  |  |  |  |  |  |  |  |  |  |  |  |  |  |  |
| LCPU * Education |  |  |  |  |  |  |  | -0.151 |  |  |  |  |  |  |
|  |  |  |  |  |  |  |  | (0.266) |  |  |  |  |  |  |
|  |  |  |  |  |  |  |  |  |  |  |  |  |  |  |
| Pub Hlth Ins * Education |  |  |  |  |  |  |  | -0.265 | -0.322† | -0.318† | -0.284 | -0.284 | -0.301† | -0.269 |
|  |  |  |  |  |  |  |  | (0.175) | (0.184) | (0.171) | (0.175) | (0.175) | (0.173) | (0.173) |
|  |  |  |  |  |  |  |  |  |  |  |  |  |  |  |
| LCPU * Pub Hlth Ins * Education |  |  |  |  |  |  |  | -0.131 |  |  |  |  |  |  |
|  |  |  |  |  |  |  |  | (0.617) |  |  |  |  |  |  |
|  |  |  |  |  |  |  |  |  |  |  |  |  |  |  |
| MDMA * Education |  |  |  |  |  |  |  |  | -0.308 |  |  |  |  |  |
|  |  |  |  |  |  |  |  |  | (0.269) |  |  |  |  |  |
|  |  |  |  |  |  |  |  |  |  |  |  |  |  |  |
| MDMA * Pub Hlth Ins * Education |  |  |  |  |  |  |  |  | 0.630 |  |  |  |  |  |
|  |  |  |  |  |  |  |  |  | (0.565) |  |  |  |  |  |
|  |  |  |  |  |  |  |  |  |  |  |  |  |  |  |
| Psilocybin * Education |  |  |  |  |  |  |  |  |  | 0.0945 |  |  |  |  |
|  |  |  |  |  |  |  |  |  |  | (0.316) |  |  |  |  |
|  |  |  |  |  |  |  |  |  |  |  |  |  |  |  |
| Psilocybin * Pub Hlth Ins * Education |  |  |  |  |  |  |  |  |  | 0.619 |  |  |  |  |
|  |  |  |  |  |  |  |  |  |  | (0.694) |  |  |  |  |
|  |  |  |  |  |  |  |  |  |  |  |  |  |  |  |
| DMT * Education |  |  |  |  |  |  |  |  |  |  | -0.670 |  |  |  |
|  |  |  |  |  |  |  |  |  |  |  | (1.152) |  |  |  |
|  |  |  |  |  |  |  |  |  |  |  |  |  |  |  |
| DMT * Pub Hlth Ins * Education |  |  |  |  |  |  |  |  |  |  | -4.666* |  |  |  |
|  |  |  |  |  |  |  |  |  |  |  | (1.991) |  |  |  |
|  |  |  |  |  |  |  |  |  |  |  |  |  |  |  |
| Peyote/Mescaline * Education |  |  |  |  |  |  |  |  |  |  |  |  | -0.692 |  |
|  |  |  |  |  |  |  |  |  |  |  |  |  | (0.585) |  |
|  |  |  |  |  |  |  |  |  |  |  |  |  |  |  |
| Peyote/Mescaline * Pub Hlth Ins * Education |  |  |  |  |  |  |  |  |  |  |  |  | 0.778 |  |
|  |  |  |  |  |  |  |  |  |  |  |  |  | (1.013) |  |
|  |  |  |  |  |  |  |  |  |  |  |  |  |  |  |
| LSD * Education |  |  |  |  |  |  |  |  |  |  |  |  |  | -0.326 |
|  |  |  |  |  |  |  |  |  |  |  |  |  |  | (0.302) |
|  |  |  |  |  |  |  |  |  |  |  |  |  |  |  |
| LSD * Pub Hlth Ins * Education |  |  |  |  |  |  |  |  |  |  |  |  |  | -0.166 |
|  |  |  |  |  |  |  |  |  |  |  |  |  |  | (0.811) |
|  |  |  |  |  |  |  |  |  |  |  |  |  |  |  |
| Constant | 15.13*** | 15.16*** | 15.15*** | 15.15*** | 15.15*** | 15.15*** | 15.15*** | 14.94*** | 14.96*** | 15.07*** | 15.02*** | 15.02*** | 14.99*** | 14.94*** |
|  | (0.665) | (0.665) | (0.664) | (0.664) | (0.664) | (0.665) | (0.664) | (0.687) | (0.691) | (0.680) | (0.677) | (0.677) | (0.682) | (0.681) |
| Observations | 21113 | 21113 | 21113 | 21113 | 21113 | 21113 | 21113 | 21113 | 21113 | 21113 | 21113 | 21113 | 21113 | 21113 |
| *R*2 | 0.123 | 0.124 | 0.124 | 0.124 | 0.124 | 0.124 | 0.124 | 0.124 | 0.125 | 0.124 | 0.124 | 0.124 | 0.125 | 0.124 |

Standard errors in parentheses

Source: 2008-2019 National Survey of Drug Use and Health, n=484,732

aMen serve as the references category for Women

bSingle Serves as the reference category for Marital Statuses

c2008 serves as the reference category for the year survey was taken

† *p* < .10, * *p* < .05, ** *p* < .01, *** *p* < .001

Supplemental Table 16. Weighted Multivariate Ordinary Least Square Regression Predicting Psychological Distress Among Asians with Private Health Insurance Interaction Terms

|  | Model 1 | Model 2 | Model 3 | Model 4 | Model 5 | Model 6 | Model 7 | Model 8 | Model 9 | Model 10 | Model 11 | Model 12 | Model 13 | Model 14 |
| --- | --- | --- | --- | --- | --- | --- | --- | --- | --- | --- | --- | --- | --- | --- |
| Age | -0.367*** | -0.368*** | -0.368*** | -0.368*** | -0.368*** | -0.368*** | -0.369*** | -0.368*** | -0.370*** | -0.367*** | -0.369*** | -0.369*** | -0.369*** | -0.371*** |
|  | (0.0663) | (0.0657) | (0.0659) | (0.0657) | (0.0657) | (0.0656) | (0.0656) | (0.0659) | (0.0657) | (0.0652) | (0.0653) | (0.0654) | (0.0652) | (0.0657) |
|  |  |  |  |  |  |  |  |  |  |  |  |  |  |  |
| Education | -0.139 | -0.149 | -0.144 | -0.148 | -0.148 | -0.149 | -0.146 | -0.179 | -0.241 | -0.206 | -0.183 | -0.182 | -0.214 | -0.144 |
|  | (0.151) | (0.148) | (0.148) | (0.149) | (0.149) | (0.148) | (0.149) | (0.257) | (0.260) | (0.245) | (0.239) | (0.239) | (0.237) | (0.251) |
|  |  |  |  |  |  |  |  |  |  |  |  |  |  |  |
| Family Income | -0.134* | -0.131* | -0.130* | -0.131* | -0.131* | -0.133* | -0.130* | -0.133* | -0.133* | -0.130* | -0.131* | -0.131* | -0.134* | -0.126* |
|  | (0.0602) | (0.0596) | (0.0597) | (0.0596) | (0.0596) | (0.0598) | (0.0597) | (0.0611) | (0.0600) | (0.0601) | (0.0598) | (0.0598) | (0.0603) | (0.0605) |
|  |  |  |  |  |  |  |  |  |  |  |  |  |  |  |
| aWomen | 0.627** | 0.651** | 0.646** | 0.650** | 0.650** | 0.653** | 0.639** | 0.626** | 0.646** | 0.653** | 0.648** | 0.648** | 0.654** | 0.634** |
|  | (0.212) | (0.211) | (0.210) | (0.210) | (0.210) | (0.209) | (0.211) | (0.210) | (0.210) | (0.208) | (0.209) | (0.209) | (0.208) | (0.209) |
|  |  |  |  |  |  |  |  |  |  |  |  |  |  |  |
| bMarried | -1.451*** | -1.428*** | -1.434*** | -1.429*** | -1.430*** | -1.423*** | -1.435*** | -1.447*** | -1.423*** | -1.434*** | -1.427*** | -1.430*** | -1.427*** | -1.432*** |
|  | (0.347) | (0.342) | (0.343) | (0.343) | (0.343) | (0.342) | (0.343) | (0.348) | (0.342) | (0.343) | (0.343) | (0.343) | (0.343) | (0.345) |
|  |  |  |  |  |  |  |  |  |  |  |  |  |  |  |
| Widowed | -0.191 | -0.198 | -0.196 | -0.196 | -0.196 | -0.202 | -0.184 | -0.154 | -0.179 | -0.170 | -0.179 | -0.183 | -0.178 | -0.157 |
|  | (0.908) | (0.911) | (0.911) | (0.912) | (0.912) | (0.913) | (0.909) | (0.907) | (0.914) | (0.914) | (0.914) | (0.915) | (0.917) | (0.908) |
|  |  |  |  |  |  |  |  |  |  |  |  |  |  |  |
| Divorced | -1.515** | -1.447** | -1.474** | -1.455** | -1.455** | -1.447** | -1.467** | -1.515** | -1.443** | -1.464** | -1.451** | -1.455** | -1.427** | -1.469** |
|  | (0.531) | (0.535) | (0.538) | (0.532) | (0.532) | (0.535) | (0.534) | (0.530) | (0.535) | (0.536) | (0.532) | (0.532) | (0.535) | (0.534) |
|  |  |  |  |  |  |  |  |  |  |  |  |  |  |  |
| Religious Salience | 0.0151 | 0.0172 | 0.0166 | 0.0172 | 0.0173 | 0.0166 | 0.0161 | 0.0159 | 0.0177 | 0.0167 | 0.0172 | 0.0171 | 0.0174 | 0.0171 |
|  | (0.0400) | (0.0406) | (0.0407) | (0.0406) | (0.0406) | (0.0407) | (0.0405) | (0.0400) | (0.0406) | (0.0407) | (0.0407) | (0.0407) | (0.0409) | (0.0405) |
|  |  |  |  |  |  |  |  |  |  |  |  |  |  |  |
| Religious Attendance | -0.0564 | -0.0590 | -0.0593 | -0.0593 | -0.0593 | -0.0579 | -0.0598 | -0.0565 | -0.0575 | -0.0588 | -0.0596 | -0.0592 | -0.0564 | -0.0607 |
|  | (0.0615) | (0.0616) | (0.0615) | (0.0615) | (0.0615) | (0.0615) | (0.0615) | (0.0615) | (0.0617) | (0.0616) | (0.0616) | (0.0616) | (0.0619) | (0.0613) |
|  |  |  |  |  |  |  |  |  |  |  |  |  |  |  |
| Cocaine | 0.630 | 0.700 | 0.668 | 0.694 | 0.693 | 0.708 | 0.654 | 0.582 | 0.704 | 0.626 | 0.681 | 0.693 | 0.701 | 0.619 |
|  | (0.513) | (0.508) | (0.515) | (0.509) | (0.509) | (0.513) | (0.516) | (0.508) | (0.508) | (0.501) | (0.509) | (0.509) | (0.514) | (0.506) |
|  |  |  |  |  |  |  |  |  |  |  |  |  |  |  |
| Stimulant | 0.180 | 0.175 | 0.184 | 0.170 | 0.170 | 0.142 | 0.181 | 0.197 | 0.159 | 0.175 | 0.180 | 0.172 | 0.141 | 0.202 |
|  | (0.364) | (0.363) | (0.362) | (0.361) | (0.361) | (0.362) | (0.360) | (0.364) | (0.361) | (0.353) | (0.361) | (0.360) | (0.363) | (0.361) |
|  |  |  |  |  |  |  |  |  |  |  |  |  |  |  |
| Sedative | 1.376* | 1.389* | 1.371* | 1.383* | 1.383* | 1.443* | 1.389* | 1.369* | 1.416* | 1.362* | 1.381* | 1.382* | 1.459* | 1.371* |
|  | (0.621) | (0.624) | (0.619) | (0.621) | (0.621) | (0.617) | (0.621) | (0.623) | (0.623) | (0.622) | (0.621) | (0.621) | (0.619) | (0.626) |
|  |  |  |  |  |  |  |  |  |  |  |  |  |  |  |
| Tranquilizer | 0.553 | 0.547 | 0.531 | 0.541 | 0.542 | 0.571 | 0.528 | 0.560 | 0.565 | 0.544 | 0.541 | 0.543 | 0.569 | 0.523 |
|  | (0.407) | (0.398) | (0.399) | (0.399) | (0.399) | (0.400) | (0.401) | (0.407) | (0.397) | (0.401) | (0.399) | (0.399) | (0.401) | (0.401) |
|  |  |  |  |  |  |  |  |  |  |  |  |  |  |  |
| Heroine | -2.611 | -2.664 | -2.582 | -2.650 | -2.648 | -2.850 | -2.525 | -2.454 | -2.828 | -2.441 | -2.648 | -2.648 | -2.761 | -2.277 |
|  | (1.877) | (1.978) | (1.918) | (1.962) | (1.962) | (1.917) | (1.876) | (1.894) | (1.967) | (1.912) | (1.961) | (1.962) | (2.044) | (1.905) |
|  |  |  |  |  |  |  |  |  |  |  |  |  |  |  |
| Pain Killers | 0.447† | 0.439† | 0.431† | 0.436† | 0.437† | 0.446† | 0.422† | 0.441† | 0.446† | 0.433† | 0.437† | 0.438† | 0.454† | 0.412† |
|  | (0.246) | (0.242) | (0.244) | (0.242) | (0.242) | (0.244) | (0.245) | (0.248) | (0.244) | (0.244) | (0.242) | (0.242) | (0.246) | (0.244) |
|  |  |  |  |  |  |  |  |  |  |  |  |  |  |  |
| Marijuana | 0.321 | 0.337 | 0.344 | 0.339 | 0.339 | 0.339 | 0.350 | 0.325 | 0.336 | 0.356 | 0.341 | 0.341 | 0.335 | 0.352 |
|  | (0.279) | (0.281) | (0.281) | (0.280) | (0.280) | (0.278) | (0.280) | (0.278) | (0.280) | (0.280) | (0.278) | (0.278) | (0.277) | (0.279) |
|  |  |  |  |  |  |  |  |  |  |  |  |  |  |  |
| PCP | 0.0389 | -0.0110 | 0.162 | 0.0437 | 0.0442 | -0.203 | 0.297 | -0.140 | -0.0561 | 0.0387 | 0.0511 | 0.0505 | -0.180 | 0.0805 |
|  | (1.181) | (1.218) | (1.256) | (1.222) | (1.222) | (1.206) | (1.173) | (1.185) | (1.225) | (1.278) | (1.220) | (1.221) | (1.208) | (1.127) |
|  |  |  |  |  |  |  |  |  |  |  |  |  |  |  |
| Inhalants | 0.715† | 0.695† | 0.722† | 0.701† | 0.698† | 0.641† | 0.690† | 0.729† | 0.695† | 0.712† | 0.702† | 0.697† | 0.624 | 0.693† |
|  | (0.373) | (0.385) | (0.388) | (0.386) | (0.385) | (0.383) | (0.386) | (0.375) | (0.381) | (0.389) | (0.386) | (0.385) | (0.384) | (0.389) |
|  |  |  |  |  |  |  |  |  |  |  |  |  |  |  |
| Tobacco | 0.375 | 0.374 | 0.375 | 0.372 | 0.372 | 0.361 | 0.375 | 0.373 | 0.377 | 0.382 | 0.372 | 0.372 | 0.361 | 0.371 |
|  | (0.278) | (0.274) | (0.275) | (0.274) | (0.274) | (0.273) | (0.275) | (0.278) | (0.274) | (0.275) | (0.274) | (0.274) | (0.274) | (0.275) |
|  |  |  |  |  |  |  |  |  |  |  |  |  |  |  |
| Age of 1st Alcohol Use | 0.00494 | 0.00772 | 0.00718 | 0.00774 | 0.00772 | 0.0102 | 0.00810 | 0.00482 | 0.00644 | 0.00865 | 0.00829 | 0.00827 | 0.0113 | 0.00797 |
|  | (0.113) | (0.113) | (0.114) | (0.113) | (0.113) | (0.113) | (0.113) | (0.112) | (0.113) | (0.113) | (0.113) | (0.113) | (0.113) | (0.112) |
|  |  |  |  |  |  |  |  |  |  |  |  |  |  |  |
| Risky Behaviors | 0.684*** | 0.689*** | 0.689*** | 0.690*** | 0.689*** | 0.690*** | 0.686*** | 0.685*** | 0.686*** | 0.687*** | 0.689*** | 0.688*** | 0.687*** | 0.688*** |
|  | (0.160) | (0.160) | (0.160) | (0.160) | (0.160) | (0.160) | (0.159) | (0.158) | (0.159) | (0.159) | (0.159) | (0.159) | (0.160) | (0.157) |
|  |  |  |  |  |  |  |  |  |  |  |  |  |  |  |
| c2009 | -0.641 | -0.665 | -0.644 | -0.658 | -0.658 | -0.694 | -0.635 | -0.636 | -0.674 | -0.662 | -0.657 | -0.657 | -0.718 | -0.627 |
|  | (0.480) | (0.476) | (0.475) | (0.472) | (0.472) | (0.465) | (0.476) | (0.477) | (0.475) | (0.471) | (0.473) | (0.473) | (0.463) | (0.475) |
|  |  |  |  |  |  |  |  |  |  |  |  |  |  |  |
| 2010 | -1.117† | -1.143† | -1.115† | -1.133† | -1.133† | -1.162† | -1.104† | -1.115† | -1.153† | -1.134† | -1.132† | -1.133† | -1.195† | -1.102† |
|  | (0.598) | (0.608) | (0.604) | (0.603) | (0.603) | (0.610) | (0.605) | (0.600) | (0.612) | (0.607) | (0.603) | (0.604) | (0.622) | (0.606) |
|  |  |  |  |  |  |  |  |  |  |  |  |  |  |  |
| 2011 | -0.176 | -0.206 | -0.192 | -0.199 | -0.201 | -0.240 | -0.177 | -0.181 | -0.221 | -0.219 | -0.203 | -0.204 | -0.273 | -0.169 |
|  | (0.567) | (0.584) | (0.581) | (0.581) | (0.581) | (0.589) | (0.583) | (0.561) | (0.581) | (0.579) | (0.579) | (0.579) | (0.596) | (0.578) |
|  |  |  |  |  |  |  |  |  |  |  |  |  |  |  |
| 2012 | -0.262 | -0.318 | -0.306 | -0.317 | -0.315 | -0.342 | -0.294 | -0.265 | -0.322 | -0.319 | -0.324 | -0.318 | -0.379 | -0.294 |
|  | (0.536) | (0.564) | (0.564) | (0.563) | (0.563) | (0.565) | (0.564) | (0.535) | (0.565) | (0.566) | (0.564) | (0.563) | (0.572) | (0.564) |
|  |  |  |  |  |  |  |  |  |  |  |  |  |  |  |
| 2013 | -0.202 | -0.238 | -0.204 | -0.226 | -0.225 | -0.268 | -0.192 | -0.204 | -0.257 | -0.221 | -0.222 | -0.226 | -0.297 | -0.182 |
|  | (0.596) | (0.613) | (0.614) | (0.611) | (0.611) | (0.628) | (0.608) | (0.600) | (0.620) | (0.618) | (0.611) | (0.611) | (0.641) | (0.609) |
|  |  |  |  |  |  |  |  |  |  |  |  |  |  |  |
| 2014 | -0.784 | -0.805 | -0.785 | -0.797 | -0.797 | -0.847† | -0.776 | -0.787 | -0.829† | -0.813 | -0.800 | -0.800 | -0.877† | -0.775 |
|  | (0.491) | (0.496) | (0.495) | (0.493) | (0.493) | (0.503) | (0.496) | (0.490) | (0.497) | (0.497) | (0.493) | (0.493) | (0.508) | (0.496) |
|  |  |  |  |  |  |  |  |  |  |  |  |  |  |  |
| 2015 | -0.142 | -0.155 | -0.126 | -0.145 | -0.145 | -0.206 | -0.126 | -0.144 | -0.172 | -0.143 | -0.148 | -0.147 | -0.241 | -0.117 |
|  | (0.553) | (0.561) | (0.559) | (0.555) | (0.555) | (0.564) | (0.558) | (0.553) | (0.562) | (0.559) | (0.554) | (0.554) | (0.574) | (0.557) |
|  |  |  |  |  |  |  |  |  |  |  |  |  |  |  |
| 2016 | -1.267* | -1.304* | -1.265* | -1.289* | -1.290* | -1.341* | -1.252* | -1.261* | -1.332* | -1.280* | -1.291* | -1.291* | -1.370* | -1.232* |
|  | (0.533) | (0.530) | (0.529) | (0.525) | (0.525) | (0.532) | (0.534) | (0.534) | (0.531) | (0.529) | (0.525) | (0.525) | (0.542) | (0.534) |
|  |  |  |  |  |  |  |  |  |  |  |  |  |  |  |
| 2017 | -0.343 | -0.360 | -0.338 | -0.351 | -0.351 | -0.400 | -0.314 | -0.350 | -0.379 | -0.361 | -0.354 | -0.354 | -0.438 | -0.304 |
|  | (0.500) | (0.500) | (0.498) | (0.497) | (0.497) | (0.507) | (0.499) | (0.505) | (0.506) | (0.506) | (0.497) | (0.497) | (0.520) | (0.502) |
|  |  |  |  |  |  |  |  |  |  |  |  |  |  |  |
| 2018 | -0.543 | -0.563 | -0.537 | -0.554 | -0.554 | -0.603 | -0.523 | -0.558 | -0.589 | -0.564 | -0.557 | -0.558 | -0.638 | -0.523 |
|  | (0.508) | (0.515) | (0.511) | (0.509) | (0.509) | (0.518) | (0.513) | (0.512) | (0.520) | (0.517) | (0.508) | (0.508) | (0.531) | (0.518) |
|  |  |  |  |  |  |  |  |  |  |  |  |  |  |  |
| 2019 | -0.0980 | -0.109 | -0.0883 | -0.100 | -0.100 | -0.141 | -0.0820 | -0.101 | -0.144 | -0.116 | -0.105 | -0.105 | -0.175 | -0.0706 |
|  | (0.548) | (0.551) | (0.549) | (0.547) | (0.547) | (0.556) | (0.549) | (0.555) | (0.555) | (0.553) | (0.545) | (0.545) | (0.563) | (0.555) |
|  |  |  |  |  |  |  |  |  |  |  |  |  |  |  |
| MDMA | -0.338 | -0.611 | -0.365 | -0.341 | -0.341 | -0.312 | -0.407 | -0.312 | -2.424 | -0.347 | -0.340 | -0.343 | -0.309 | -0.393 |
|  | (0.490) | (0.769) | (0.498) | (0.500) | (0.499) | (0.492) | (0.501) | (0.485) | (2.673) | (0.492) | (0.502) | (0.502) | (0.494) | (0.498) |
|  |  |  |  |  |  |  |  |  |  |  |  |  |  |  |
| LCPU | 1.340 |  |  |  |  |  |  | 1.238 |  |  |  |  |  |  |
|  | (0.967) |  |  |  |  |  |  | (2.962) |  |  |  |  |  |  |
|  |  |  |  |  |  |  |  |  |  |  |  |  |  |  |
| Priv Hlth Ins | -1.031*** | -1.178*** | -1.095*** | -1.144*** | -1.143*** | -1.198*** | -1.050*** | -1.353 | -1.453 | -1.459 | -1.312 | -1.314 | -1.531† | -1.179 |
|  | (0.278) | (0.291) | (0.281) | (0.282) | (0.282) | (0.285) | (0.284) | (0.978) | (1.003) | (0.932) | (0.912) | (0.912) | (0.914) | (0.973) |
|  |  |  |  |  |  |  |  |  |  |  |  |  |  |  |
| Pub Hlth Ins | -0.155 | -0.168 | -0.151 | -0.165 | -0.165 | -0.185 | -0.151 | -0.154 | -0.179 | -0.146 | -0.163 | -0.163 | -0.185 | -0.147 |
|  | (0.298) | (0.294) | (0.295) | (0.293) | (0.293) | (0.294) | (0.295) | (0.298) | (0.294) | (0.297) | (0.295) | (0.295) | (0.297) | (0.295) |
|  |  |  |  |  |  |  |  |  |  |  |  |  |  |  |
| Oth Hlth Ins | -0.203 | -0.240 | -0.235 | -0.240 | -0.239 | -0.278 | -0.232 | -0.198 | -0.258 | -0.237 | -0.236 | -0.235 | -0.276 | -0.220 |
|  | (0.493) | (0.501) | (0.503) | (0.502) | (0.502) | (0.502) | (0.502) | (0.492) | (0.501) | (0.503) | (0.500) | (0.500) | (0.502) | (0.499) |
|  |  |  |  |  |  |  |  |  |  |  |  |  |  |  |
| LCPU * Priv Hlth Ins | -1.042 |  |  |  |  |  |  | 1.008 |  |  |  |  |  |  |
|  | (1.005) |  |  |  |  |  |  | (3.948) |  |  |  |  |  |  |
|  |  |  |  |  |  |  |  |  |  |  |  |  |  |  |
| Psilocybin |  | 0.590 | 1.247 | 0.601 | 0.602 | 0.631 | 0.682 |  | 0.567 | -0.540 | 0.597 | 0.598 | 0.654 | 0.701 |
|  |  | (0.728) | (1.183) | (0.727) | (0.727) | (0.730) | (0.724) |  | (0.729) | (3.525) | (0.732) | (0.732) | (0.732) | (0.735) |
|  |  |  |  |  |  |  |  |  |  |  |  |  |  |  |
| DMT |  | 8.859** | 9.171** | 3.576*** | 8.965** | 8.851** | 9.349** |  | 8.746** | 9.361** | -9.647* | 8.961** | 8.799** | 9.508** |
|  |  | (2.731) | (2.770) | (0.874) | (2.740) | (2.727) | (2.829) |  | (2.680) | (2.849) | (4.527) | (2.738) | (2.717) | (2.938) |
|  |  |  |  |  |  |  |  |  |  |  |  |  |  |  |
| Ayahuasca |  | -3.049*** | -3.055*** | -3.056*** | -3.056*** | -3.061*** | -3.051*** |  | -3.057*** | -3.017*** | -3.056*** | -3.063*** | -3.069*** | -3.031*** |
|  |  | (0.745) | (0.746) | (0.747) | (0.747) | (0.747) | (0.744) |  | (0.748) | (0.745) | (0.750) | (0.750) | (0.752) | (0.742) |
|  |  |  |  |  |  |  |  |  |  |  |  |  |  |  |
| Peyote/Mescaline |  | -0.0352 | -0.101 | -0.0502 | -0.0499 | -1.913† | -0.118 |  | 0.0696 | -0.0368 | -0.0471 | -0.0495 | -4.395† | -0.137 |
|  |  | (1.019) | (1.053) | (1.029) | (1.029) | (1.036) | (1.077) |  | (1.008) | (1.019) | (1.030) | (1.031) | (2.558) | (1.061) |
|  |  |  |  |  |  |  |  |  |  |  |  |  |  |  |
| LSD |  | 0.0190 | -0.0150 | -0.00658 | -0.00677 | 0.0294 | 1.082 |  | 0.0331 | -0.0538 | -0.00161 | -0.00637 | 0.0619 | 2.216 |
|  |  | (0.747) | (0.750) | (0.746) | (0.746) | (0.742) | (1.127) |  | (0.746) | (0.755) | (0.747) | (0.747) | (0.749) | (3.438) |
|  |  |  |  |  |  |  |  |  |  |  |  |  |  |  |
| MDMA * Priv Hlth Ins |  | 0.377 |  |  |  |  |  |  | 0.807 |  |  |  |  |  |
|  |  | (0.908) |  |  |  |  |  |  | (3.781) |  |  |  |  |  |
|  |  |  |  |  |  |  |  |  |  |  |  |  |  |  |
| Psilocybin * Priv Hlth Ins |  |  | -0.846 |  |  |  |  |  |  | 4.047 |  |  |  |  |
|  |  |  | (1.168) |  |  |  |  |  |  | (5.128) |  |  |  |  |
|  |  |  |  |  |  |  |  |  |  |  |  |  |  |  |
| DMT * Priv Hlth Ins |  |  |  | 5.651* |  |  |  |  |  |  | -6.434* |  |  |  |
|  |  |  |  | (2.773) |  |  |  |  |  |  | (2.537) |  |  |  |
|  |  |  |  |  |  |  |  |  |  |  |  |  |  |  |
| Peyote/Mescaline * Priv Hlth Ins |  |  |  |  |  | 2.736* |  |  |  |  |  |  | 7.589† |  |
|  |  |  |  |  |  | (1.375) |  |  |  |  |  |  | (4.435) |  |
|  |  |  |  |  |  |  |  |  |  |  |  |  |  |  |
| LSD * Priv Hlth Ins |  |  |  |  |  |  | -1.580 |  |  |  |  |  |  | -0.633 |
|  |  |  |  |  |  |  | (1.221) |  |  |  |  |  |  | (4.740) |
|  |  |  |  |  |  |  |  |  |  |  |  |  |  |  |
| LCPU * Education |  |  |  |  |  |  |  | 0.0346 |  |  |  |  |  |  |
|  |  |  |  |  |  |  |  | (0.956) |  |  |  |  |  |  |
|  |  |  |  |  |  |  |  |  |  |  |  |  |  |  |
| Priv Hlth Ins * Education |  |  |  |  |  |  |  | 0.0951 | 0.0879 | 0.110 | 0.0522 | 0.0528 | 0.103 | 0.0358 |
|  |  |  |  |  |  |  |  | (0.282) | (0.285) | (0.266) | (0.259) | (0.259) | (0.261) | (0.278) |
|  |  |  |  |  |  |  |  |  |  |  |  |  |  |  |
| LCPU * Priv Hlth Ins * Education |  |  |  |  |  |  |  | -0.583 |  |  |  |  |  |  |
|  |  |  |  |  |  |  |  | (1.180) |  |  |  |  |  |  |
|  |  |  |  |  |  |  |  |  |  |  |  |  |  |  |
| MDMA * Education |  |  |  |  |  |  |  |  | 0.615 |  |  |  |  |  |
|  |  |  |  |  |  |  |  |  | (0.935) |  |  |  |  |  |
|  |  |  |  |  |  |  |  |  |  |  |  |  |  |  |
| MDMA * Priv Hlth Ins * Education |  |  |  |  |  |  |  |  | -0.225 |  |  |  |  |  |
|  |  |  |  |  |  |  |  |  | (1.252) |  |  |  |  |  |
|  |  |  |  |  |  |  |  |  |  |  |  |  |  |  |
| Psilocybin * Education |  |  |  |  |  |  |  |  |  | 0.624 |  |  |  |  |
|  |  |  |  |  |  |  |  |  |  | (1.140) |  |  |  |  |
|  |  |  |  |  |  |  |  |  |  |  |  |  |  |  |
| Psilocybin * Priv Hlth Ins * Education |  |  |  |  |  |  |  |  |  | -1.473 |  |  |  |  |
|  |  |  |  |  |  |  |  |  |  | (1.541) |  |  |  |  |
|  |  |  |  |  |  |  |  |  |  |  |  |  |  |  |
| DMT * Education |  |  |  |  |  |  |  |  |  |  | 6.598** |  |  |  |
|  |  |  |  |  |  |  |  |  |  |  | (2.203) |  |  |  |
|  |  |  |  |  |  |  |  |  |  |  |  |  |  |  |
| Peyote/Mescaline * Education |  |  |  |  |  |  |  |  |  |  |  |  | 0.893 |  |
|  |  |  |  |  |  |  |  |  |  |  |  |  | (0.748) |  |
|  |  |  |  |  |  |  |  |  |  |  |  |  |  |  |
| Peyote/Mescaline * Priv Hlth Ins * Education |  |  |  |  |  |  |  |  |  |  |  |  | -1.622 |  |
|  |  |  |  |  |  |  |  |  |  |  |  |  | (1.459) |  |
|  |  |  |  |  |  |  |  |  |  |  |  |  |  |  |
| LSD * Education |  |  |  |  |  |  |  |  |  |  |  |  |  | -0.393 |
|  |  |  |  |  |  |  |  |  |  |  |  |  |  | (1.165) |
|  |  |  |  |  |  |  |  |  |  |  |  |  |  |  |
| LSD * Priv Hlth Ins * Education |  |  |  |  |  |  |  |  |  |  |  |  |  | -0.203 |
|  |  |  |  |  |  |  |  |  |  |  |  |  |  | (1.410) |
|  |  |  |  |  |  |  |  |  |  |  |  |  |  |  |
| Constant | 15.46*** | 15.59*** | 15.49*** | 15.55*** | 15.55*** | 15.63*** | 15.46*** | 15.59*** | 15.93*** | 15.67*** | 15.67*** | 15.66*** | 15.87*** | 15.46*** |
|  | (0.953) | (0.977) | (0.961) | (0.951) | (0.952) | (0.948) | (0.956) | (1.096) | (1.125) | (1.111) | (1.087) | (1.087) | (1.089) | (1.097) |
| Observations | 5886 | 5886 | 5886 | 5886 | 5886 | 5886 | 5886 | 5886 | 5886 | 5886 | 5886 | 5886 | 5886 | 5886 |
| *R*2 | 0.152 | 0.153 | 0.153 | 0.153 | 0.153 | 0.153 | 0.153 | 0.152 | 0.153 | 0.153 | 0.153 | 0.153 | 0.154 | 0.154 |

Standard errors in parentheses

Source: 2008-2019 National Survey of Drug Use and Health, n=484,732

aMen serve as the references category for Women

bSingle Serves as the reference category for Marital Statuses

c2008 serves as the reference category for the year survey was taken

† *p* < .10, * *p* < .05, ** *p* < .01, *** *p* < .001

Supplemental Table 17. Weighted Multivariate Ordinary Least Square Regression Predicting Psychological Distress Among Asians with Public Health Insurance Interaction Terms

|  | Model 1 | Model 2 | Model 3 | Model 4 | Model 5 | Model 6 | Model 7 | Model 8 | Model 9 | Model 10 | Model 11 | Model 12 | Model 13 | Model 14 |
| --- | --- | --- | --- | --- | --- | --- | --- | --- | --- | --- | --- | --- | --- | --- |
| Age | -0.368*** | -0.370*** | -0.370*** | -0.368*** | -0.368*** | -0.368*** | -0.369*** | -0.370*** | -0.372*** | -0.370*** | -0.369*** | -0.369*** | -0.368*** | -0.373*** |
|  | (0.0657) | (0.0659) | (0.0656) | (0.0657) | (0.0657) | (0.0658) | (0.0656) | (0.0649) | (0.0657) | (0.0652) | (0.0653) | (0.0653) | (0.0653) | (0.0649) |
|  |  |  |  |  |  |  |  |  |  |  |  |  |  |  |
| Education | -0.141 | -0.146 | -0.145 | -0.148 | -0.148 | -0.148 | -0.147 | -0.0837 | -0.153 | -0.113 | -0.130 | -0.128 | -0.137 | -0.0892 |
|  | (0.151) | (0.148) | (0.148) | (0.149) | (0.149) | (0.149) | (0.148) | (0.153) | (0.146) | (0.150) | (0.144) | (0.144) | (0.144) | (0.147) |
|  |  |  |  |  |  |  |  |  |  |  |  |  |  |  |
| Family Income | -0.135* | -0.130* | -0.132* | -0.131* | -0.131* | -0.130* | -0.131* | -0.131* | -0.133* | -0.130* | -0.131* | -0.131* | -0.131* | -0.125* |
|  | (0.0600) | (0.0597) | (0.0595) | (0.0596) | (0.0596) | (0.0596) | (0.0596) | (0.0607) | (0.0598) | (0.0595) | (0.0596) | (0.0596) | (0.0598) | (0.0599) |
|  |  |  |  |  |  |  |  |  |  |  |  |  |  |  |
| aWomen | 0.633** | 0.653** | 0.656** | 0.650** | 0.650** | 0.651** | 0.651** | 0.624** | 0.647** | 0.655** | 0.647** | 0.647** | 0.648** | 0.637** |
|  | (0.211) | (0.210) | (0.209) | (0.210) | (0.210) | (0.210) | (0.210) | (0.211) | (0.210) | (0.208) | (0.209) | (0.209) | (0.209) | (0.210) |
|  |  |  |  |  |  |  |  |  |  |  |  |  |  |  |
| bMarried | -1.441*** | -1.426*** | -1.424*** | -1.430*** | -1.430*** | -1.429*** | -1.427*** | -1.437*** | -1.421*** | -1.421*** | -1.427*** | -1.430*** | -1.429*** | -1.424*** |
|  | (0.345) | (0.342) | (0.343) | (0.343) | (0.343) | (0.343) | (0.341) | (0.346) | (0.341) | (0.344) | (0.343) | (0.343) | (0.343) | (0.342) |
|  |  |  |  |  |  |  |  |  |  |  |  |  |  |  |
| Widowed | -0.198 | -0.203 | -0.199 | -0.196 | -0.196 | -0.191 | -0.197 | -0.186 | -0.219 | -0.195 | -0.203 | -0.206 | -0.203 | -0.174 |
|  | (0.909) | (0.913) | (0.912) | (0.912) | (0.912) | (0.912) | (0.911) | (0.916) | (0.922) | (0.920) | (0.920) | (0.920) | (0.921) | (0.917) |
|  |  |  |  |  |  |  |  |  |  |  |  |  |  |  |
| Divorced | -1.496** | -1.453** | -1.457** | -1.455** | -1.455** | -1.448** | -1.451** | -1.505** | -1.446** | -1.439** | -1.449** | -1.452** | -1.441** | -1.462** |
|  | (0.529) | (0.533) | (0.532) | (0.532) | (0.532) | (0.531) | (0.532) | (0.525) | (0.532) | (0.530) | (0.530) | (0.530) | (0.532) | (0.526) |
|  |  |  |  |  |  |  |  |  |  |  |  |  |  |  |
| Religious Salience | 0.0159 | 0.0177 | 0.0175 | 0.0173 | 0.0173 | 0.0170 | 0.0170 | 0.0169 | 0.0187 | 0.0174 | 0.0177 | 0.0177 | 0.0176 | 0.0188 |
|  | (0.0400) | (0.0406) | (0.0406) | (0.0406) | (0.0406) | (0.0406) | (0.0407) | (0.0396) | (0.0404) | (0.0405) | (0.0404) | (0.0404) | (0.0405) | (0.0402) |
|  |  |  |  |  |  |  |  |  |  |  |  |  |  |  |
| Religious Attendance | -0.0562 | -0.0598 | -0.0598 | -0.0593 | -0.0593 | -0.0585 | -0.0595 | -0.0577 | -0.0581 | -0.0594 | -0.0596 | -0.0592 | -0.0579 | -0.0620 |
|  | (0.0614) | (0.0614) | (0.0615) | (0.0615) | (0.0615) | (0.0616) | (0.0615) | (0.0614) | (0.0615) | (0.0615) | (0.0616) | (0.0616) | (0.0617) | (0.0613) |
|  |  |  |  |  |  |  |  |  |  |  |  |  |  |  |
| Cocaine | 0.687 | 0.698 | 0.714 | 0.693 | 0.693 | 0.693 | 0.712 | 0.629 | 0.703 | 0.687 | 0.686 | 0.694 | 0.702 | 0.660 |
|  | (0.511) | (0.512) | (0.523) | (0.509) | (0.509) | (0.509) | (0.522) | (0.515) | (0.517) | (0.520) | (0.509) | (0.509) | (0.513) | (0.515) |
|  |  |  |  |  |  |  |  |  |  |  |  |  |  |  |
| Stimulant | 0.163 | 0.173 | 0.160 | 0.170 | 0.170 | 0.161 | 0.160 | 0.193 | 0.183 | 0.166 | 0.175 | 0.170 | 0.156 | 0.186 |
|  | (0.365) | (0.361) | (0.366) | (0.361) | (0.361) | (0.361) | (0.361) | (0.370) | (0.369) | (0.378) | (0.361) | (0.360) | (0.363) | (0.363) |
|  |  |  |  |  |  |  |  |  |  |  |  |  |  |  |
| Sedative | 1.380* | 1.386* | 1.380* | 1.383* | 1.383* | 1.385* | 1.379* | 1.360* | 1.402* | 1.385* | 1.386* | 1.385* | 1.403* | 1.365* |
|  | (0.624) | (0.622) | (0.623) | (0.621) | (0.621) | (0.619) | (0.622) | (0.615) | (0.620) | (0.617) | (0.621) | (0.621) | (0.617) | (0.615) |
|  |  |  |  |  |  |  |  |  |  |  |  |  |  |  |
| Tranquilizer | 0.569 | 0.545 | 0.552 | 0.542 | 0.542 | 0.545 | 0.551 | 0.571 | 0.556 | 0.550 | 0.540 | 0.542 | 0.544 | 0.540 |
|  | (0.407) | (0.398) | (0.399) | (0.399) | (0.399) | (0.399) | (0.400) | (0.406) | (0.396) | (0.400) | (0.399) | (0.399) | (0.398) | (0.399) |
|  |  |  |  |  |  |  |  |  |  |  |  |  |  |  |
| Heroine | -2.642 | -2.542 | -2.477 | -2.648 | -2.648 | -2.666 | -2.540 | -2.344 | -2.826 | -1.913 | -2.641 | -2.639 | -2.750 | -2.015 |
|  | (1.804) | (1.843) | (1.690) | (1.962) | (1.962) | (1.964) | (1.770) | (1.689) | (1.823) | (1.487) | (1.943) | (1.943) | (1.996) | (1.676) |
|  |  |  |  |  |  |  |  |  |  |  |  |  |  |  |
| Pain Killers | 0.456† | 0.436† | 0.435† | 0.437† | 0.437† | 0.435† | 0.437† | 0.439† | 0.445† | 0.419† | 0.437† | 0.439† | 0.440† | 0.415† |
|  | (0.244) | (0.241) | (0.241) | (0.242) | (0.242) | (0.242) | (0.242) | (0.246) | (0.242) | (0.240) | (0.242) | (0.242) | (0.243) | (0.242) |
|  |  |  |  |  |  |  |  |  |  |  |  |  |  |  |
| Marijuana | 0.315 | 0.338 | 0.335 | 0.339 | 0.339 | 0.340 | 0.338 | 0.319 | 0.333 | 0.342 | 0.339 | 0.339 | 0.336 | 0.342 |
|  | (0.279) | (0.281) | (0.281) | (0.280) | (0.280) | (0.280) | (0.280) | (0.280) | (0.282) | (0.281) | (0.280) | (0.280) | (0.279) | (0.281) |
|  |  |  |  |  |  |  |  |  |  |  |  |  |  |  |
| PCP | -0.110 | -0.0282 | -0.0295 | 0.0442 | 0.0442 | 0.0453 | 0.0895 | -0.285 | -0.0878 | 0.00559 | 0.0250 | 0.0245 | -0.0155 | -0.205 |
|  | (1.180) | (1.228) | (1.234) | (1.222) | (1.222) | (1.212) | (1.189) | (1.042) | (1.232) | (1.248) | (1.224) | (1.225) | (1.210) | (1.093) |
|  |  |  |  |  |  |  |  |  |  |  |  |  |  |  |
| Inhalants | 0.699† | 0.704† | 0.709† | 0.698† | 0.698† | 0.705† | 0.704† | 0.700† | 0.702† | 0.699† | 0.703† | 0.697† | 0.699† | 0.702† |
|  | (0.372) | (0.389) | (0.387) | (0.385) | (0.385) | (0.386) | (0.388) | (0.377) | (0.385) | (0.388) | (0.386) | (0.386) | (0.388) | (0.394) |
|  |  |  |  |  |  |  |  |  |  |  |  |  |  |  |
| Tobacco | 0.367 | 0.373 | 0.373 | 0.372 | 0.372 | 0.377 | 0.374 | 0.363 | 0.375 | 0.375 | 0.371 | 0.371 | 0.377 | 0.368 |
|  | (0.277) | (0.274) | (0.274) | (0.274) | (0.274) | (0.275) | (0.274) | (0.276) | (0.274) | (0.274) | (0.274) | (0.274) | (0.275) | (0.274) |
|  |  |  |  |  |  |  |  |  |  |  |  |  |  |  |
| Age of 1st Alcohol Use | 0.00581 | 0.00626 | 0.00572 | 0.00772 | 0.00772 | 0.00824 | 0.00747 | 0.00577 | 0.00541 | 0.00555 | 0.00807 | 0.00804 | 0.00806 | 0.00718 |
|  | (0.113) | (0.114) | (0.114) | (0.113) | (0.113) | (0.114) | (0.114) | (0.113) | (0.113) | (0.114) | (0.113) | (0.113) | (0.113) | (0.113) |
|  |  |  |  |  |  |  |  |  |  |  |  |  |  |  |
| Risky Behaviors | 0.685*** | 0.689*** | 0.689*** | 0.689*** | 0.689*** | 0.690*** | 0.689*** | 0.687*** | 0.688*** | 0.688*** | 0.689*** | 0.688*** | 0.688*** | 0.692*** |
|  | (0.161) | (0.160) | (0.160) | (0.160) | (0.160) | (0.160) | (0.161) | (0.160) | (0.160) | (0.160) | (0.160) | (0.160) | (0.161) | (0.160) |
|  |  |  |  |  |  |  |  |  |  |  |  |  |  |  |
| c2009 | -0.656 | -0.651 | -0.647 | -0.658 | -0.658 | -0.667 | -0.648 | -0.630 | -0.665 | -0.640 | -0.659 | -0.659 | -0.677 | -0.624 |
|  | (0.473) | (0.473) | (0.474) | (0.472) | (0.472) | (0.470) | (0.473) | (0.479) | (0.476) | (0.475) | (0.473) | (0.473) | (0.468) | (0.477) |
|  |  |  |  |  |  |  |  |  |  |  |  |  |  |  |
| 2010 | -1.133† | -1.128† | -1.124† | -1.133† | -1.133† | -1.142† | -1.127† | -1.110† | -1.140† | -1.111† | -1.130† | -1.130† | -1.150† | -1.108† |
|  | (0.594) | (0.602) | (0.602) | (0.603) | (0.603) | (0.604) | (0.602) | (0.598) | (0.605) | (0.603) | (0.605) | (0.605) | (0.614) | (0.603) |
|  |  |  |  |  |  |  |  |  |  |  |  |  |  |  |
| 2011 | -0.185 | -0.196 | -0.187 | -0.201 | -0.201 | -0.214 | -0.193 | -0.157 | -0.206 | -0.185 | -0.197 | -0.200 | -0.223 | -0.162 |
|  | (0.562) | (0.579) | (0.580) | (0.581) | (0.581) | (0.582) | (0.578) | (0.564) | (0.580) | (0.581) | (0.581) | (0.581) | (0.588) | (0.577) |
|  |  |  |  |  |  |  |  |  |  |  |  |  |  |  |
| 2012 | -0.268 | -0.313 | -0.309 | -0.315 | -0.315 | -0.325 | -0.306 | -0.251 | -0.315 | -0.302 | -0.319 | -0.313 | -0.334 | -0.291 |
|  | (0.533) | (0.563) | (0.563) | (0.563) | (0.563) | (0.562) | (0.561) | (0.538) | (0.566) | (0.565) | (0.566) | (0.564) | (0.567) | (0.565) |
|  |  |  |  |  |  |  |  |  |  |  |  |  |  |  |
| 2013 | -0.222 | -0.225 | -0.222 | -0.225 | -0.225 | -0.233 | -0.219 | -0.190 | -0.245 | -0.206 | -0.218 | -0.221 | -0.237 | -0.181 |
|  | (0.594) | (0.611) | (0.610) | (0.611) | (0.611) | (0.612) | (0.608) | (0.590) | (0.616) | (0.607) | (0.611) | (0.612) | (0.619) | (0.599) |
|  |  |  |  |  |  |  |  |  |  |  |  |  |  |  |
| 2014 | -0.798 | -0.794 | -0.786 | -0.797 | -0.797 | -0.805 | -0.791 | -0.773 | -0.815 | -0.763 | -0.796 | -0.795 | -0.811 | -0.775 |
|  | (0.485) | (0.491) | (0.490) | (0.493) | (0.493) | (0.493) | (0.491) | (0.490) | (0.494) | (0.491) | (0.494) | (0.494) | (0.498) | (0.495) |
|  |  |  |  |  |  |  |  |  |  |  |  |  |  |  |
| 2015 | -0.163 | -0.140 | -0.139 | -0.145 | -0.145 | -0.153 | -0.137 | -0.134 | -0.153 | -0.122 | -0.143 | -0.143 | -0.161 | -0.107 |
|  | (0.548) | (0.553) | (0.556) | (0.555) | (0.555) | (0.556) | (0.553) | (0.550) | (0.558) | (0.558) | (0.557) | (0.557) | (0.562) | (0.555) |
|  |  |  |  |  |  |  |  |  |  |  |  |  |  |  |
| 2016 | -1.294* | -1.284* | -1.273* | -1.290* | -1.290* | -1.300* | -1.281* | -1.251* | -1.320* | -1.233* | -1.287* | -1.287* | -1.310* | -1.224* |
|  | (0.524) | (0.523) | (0.525) | (0.525) | (0.525) | (0.525) | (0.524) | (0.530) | (0.528) | (0.530) | (0.527) | (0.527) | (0.531) | (0.530) |
|  |  |  |  |  |  |  |  |  |  |  |  |  |  |  |
| 2017 | -0.364 | -0.350 | -0.347 | -0.351 | -0.351 | -0.357 | -0.350 | -0.336 | -0.356 | -0.328 | -0.345 | -0.345 | -0.357 | -0.313 |
|  | (0.498) | (0.497) | (0.498) | (0.497) | (0.497) | (0.498) | (0.497) | (0.501) | (0.503) | (0.501) | (0.499) | (0.499) | (0.502) | (0.502) |
|  |  |  |  |  |  |  |  |  |  |  |  |  |  |  |
| 2018 | -0.564 | -0.552 | -0.544 | -0.554 | -0.554 | -0.562 | -0.544 | -0.541 | -0.573 | -0.526 | -0.553 | -0.554 | -0.574 | -0.521 |
|  | (0.504) | (0.509) | (0.512) | (0.509) | (0.509) | (0.510) | (0.511) | (0.507) | (0.516) | (0.515) | (0.510) | (0.510) | (0.515) | (0.512) |
|  |  |  |  |  |  |  |  |  |  |  |  |  |  |  |
| 2019 | -0.109 | -0.0977 | -0.0910 | -0.100 | -0.100 | -0.117 | -0.0937 | -0.0778 | -0.124 | -0.0817 | -0.0997 | -0.0999 | -0.126 | -0.0578 |
|  | (0.541) | (0.546) | (0.545) | (0.547) | (0.547) | (0.548) | (0.544) | (0.548) | (0.554) | (0.550) | (0.548) | (0.548) | (0.552) | (0.548) |
|  |  |  |  |  |  |  |  |  |  |  |  |  |  |  |
| MDMA | -0.304 | -0.272 | -0.339 | -0.341 | -0.341 | -0.346 | -0.333 | -0.277 | -1.448 | -0.318 | -0.337 | -0.339 | -0.336 | -0.311 |
|  | (0.488) | (0.535) | (0.497) | (0.499) | (0.499) | (0.498) | (0.497) | (0.479) | (1.660) | (0.487) | (0.497) | (0.497) | (0.489) | (0.488) |
|  |  |  |  |  |  |  |  |  |  |  |  |  |  |  |
| LCPU | 0.588 |  |  |  |  |  |  | 2.323 |  |  |  |  |  |  |
|  | (0.604) |  |  |  |  |  |  | (1.741) |  |  |  |  |  |  |
|  |  |  |  |  |  |  |  |  |  |  |  |  |  |  |
| Priv Hlth Ins | -1.123*** | -1.145*** | -1.136*** | -1.143*** | -1.143*** | -1.145*** | -1.138*** | -1.115*** | -1.162*** | -1.117*** | -1.147*** | -1.146*** | -1.150*** | -1.130*** |
|  | (0.278) | (0.283) | (0.279) | (0.282) | (0.282) | (0.281) | (0.281) | (0.277) | (0.282) | (0.275) | (0.282) | (0.282) | (0.282) | (0.280) |
|  |  |  |  |  |  |  |  |  |  |  |  |  |  |  |
| Pub Hlth Ins | -0.160 | -0.122 | -0.125 | -0.165 | -0.165 | -0.181 | -0.128 | 0.147 | 0.214 | 0.0474 | 0.0915 | 0.0979 | 0.0431 | 0.116 |
|  | (0.310) | (0.307) | (0.299) | (0.293) | (0.293) | (0.292) | (0.311) | (1.173) | (1.125) | (1.126) | (1.138) | (1.137) | (1.139) | (1.167) |
|  |  |  |  |  |  |  |  |  |  |  |  |  |  |  |
| Oth Hlth Ins | -0.230 | -0.244 | -0.236 | -0.239 | -0.239 | -0.242 | -0.238 | -0.205 | -0.259 | -0.208 | -0.236 | -0.235 | -0.244 | -0.212 |
|  | (0.496) | (0.502) | (0.502) | (0.502) | (0.502) | (0.502) | (0.503) | (0.496) | (0.503) | (0.503) | (0.503) | (0.503) | (0.504) | (0.502) |
|  |  |  |  |  |  |  |  |  |  |  |  |  |  |  |
| LCPU * Pub Hlth Ins | -0.152 |  |  |  |  |  |  | -0.0150 |  |  |  |  |  |  |
|  | (1.288) |  |  |  |  |  |  | (5.142) |  |  |  |  |  |  |
|  |  |  |  |  |  |  |  |  |  |  |  |  |  |  |
| Psilocybin |  | 0.572 | 0.680 | 0.602 | 0.602 | 0.603 | 0.552 |  | 0.543 | 1.856 | 0.603 | 0.605 | 0.607 | 0.584 |
|  |  | (0.741) | (0.736) | (0.727) | (0.727) | (0.728) | (0.752) |  | (0.727) | (2.118) | (0.725) | (0.725) | (0.725) | (0.743) |
|  |  |  |  |  |  |  |  |  |  |  |  |  |  |  |
| DMT |  | 8.887** | 8.866** | 8.965** | 8.965** | 8.967** | 8.881** |  | 8.750** | 9.010** | -8.926 | 8.955** | 8.939** | 9.127** |
|  |  | (2.729) | (2.741) | (2.740) | (2.740) | (2.738) | (2.722) |  | (2.677) | (2.784) | (6.092) | (2.736) | (2.732) | (2.895) |
|  |  |  |  |  |  |  |  |  |  |  |  |  |  |  |
| Ayahuasca |  | -3.053*** | -3.073*** | -3.056*** | -3.056*** | -3.056*** | -3.071*** |  | -3.059*** | -3.059*** | -3.062*** | -3.068*** | -3.074*** | -3.055*** |
|  |  | (0.746) | (0.753) | (0.747) | (0.747) | (0.747) | (0.749) |  | (0.751) | (0.751) | (0.752) | (0.752) | (0.754) | (0.744) |
|  |  |  |  |  |  |  |  |  |  |  |  |  |  |  |
| Peyote/Mescaline |  | -0.0738 | -0.0832 | -0.0499 | -0.0499 | -0.212 | -0.102 |  | 0.0506 | -0.246 | -0.0440 | -0.0453 | -1.320 | -0.206 |
|  |  | (1.024) | (1.024) | (1.029) | (1.029) | (1.064) | (1.014) |  | (1.024) | (1.042) | (1.029) | (1.030) | (3.134) | (1.067) |
|  |  |  |  |  |  |  |  |  |  |  |  |  |  |  |
| LSD |  | 0.0403 | 0.00133 | -0.00677 | -0.00677 | -0.00673 | 0.111 |  | 0.0429 | -0.0535 | -0.00289 | -0.00647 | 0.000692 | 2.673 |
|  |  | (0.742) | (0.749) | (0.746) | (0.746) | (0.748) | (0.759) |  | (0.726) | (0.761) | (0.747) | (0.747) | (0.749) | (1.961) |
|  |  |  |  |  |  |  |  |  |  |  |  |  |  |  |
| MDMA * Pub Hlth Ins |  | -0.552 |  |  |  |  |  |  | -2.713 |  |  |  |  |  |
|  |  | (1.195) |  |  |  |  |  |  | (4.023) |  |  |  |  |  |
|  |  |  |  |  |  |  |  |  |  |  |  |  |  |  |
| Psilocybin * Pub Hlth Ins |  |  | -0.892 |  |  |  |  |  |  | 5.270 |  |  |  |  |
|  |  |  | (1.665) |  |  |  |  |  |  | (7.096) |  |  |  |  |
|  |  |  |  |  |  |  |  |  |  |  |  |  |  |  |
| Peyote/Mescaline * Pub Hlth Ins |  |  |  |  |  | 2.032 |  |  |  |  |  |  | 0.813 |  |
|  |  |  |  |  |  | (1.837) |  |  |  |  |  |  | (5.216) |  |
|  |  |  |  |  |  |  |  |  |  |  |  |  |  |  |
| LSD * Pub Hlth Ins |  |  |  |  |  |  | -0.561 |  |  |  |  |  |  | 0.143 |
|  |  |  |  |  |  |  | (1.504) |  |  |  |  |  |  | (5.003) |
|  |  |  |  |  |  |  |  |  |  |  |  |  |  |  |
| LCPU * Education |  |  |  |  |  |  |  | -0.501 |  |  |  |  |  |  |
|  |  |  |  |  |  |  |  | (0.467) |  |  |  |  |  |  |
|  |  |  |  |  |  |  |  |  |  |  |  |  |  |  |
| Pub Hlth Ins * Education |  |  |  |  |  |  |  | -0.0883 | -0.113 | -0.0477 | -0.0810 | -0.0827 | -0.0719 | -0.0674 |
|  |  |  |  |  |  |  |  | (0.336) | (0.326) | (0.329) | (0.336) | (0.336) | (0.336) | (0.332) |
|  |  |  |  |  |  |  |  |  |  |  |  |  |  |  |
| LCPU * Pub Hlth Ins * Education |  |  |  |  |  |  |  | -0.109 |  |  |  |  |  |  |
|  |  |  |  |  |  |  |  | (1.777) |  |  |  |  |  |  |
|  |  |  |  |  |  |  |  |  |  |  |  |  |  |  |
| MDMA * Education |  |  |  |  |  |  |  |  | 0.349 |  |  |  |  |  |
|  |  |  |  |  |  |  |  |  | (0.452) |  |  |  |  |  |
|  |  |  |  |  |  |  |  |  |  |  |  |  |  |  |
| MDMA * Pub Hlth Ins * Education |  |  |  |  |  |  |  |  | 0.727 |  |  |  |  |  |
|  |  |  |  |  |  |  |  |  | (1.515) |  |  |  |  |  |
|  |  |  |  |  |  |  |  |  |  |  |  |  |  |  |
| Psilocybin * Education |  |  |  |  |  |  |  |  |  | -0.336 |  |  |  |  |
|  |  |  |  |  |  |  |  |  |  | (0.547) |  |  |  |  |
|  |  |  |  |  |  |  |  |  |  |  |  |  |  |  |
| Psilocybin * Pub Hlth Ins * Education |  |  |  |  |  |  |  |  |  | -1.896 |  |  |  |  |
|  |  |  |  |  |  |  |  |  |  | (2.494) |  |  |  |  |
|  |  |  |  |  |  |  |  |  |  |  |  |  |  |  |
| DMT * Education |  |  |  |  |  |  |  |  |  |  | 4.769* |  |  |  |
|  |  |  |  |  |  |  |  |  |  |  | (1.961) |  |  |  |
|  |  |  |  |  |  |  |  |  |  |  |  |  |  |  |
| Peyote/Mescaline * Education |  |  |  |  |  |  |  |  |  |  |  |  | 0.355 |  |
|  |  |  |  |  |  |  |  |  |  |  |  |  | (0.939) |  |
|  |  |  |  |  |  |  |  |  |  |  |  |  |  |  |
| Peyote/Mescaline * Pub Hlth Ins * Education |  |  |  |  |  |  |  |  |  |  |  |  | 0.485 |  |
|  |  |  |  |  |  |  |  |  |  |  |  |  | (1.852) |  |
|  |  |  |  |  |  |  |  |  |  |  |  |  |  |  |
| LSD * Education |  |  |  |  |  |  |  |  |  |  |  |  |  | -0.756 |
|  |  |  |  |  |  |  |  |  |  |  |  |  |  | (0.533) |
|  |  |  |  |  |  |  |  |  |  |  |  |  |  |  |
| LSD * Pub Hlth Ins * Education |  |  |  |  |  |  |  |  |  |  |  |  |  | -0.328 |
|  |  |  |  |  |  |  |  |  |  |  |  |  |  | (1.783) |
|  |  |  |  |  |  |  |  |  |  |  |  |  |  |  |
| Constant | 15.55*** | 15.55*** | 15.54*** | 15.55*** | 15.55*** | 15.55*** | 15.54*** | 15.33*** | 15.64*** | 15.40*** | 15.50*** | 15.49*** | 15.53*** | 15.34*** |
|  | (0.944) | (0.956) | (0.951) | (0.952) | (0.952) | (0.952) | (0.950) | (0.971) | (0.977) | (0.978) | (0.960) | (0.960) | (0.975) | (0.958) |
| Observations | 5886 | 5886 | 5886 | 5886 | 5886 | 5886 | 5886 | 5886 | 5886 | 5886 | 5886 | 5886 | 5886 | 5886 |
| *R*2 | 0.151 | 0.153 | 0.153 | 0.153 | 0.153 | 0.153 | 0.153 | 0.151 | 0.153 | 0.153 | 0.153 | 0.153 | 0.153 | 0.153 |

Standard errors in parentheses

Source: 2008-2019 National Survey of Drug Use and Health, n=484,732

aMen serve as the references category for Women

bSingle Serves as the reference category for Marital Statuses

c2008 serves as the reference category for the year survey was taken

† *p* < .10, * *p* < .05, ** *p* < .01, *** *p* < .001

Supplemental Table 18. Weighted Multivariate Ordinary Least Square Regression Predicting Psychological Distress Among NHOPI with Private Health Insurance Interaction Terms

|  | Model 1 | Model 2 | Model 3 | Model 4 | Model 5 | Model 6 | Model 7 | Model 8 | Model 9 | Model 10 | Model 11 | Model 12 | Model 13 | Model 14 |
| --- | --- | --- | --- | --- | --- | --- | --- | --- | --- | --- | --- | --- | --- | --- |
| Age | -0.186 | -0.185 | -0.184 | -0.189 | -0.189 | -0.208 | -0.175 | -0.174 | -0.161 | -0.174 | -0.188 | -0.188 | -0.202 | -0.170 |
|  | (0.177) | (0.175) | (0.175) | (0.174) | (0.174) | (0.176) | (0.174) | (0.185) | (0.181) | (0.180) | (0.177) | (0.177) | (0.179) | (0.182) |
|  |  |  |  |  |  |  |  |  |  |  |  |  |  |  |
| Education | 0.439 | 0.398 | 0.397 | 0.399 | 0.399 | 0.428 | 0.420 | 0.604 | 0.571 | 0.590 | 0.412 | 0.412 | 0.590 | 0.662 |
|  | (0.328) | (0.334) | (0.338) | (0.335) | (0.335) | (0.336) | (0.335) | (0.545) | (0.549) | (0.539) | (0.502) | (0.502) | (0.529) | (0.524) |
|  |  |  |  |  |  |  |  |  |  |  |  |  |  |  |
| Family Income | -0.104 | -0.0685 | -0.0857 | -0.0928 | -0.0928 | -0.0830 | -0.0857 | -0.101 | -0.0878 | -0.0849 | -0.0927 | -0.0927 | -0.0856 | -0.0867 |
|  | (0.137) | (0.141) | (0.140) | (0.140) | (0.140) | (0.141) | (0.141) | (0.139) | (0.144) | (0.141) | (0.140) | (0.140) | (0.140) | (0.143) |
|  |  |  |  |  |  |  |  |  |  |  |  |  |  |  |
| aWomen | 0.634 | 0.362 | 0.393 | 0.380 | 0.380 | 0.406 | 0.391 | 0.595 | 0.371 | 0.423 | 0.383 | 0.383 | 0.464 | 0.436 |
|  | (0.586) | (0.603) | (0.603) | (0.604) | (0.604) | (0.599) | (0.601) | (0.577) | (0.594) | (0.590) | (0.597) | (0.597) | (0.587) | (0.584) |
|  |  |  |  |  |  |  |  |  |  |  |  |  |  |  |
| bMarried | -1.881* | -2.019* | -1.991* | -1.997* | -1.997* | -1.844* | -1.992* | -1.916* | -2.102* | -2.020* | -2.000* | -2.000* | -1.806* | -1.888* |
|  | (0.874) | (0.869) | (0.864) | (0.863) | (0.863) | (0.872) | (0.866) | (0.900) | (0.875) | (0.886) | (0.856) | (0.856) | (0.869) | (0.888) |
|  |  |  |  |  |  |  |  |  |  |  |  |  |  |  |
| Widowed | -4.124* | -4.148* | -4.153* | -4.223* | -4.223* | -4.047* | -4.156* | -4.298** | -4.354** | -4.336** | -4.233** | -4.233** | -4.075* | -4.147** |
|  | (1.597) | (1.611) | (1.612) | (1.606) | (1.606) | (1.613) | (1.604) | (1.549) | (1.562) | (1.558) | (1.543) | (1.543) | (1.545) | (1.542) |
|  |  |  |  |  |  |  |  |  |  |  |  |  |  |  |
| Divorced | -2.010* | -1.904* | -1.980* | -1.988* | -1.988* | -1.813† | -2.005* | -1.955* | -2.037* | -1.925* | -1.990* | -1.990* | -1.879* | -1.958* |
|  | (0.939) | (0.936) | (0.919) | (0.912) | (0.912) | (0.933) | (0.914) | (0.931) | (0.943) | (0.911) | (0.907) | (0.907) | (0.925) | (0.909) |
|  |  |  |  |  |  |  |  |  |  |  |  |  |  |  |
| Religious Salience | -0.0378 | -0.0465 | -0.0540 | -0.0472 | -0.0472 | -0.0590 | -0.0557 | -0.0492 | -0.0657 | -0.0671 | -0.0477 | -0.0477 | -0.0622 | -0.0617 |
|  | (0.112) | (0.111) | (0.110) | (0.111) | (0.111) | (0.112) | (0.110) | (0.108) | (0.109) | (0.108) | (0.110) | (0.110) | (0.109) | (0.107) |
|  |  |  |  |  |  |  |  |  |  |  |  |  |  |  |
| Religious Attendance | -0.179 | -0.184 | -0.176 | -0.182 | -0.182 | -0.172 | -0.179 | -0.150 | -0.176 | -0.145 | -0.182 | -0.182 | -0.184 | -0.172 |
|  | (0.184) | (0.185) | (0.186) | (0.184) | (0.184) | (0.186) | (0.186) | (0.179) | (0.183) | (0.180) | (0.181) | (0.181) | (0.183) | (0.182) |
|  |  |  |  |  |  |  |  |  |  |  |  |  |  |  |
| Cocaine | 1.802† | 1.857† | 1.986* | 1.988* | 1.988* | 1.872† | 2.056* | 1.931† | 1.914* | 2.060* | 1.987* | 1.987* | 1.914† | 2.097* |
|  | (1.070) | (1.003) | (0.939) | (0.950) | (0.950) | (0.967) | (0.910) | (0.987) | (0.959) | (0.892) | (0.949) | (0.949) | (0.973) | (0.895) |
|  |  |  |  |  |  |  |  |  |  |  |  |  |  |  |
| Stimulant | 0.753 | 0.690 | 0.836 | 0.800 | 0.800 | 0.747 | 0.913 | 0.383 | 0.597 | 0.537 | 0.802 | 0.802 | 0.566 | 0.612 |
|  | (1.012) | (0.897) | (0.949) | (0.937) | (0.937) | (0.937) | (0.992) | (0.960) | (0.875) | (0.900) | (0.938) | (0.938) | (0.906) | (0.987) |
|  |  |  |  |  |  |  |  |  |  |  |  |  |  |  |
| Sedative | 1.346 | 1.198 | 1.045 | 1.072 | 1.072 | 0.972 | 1.086 | 1.326 | 1.274 | 1.052 | 1.072 | 1.072 | 0.941 | 0.962 |
|  | (1.374) | (1.425) | (1.350) | (1.332) | (1.332) | (1.323) | (1.380) | (1.352) | (1.456) | (1.318) | (1.331) | (1.331) | (1.330) | (1.396) |
|  |  |  |  |  |  |  |  |  |  |  |  |  |  |  |
| Tranquilizer | 1.450 | 1.793 | 1.848 | 1.743 | 1.743 | 1.930 | 1.800 | 1.637 | 1.867 | 1.990 | 1.741 | 1.741 | 1.866 | 1.880 |
|  | (1.290) | (1.232) | (1.254) | (1.226) | (1.226) | (1.201) | (1.221) | (1.236) | (1.223) | (1.213) | (1.224) | (1.224) | (1.189) | (1.169) |
|  |  |  |  |  |  |  |  |  |  |  |  |  |  |  |
| Heroine | 0.695 | 1.332 | 1.302 | 1.316 | 1.316 | 1.256 | 1.442 | 0.512 | 1.382 | 0.950 | 1.319 | 1.319 | 0.979 | 1.155 |
|  | (2.500) | (2.580) | (2.577) | (2.603) | (2.603) | (2.565) | (2.600) | (2.587) | (2.678) | (2.571) | (2.611) | (2.611) | (2.731) | (2.702) |
|  |  |  |  |  |  |  |  |  |  |  |  |  |  |  |
| Pain Killers | 0.256 | 0.118 | 0.116 | 0.0958 | 0.0958 | 0.0810 | 0.134 | 0.154 | 0.0602 | 0.0315 | 0.0962 | 0.0962 | 0.00162 | 0.0839 |
|  | (0.603) | (0.589) | (0.597) | (0.595) | (0.595) | (0.594) | (0.599) | (0.602) | (0.586) | (0.595) | (0.597) | (0.597) | (0.601) | (0.597) |
|  |  |  |  |  |  |  |  |  |  |  |  |  |  |  |
| Marijuana | 1.642* | 1.617* | 1.590* | 1.615* | 1.615* | 1.583* | 1.581* | 1.654* | 1.642* | 1.567* | 1.617* | 1.617* | 1.644* | 1.670* |
|  | (0.730) | (0.743) | (0.742) | (0.747) | (0.747) | (0.742) | (0.743) | (0.732) | (0.725) | (0.746) | (0.745) | (0.745) | (0.733) | (0.740) |
|  |  |  |  |  |  |  |  |  |  |  |  |  |  |  |
| PCP | -5.623*** | -4.943*** | -5.264*** | -4.990*** | -4.990*** | -4.633*** | -5.314*** | -5.346** | -5.181*** | -4.651** | -4.994*** | -4.994*** | -5.279*** | -5.497*** |
|  | (1.514) | (1.408) | (1.496) | (1.411) | (1.411) | (1.335) | (1.522) | (1.596) | (1.461) | (1.556) | (1.424) | (1.424) | (1.378) | (1.549) |
|  |  |  |  |  |  |  |  |  |  |  |  |  |  |  |
| Inhalants | -2.978*** | -2.646*** | -2.653*** | -2.601*** | -2.601*** | -2.625*** | -2.731*** | -2.330*** | -2.532*** | -2.095** | -2.600*** | -2.600*** | -2.297** | -2.438*** |
|  | (0.676) | (0.649) | (0.653) | (0.648) | (0.648) | (0.627) | (0.668) | (0.657) | (0.641) | (0.657) | (0.648) | (0.648) | (0.673) | (0.643) |
|  |  |  |  |  |  |  |  |  |  |  |  |  |  |  |
| Tobacco | 0.0867 | 0.0222 | 0.00339 | 0.0257 | 0.0257 | -0.0350 | 0.00196 | 0.0417 | -0.0270 | -0.0270 | 0.0254 | 0.0254 | -0.0464 | -0.0202 |
|  | (0.699) | (0.698) | (0.703) | (0.707) | (0.707) | (0.694) | (0.699) | (0.701) | (0.708) | (0.700) | (0.708) | (0.708) | (0.691) | (0.694) |
|  |  |  |  |  |  |  |  |  |  |  |  |  |  |  |
| Age of 1st Alcohol Use | 0.210 | 0.186 | 0.187 | 0.204 | 0.204 | 0.190 | 0.185 | 0.153 | 0.175 | 0.147 | 0.205 | 0.205 | 0.186 | 0.174 |
|  | (0.409) | (0.405) | (0.409) | (0.406) | (0.406) | (0.406) | (0.405) | (0.407) | (0.405) | (0.412) | (0.404) | (0.404) | (0.402) | (0.401) |
|  |  |  |  |  |  |  |  |  |  |  |  |  |  |  |
| Risky Behaviors | 0.747* | 0.750* | 0.764* | 0.734* | 0.734* | 0.776* | 0.760* | 0.746* | 0.720* | 0.761* | 0.733* | 0.733* | 0.755* | 0.764* |
|  | (0.346) | (0.345) | (0.347) | (0.342) | (0.342) | (0.340) | (0.344) | (0.344) | (0.343) | (0.352) | (0.342) | (0.342) | (0.339) | (0.342) |
|  |  |  |  |  |  |  |  |  |  |  |  |  |  |  |
| c2009 | 0.288 | 0.0646 | -0.0224 | 0.0358 | 0.0358 | -0.0427 | -0.0777 | -0.0740 | 0.0341 | -0.224 | 0.0299 | 0.0299 | -0.181 | -0.307 |
|  | (2.013) | (1.971) | (1.975) | (1.954) | (1.954) | (1.970) | (1.988) | (1.992) | (1.982) | (1.962) | (1.949) | (1.949) | (1.969) | (1.981) |
|  |  |  |  |  |  |  |  |  |  |  |  |  |  |  |
| 2010 | 0.124 | 0.366 | 0.242 | 0.260 | 0.260 | 0.186 | 0.190 | 0.176 | 0.327 | 0.323 | 0.263 | 0.263 | 0.172 | 0.114 |
|  | (1.499) | (1.518) | (1.494) | (1.485) | (1.485) | (1.477) | (1.500) | (1.500) | (1.497) | (1.487) | (1.480) | (1.480) | (1.482) | (1.494) |
|  |  |  |  |  |  |  |  |  |  |  |  |  |  |  |
| 2011 | 2.464 | 2.603 | 2.624 | 2.650 | 2.650 | 2.717 | 2.572 | 2.538 | 2.638 | 2.687 | 2.647 | 2.647 | 2.743 | 2.581 |
|  | (1.977) | (1.982) | (1.965) | (1.964) | (1.964) | (1.958) | (1.982) | (1.954) | (1.988) | (1.939) | (1.964) | (1.964) | (1.959) | (1.969) |
|  |  |  |  |  |  |  |  |  |  |  |  |  |  |  |
| 2012 | 1.132 | 1.104 | 1.113 | 1.132 | 1.132 | 1.082 | 1.073 | 1.117 | 1.251 | 1.228 | 1.135 | 1.135 | 1.074 | 0.967 |
|  | (1.361) | (1.358) | (1.355) | (1.343) | (1.343) | (1.349) | (1.358) | (1.305) | (1.354) | (1.301) | (1.335) | (1.335) | (1.335) | (1.320) |
|  |  |  |  |  |  |  |  |  |  |  |  |  |  |  |
| 2013 | -0.450 | -0.628 | -0.690 | -0.736 | -0.736 | -0.921 | -0.749 | -0.605 | -0.673 | -0.660 | -0.736 | -0.736 | -0.890 | -0.853 |
|  | (1.483) | (1.478) | (1.470) | (1.441) | (1.441) | (1.439) | (1.469) | (1.490) | (1.484) | (1.470) | (1.441) | (1.441) | (1.429) | (1.462) |
|  |  |  |  |  |  |  |  |  |  |  |  |  |  |  |
| 2014 | 1.059 | 1.032 | 1.034 | 0.986 | 0.986 | 1.170 | 1.003 | 0.780 | 0.904 | 0.927 | 0.987 | 0.987 | 0.965 | 0.766 |
|  | (1.547) | (1.527) | (1.535) | (1.526) | (1.526) | (1.521) | (1.528) | (1.536) | (1.529) | (1.542) | (1.527) | (1.527) | (1.544) | (1.536) |
|  |  |  |  |  |  |  |  |  |  |  |  |  |  |  |
| 2015 | 1.414 | 1.415 | 1.422 | 1.387 | 1.387 | 1.427 | 1.357 | 1.402 | 1.518 | 1.512 | 1.387 | 1.387 | 1.401 | 1.287 |
|  | (1.503) | (1.521) | (1.507) | (1.515) | (1.515) | (1.516) | (1.511) | (1.514) | (1.496) | (1.509) | (1.515) | (1.515) | (1.516) | (1.507) |
|  |  |  |  |  |  |  |  |  |  |  |  |  |  |  |
| 2016 | 0.568 | 0.416 | 0.415 | 0.379 | 0.379 | 0.303 | 0.381 | 0.556 | 0.464 | 0.506 | 0.377 | 0.377 | 0.282 | 0.370 |
|  | (1.397) | (1.392) | (1.392) | (1.386) | (1.386) | (1.393) | (1.394) | (1.392) | (1.408) | (1.379) | (1.398) | (1.398) | (1.400) | (1.395) |
|  |  |  |  |  |  |  |  |  |  |  |  |  |  |  |
| 2017 | 2.045 | 2.221 | 2.202 | 2.213 | 2.213 | 2.101 | 2.130 | 1.956 | 2.194 | 2.167 | 2.211 | 2.211 | 1.988 | 1.989 |
|  | (1.427) | (1.446) | (1.443) | (1.441) | (1.441) | (1.433) | (1.436) | (1.433) | (1.458) | (1.449) | (1.452) | (1.452) | (1.449) | (1.436) |
|  |  |  |  |  |  |  |  |  |  |  |  |  |  |  |
| 2018 | 2.134 | 2.081 | 1.914 | 2.102 | 2.102 | 2.114 | 1.908 | 2.181 | 2.061 | 2.068 | 2.101 | 2.101 | 2.121 | 1.992 |
|  | (1.438) | (1.416) | (1.445) | (1.412) | (1.412) | (1.414) | (1.440) | (1.418) | (1.394) | (1.419) | (1.413) | (1.413) | (1.420) | (1.438) |
|  |  |  |  |  |  |  |  |  |  |  |  |  |  |  |
| 2019 | -0.533 | -0.600 | -0.583 | -0.539 | -0.539 | -0.569 | -0.653 | -0.518 | -0.443 | -0.420 | -0.536 | -0.536 | -0.596 | -0.744 |
|  | (1.458) | (1.467) | (1.465) | (1.446) | (1.446) | (1.445) | (1.469) | (1.441) | (1.447) | (1.423) | (1.441) | (1.441) | (1.445) | (1.452) |
|  |  |  |  |  |  |  |  |  |  |  |  |  |  |  |
| MDMA | 0.263 | -0.585 | 0.141 | 0.140 | 0.140 | 0.485 | 0.141 | -0.237 | 1.859 | -0.259 | 0.139 | 0.139 | 0.408 | 0.0438 |
|  | (0.857) | (1.096) | (0.737) | (0.730) | (0.730) | (0.760) | (0.745) | (0.829) | (2.698) | (0.741) | (0.730) | (0.730) | (0.758) | (0.770) |
|  |  |  |  |  |  |  |  |  |  |  |  |  |  |  |
| LCPU | -2.543† |  |  |  |  |  |  | 2.207 |  |  |  |  |  |  |
|  | (1.294) |  |  |  |  |  |  | (3.592) |  |  |  |  |  |  |
|  |  |  |  |  |  |  |  |  |  |  |  |  |  |  |
| Priv Hlth Ins | 0.548 | 0.470 | 0.538 | 0.734 | 0.734 | 0.470 | 0.514 | 1.713 | 1.386 | 1.702 | 0.795 | 0.795 | 1.092 | 1.451 |
|  | (0.829) | (0.890) | (0.868) | (0.770) | (0.770) | (0.788) | (0.811) | (1.772) | (1.858) | (1.732) | (1.649) | (1.649) | (1.673) | (1.715) |
|  |  |  |  |  |  |  |  |  |  |  |  |  |  |  |
| Pub Hlth Ins | 0.998 | 1.096 | 1.087 | 1.155 | 1.155 | 1.110 | 1.114 | 1.014 | 1.086 | 1.052 | 1.154 | 1.154 | 1.134 | 1.114 |
|  | (0.815) | (0.800) | (0.819) | (0.793) | (0.793) | (0.790) | (0.800) | (0.789) | (0.796) | (0.799) | (0.791) | (0.791) | (0.780) | (0.782) |
|  |  |  |  |  |  |  |  |  |  |  |  |  |  |  |
| Oth Hlth Ins | -1.917 | -2.038 | -1.999 | -1.909 | -1.909 | -2.005 | -2.033 | -1.957 | -2.101 | -2.074 | -1.917 | -1.917 | -2.005 | -2.047 |
|  | (2.339) | (2.354) | (2.349) | (2.342) | (2.342) | (2.363) | (2.339) | (2.403) | (2.408) | (2.424) | (2.344) | (2.344) | (2.357) | (2.366) |
|  |  |  |  |  |  |  |  |  |  |  |  |  |  |  |
| LCPU * Priv Hlth Ins | 2.446 |  |  |  |  |  |  | -11.22** |  |  |  |  |  |  |
|  | (1.667) |  |  |  |  |  |  | (4.127) |  |  |  |  |  |  |
|  |  |  |  |  |  |  |  |  |  |  |  |  |  |  |
| Psilocybin |  | 2.034* | 1.089 | 2.118* | 2.118* | 1.995* | 2.238* |  | 1.505 | 4.110 | 2.122* | 2.122* | 2.106* | 2.108* |
|  |  | (0.997) | (1.543) | (1.004) | (1.004) | (0.970) | (1.044) |  | (1.032) | (3.187) | (1.000) | (1.000) | (0.961) | (1.051) |
|  |  |  |  |  |  |  |  |  |  |  |  |  |  |  |
| Peyote/Mescaline |  | -4.780** | -4.916** | -5.141** | -5.141** | -8.176*** | -4.937** |  | -4.277* | -4.225* | -5.143** | -5.143** | -2.288 | -4.376* |
|  |  | (1.807) | (1.636) | (1.708) | (1.708) | (1.853) | (1.666) |  | (2.058) | (1.838) | (1.714) | (1.714) | (5.571) | (1.864) |
|  |  |  |  |  |  |  |  |  |  |  |  |  |  |  |
| LSD |  | -3.080** | -2.978* | -3.219** | -3.219** | -3.285** | -4.208** |  | -2.817* | -2.498* | -3.225** | -3.225** | -3.283** | 0.905 |
|  |  | (1.158) | (1.169) | (1.093) | (1.093) | (1.071) | (1.442) |  | (1.164) | (1.188) | (1.098) | (1.098) | (1.093) | (3.577) |
|  |  |  |  |  |  |  |  |  |  |  |  |  |  |  |
| MDMA * Priv Hlth Ins |  | 1.431 |  |  |  |  |  |  | -7.220 |  |  |  |  |  |
|  |  | (1.865) |  |  |  |  |  |  | (5.125) |  |  |  |  |  |
|  |  |  |  |  |  |  |  |  |  |  |  |  |  |  |
| Psilocybin * Priv Hlth Ins |  |  | 1.573 |  |  |  |  |  |  | -10.97* |  |  |  |  |
|  |  |  | (1.911) |  |  |  |  |  |  | (4.664) |  |  |  |  |
|  |  |  |  |  |  |  |  |  |  |  |  |  |  |  |
| Peyote/Mescaline * Priv Hlth Ins |  |  |  |  |  | 8.887** |  |  |  |  |  |  | -8.522 |  |
|  |  |  |  |  |  | (2.660) |  |  |  |  |  |  | (8.758) |  |
|  |  |  |  |  |  |  |  |  |  |  |  |  |  |  |
| LSD * Priv Hlth Ins |  |  |  |  |  |  | 1.750 |  |  |  |  |  |  | -7.976† |
|  |  |  |  |  |  |  | (1.937) |  |  |  |  |  |  | (4.365) |
|  |  |  |  |  |  |  |  |  |  |  |  |  |  |  |
| LCPU * Education |  |  |  |  |  |  |  | -1.869 |  |  |  |  |  |  |
|  |  |  |  |  |  |  |  | (1.413) |  |  |  |  |  |  |
|  |  |  |  |  |  |  |  |  |  |  |  |  |  |  |
| Priv Hlth Ins * Education |  |  |  |  |  |  |  | -0.450 | -0.336 | -0.462 | -0.0240 | -0.0240 | -0.239 | -0.373 |
|  |  |  |  |  |  |  |  | (0.649) | (0.654) | (0.630) | (0.579) | (0.579) | (0.604) | (0.613) |
|  |  |  |  |  |  |  |  |  |  |  |  |  |  |  |
| LCPU * Priv Hlth Ins * Education |  |  |  |  |  |  |  | 4.817** |  |  |  |  |  |  |
|  |  |  |  |  |  |  |  | (1.536) |  |  |  |  |  |  |
|  |  |  |  |  |  |  |  |  |  |  |  |  |  |  |
| MDMA * Education |  |  |  |  |  |  |  |  | -1.010 |  |  |  |  |  |
|  |  |  |  |  |  |  |  |  | (1.145) |  |  |  |  |  |
|  |  |  |  |  |  |  |  |  |  |  |  |  |  |  |
| MDMA * Priv Hlth Ins * Education |  |  |  |  |  |  |  |  | 3.059 |  |  |  |  |  |
|  |  |  |  |  |  |  |  |  | (1.842) |  |  |  |  |  |
|  |  |  |  |  |  |  |  |  |  |  |  |  |  |  |
| Psilocybin * Education |  |  |  |  |  |  |  |  |  | -1.472 |  |  |  |  |
|  |  |  |  |  |  |  |  |  |  | (1.364) |  |  |  |  |
|  |  |  |  |  |  |  |  |  |  |  |  |  |  |  |
| Psilocybin * Priv Hlth Ins * Education |  |  |  |  |  |  |  |  |  | 4.390* |  |  |  |  |
|  |  |  |  |  |  |  |  |  |  | (1.733) |  |  |  |  |
|  |  |  |  |  |  |  |  |  |  |  |  |  |  |  |
| Peyote/Mescaline * Education |  |  |  |  |  |  |  |  |  |  |  |  | -2.022 |  |
|  |  |  |  |  |  |  |  |  |  |  |  |  | (1.597) |  |
|  |  |  |  |  |  |  |  |  |  |  |  |  |  |  |
| Peyote/Mescaline * Priv Hlth Ins * Education |  |  |  |  |  |  |  |  |  |  |  |  | 6.178* |  |
|  |  |  |  |  |  |  |  |  |  |  |  |  | (2.876) |  |
|  |  |  |  |  |  |  |  |  |  |  |  |  |  |  |
| LSD * Education |  |  |  |  |  |  |  |  |  |  |  |  |  | -2.037 |
|  |  |  |  |  |  |  |  |  |  |  |  |  |  | (1.323) |
|  |  |  |  |  |  |  |  |  |  |  |  |  |  |  |
| LSD * Priv Hlth Ins * Education |  |  |  |  |  |  |  |  |  |  |  |  |  | 3.713* |
|  |  |  |  |  |  |  |  |  |  |  |  |  |  | (1.790) |
|  |  |  |  |  |  |  |  |  |  |  |  |  |  |  |
| Constant | 8.856* | 9.200** | 9.235** | 9.178** | 9.178** | 9.418** | 9.118** | 8.626* | 8.777* | 8.826* | 9.135* | 9.135* | 9.049* | 8.551* |
|  | (3.372) | (3.338) | (3.319) | (3.291) | (3.291) | (3.303) | (3.308) | (3.494) | (3.436) | (3.446) | (3.459) | (3.459) | (3.444) | (3.456) |
| Observations | 630 | 630 | 630 | 630 | 630 | 630 | 630 | 630 | 630 | 630 | 630 | 630 | 630 | 630 |
| *R*2 | 0.222 | 0.242 | 0.242 | 0.240 | 0.240 | 0.249 | 0.242 | 0.234 | 0.246 | 0.250 | 0.240 | 0.240 | 0.253 | 0.248 |

Standard errors in parentheses

Source: 2008-2019 National Survey of Drug Use and Health, n=484,732

aMen serve as the references category for Women

bSingle Serves as the reference category for Marital Statuses

c2008 serves as the reference category for the year survey was taken

† *p* < .10, * *p* < .05, ** *p* < .01, *** *p* < .001

Supplemental Table 19. Weighted Multivariate Ordinary Least Square Regression Predicting Psychological Distress Among NHOPI with Public Health Insurance Interaction Terms

|  | Model 1 | Model 2 | Model 3 | Model 4 | Model 5 | Model 6 | Model 7 | Model 8 | Model 9 | Model 10 | Model 11 | Model 12 | Model 13 | Model 14 |
| --- | --- | --- | --- | --- | --- | --- | --- | --- | --- | --- | --- | --- | --- | --- |
| Age | -0.212 | -0.203 | -0.204 | -0.189 | -0.189 | -0.186 | -0.195 | -0.217 | -0.204 | -0.220 | -0.203 | -0.203 | -0.203 | -0.215 |
|  | (0.175) | (0.179) | (0.171) | (0.174) | (0.174) | (0.173) | (0.174) | (0.177) | (0.182) | (0.171) | (0.172) | (0.172) | (0.172) | (0.176) |
|  |  |  |  |  |  |  |  |  |  |  |  |  |  |  |
| Education | 0.436 | 0.399 | 0.394 | 0.399 | 0.399 | 0.410 | 0.423 | 0.568 | 0.621 | 0.505 | 0.678† | 0.678† | 0.717* | 0.680† |
|  | (0.323) | (0.334) | (0.337) | (0.335) | (0.335) | (0.334) | (0.332) | (0.375) | (0.376) | (0.373) | (0.342) | (0.342) | (0.356) | (0.361) |
|  |  |  |  |  |  |  |  |  |  |  |  |  |  |  |
| Family Income | -0.113 | -0.0851 | -0.0897 | -0.0928 | -0.0928 | -0.0901 | -0.0924 | -0.0933 | -0.0676 | -0.0769 | -0.0775 | -0.0775 | -0.0802 | -0.0806 |
|  | (0.138) | (0.138) | (0.141) | (0.140) | (0.140) | (0.139) | (0.141) | (0.137) | (0.138) | (0.142) | (0.137) | (0.137) | (0.137) | (0.141) |
|  |  |  |  |  |  |  |  |  |  |  |  |  |  |  |
| aWomen | 0.592 | 0.387 | 0.353 | 0.380 | 0.380 | 0.386 | 0.351 | 0.495 | 0.343 | 0.273 | 0.373 | 0.373 | 0.368 | 0.292 |
|  | (0.581) | (0.601) | (0.595) | (0.604) | (0.604) | (0.601) | (0.602) | (0.561) | (0.581) | (0.578) | (0.586) | (0.586) | (0.577) | (0.583) |
|  |  |  |  |  |  |  |  |  |  |  |  |  |  |  |
| bMarried | -1.916* | -1.978* | -2.018* | -1.997* | -1.997* | -1.981* | -2.019* | -1.905* | -2.009* | -1.954* | -1.946* | -1.946* | -1.884* | -1.915* |
|  | (0.875) | (0.865) | (0.862) | (0.863) | (0.863) | (0.864) | (0.863) | (0.880) | (0.866) | (0.865) | (0.849) | (0.849) | (0.850) | (0.868) |
|  |  |  |  |  |  |  |  |  |  |  |  |  |  |  |
| Widowed | -4.386** | -4.265** | -4.348** | -4.223* | -4.223* | -4.126* | -4.301** | -4.558** | -4.526** | -4.432** | -4.437** | -4.437** | -4.290** | -4.376** |
|  | (1.609) | (1.588) | (1.602) | (1.606) | (1.606) | (1.605) | (1.605) | (1.573) | (1.552) | (1.570) | (1.543) | (1.543) | (1.559) | (1.562) |
|  |  |  |  |  |  |  |  |  |  |  |  |  |  |  |
| Divorced | -2.122* | -1.916* | -2.066* | -1.988* | -1.988* | -1.957* | -2.056* | -2.124* | -2.050* | -2.005* | -2.089* | -2.089* | -2.038* | -2.052* |
|  | (0.917) | (0.920) | (0.913) | (0.912) | (0.912) | (0.908) | (0.905) | (0.923) | (0.921) | (0.914) | (0.908) | (0.908) | (0.903) | (0.911) |
|  |  |  |  |  |  |  |  |  |  |  |  |  |  |  |
| Religious Salience | -0.0134 | -0.0441 | -0.0375 | -0.0472 | -0.0472 | -0.0422 | -0.0401 | -0.0396 | -0.0616 | -0.0632 | -0.0601 | -0.0601 | -0.0606 | -0.0550 |
|  | (0.114) | (0.112) | (0.113) | (0.111) | (0.111) | (0.110) | (0.113) | (0.114) | (0.111) | (0.115) | (0.110) | (0.110) | (0.110) | (0.113) |
|  |  |  |  |  |  |  |  |  |  |  |  |  |  |  |
| Religious Attendance | -0.179 | -0.178 | -0.172 | -0.182 | -0.182 | -0.207 | -0.182 | -0.0980 | -0.130 | -0.0909 | -0.135 | -0.135 | -0.154 | -0.125 |
|  | (0.182) | (0.184) | (0.184) | (0.184) | (0.184) | (0.184) | (0.185) | (0.190) | (0.187) | (0.191) | (0.188) | (0.188) | (0.188) | (0.191) |
|  |  |  |  |  |  |  |  |  |  |  |  |  |  |  |
| Cocaine | 1.720 | 1.861† | 1.918* | 1.988* | 1.988* | 2.110* | 2.011* | 1.942† | 1.934* | 2.068* | 2.033* | 2.033* | 2.115* | 2.090* |
|  | (1.089) | (0.984) | (0.959) | (0.950) | (0.950) | (0.973) | (0.939) | (0.988) | (0.944) | (0.887) | (0.942) | (0.942) | (0.973) | (0.902) |
|  |  |  |  |  |  |  |  |  |  |  |  |  |  |  |
| Stimulant | 0.816 | 0.829 | 0.957 | 0.800 | 0.800 | 0.628 | 0.935 | 0.699 | 0.764 | 0.827 | 0.727 | 0.727 | 0.481 | 0.774 |
|  | (0.937) | (0.934) | (0.891) | (0.937) | (0.937) | (0.957) | (0.910) | (0.931) | (0.935) | (0.881) | (0.936) | (0.936) | (0.922) | (0.913) |
|  |  |  |  |  |  |  |  |  |  |  |  |  |  |  |
| Sedative | 1.381 | 1.242 | 1.041 | 1.072 | 1.072 | 1.103 | 1.062 | 1.840 | 1.451 | 1.496 | 1.200 | 1.200 | 1.229 | 1.350 |
|  | (1.260) | (1.315) | (1.297) | (1.332) | (1.332) | (1.316) | (1.318) | (1.179) | (1.317) | (1.178) | (1.275) | (1.275) | (1.262) | (1.229) |
|  |  |  |  |  |  |  |  |  |  |  |  |  |  |  |
| Tranquilizer | 1.397 | 1.731 | 1.882 | 1.743 | 1.743 | 1.674 | 1.806 | 1.617 | 1.860 | 2.133† | 1.827 | 1.827 | 1.769 | 1.969 |
|  | (1.296) | (1.254) | (1.248) | (1.226) | (1.226) | (1.223) | (1.232) | (1.277) | (1.268) | (1.242) | (1.205) | (1.205) | (1.192) | (1.215) |
|  |  |  |  |  |  |  |  |  |  |  |  |  |  |  |
| Heroine | 0.725 | 1.342 | 1.291 | 1.316 | 1.316 | 1.516 | 1.456 | 1.174 | 1.613 | 1.465 | 1.450 | 1.450 | 1.419 | 1.762 |
|  | (2.632) | (2.626) | (2.582) | (2.603) | (2.603) | (2.655) | (2.657) | (2.653) | (2.657) | (2.563) | (2.638) | (2.638) | (2.909) | (2.772) |
|  |  |  |  |  |  |  |  |  |  |  |  |  |  |  |
| Pain Killers | 0.239 | 0.0906 | 0.0913 | 0.0958 | 0.0958 | 0.0901 | 0.109 | 0.292 | 0.0513 | 0.127 | 0.0352 | 0.0352 | -0.0247 | 0.126 |
|  | (0.598) | (0.588) | (0.591) | (0.595) | (0.595) | (0.593) | (0.595) | (0.586) | (0.576) | (0.578) | (0.576) | (0.576) | (0.581) | (0.583) |
|  |  |  |  |  |  |  |  |  |  |  |  |  |  |  |
| Marijuana | 1.689* | 1.614* | 1.606* | 1.615* | 1.615* | 1.625* | 1.611* | 1.655* | 1.635* | 1.560* | 1.664* | 1.664* | 1.709* | 1.662* |
|  | (0.738) | (0.745) | (0.747) | (0.747) | (0.747) | (0.744) | (0.748) | (0.732) | (0.732) | (0.749) | (0.747) | (0.747) | (0.736) | (0.746) |
|  |  |  |  |  |  |  |  |  |  |  |  |  |  |  |
| PCP | -5.642*** | -5.053*** | -5.335*** | -4.990*** | -4.990*** | -4.907*** | -5.260*** | -5.299*** | -4.817*** | -4.871*** | -4.851*** | -4.851*** | -4.965*** | -5.283*** |
|  | (1.502) | (1.418) | (1.436) | (1.411) | (1.411) | (1.394) | (1.474) | (1.351) | (1.352) | (1.342) | (1.378) | (1.378) | (1.379) | (1.409) |
|  |  |  |  |  |  |  |  |  |  |  |  |  |  |  |
| Inhalants | -3.053*** | -2.560*** | -2.675*** | -2.601*** | -2.601*** | -2.577*** | -2.711*** | -3.065*** | -2.665*** | -2.655*** | -2.663*** | -2.663*** | -2.606*** | -2.801*** |
|  | (0.675) | (0.675) | (0.635) | (0.648) | (0.648) | (0.639) | (0.632) | (0.644) | (0.696) | (0.602) | (0.653) | (0.653) | (0.669) | (0.625) |
|  |  |  |  |  |  |  |  |  |  |  |  |  |  |  |
| Tobacco | 0.114 | 0.0360 | 0.0149 | 0.0257 | 0.0257 | 0.0258 | 0.0172 | 0.292 | 0.193 | 0.173 | 0.198 | 0.198 | 0.194 | 0.201 |
|  | (0.707) | (0.705) | (0.707) | (0.707) | (0.707) | (0.706) | (0.707) | (0.728) | (0.724) | (0.721) | (0.715) | (0.715) | (0.711) | (0.718) |
|  |  |  |  |  |  |  |  |  |  |  |  |  |  |  |
| Age of 1st Alcohol Use | 0.223 | 0.191 | 0.190 | 0.204 | 0.204 | 0.211 | 0.194 | 0.228 | 0.206 | 0.203 | 0.223 | 0.223 | 0.219 | 0.224 |
|  | (0.409) | (0.408) | (0.411) | (0.406) | (0.406) | (0.405) | (0.408) | (0.417) | (0.413) | (0.419) | (0.409) | (0.409) | (0.406) | (0.411) |
|  |  |  |  |  |  |  |  |  |  |  |  |  |  |  |
| Risky Behaviors | 0.696* | 0.729* | 0.734* | 0.734* | 0.734* | 0.736* | 0.731* | 0.695* | 0.709* | 0.754* | 0.715* | 0.715* | 0.703* | 0.725* |
|  | (0.342) | (0.343) | (0.343) | (0.342) | (0.342) | (0.343) | (0.342) | (0.337) | (0.342) | (0.346) | (0.340) | (0.340) | (0.343) | (0.342) |
|  |  |  |  |  |  |  |  |  |  |  |  |  |  |  |
| c2009 | 0.377 | 0.0391 | 0.0509 | 0.0358 | 0.0358 | 0.0295 | 0.00419 | 0.221 | 0.0793 | 0.00978 | 0.0292 | 0.0292 | 0.00118 | -0.0852 |
|  | (1.993) | (1.971) | (1.968) | (1.954) | (1.954) | (1.940) | (1.975) | (1.977) | (1.970) | (1.952) | (1.931) | (1.931) | (1.924) | (1.968) |
|  |  |  |  |  |  |  |  |  |  |  |  |  |  |  |
| 2010 | 0.104 | 0.229 | 0.246 | 0.260 | 0.260 | 0.240 | 0.183 | -0.0186 | 0.0936 | 0.206 | 0.0185 | 0.0185 | -0.0261 | -0.0575 |
|  | (1.509) | (1.482) | (1.502) | (1.485) | (1.485) | (1.480) | (1.506) | (1.548) | (1.532) | (1.526) | (1.506) | (1.506) | (1.512) | (1.529) |
|  |  |  |  |  |  |  |  |  |  |  |  |  |  |  |
| 2011 | 2.426 | 2.645 | 2.617 | 2.650 | 2.650 | 2.705 | 2.554 | 2.045 | 2.328 | 2.348 | 2.341 | 2.341 | 2.457 | 2.176 |
|  | (2.003) | (1.986) | (1.966) | (1.964) | (1.964) | (1.970) | (1.998) | (2.018) | (1.975) | (1.964) | (1.943) | (1.943) | (1.939) | (2.003) |
|  |  |  |  |  |  |  |  |  |  |  |  |  |  |  |
| 2012 | 1.260 | 1.205 | 1.240 | 1.132 | 1.132 | 1.092 | 1.159 | 1.065 | 1.182 | 1.139 | 1.079 | 1.079 | 1.036 | 0.958 |
|  | (1.345) | (1.355) | (1.344) | (1.343) | (1.343) | (1.337) | (1.340) | (1.324) | (1.344) | (1.313) | (1.318) | (1.318) | (1.313) | (1.319) |
|  |  |  |  |  |  |  |  |  |  |  |  |  |  |  |
| 2013 | -0.665 | -0.732 | -0.834 | -0.736 | -0.736 | -0.719 | -0.874 | -0.802 | -0.880 | -0.810 | -0.947 | -0.947 | -0.936 | -1.098 |
|  | (1.430) | (1.447) | (1.426) | (1.441) | (1.441) | (1.444) | (1.445) | (1.491) | (1.476) | (1.463) | (1.447) | (1.447) | (1.438) | (1.465) |
|  |  |  |  |  |  |  |  |  |  |  |  |  |  |  |
| 2014 | 0.908 | 1.013 | 0.975 | 0.986 | 0.986 | 0.879 | 0.917 | 0.947 | 1.007 | 1.162 | 0.930 | 0.930 | 0.749 | 0.866 |
|  | (1.530) | (1.531) | (1.526) | (1.526) | (1.526) | (1.511) | (1.533) | (1.520) | (1.525) | (1.536) | (1.495) | (1.495) | (1.498) | (1.518) |
|  |  |  |  |  |  |  |  |  |  |  |  |  |  |  |
| 2015 | 1.419 | 1.416 | 1.487 | 1.387 | 1.387 | 1.359 | 1.382 | 1.176 | 1.359 | 1.334 | 1.289 | 1.289 | 1.279 | 1.107 |
|  | (1.508) | (1.506) | (1.501) | (1.515) | (1.515) | (1.509) | (1.512) | (1.527) | (1.482) | (1.499) | (1.482) | (1.482) | (1.474) | (1.518) |
|  |  |  |  |  |  |  |  |  |  |  |  |  |  |  |
| 2016 | 0.579 | 0.537 | 0.473 | 0.379 | 0.379 | 0.393 | 0.372 | 0.421 | 0.425 | 0.511 | 0.252 | 0.252 | 0.278 | 0.223 |
|  | (1.387) | (1.427) | (1.378) | (1.386) | (1.386) | (1.386) | (1.389) | (1.387) | (1.427) | (1.362) | (1.365) | (1.365) | (1.361) | (1.382) |
|  |  |  |  |  |  |  |  |  |  |  |  |  |  |  |
| 2017 | 2.001 | 2.185 | 2.195 | 2.213 | 2.213 | 2.233 | 2.129 | 1.958 | 2.230 | 2.246 | 2.230 | 2.230 | 2.250 | 2.054 |
|  | (1.424) | (1.442) | (1.446) | (1.441) | (1.441) | (1.445) | (1.441) | (1.423) | (1.436) | (1.447) | (1.427) | (1.427) | (1.431) | (1.435) |
|  |  |  |  |  |  |  |  |  |  |  |  |  |  |  |
| 2018 | 2.449† | 2.212 | 2.129 | 2.102 | 2.102 | 2.058 | 2.096 | 2.397† | 2.185 | 2.170 | 2.077 | 2.077 | 2.078 | 2.100 |
|  | (1.407) | (1.379) | (1.378) | (1.412) | (1.412) | (1.411) | (1.397) | (1.349) | (1.334) | (1.320) | (1.378) | (1.378) | (1.376) | (1.360) |
|  |  |  |  |  |  |  |  |  |  |  |  |  |  |  |
| 2019 | -0.478 | -0.562 | -0.547 | -0.539 | -0.539 | -0.546 | -0.629 | -0.673 | -0.615 | -0.601 | -0.604 | -0.604 | -0.597 | -0.855 |
|  | (1.421) | (1.438) | (1.452) | (1.446) | (1.446) | (1.449) | (1.453) | (1.422) | (1.427) | (1.431) | (1.429) | (1.429) | (1.429) | (1.449) |
|  |  |  |  |  |  |  |  |  |  |  |  |  |  |  |
| MDMA | 0.141 | 0.555 | 0.0636 | 0.140 | 0.140 | 0.0598 | 0.0962 | -0.137 | -0.908 | -0.144 | 0.145 | 0.145 | 0.113 | 0.0619 |
|  | (0.832) | (0.987) | (0.733) | (0.730) | (0.730) | (0.744) | (0.744) | (0.800) | (2.467) | (0.740) | (0.727) | (0.727) | (0.752) | (0.759) |
|  |  |  |  |  |  |  |  |  |  |  |  |  |  |  |
| LCPU | -0.504 |  |  |  |  |  |  | -4.136 |  |  |  |  |  |  |
|  | (1.148) |  |  |  |  |  |  | (2.570) |  |  |  |  |  |  |
|  |  |  |  |  |  |  |  |  |  |  |  |  |  |  |
| Priv Hlth Ins | 0.921 | 0.738 | 0.769 | 0.734 | 0.734 | 0.725 | 0.735 | 0.798 | 0.607 | 0.664 | 0.619 | 0.619 | 0.604 | 0.641 |
|  | (0.745) | (0.771) | (0.758) | (0.770) | (0.770) | (0.770) | (0.764) | (0.733) | (0.756) | (0.744) | (0.750) | (0.750) | (0.758) | (0.740) |
|  |  |  |  |  |  |  |  |  |  |  |  |  |  |  |
| Pub Hlth Ins | 1.352 | 1.342 | 1.365† | 1.155 | 1.155 | 1.071 | 1.323 | 3.314* | 3.633* | 3.009† | 3.723* | 3.723* | 3.676* | 3.474* |
|  | (0.844) | (0.840) | (0.790) | (0.793) | (0.793) | (0.795) | (0.843) | (1.649) | (1.741) | (1.675) | (1.587) | (1.587) | (1.556) | (1.600) |
|  |  |  |  |  |  |  |  |  |  |  |  |  |  |  |
| Oth Hlth Ins | -1.731 | -1.920 | -1.882 | -1.909 | -1.909 | -1.906 | -1.897 | -1.741 | -1.917 | -1.899 | -1.863 | -1.863 | -1.847 | -1.849 |
|  | (2.328) | (2.349) | (2.344) | (2.342) | (2.342) | (2.337) | (2.343) | (2.337) | (2.363) | (2.369) | (2.351) | (2.351) | (2.350) | (2.351) |
|  |  |  |  |  |  |  |  |  |  |  |  |  |  |  |
| LCPU * Pub Hlth Ins | -2.712 |  |  |  |  |  |  | 10.12* |  |  |  |  |  |  |
|  | (1.946) |  |  |  |  |  |  | (4.617) |  |  |  |  |  |  |
|  |  |  |  |  |  |  |  |  |  |  |  |  |  |  |
| Psilocybin |  | 1.940† | 2.514* | 2.118* | 2.118* | 2.130* | 2.085* |  | 1.574 | -1.568 | 1.897† | 1.897† | 1.900† | 1.759† |
|  |  | (1.043) | (1.029) | (1.004) | (1.004) | (1.013) | (1.002) |  | (1.003) | (2.535) | (0.972) | (0.972) | (0.999) | (1.017) |
|  |  |  |  |  |  |  |  |  |  |  |  |  |  |  |
| Peyote/Mescaline |  | -5.070** | -5.205** | -5.141** | -5.141** | -6.175** | -5.302** |  | -5.111** | -5.268** | -5.127** | -5.127** | -3.736 | -5.365** |
|  |  | (1.763) | (1.727) | (1.708) | (1.708) | (1.869) | (1.698) |  | (1.746) | (1.648) | (1.690) | (1.690) | (4.646) | (1.687) |
|  |  |  |  |  |  |  |  |  |  |  |  |  |  |  |
| LSD |  | -3.088** | -2.986** | -3.219** | -3.219** | -3.216** | -2.720* |  | -2.927* | -2.639* | -3.084** | -3.084** | -3.010** | -3.223 |
|  |  | (1.156) | (1.109) | (1.093) | (1.093) | (1.091) | (1.215) |  | (1.147) | (1.072) | (1.078) | (1.078) | (1.093) | (2.783) |
|  |  |  |  |  |  |  |  |  |  |  |  |  |  |  |
| MDMA * Pub Hlth Ins |  | -1.524 |  |  |  |  |  |  | 1.009 |  |  |  |  |  |
|  |  | (1.802) |  |  |  |  |  |  | (5.106) |  |  |  |  |  |
|  |  |  |  |  |  |  |  |  |  |  |  |  |  |  |
| Psilocybin * Pub Hlth Ins |  |  | -2.598 |  |  |  |  |  |  | 13.90** |  |  |  |  |
|  |  |  | (2.338) |  |  |  |  |  |  | (5.106) |  |  |  |  |
|  |  |  |  |  |  |  |  |  |  |  |  |  |  |  |
| Peyote/Mescaline * Pub Hlth Ins |  |  |  |  |  | 6.509* |  |  |  |  |  |  | 22.73** |  |
|  |  |  |  |  |  | (2.287) |  |  |  |  |  |  | (8.192) |  |
|  |  |  |  |  |  |  |  |  |  |  |  |  |  |  |
| LSD * Pub Hlth Ins |  |  |  |  |  |  | -1.682 |  |  |  |  |  |  | 7.825 |
|  |  |  |  |  |  |  | (2.092) |  |  |  |  |  |  | (4.746) |
|  |  |  |  |  |  |  |  |  |  |  |  |  |  |  |
| LCPU * Education |  |  |  |  |  |  |  | 1.196 |  |  |  |  |  |  |
|  |  |  |  |  |  |  |  | (0.943) |  |  |  |  |  |  |
|  |  |  |  |  |  |  |  |  |  |  |  |  |  |  |
| Pub Hlth Ins * Education |  |  |  |  |  |  |  | -0.834 | -0.953† | -0.712 | -1.050† | -1.050† | -1.058* | -0.882† |
|  |  |  |  |  |  |  |  | (0.559) | (0.557) | (0.567) | (0.528) | (0.528) | (0.526) | (0.524) |
|  |  |  |  |  |  |  |  |  |  |  |  |  |  |  |
| LCPU * Pub Hlth Ins * Education |  |  |  |  |  |  |  | -4.816* |  |  |  |  |  |  |
|  |  |  |  |  |  |  |  | (2.027) |  |  |  |  |  |  |
|  |  |  |  |  |  |  |  |  |  |  |  |  |  |  |
| MDMA * Education |  |  |  |  |  |  |  |  | 0.530 |  |  |  |  |  |
|  |  |  |  |  |  |  |  |  | (0.864) |  |  |  |  |  |
|  |  |  |  |  |  |  |  |  |  |  |  |  |  |  |
| MDMA * Pub Hlth Ins * Education |  |  |  |  |  |  |  |  | -0.948 |  |  |  |  |  |
|  |  |  |  |  |  |  |  |  | (2.167) |  |  |  |  |  |
|  |  |  |  |  |  |  |  |  |  |  |  |  |  |  |
| Psilocybin * Education |  |  |  |  |  |  |  |  |  | 1.241 |  |  |  |  |
|  |  |  |  |  |  |  |  |  |  | (0.850) |  |  |  |  |
|  |  |  |  |  |  |  |  |  |  |  |  |  |  |  |
| Psilocybin * Pub Hlth Ins * Education |  |  |  |  |  |  |  |  |  | -6.390** |  |  |  |  |
|  |  |  |  |  |  |  |  |  |  | (2.364) |  |  |  |  |
|  |  |  |  |  |  |  |  |  |  |  |  |  |  |  |
| Peyote/Mescaline * Education |  |  |  |  |  |  |  |  |  |  |  |  | -0.834 |  |
|  |  |  |  |  |  |  |  |  |  |  |  |  | (1.452) |  |
|  |  |  |  |  |  |  |  |  |  |  |  |  |  |  |
| Peyote/Mescaline * Pub Hlth Ins * Education |  |  |  |  |  |  |  |  |  |  |  |  | -6.460* |  |
|  |  |  |  |  |  |  |  |  |  |  |  |  | (3.024) |  |
|  |  |  |  |  |  |  |  |  |  |  |  |  |  |  |
| LSD * Education |  |  |  |  |  |  |  |  |  |  |  |  |  | 0.267 |
|  |  |  |  |  |  |  |  |  |  |  |  |  |  | (0.985) |
|  |  |  |  |  |  |  |  |  |  |  |  |  |  |  |
| LSD * Pub Hlth Ins * Education |  |  |  |  |  |  |  |  |  |  |  |  |  | -3.700* |
|  |  |  |  |  |  |  |  |  |  |  |  |  |  | (1.058) |
|  |  |  |  |  |  |  |  |  |  |  |  |  |  |  |
| Constant | 8.920** | 9.260** | 9.293** | 9.178** | 9.178** | 9.132** | 9.221** | 8.628* | 8.663* | 9.038** | 8.526* | 8.526* | 8.532* | 8.674* |
|  | (3.367) | (3.331) | (3.323) | (3.291) | (3.291) | (3.276) | (3.314) | (3.428) | (3.360) | (3.417) | (3.309) | (3.309) | (3.297) | (3.350) |
| Observations | 630 | 630 | 630 | 630 | 630 | 630 | 630 | 630 | 630 | 630 | 630 | 630 | 630 | 630 |
| *R*2 | 0.222 | 0.242 | 0.243 | 0.240 | 0.240 | 0.243 | 0.242 | 0.233 | 0.247 | 0.255 | 0.245 | 0.245 | 0.249 | 0.249 |

Standard errors in parentheses

Source: 2008-2019 National Survey of Drug Use and Health, n=484,732

aMen serve as the references category for Women

bSingle Serves as the reference category for Marital Statuses

c2008 serves as the reference category for the year survey was taken

† *p* < .10, * *p* < .05, ** *p* < .01, *** *p* < .001

Supplemental Table 20. Weighted Multivariate Ordinary Least Square Regression Predicting Psychological Distress Among NI/AN with Private Health Insurance Interaction Terms

|  | Model 1 | Model 2 | Model 3 | Model 4 | Model 5 | Model 6 | Model 7 | Model 8 | Model 9 | Model 10 | Model 11 | Model 12 | Model 13 | Model 14 |
| --- | --- | --- | --- | --- | --- | --- | --- | --- | --- | --- | --- | --- | --- | --- |
| Age | -0.568*** | -0.534*** | -0.539*** | -0.538*** | -0.538*** | -0.541*** | -0.540*** | -0.557*** | -0.529*** | -0.534*** | -0.530*** | -0.530*** | -0.536*** | -0.530*** |
|  | (0.123) | (0.128) | (0.128) | (0.128) | (0.128) | (0.129) | (0.128) | (0.122) | (0.125) | (0.127) | (0.126) | (0.126) | (0.128) | (0.124) |
|  |  |  |  |  |  |  |  |  |  |  |  |  |  |  |
| Education | -0.627* | -0.618* | -0.626* | -0.629* | -0.629* | -0.628* | -0.630* | -0.971** | -1.113** | -0.890** | -0.902** | -0.902** | -0.746* | -1.056** |
|  | (0.286) | (0.285) | (0.286) | (0.287) | (0.287) | (0.288) | (0.287) | (0.353) | (0.330) | (0.330) | (0.320) | (0.320) | (0.346) | (0.331) |
|  |  |  |  |  |  |  |  |  |  |  |  |  |  |  |
| Family Income | -0.377** | -0.373*** | -0.369** | -0.364** | -0.364** | -0.371** | -0.364** | -0.368** | -0.378*** | -0.362** | -0.355** | -0.355** | -0.347** | -0.349** |
|  | (0.113) | (0.109) | (0.110) | (0.110) | (0.110) | (0.111) | (0.110) | (0.111) | (0.104) | (0.107) | (0.109) | (0.109) | (0.111) | (0.109) |
|  |  |  |  |  |  |  |  |  |  |  |  |  |  |  |
| aWomen | 0.923† | 0.924† | 0.917† | 0.916† | 0.916† | 0.947† | 0.894† | 0.883† | 0.762 | 0.870 | 0.878 | 0.878 | 0.871† | 0.843 |
|  | (0.529) | (0.536) | (0.536) | (0.536) | (0.536) | (0.525) | (0.535) | (0.529) | (0.512) | (0.530) | (0.534) | (0.534) | (0.517) | (0.528) |
|  |  |  |  |  |  |  |  |  |  |  |  |  |  |  |
| bMarried | 0.481 | 0.495 | 0.495 | 0.468 | 0.468 | 0.442 | 0.508 | 0.400 | 0.443 | 0.423 | 0.396 | 0.396 | 0.331 | 0.403 |
|  | (0.578) | (0.582) | (0.578) | (0.582) | (0.582) | (0.586) | (0.581) | (0.579) | (0.577) | (0.579) | (0.584) | (0.584) | (0.590) | (0.583) |
|  |  |  |  |  |  |  |  |  |  |  |  |  |  |  |
| Widowed | -1.005 | -1.177 | -1.168 | -1.155 | -1.155 | -1.204 | -1.138 | -0.994 | -1.086 | -1.136 | -1.140 | -1.140 | -1.230 | -1.171 |
|  | (1.013) | (0.992) | (0.993) | (0.994) | (0.994) | (0.999) | (0.993) | (1.008) | (0.961) | (0.986) | (0.984) | (0.984) | (0.994) | (0.979) |
|  |  |  |  |  |  |  |  |  |  |  |  |  |  |  |
| Divorced | 2.251** | 2.192** | 2.188** | 2.184** | 2.184** | 2.111** | 2.193** | 2.219** | 2.205** | 2.175** | 2.160** | 2.160** | 2.036** | 2.137** |
|  | (0.738) | (0.754) | (0.753) | (0.756) | (0.756) | (0.759) | (0.749) | (0.734) | (0.735) | (0.744) | (0.752) | (0.752) | (0.752) | (0.735) |
|  |  |  |  |  |  |  |  |  |  |  |  |  |  |  |
| Religious Salience | -0.0925 | -0.126 | -0.128 | -0.125 | -0.125 | -0.115 | -0.121 | -0.0972 | -0.106 | -0.128 | -0.129 | -0.129 | -0.115 | -0.122 |
|  | (0.106) | (0.104) | (0.105) | (0.104) | (0.104) | (0.103) | (0.105) | (0.105) | (0.103) | (0.104) | (0.103) | (0.103) | (0.0992) | (0.103) |
|  |  |  |  |  |  |  |  |  |  |  |  |  |  |  |
| Religious Attendance | 0.127 | 0.137 | 0.138 | 0.135 | 0.135 | 0.137 | 0.133 | 0.140 | 0.140 | 0.151 | 0.146 | 0.146 | 0.157 | 0.143 |
|  | (0.155) | (0.153) | (0.153) | (0.154) | (0.154) | (0.154) | (0.153) | (0.152) | (0.149) | (0.151) | (0.150) | (0.150) | (0.151) | (0.151) |
|  |  |  |  |  |  |  |  |  |  |  |  |  |  |  |
| Cocaine | 0.601 | 0.572 | 0.578 | 0.576 | 0.576 | 0.574 | 0.545 | 0.593 | 0.634 | 0.579 | 0.555 | 0.555 | 0.480 | 0.571 |
|  | (0.576) | (0.585) | (0.587) | (0.590) | (0.590) | (0.585) | (0.591) | (0.572) | (0.576) | (0.585) | (0.586) | (0.586) | (0.597) | (0.577) |
|  |  |  |  |  |  |  |  |  |  |  |  |  |  |  |
| Stimulant | 0.631 | 0.762 | 0.771 | 0.792 | 0.792 | 0.816 | 0.804 | 0.677 | 1.044 | 0.779 | 0.828 | 0.828 | 0.865 | 0.891 |
|  | (0.693) | (0.686) | (0.685) | (0.687) | (0.687) | (0.678) | (0.676) | (0.662) | (0.667) | (0.665) | (0.663) | (0.663) | (0.654) | (0.648) |
|  |  |  |  |  |  |  |  |  |  |  |  |  |  |  |
| Sedative | 0.805 | 0.588 | 0.647 | 0.655 | 0.655 | 0.658 | 0.653 | 0.826 | 0.692 | 0.706 | 0.678 | 0.678 | 0.719 | 0.680 |
|  | (0.716) | (0.717) | (0.715) | (0.710) | (0.710) | (0.709) | (0.712) | (0.703) | (0.690) | (0.726) | (0.704) | (0.704) | (0.704) | (0.698) |
|  |  |  |  |  |  |  |  |  |  |  |  |  |  |  |
| Tranquilizer | 0.490 | 0.627 | 0.608 | 0.602 | 0.602 | 0.640 | 0.610 | 0.492 | 0.562 | 0.629 | 0.599 | 0.599 | 0.617 | 0.636 |
|  | (0.550) | (0.545) | (0.548) | (0.549) | (0.549) | (0.547) | (0.546) | (0.552) | (0.518) | (0.553) | (0.555) | (0.555) | (0.543) | (0.550) |
|  |  |  |  |  |  |  |  |  |  |  |  |  |  |  |
| Heroine | 0.374 | 0.262 | 0.231 | 0.330 | 0.330 | 0.166 | 0.176 | 0.363 | 0.0669 | 0.232 | 0.356 | 0.356 | 0.261 | 0.242 |
|  | (1.012) | (1.004) | (1.008) | (1.005) | (1.005) | (1.010) | (1.007) | (1.012) | (0.960) | (0.983) | (0.998) | (0.998) | (0.972) | (1.016) |
|  |  |  |  |  |  |  |  |  |  |  |  |  |  |  |
| Pain Killers | 0.134 | 0.149 | 0.131 | 0.131 | 0.131 | 0.145 | 0.112 | 0.0956 | 0.0963 | 0.0949 | 0.0986 | 0.0986 | 0.123 | 0.0790 |
|  | (0.545) | (0.541) | (0.540) | (0.539) | (0.539) | (0.533) | (0.540) | (0.548) | (0.553) | (0.545) | (0.542) | (0.542) | (0.536) | (0.538) |
|  |  |  |  |  |  |  |  |  |  |  |  |  |  |  |
| Marijuana | -0.663 | -0.617 | -0.634 | -0.636 | -0.636 | -0.715 | -0.614 | -0.703 | -0.683 | -0.669 | -0.664 | -0.664 | -0.740 | -0.653 |
|  | (0.592) | (0.596) | (0.598) | (0.599) | (0.599) | (0.599) | (0.593) | (0.583) | (0.580) | (0.588) | (0.591) | (0.591) | (0.590) | (0.581) |
|  |  |  |  |  |  |  |  |  |  |  |  |  |  |  |
| PCP | 0.218 | 0.936 | 0.898 | 0.893 | 0.893 | 1.248 | 1.070 | 0.287 | 0.830 | 0.864 | 0.943 | 0.943 | 1.464 | 1.091 |
|  | (0.973) | (1.020) | (1.005) | (1.005) | (1.005) | (0.976) | (1.017) | (0.947) | (0.974) | (0.989) | (0.989) | (0.989) | (0.962) | (1.005) |
|  |  |  |  |  |  |  |  |  |  |  |  |  |  |  |
| Inhalants | -0.0253 | 0.00651 | 0.00617 | 0.0137 | 0.0137 | -0.0113 | -0.00352 | -0.0331 | -0.0990 | 0.00647 | 0.00807 | 0.00807 | 0.00969 | -0.0591 |
|  | (0.597) | (0.607) | (0.605) | (0.607) | (0.607) | (0.605) | (0.603) | (0.596) | (0.616) | (0.607) | (0.610) | (0.610) | (0.603) | (0.597) |
|  |  |  |  |  |  |  |  |  |  |  |  |  |  |  |
| Tobacco | 0.811 | 0.865 | 0.865 | 0.868 | 0.868 | 0.878 | 0.873 | 0.830 | 0.872 | 0.881 | 0.879 | 0.879 | 0.868 | 0.872 |
|  | (0.532) | (0.530) | (0.531) | (0.534) | (0.534) | (0.534) | (0.529) | (0.540) | (0.534) | (0.540) | (0.539) | (0.539) | (0.543) | (0.533) |
|  |  |  |  |  |  |  |  |  |  |  |  |  |  |  |
| Age of 1st Alcohol Use | 0.0351 | 0.0482 | 0.0443 | 0.0368 | 0.0368 | 0.0501 | 0.0445 | 0.0130 | -0.00442 | 0.0203 | 0.0166 | 0.0166 | 0.0377 | 0.0236 |
|  | (0.283) | (0.284) | (0.286) | (0.287) | (0.287) | (0.286) | (0.284) | (0.280) | (0.282) | (0.283) | (0.284) | (0.284) | (0.283) | (0.280) |
|  |  |  |  |  |  |  |  |  |  |  |  |  |  |  |
| Risky Behaviors | 1.132*** | 1.200*** | 1.185*** | 1.190*** | 1.190*** | 1.224*** | 1.175*** | 1.121*** | 1.167*** | 1.170*** | 1.178*** | 1.178*** | 1.192*** | 1.159*** |
|  | (0.285) | (0.282) | (0.281) | (0.280) | (0.280) | (0.275) | (0.279) | (0.283) | (0.280) | (0.278) | (0.279) | (0.279) | (0.272) | (0.279) |
|  |  |  |  |  |  |  |  |  |  |  |  |  |  |  |
| c2009 | 2.122* | 2.070* | 2.098* | 2.125* | 2.125* | 2.322** | 2.138* | 1.908* | 1.769* | 1.871* | 1.946* | 1.946* | 2.215* | 1.867* |
|  | (0.867) | (0.894) | (0.883) | (0.882) | (0.882) | (0.879) | (0.871) | (0.831) | (0.864) | (0.853) | (0.861) | (0.861) | (0.860) | (0.854) |
|  |  |  |  |  |  |  |  |  |  |  |  |  |  |  |
| 2010 | 2.666* | 2.876* | 2.843* | 2.870* | 2.870* | 2.856* | 2.869* | 2.487* | 2.778* | 2.711* | 2.714* | 2.714* | 2.707* | 2.694* |
|  | (1.282) | (1.302) | (1.305) | (1.310) | (1.310) | (1.290) | (1.294) | (1.226) | (1.269) | (1.262) | (1.280) | (1.280) | (1.265) | (1.242) |
|  |  |  |  |  |  |  |  |  |  |  |  |  |  |  |
| 2011 | 4.907** | 4.995** | 5.003** | 5.052** | 5.052** | 4.955** | 4.972** | 4.649** | 4.760** | 4.761** | 4.850** | 4.850** | 4.772** | 4.742** |
|  | (1.487) | (1.506) | (1.501) | (1.518) | (1.518) | (1.473) | (1.491) | (1.431) | (1.452) | (1.446) | (1.467) | (1.467) | (1.420) | (1.421) |
|  |  |  |  |  |  |  |  |  |  |  |  |  |  |  |
| 2012 | 2.907** | 2.956** | 2.997** | 2.984** | 2.984** | 2.941** | 2.984** | 2.734*** | 2.668** | 2.879*** | 2.854** | 2.854** | 2.885*** | 2.758** |
|  | (0.868) | (0.906) | (0.898) | (0.905) | (0.905) | (0.888) | (0.894) | (0.798) | (0.836) | (0.845) | (0.869) | (0.869) | (0.848) | (0.836) |
|  |  |  |  |  |  |  |  |  |  |  |  |  |  |  |
| 2013 | 2.849* | 2.749* | 2.763* | 2.788* | 2.788* | 2.843* | 2.765* | 2.595* | 2.469* | 2.531* | 2.587* | 2.587* | 2.761* | 2.524* |
|  | (1.156) | (1.218) | (1.211) | (1.216) | (1.216) | (1.146) | (1.203) | (1.089) | (1.181) | (1.164) | (1.178) | (1.178) | (1.102) | (1.159) |
|  |  |  |  |  |  |  |  |  |  |  |  |  |  |  |
| 2014 | 1.419 | 1.324 | 1.355 | 1.312 | 1.312 | 1.436 | 1.319 | 1.189 | 0.923 | 1.165 | 1.120 | 1.120 | 1.276 | 1.045 |
|  | (1.094) | (1.108) | (1.104) | (1.120) | (1.120) | (1.093) | (1.100) | (1.007) | (1.030) | (1.038) | (1.067) | (1.067) | (1.027) | (1.029) |
|  |  |  |  |  |  |  |  |  |  |  |  |  |  |  |
| 2015 | 1.560† | 1.576 | 1.565 | 1.591 | 1.591 | 1.567† | 1.587 | 1.363 | 1.310 | 1.360 | 1.439 | 1.439 | 1.433 | 1.350 |
|  | (0.936) | (0.966) | (0.968) | (0.972) | (0.972) | (0.937) | (0.957) | (0.885) | (0.926) | (0.931) | (0.944) | (0.944) | (0.911) | (0.918) |
|  |  |  |  |  |  |  |  |  |  |  |  |  |  |  |
| 2016 | 2.161* | 2.314* | 2.315* | 2.336* | 2.336* | 2.297* | 2.311* | 1.923* | 2.054* | 2.111* | 2.149* | 2.149* | 2.148* | 2.022* |
|  | (0.911) | (0.945) | (0.943) | (0.945) | (0.945) | (0.922) | (0.931) | (0.872) | (0.931) | (0.915) | (0.932) | (0.932) | (0.896) | (0.911) |
|  |  |  |  |  |  |  |  |  |  |  |  |  |  |  |
| 2017 | 2.814* | 2.939* | 2.914* | 2.935* | 2.935* | 2.961* | 2.926* | 2.593* | 2.709* | 2.687* | 2.755* | 2.755* | 2.797* | 2.707* |
|  | (1.147) | (1.200) | (1.204) | (1.201) | (1.201) | (1.189) | (1.186) | (1.160) | (1.208) | (1.213) | (1.214) | (1.214) | (1.207) | (1.208) |
|  |  |  |  |  |  |  |  |  |  |  |  |  |  |  |
| 2018 | 3.008** | 3.057** | 3.066** | 3.111** | 3.111** | 3.110** | 3.101** | 2.755** | 2.769* | 2.836** | 2.907** | 2.907** | 2.957** | 2.836** |
|  | (1.103) | (1.145) | (1.142) | (1.140) | (1.140) | (1.119) | (1.128) | (1.027) | (1.082) | (1.072) | (1.091) | (1.091) | (1.067) | (1.063) |
|  |  |  |  |  |  |  |  |  |  |  |  |  |  |  |
| 2019 | 3.590** | 3.485** | 3.430** | 3.470** | 3.470** | 3.470** | 3.464** | 3.389** | 3.307** | 3.243* | 3.315** | 3.315** | 3.346** | 3.238** |
|  | (1.194) | (1.240) | (1.243) | (1.248) | (1.248) | (1.213) | (1.233) | (1.194) | (1.256) | (1.247) | (1.254) | (1.254) | (1.202) | (1.233) |
|  |  |  |  |  |  |  |  |  |  |  |  |  |  |  |
| MDMA | 2.487** | 2.850** | 2.450** | 2.419** | 2.419** | 2.437** | 2.473** | 2.436** | -0.899 | 2.363** | 2.362** | 2.362** | 2.340** | 2.343** |
|  | (0.826) | (0.875) | (0.799) | (0.811) | (0.811) | (0.808) | (0.797) | (0.818) | (2.251) | (0.733) | (0.810) | (0.810) | (0.785) | (0.781) |
|  |  |  |  |  |  |  |  |  |  |  |  |  |  |  |
| LCPU | 0.0597 |  |  |  |  |  |  | -0.0997 |  |  |  |  |  |  |
|  | (0.611) |  |  |  |  |  |  | (1.768) |  |  |  |  |  |  |
|  |  |  |  |  |  |  |  |  |  |  |  |  |  |  |
| Priv Hlth Ins | 0.356 | 0.0814 | 0.0566 | -0.0717 | -0.0717 | 0.351 | 0.0932 | -2.041 | -3.290* | -2.269 | -2.035 | -2.035 | -1.011 | -2.334 |
|  | (0.631) | (0.568) | (0.571) | (0.557) | (0.557) | (0.608) | (0.578) | (1.699) | (1.466) | (1.513) | (1.404) | (1.404) | (1.528) | (1.636) |
|  |  |  |  |  |  |  |  |  |  |  |  |  |  |  |
| Pub Hlth Ins | 0.854 | 0.909 | 0.916 | 0.922 | 0.922 | 0.877 | 0.909 | 0.874 | 0.948 | 0.936 | 0.943 | 0.943 | 0.921 | 0.928 |
|  | (0.629) | (0.637) | (0.637) | (0.639) | (0.639) | (0.630) | (0.636) | (0.623) | (0.633) | (0.637) | (0.639) | (0.639) | (0.633) | (0.630) |
|  |  |  |  |  |  |  |  |  |  |  |  |  |  |  |
| Oth Hlth Ins | 0.650 | 0.710 | 0.699 | 0.710 | 0.710 | 0.733 | 0.698 | 0.661 | 0.700 | 0.702 | 0.716 | 0.716 | 0.758 | 0.718 |
|  | (0.784) | (0.791) | (0.792) | (0.788) | (0.788) | (0.789) | (0.789) | (0.774) | (0.781) | (0.782) | (0.779) | (0.779) | (0.787) | (0.778) |
|  |  |  |  |  |  |  |  |  |  |  |  |  |  |  |
| LCPU * Priv Hlth Ins | -1.736† |  |  |  |  |  |  | -1.338 |  |  |  |  |  |  |
|  | (0.989) |  |  |  |  |  |  | (2.904) |  |  |  |  |  |  |
|  |  |  |  |  |  |  |  |  |  |  |  |  |  |  |
| Psilocybin |  | 1.106 | 1.365 | 1.074 | 1.074 | 1.027 | 1.131 |  | 1.268† | 1.589 | 1.068 | 1.068 | 0.937 | 1.102 |
|  |  | (0.703) | (0.862) | (0.711) | (0.711) | (0.708) | (0.703) |  | (0.689) | (2.181) | (0.708) | (0.708) | (0.697) | (0.687) |
|  |  |  |  |  |  |  |  |  |  |  |  |  |  |  |
| DMT |  | -2.216 | -2.953 | -3.033 | -3.033 | -3.480† | -2.977 |  | -1.762 | -3.009 | -3.142 | -3.142 | -3.616† | -3.058 |
|  |  | (2.085) | (2.252) | (2.082) | (2.082) | (2.015) | (2.276) |  | (2.198) | (2.291) | (2.071) | (2.071) | (1.972) | (2.255) |
|  |  |  |  |  |  |  |  |  |  |  |  |  |  |  |
| Peyote/Mescaline |  | 0.133 | 0.130 | 0.137 | 0.137 | 0.927 | 0.147 |  | 0.108 | 0.110 | 0.133 | 0.133 | 3.534* | 0.119 |
|  |  | (0.587) | (0.586) | (0.586) | (0.586) | (0.624) | (0.587) |  | (0.586) | (0.589) | (0.588) | (0.588) | (1.689) | (0.585) |
|  |  |  |  |  |  |  |  |  |  |  |  |  |  |  |
| LSD |  | -2.313** | -2.291** | -2.349** | -2.349** | -2.285** | -1.994* |  | -2.465*** | -2.229** | -2.320** | -2.320** | -2.091** | -4.265* |
|  |  | (0.721) | (0.741) | (0.740) | (0.740) | (0.718) | (0.940) |  | (0.705) | (0.707) | (0.724) | (0.724) | (0.673) | (2.004) |
|  |  |  |  |  |  |  |  |  |  |  |  |  |  |  |
| MDMA * Priv Hlth Ins |  | -1.320 |  |  |  |  |  |  | 10.01** |  |  |  |  |  |
|  |  | (1.213) |  |  |  |  |  |  | (3.476) |  |  |  |  |  |
|  |  |  |  |  |  |  |  |  |  |  |  |  |  |  |
| Psilocybin * Priv Hlth Ins |  |  | -0.896 |  |  |  |  |  |  | 1.351 |  |  |  |  |
|  |  |  | (1.231) |  |  |  |  |  |  | (3.733) |  |  |  |  |
|  |  |  |  |  |  |  |  |  |  |  |  |  |  |  |
| Peyote/Mescaline * Priv Hlth Ins |  |  |  |  |  | -2.534* |  |  |  |  |  |  | -8.365* |  |
|  |  |  |  |  |  | (1.041) |  |  |  |  |  |  | (3.506) |  |
|  |  |  |  |  |  |  |  |  |  |  |  |  |  |  |
| LSD * Priv Hlth Ins |  |  |  |  |  |  | -1.122 |  |  |  |  |  |  | 1.661 |
|  |  |  |  |  |  |  | (1.239) |  |  |  |  |  |  | (3.362) |
|  |  |  |  |  |  |  |  |  |  |  |  |  |  |  |
| LCPU * Education |  |  |  |  |  |  |  | 0.0898 |  |  |  |  |  |  |
|  |  |  |  |  |  |  |  | (0.699) |  |  |  |  |  |  |
|  |  |  |  |  |  |  |  |  |  |  |  |  |  |  |
| Priv Hlth Ins * Education |  |  |  |  |  |  |  | 0.942 | 1.306* | 0.888 | 0.754 | 0.754 | 0.514 | 0.946 |
|  |  |  |  |  |  |  |  | (0.608) | (0.520) | (0.550) | (0.522) | (0.522) | (0.561) | (0.586) |
|  |  |  |  |  |  |  |  |  |  |  |  |  |  |  |
| LCPU * Priv Hlth Ins * Education |  |  |  |  |  |  |  | -0.211 |  |  |  |  |  |  |
|  |  |  |  |  |  |  |  | (0.987) |  |  |  |  |  |  |
|  |  |  |  |  |  |  |  |  |  |  |  |  |  |  |
| MDMA * Education |  |  |  |  |  |  |  |  | 1.668* |  |  |  |  |  |
|  |  |  |  |  |  |  |  |  | (0.818) |  |  |  |  |  |
|  |  |  |  |  |  |  |  |  |  |  |  |  |  |  |
| MDMA * Priv Hlth Ins * Education |  |  |  |  |  |  |  |  | -4.425*** |  |  |  |  |  |
|  |  |  |  |  |  |  |  |  | (1.233) |  |  |  |  |  |
|  |  |  |  |  |  |  |  |  |  |  |  |  |  |  |
| Psilocybin * Education |  |  |  |  |  |  |  |  |  | -0.0899 |  |  |  |  |
|  |  |  |  |  |  |  |  |  |  | (0.885) |  |  |  |  |
|  |  |  |  |  |  |  |  |  |  |  |  |  |  |  |
| Psilocybin * Priv Hlth Ins * Education |  |  |  |  |  |  |  |  |  | -0.805 |  |  |  |  |
|  |  |  |  |  |  |  |  |  |  | (1.264) |  |  |  |  |
|  |  |  |  |  |  |  |  |  |  |  |  |  |  |  |
| Peyote/Mescaline * Education |  |  |  |  |  |  |  |  |  |  |  |  | -1.046 |  |
|  |  |  |  |  |  |  |  |  |  |  |  |  | (0.664) |  |
|  |  |  |  |  |  |  |  |  |  |  |  |  |  |  |
| Peyote/Mescaline * Priv Hlth Ins * Education |  |  |  |  |  |  |  |  |  |  |  |  | 2.092* |  |
|  |  |  |  |  |  |  |  |  |  |  |  |  | (0.098) |  |
|  |  |  |  |  |  |  |  |  |  |  |  |  |  |  |
| LSD * Education |  |  |  |  |  |  |  |  |  |  |  |  |  | 0.962 |
|  |  |  |  |  |  |  |  |  |  |  |  |  |  | (0.778) |
|  |  |  |  |  |  |  |  |  |  |  |  |  |  |  |
| LSD * Priv Hlth Ins * Education |  |  |  |  |  |  |  |  |  |  |  |  |  | -1.132 |
|  |  |  |  |  |  |  |  |  |  |  |  |  |  | (1.157) |
|  |  |  |  |  |  |  |  |  |  |  |  |  |  |  |
| Constant | 15.32*** | 14.74*** | 14.88*** | 14.90*** | 14.90*** | 14.70*** | 14.86*** | 16.27*** | 16.30*** | 15.72*** | 15.69*** | 15.69*** | 15.09*** | 16.05*** |
|  | (2.090) | (2.102) | (2.115) | (2.125) | (2.125) | (2.121) | (2.100) | (1.920) | (2.011) | (1.994) | (2.111) | (2.111) | (2.056) | (2.018) |
| Observations | 2065 | 2065 | 2065 | 2065 | 2065 | 2065 | 2065 | 2065 | 2065 | 2065 | 2065 | 2065 | 2065 | 2065 |
| *R*2 | 0.204 | 0.211 | 0.210 | 0.210 | 0.210 | 0.215 | 0.211 | 0.207 | 0.222 | 0.214 | 0.212 | 0.212 | 0.220 | 0.215 |

Standard errors in parentheses

Source: 2008-2019 National Survey of Drug Use and Health, n=484,732

aMen serve as the references category for Women

bSingle Serves as the reference category for Marital Statuses

c2008 serves as the reference category for the year survey was taken

† *p* < .10, * *p* < .05, ** *p* < .01, *** *p* < .001

Supplemental Table 21. Weighted Multivariate Ordinary Least Square Regression Predicting Psychological Distress Among NI/AN with Public Health Insurance Interaction Terms

|  | Model 1 | Model 2 | Model 3 | Model 4 | Model 5 | Model 6 | Model 7 | Model 8 | Model 9 | Model 10 | Model 11 | Model 12 | Model 13 | Model 14 |
| --- | --- | --- | --- | --- | --- | --- | --- | --- | --- | --- | --- | --- | --- | --- |
| Age | -0.568*** | -0.536*** | -0.544*** | -0.538*** | -0.538*** | -0.539*** | -0.542*** | -0.565*** | -0.537*** | -0.544*** | -0.538*** | -0.538*** | -0.530*** | -0.541*** |
|  | (0.123) | (0.128) | (0.128) | (0.128) | (0.128) | (0.128) | (0.127) | (0.123) | (0.128) | (0.129) | (0.128) | (0.128) | (0.129) | (0.127) |
|  |  |  |  |  |  |  |  |  |  |  |  |  |  |  |
| Education | -0.642* | -0.637* | -0.615* | -0.629* | -0.629* | -0.631* | -0.633* | -0.713† | -0.703† | -0.665† | -0.708† | -0.708† | -0.703† | -0.758† |
|  | (0.288) | (0.286) | (0.283) | (0.287) | (0.287) | (0.289) | (0.286) | (0.429) | (0.386) | (0.386) | (0.362) | (0.362) | (0.403) | (0.398) |
|  |  |  |  |  |  |  |  |  |  |  |  |  |  |  |
| Family Income | -0.359** | -0.360** | -0.358** | -0.364** | -0.364** | -0.364** | -0.356** | -0.360** | -0.365** | -0.362** | -0.367** | -0.367** | -0.350** | -0.350** |
|  | (0.115) | (0.110) | (0.111) | (0.110) | (0.110) | (0.110) | (0.112) | (0.115) | (0.110) | (0.111) | (0.110) | (0.110) | (0.113) | (0.111) |
|  |  |  |  |  |  |  |  |  |  |  |  |  |  |  |
| aWomen | 0.897† | 0.910† | 0.884† | 0.916† | 0.916† | 0.917† | 0.914† | 0.920† | 0.911† | 0.903† | 0.923† | 0.923† | 1.007† | 0.914† |
|  | (0.538) | (0.535) | (0.532) | (0.536) | (0.536) | (0.538) | (0.532) | (0.529) | (0.535) | (0.525) | (0.542) | (0.542) | (0.526) | (0.531) |
|  |  |  |  |  |  |  |  |  |  |  |  |  |  |  |
| bMarried | 0.450 | 0.479 | 0.509 | 0.468 | 0.468 | 0.467 | 0.501 | 0.462 | 0.498 | 0.508 | 0.475 | 0.475 | 0.438 | 0.481 |
|  | (0.580) | (0.585) | (0.581) | (0.582) | (0.582) | (0.582) | (0.577) | (0.578) | (0.587) | (0.584) | (0.585) | (0.585) | (0.594) | (0.580) |
|  |  |  |  |  |  |  |  |  |  |  |  |  |  |  |
| Widowed | -0.945 | -1.085 | -1.114 | -1.155 | -1.155 | -1.148 | -1.103 | -0.928 | -1.064 | -1.106 | -1.156 | -1.156 | -1.258 | -1.166 |
|  | (1.030) | (1.007) | (0.989) | (0.994) | (0.994) | (0.997) | (1.000) | (1.047) | (1.013) | (1.007) | (1.002) | (1.002) | (1.024) | (1.004) |
|  |  |  |  |  |  |  |  |  |  |  |  |  |  |  |
| Divorced | 2.287** | 2.195** | 2.222** | 2.184** | 2.184** | 2.181** | 2.203** | 2.275** | 2.214** | 2.201** | 2.183** | 2.183** | 2.117** | 2.183** |
|  | (0.743) | (0.755) | (0.750) | (0.756) | (0.756) | (0.753) | (0.748) | (0.732) | (0.745) | (0.741) | (0.753) | (0.753) | (0.752) | (0.733) |
|  |  |  |  |  |  |  |  |  |  |  |  |  |  |  |
| Religious Salience | -0.0957 | -0.125 | -0.125 | -0.125 | -0.125 | -0.125 | -0.119 | -0.101 | -0.120 | -0.127 | -0.123 | -0.123 | -0.134 | -0.113 |
|  | (0.107) | (0.104) | (0.104) | (0.104) | (0.104) | (0.105) | (0.105) | (0.106) | (0.104) | (0.104) | (0.104) | (0.104) | (0.103) | (0.104) |
|  |  |  |  |  |  |  |  |  |  |  |  |  |  |  |
| Religious Attendance | 0.130 | 0.133 | 0.133 | 0.135 | 0.135 | 0.136 | 0.130 | 0.131 | 0.129 | 0.137 | 0.134 | 0.134 | 0.141 | 0.131 |
|  | (0.157) | (0.152) | (0.153) | (0.154) | (0.154) | (0.154) | (0.152) | (0.157) | (0.152) | (0.154) | (0.154) | (0.154) | (0.153) | (0.153) |
|  |  |  |  |  |  |  |  |  |  |  |  |  |  |  |
| Cocaine | 0.575 | 0.580 | 0.571 | 0.576 | 0.576 | 0.570 | 0.571 | 0.556 | 0.612 | 0.601 | 0.593 | 0.593 | 0.596 | 0.638 |
|  | (0.589) | (0.586) | (0.591) | (0.590) | (0.590) | (0.594) | (0.590) | (0.597) | (0.586) | (0.596) | (0.595) | (0.595) | (0.603) | (0.590) |
|  |  |  |  |  |  |  |  |  |  |  |  |  |  |  |
| Stimulant | 0.615 | 0.703 | 0.712 | 0.792 | 0.792 | 0.790 | 0.770 | 0.604 | 0.739 | 0.706 | 0.808 | 0.808 | 0.739 | 0.810 |
|  | (0.704) | (0.678) | (0.669) | (0.687) | (0.687) | (0.686) | (0.680) | (0.696) | (0.682) | (0.672) | (0.684) | (0.684) | (0.673) | (0.673) |
|  |  |  |  |  |  |  |  |  |  |  |  |  |  |  |
| Sedative | 0.849 | 0.623 | 0.643 | 0.655 | 0.655 | 0.659 | 0.658 | 0.835 | 0.596 | 0.633 | 0.637 | 0.637 | 0.615 | 0.633 |
|  | (0.711) | (0.713) | (0.714) | (0.710) | (0.710) | (0.708) | (0.707) | (0.705) | (0.710) | (0.715) | (0.708) | (0.708) | (0.710) | (0.708) |
|  |  |  |  |  |  |  |  |  |  |  |  |  |  |  |
| Tranquilizer | 0.484 | 0.641 | 0.646 | 0.602 | 0.602 | 0.606 | 0.635 | 0.456 | 0.627 | 0.637 | 0.589 | 0.589 | 0.551 | 0.649 |
|  | (0.540) | (0.548) | (0.546) | (0.549) | (0.549) | (0.541) | (0.545) | (0.547) | (0.549) | (0.558) | (0.554) | (0.554) | (0.549) | (0.552) |
|  |  |  |  |  |  |  |  |  |  |  |  |  |  |  |
| Heroine | 0.605 | 0.215 | 0.233 | 0.330 | 0.330 | 0.338 | 0.230 | 0.645 | 0.205 | 0.265 | 0.340 | 0.340 | 0.439 | 0.256 |
|  | (0.994) | (0.995) | (1.003) | (1.005) | (1.005) | (1.008) | (1.017) | (0.985) | (0.980) | (0.991) | (0.994) | (0.994) | (0.998) | (1.019) |
|  |  |  |  |  |  |  |  |  |  |  |  |  |  |  |
| Pain Killers | 0.158 | 0.168 | 0.153 | 0.131 | 0.131 | 0.133 | 0.136 | 0.171 | 0.168 | 0.154 | 0.133 | 0.133 | 0.162 | 0.141 |
|  | (0.546) | (0.537) | (0.535) | (0.539) | (0.539) | (0.541) | (0.535) | (0.550) | (0.546) | (0.539) | (0.539) | (0.539) | (0.542) | (0.530) |
|  |  |  |  |  |  |  |  |  |  |  |  |  |  |  |
| Marijuana | -0.642 | -0.650 | -0.651 | -0.636 | -0.636 | -0.634 | -0.637 | -0.653 | -0.653 | -0.652 | -0.636 | -0.636 | -0.711 | -0.644 |
|  | (0.594) | (0.596) | (0.597) | (0.599) | (0.599) | (0.599) | (0.598) | (0.599) | (0.596) | (0.598) | (0.599) | (0.599) | (0.601) | (0.595) |
|  |  |  |  |  |  |  |  |  |  |  |  |  |  |  |
| PCP | -0.0333 | 0.875 | 0.849 | 0.893 | 0.893 | 0.910 | 0.933 | -0.0315 | 0.855 | 0.850 | 0.888 | 0.888 | 1.010 | 1.015 |
|  | (0.969) | (1.009) | (1.013) | (1.005) | (1.005) | (0.997) | (0.983) | (0.944) | (1.007) | (1.034) | (1.008) | (1.008) | (1.017) | (0.969) |
|  |  |  |  |  |  |  |  |  |  |  |  |  |  |  |
| Inhalants | -0.0139 | 0.0292 | 0.0468 | 0.0137 | 0.0137 | 0.00928 | 0.00444 | 0.00651 | 0.000946 | 0.0527 | 0.00465 | 0.00465 | 0.137 | -0.0370 |
|  | (0.602) | (0.611) | (0.609) | (0.607) | (0.607) | (0.603) | (0.607) | (0.604) | (0.613) | (0.608) | (0.606) | (0.606) | (0.588) | (0.598) |
|  |  |  |  |  |  |  |  |  |  |  |  |  |  |  |
| Tobacco | 0.805 | 0.859 | 0.879 | 0.868 | 0.868 | 0.872 | 0.875 | 0.803 | 0.850 | 0.878 | 0.864 | 0.864 | 0.872 | 0.853 |
|  | (0.539) | (0.533) | (0.534) | (0.534) | (0.534) | (0.536) | (0.533) | (0.540) | (0.532) | (0.536) | (0.535) | (0.535) | (0.537) | (0.530) |
|  |  |  |  |  |  |  |  |  |  |  |  |  |  |  |
| Age of 1st Alcohol Use | 0.0227 | 0.0461 | 0.0437 | 0.0368 | 0.0368 | 0.0387 | 0.0408 | 0.0203 | 0.0360 | 0.0453 | 0.0326 | 0.0326 | 0.0376 | 0.0393 |
|  | (0.286) | (0.285) | (0.286) | (0.287) | (0.287) | (0.289) | (0.285) | (0.287) | (0.289) | (0.289) | (0.289) | (0.289) | (0.289) | (0.287) |
|  |  |  |  |  |  |  |  |  |  |  |  |  |  |  |
| Risky Behaviors | 1.129*** | 1.187*** | 1.176*** | 1.190*** | 1.190*** | 1.193*** | 1.179*** | 1.133*** | 1.186*** | 1.191*** | 1.195*** | 1.195*** | 1.213*** | 1.183*** |
|  | (0.289) | (0.281) | (0.283) | (0.280) | (0.280) | (0.287) | (0.281) | (0.288) | (0.279) | (0.282) | (0.281) | (0.281) | (0.285) | (0.282) |
|  |  |  |  |  |  |  |  |  |  |  |  |  |  |  |
| c2009 | 2.018* | 2.062* | 2.047* | 2.125* | 2.125* | 2.123* | 2.115* | 2.009* | 2.057* | 2.057* | 2.117* | 2.117* | 2.131* | 2.120* |
|  | (0.886) | (0.885) | (0.878) | (0.882) | (0.882) | (0.883) | (0.876) | (0.876) | (0.884) | (0.870) | (0.875) | (0.875) | (0.883) | (0.864) |
|  |  |  |  |  |  |  |  |  |  |  |  |  |  |  |
| 2010 | 2.648* | 2.810* | 2.793* | 2.870* | 2.870* | 2.864* | 2.853* | 2.613* | 2.812* | 2.797* | 2.858* | 2.858* | 2.847* | 2.828* |
|  | (1.300) | (1.304) | (1.304) | (1.310) | (1.310) | (1.309) | (1.304) | (1.266) | (1.289) | (1.282) | (1.297) | (1.297) | (1.292) | (1.276) |
|  |  |  |  |  |  |  |  |  |  |  |  |  |  |  |
| 2011 | 4.975** | 4.929** | 4.897** | 5.052** | 5.052** | 5.030** | 4.958** | 4.919** | 4.941** | 4.890** | 5.048** | 5.048** | 4.973** | 4.985*** |
|  | (1.512) | (1.485) | (1.479) | (1.518) | (1.518) | (1.502) | (1.483) | (1.489) | (1.481) | (1.479) | (1.516) | (1.516) | (1.473) | (1.469) |
|  |  |  |  |  |  |  |  |  |  |  |  |  |  |  |
| 2012 | 2.896** | 2.886** | 2.964** | 2.984** | 2.984** | 2.972** | 2.934** | 2.918** | 2.868** | 2.984** | 2.969** | 2.969** | 3.079*** | 2.895** |
|  | (0.904) | (0.906) | (0.906) | (0.905) | (0.905) | (0.917) | (0.898) | (0.882) | (0.889) | (0.887) | (0.897) | (0.897) | (0.908) | (0.877) |
|  |  |  |  |  |  |  |  |  |  |  |  |  |  |  |
| 2013 | 2.867* | 2.766* | 2.764* | 2.788* | 2.788* | 2.792* | 2.758* | 2.835* | 2.756* | 2.774* | 2.781* | 2.781* | 2.791* | 2.776* |
|  | (1.206) | (1.212) | (1.211) | (1.216) | (1.216) | (1.210) | (1.205) | (1.193) | (1.219) | (1.210) | (1.213) | (1.213) | (1.196) | (1.200) |
|  |  |  |  |  |  |  |  |  |  |  |  |  |  |  |
| 2014 | 1.326 | 1.308 | 1.317 | 1.312 | 1.312 | 1.310 | 1.296 | 1.320 | 1.305 | 1.346 | 1.305 | 1.305 | 1.337 | 1.268 |
|  | (1.130) | (1.118) | (1.120) | (1.120) | (1.120) | (1.121) | (1.115) | (1.116) | (1.116) | (1.119) | (1.117) | (1.117) | (1.104) | (1.104) |
|  |  |  |  |  |  |  |  |  |  |  |  |  |  |  |
| 2015 | 1.553 | 1.555 | 1.538 | 1.591 | 1.591 | 1.584 | 1.543 | 1.535 | 1.549 | 1.534 | 1.576 | 1.576 | 1.541 | 1.514 |
|  | (0.971) | (0.969) | (0.971) | (0.972) | (0.972) | (0.976) | (0.964) | (0.957) | (0.968) | (0.964) | (0.965) | (0.965) | (0.973) | (0.948) |
|  |  |  |  |  |  |  |  |  |  |  |  |  |  |  |
| 2016 | 2.170* | 2.258* | 2.279* | 2.336* | 2.336* | 2.322* | 2.271* | 2.145* | 2.237* | 2.278* | 2.314* | 2.314* | 2.292* | 2.220* |
|  | (0.934) | (0.945) | (0.940) | (0.945) | (0.945) | (0.953) | (0.922) | (0.920) | (0.945) | (0.930) | (0.939) | (0.939) | (0.953) | (0.911) |
|  |  |  |  |  |  |  |  |  |  |  |  |  |  |  |
| 2017 | 2.827* | 2.899* | 2.894* | 2.935* | 2.935* | 2.923* | 2.899* | 2.780* | 2.929* | 2.894* | 2.943* | 2.943* | 2.897* | 2.951* |
|  | (1.184) | (1.211) | (1.209) | (1.201) | (1.201) | (1.223) | (1.192) | (1.202) | (1.224) | (1.222) | (1.202) | (1.202) | (1.229) | (1.205) |
|  |  |  |  |  |  |  |  |  |  |  |  |  |  |  |
| 2018 | 3.004** | 3.043** | 3.028** | 3.111** | 3.111** | 3.101** | 3.064** | 2.974** | 3.032** | 3.015** | 3.082** | 3.082** | 3.088** | 3.035** |
|  | (1.134) | (1.145) | (1.138) | (1.140) | (1.140) | (1.150) | (1.135) | (1.097) | (1.123) | (1.111) | (1.115) | (1.115) | (1.128) | (1.109) |
|  |  |  |  |  |  |  |  |  |  |  |  |  |  |  |
| 2019 | 3.602** | 3.391** | 3.361** | 3.470** | 3.470** | 3.462** | 3.424** | 3.550** | 3.399** | 3.362** | 3.460** | 3.460** | 3.368** | 3.413** |
|  | (1.229) | (1.237) | (1.245) | (1.248) | (1.248) | (1.252) | (1.235) | (1.207) | (1.228) | (1.223) | (1.236) | (1.236) | (1.234) | (1.212) |
|  |  |  |  |  |  |  |  |  |  |  |  |  |  |  |
| MDMA | 2.410** | 1.859* | 2.468** | 2.419** | 2.419** | 2.418** | 2.476** | 2.401** | 2.354 | 2.387** | 2.403** | 2.403** | 2.353** | 2.361** |
|  | (0.852) | (0.889) | (0.801) | (0.811) | (0.811) | (0.810) | (0.800) | (0.851) | (2.467) | (0.747) | (0.809) | (0.809) | (0.782) | (0.785) |
|  |  |  |  |  |  |  |  |  |  |  |  |  |  |  |
| LCPU | -0.707 |  |  |  |  |  |  | -0.904 |  |  |  |  |  |  |
|  | (0.677) |  |  |  |  |  |  | (1.757) |  |  |  |  |  |  |
|  |  |  |  |  |  |  |  |  |  |  |  |  |  |  |
| Priv Hlth Ins | -0.173 | -0.0783 | -0.0953 | -0.0717 | -0.0717 | -0.0674 | -0.0783 | -0.191 | -0.0499 | -0.0756 | -0.0565 | -0.0565 | -0.123 | -0.0333 |
|  | (0.554) | (0.559) | (0.561) | (0.557) | (0.557) | (0.558) | (0.560) | (0.560) | (0.564) | (0.571) | (0.566) | (0.566) | (0.563) | (0.566) |
|  |  |  |  |  |  |  |  |  |  |  |  |  |  |  |
| Pub Hlth Ins | 0.732 | 0.739 | 0.711 | 0.922 | 0.922 | 0.891 | 0.777 | -0.0112 | 0.356 | 0.160 | 0.437 | 0.437 | -0.270 | 0.594 |
|  | (0.737) | (0.666) | (0.676) | (0.639) | (0.639) | (0.684) | (0.669) | (1.590) | (1.482) | (1.471) | (1.467) | (1.467) | (1.610) | (1.503) |
|  |  |  |  |  |  |  |  |  |  |  |  |  |  |  |
| Oth Hlth Ins | 0.642 | 0.697 | 0.717 | 0.710 | 0.710 | 0.713 | 0.715 | 0.607 | 0.672 | 0.696 | 0.684 | 0.684 | 0.662 | 0.722 |
|  | (0.787) | (0.787) | (0.786) | (0.788) | (0.788) | (0.789) | (0.790) | (0.781) | (0.780) | (0.778) | (0.779) | (0.779) | (0.779) | (0.779) |
|  |  |  |  |  |  |  |  |  |  |  |  |  |  |  |
| LCPU * Pub Hlth Ins | 0.519 |  |  |  |  |  |  | 1.993 |  |  |  |  |  |  |
|  | (1.016) |  |  |  |  |  |  | (2.917) |  |  |  |  |  |  |
|  |  |  |  |  |  |  |  |  |  |  |  |  |  |  |
| Psilocybin |  | 1.109 | 0.499 | 1.074 | 1.074 | 1.069 | 1.139 |  | 1.152† | 0.974 | 1.093 | 1.093 | 0.862 | 1.157 |
|  |  | (0.699) | (0.789) | (0.711) | (0.711) | (0.705) | (0.710) |  | (0.690) | (2.220) | (0.707) | (0.707) | (0.720) | (0.703) |
|  |  |  |  |  |  |  |  |  |  |  |  |  |  |  |
| DMT |  | -2.459 | -2.952 | -3.033 | -3.033 | -3.065 | -2.999 |  | -2.297 | -2.908 | -3.012 | -3.012 | -2.989 | -2.930 |
|  |  | (2.081) | (2.255) | (2.082) | (2.082) | (2.098) | (2.193) |  | (2.105) | (2.256) | (2.094) | (2.094) | (2.083) | (2.155) |
|  |  |  |  |  |  |  |  |  |  |  |  |  |  |  |
| Peyote/Mescaline |  | 0.125 | 0.102 | 0.137 | 0.137 | 0.0642 | 0.144 |  | 0.124 | 0.0733 | 0.128 | 0.128 | 0.165 | 0.116 |
|  |  | (0.584) | (0.576) | (0.586) | (0.586) | (0.768) | (0.587) |  | (0.585) | (0.586) | (0.588) | (0.588) | (2.018) | (0.572) |
|  |  |  |  |  |  |  |  |  |  |  |  |  |  |  |
| LSD |  | -2.254** | -2.229** | -2.349** | -2.349** | -2.344** | -2.754*** |  | -2.290** | -2.214** | -2.361** | -2.361** | -2.221** | -3.428 |
|  |  | (0.692) | (0.726) | (0.740) | (0.740) | (0.736) | (0.721) |  | (0.683) | (0.703) | (0.742) | (0.742) | (0.677) | (2.085) |
|  |  |  |  |  |  |  |  |  |  |  |  |  |  |  |
| MDMA * Pub Hlth Ins |  | 1.528 |  |  |  |  |  |  | 0.297 |  |  |  |  |  |
|  |  | (1.262) |  |  |  |  |  |  | (3.469) |  |  |  |  |  |
|  |  |  |  |  |  |  |  |  |  |  |  |  |  |  |
| Psilocybin * Pub Hlth Ins |  |  | 1.486 |  |  |  |  |  |  | 2.155 |  |  |  |  |
|  |  |  | (1.307) |  |  |  |  |  |  | (3.803) |  |  |  |  |
|  |  |  |  |  |  |  |  |  |  |  |  |  |  |  |
| Peyote/Mescaline * Pub Hlth Ins |  |  |  |  |  | 0.183 |  |  |  |  |  |  | 4.765 |  |
|  |  |  |  |  |  | (1.185) |  |  |  |  |  |  | (3.323) |  |
|  |  |  |  |  |  |  |  |  |  |  |  |  |  |  |
| LSD * Pub Hlth Ins |  |  |  |  |  |  | 1.010 |  |  |  |  |  |  | -0.787 |
|  |  |  |  |  |  |  | (1.300) |  |  |  |  |  |  | (3.186) |
|  |  |  |  |  |  |  |  |  |  |  |  |  |  |  |
| LCPU * Education |  |  |  |  |  |  |  | 0.0810 |  |  |  |  |  |  |
|  |  |  |  |  |  |  |  | (0.600) |  |  |  |  |  |  |
|  |  |  |  |  |  |  |  |  |  |  |  |  |  |  |
| Pub Hlth Ins * Education |  |  |  |  |  |  |  | 0.315 | 0.157 | 0.233 | 0.200 | 0.200 | 0.495 | 0.0728 |
|  |  |  |  |  |  |  |  | (0.650) | (0.590) | (0.587) | (0.565) | (0.565) | (0.634) | (0.584) |
|  |  |  |  |  |  |  |  |  |  |  |  |  |  |  |
| LCPU * Pub Hlth Ins * Education |  |  |  |  |  |  |  | -0.626 |  |  |  |  |  |  |
|  |  |  |  |  |  |  |  | (1.102) |  |  |  |  |  |  |
|  |  |  |  |  |  |  |  |  |  |  |  |  |  |  |
| MDMA * Education |  |  |  |  |  |  |  |  | -0.215 |  |  |  |  |  |
|  |  |  |  |  |  |  |  |  | (0.881) |  |  |  |  |  |
|  |  |  |  |  |  |  |  |  |  |  |  |  |  |  |
| MDMA * Pub Hlth Ins * Education |  |  |  |  |  |  |  |  | 0.558 |  |  |  |  |  |
|  |  |  |  |  |  |  |  |  | (1.311) |  |  |  |  |  |
|  |  |  |  |  |  |  |  |  |  |  |  |  |  |  |
| Psilocybin * Education |  |  |  |  |  |  |  |  |  | -0.166 |  |  |  |  |
|  |  |  |  |  |  |  |  |  |  | (0.782) |  |  |  |  |
|  |  |  |  |  |  |  |  |  |  |  |  |  |  |  |
| Psilocybin * Pub Hlth Ins * Education |  |  |  |  |  |  |  |  |  | -0.347 |  |  |  |  |
|  |  |  |  |  |  |  |  |  |  | (1.654) |  |  |  |  |
|  |  |  |  |  |  |  |  |  |  |  |  |  |  |  |
| Peyote/Mescaline * Education |  |  |  |  |  |  |  |  |  |  |  |  | -0.0320 |  |
|  |  |  |  |  |  |  |  |  |  |  |  |  | (0.675) |  |
|  |  |  |  |  |  |  |  |  |  |  |  |  |  |  |
| Peyote/Mescaline * Pub Hlth Ins * Education |  |  |  |  |  |  |  |  |  |  |  |  | -1.890 |  |
|  |  |  |  |  |  |  |  |  |  |  |  |  | (1.278) |  |
|  |  |  |  |  |  |  |  |  |  |  |  |  |  |  |
| LSD * Education |  |  |  |  |  |  |  |  |  |  |  |  |  | 0.247 |
|  |  |  |  |  |  |  |  |  |  |  |  |  |  | (0.754) |
|  |  |  |  |  |  |  |  |  |  |  |  |  |  |  |
| LSD * Pub Hlth Ins * Education |  |  |  |  |  |  |  |  |  |  |  |  |  | 0.803 |
|  |  |  |  |  |  |  |  |  |  |  |  |  |  | (1.306) |
|  |  |  |  |  |  |  |  |  |  |  |  |  |  |  |
| Constant | 15.59*** | 14.99*** | 15.07*** | 14.90*** | 14.90*** | 14.91*** | 14.98*** | 15.81*** | 15.19*** | 15.18*** | 15.11*** | 15.11*** | 15.00*** | 15.25*** |
|  | (2.108) | (2.123) | (2.116) | (2.125) | (2.125) | (2.109) | (2.100) | (2.183) | (2.106) | (2.137) | (2.156) | (2.156) | (2.194) | (2.164) |
| Observations | 2065 | 2065 | 2065 | 2065 | 2065 | 2065 | 2065 | 2065 | 2065 | 2065 | 2065 | 2065 | 2065 | 2065 |
| *R*2 | 0.201 | 0.211 | 0.211 | 0.210 | 0.210 | 0.210 | 0.211 | 0.202 | 0.212 | 0.212 | 0.210 | 0.210 | 0.214 | 0.212 |

Standard errors in parentheses

Source: 2008-2019 National Survey of Drug Use and Health, n=484,732

aMen serve as the references category for Women

bSingle Serves as the reference category for Marital Statuses

c2008 serves as the reference category for the year survey was taken

† *p* < .10, * *p* < .05, ** *p* < .01, *** *p* < .001
